# Supplementary material for: Huntington's disease accelerates epigenetic aging of human brain and disrupts DNA methylation levels
Source: Aging (Albany NY). 2016 Jul 27;8(7):1485–504. doi: 10.18632/aging.101005 (PMC4993344; doi:10.18632/aging.101005)
Supplement: Supplementary file 2 [file aging-08-1485-s002.csv]

Name	Chromosome36	Coordinate36	Strand	UCSCRefGeneAccession	UCSCCpGIslandsName	CHR	Z.metaAnalysis	Z.Kruskal.in.Frontal	Z.Kruskal.in.Occipital	Z.Kruskal.in.Parietal	p.metaAnalysis	p.Kruskal.in.Frontal	p.Kruskal.in.Occipital	p.Kruskal.in.Parietal
cg00000029	16	52025613	F	NM_005611	chr16:53468284-53469209	16	3.22	2.36	1	2.1	0.00129	0.0182	0.317	0.0354
cg00000108	3	37434210	F	NM_178339;NM_178342		3	0.0637	0.482	1.09	-1.34	0.949	0.63	0.277	0.179
cg00000109	3	173398731	F	NM_001135095;NM_022763		3	2.54	1.84	1.19	1.34	0.0109	0.0656	0.232	0.181
cg00000165	1	90967262	R		chr1:91190489-91192804	1	-2.45	-0.66	-1.12	-2.46	0.0142	0.509	0.263	0.0137
cg00000236	8	42382451	R	NM_005662;NM_001135694		8	2.89	2.61	1.17	1.13	0.00391	0.00897	0.241	0.257
cg00000289	14	68410892	F	NM_001130005;NM_001130004;NM_001102	chr14:69341427-69341820	14	4.42	2.31	2.44	2.92	9.67e-06	0.0209	0.0146	0.00348
cg00000292	16	28797601	F	NM_004320;NM_173201	chr16:28890954-28891868	16	-3.64	-1.75	-1.25	-3.24	0.000268	0.0804	0.212	0.00121
cg00000321	8	41286959	R	NM_003012	chr8:41165852-41167140	8	2.49	1.91	0.871	1.46	0.0127	0.0565	0.383	0.143
cg00000363	1	228627416	F		chr1:230561103-230562702	1	-0.321	0.271	-0.71	-0.195	0.748	0.787	0.478	0.845
cg00000658	9	139117745	R	NM_016219	chr9:139997846-139998048	9	-0.121	-0.0396	0.635	-0.721	0.904	0.968	0.526	0.471
cg00000714	19	59387490	F	NM_024075;NM_001077446	chr19:54693034-54695497	19	0.478	1.05	-0.484	0.15	0.632	0.294	0.628	0.881
cg00000721	6	25390758	R	NM_017640	chr6:25279131-25279890	6	1.47	1.43	0.516	0.548	0.141	0.152	0.606	0.583
cg00000884	4	154829307	R	NM_003264	chr4:154605086-154606052	4	3.69	2.59	3.17	0.751	0.000224	0.00951	0.0015	0.453
cg00000905	15	57572598	R	NM_152450		15	-4.44	-2.51	-2.27	-2.89	8.92e-06	0.0119	0.0232	0.00383
cg00000924	11	2677039	F	NM_000218;NR_002728;NM_181798	chr11:2720410-2722087	11	0.892	0.732	-0.0215	0.766	0.372	0.464	0.983	0.444
cg00000957	1	5859840	F	NM_015102	chr1:5937157-5937392	1	-2.89	-1.78	-0.355	-2.72	0.00384	0.0748	0.723	0.00654
cg00001099	8	87150669	F	NM_033126	chr8:87081653-87082046	8	-0.184	-0.488	0.28	-0.0526	0.854	0.625	0.78	0.958
cg00001249	14	59459539	F		chr14:60386271-60386750	14	0.82	1.55	1.04	-1.13	0.412	0.121	0.297	0.257
cg00001261	16	3403965	F			16	-0.808	-0.963	-0.785	0.323	0.419	0.335	0.432	0.747
cg00001349	1	165225063	R	NM_032858	chr1:166958220-166958683	1	-4.87	-3.41	-1.7	-3.19	1.13e-06	0.000646	0.0891	0.00145
cg00001364	1	212236999	R	NM_002763		1	5.5	4.51	2.27	2.61	3.88e-08	6.58e-06	0.0232	0.00895
cg00001446	1	43603628	R	NM_022821	chr1:43832814-43833073	1	0.991	0.963	1.26	-0.437	0.322	0.335	0.208	0.662
cg00001510	19	59438757	R	NM_024318		19	-0.618	0.106	-0.742	-0.496	0.537	0.916	0.458	0.62
cg00001534	1	50807453	R	NM_007051		1	2.15	1.13	1.57	1.07	0.0316	0.259	0.116	0.283
cg00001593	1	168757058	R			1	3.78	2.61	2.5	1.49	0.000156	0.00915	0.0126	0.137
cg00001594	2	11402156	F	NM_004850;NM_004850	chr2:11483959-11485553	2	-2.08	-0.462	-1.24	-1.93	0.0379	0.644	0.216	0.0535
cg00001687	16	88289162	F	NR_027702;NR_027703;NM_001160367;NM_052988;NM_052987;NM_001098533	chr16:89761016-89761218	16	2.01	1.35	-0.355	2.3	0.0447	0.176	0.723	0.0215
cg00001791	2	102780474	F	NM_144632		2	2.06	1.64	1.69	0.293	0.0392	0.1	0.0912	0.77
cg00001793	12	11796657	F	NM_001987		12	3.99	2.12	1.85	2.91	6.55e-05	0.0341	0.0644	0.00365
cg00001854	16	45565992	F	NM_005880	chr16:47006827-47008029	16	3.54	2.42	1.41	2.23	0.000395	0.0154	0.159	0.0257
cg00001874	10	69660594	R	NM_145178;NM_145178	chr10:69990893-69991523	10	1.21	1.09	-0.129	1.03	0.226	0.276	0.897	0.303
cg00001930	18	58206064	R		chr18:60051869-60052387	18	2.57	2.3	1.44	0.689	0.0103	0.0217	0.149	0.491
cg00002033	19	44490321	R	NM_020862	chr19:39797786-39799250	19	2.18	0.475	1.16	2.16	0.0294	0.635	0.245	0.0311
cg00002080	21	29312288	F	NM_016940	chr21:30391264-30391758	21	2.6	0.996	1.82	1.75	0.00935	0.319	0.069	0.0801
cg00002224	8	144191774	F	NM_173687		8	-0.711	-0.653	-0.99	0.346	0.477	0.514	0.322	0.73
cg00002426	3	57718583	F	NM_007159	chr3:57741925-57742990	3	0.236	-0.647	-1.01	1.95	0.813	0.518	0.312	0.0508
cg00002449	10	29001571	F		chr10:28957408-28958116	10	1.31	1.43	1.12	-0.24	0.189	0.154	0.263	0.81
cg00002473	2	218697121	R	NM_001168298		2	3.75	2.57	1.68	2.19	0.00018	0.0103	0.0933	0.0288
cg00002593	1	1258656	F	NM_152228	chr1:1267435-1268986	1	0.172	0.62	-0.646	0.218	0.864	0.535	0.519	0.828
cg00002597	16	31345284	R	NM_005353	chr16:31438891-31439682	16	3.72	2.38	2.27	1.82	2e-04	0.0175	0.0232	0.0691
cg00002660	12	54869877	F	NM_001130420;NM_003075;NM_139067	chr12:56583406-56583682	12	-3.28	-1.89	-1.18	-2.53	0.00104	0.0583	0.237	0.0114
cg00002719	1	167663330	F	NM_021179	chr1:169396621-169396869	1	-3.98	-3.18	-1.86	-1.78	7e-05	0.00147	0.0628	0.075
cg00002749	17	55194320	R	NM_030938		17	5.03	3.09	2.67	2.93	4.91e-07	0.00197	0.00764	0.00334
cg00002808	1	221635323	F	NM_152610;NM_152610	chr1:223566642-223567268	1	0.762	0.224	0.958	0.21	0.446	0.822	0.338	0.833
cg00002837	1	44285945	R			1	0.456	0.178	0.28	0.338	0.648	0.859	0.78	0.735
cg00002930	6	31623377	F	NM_005007;NM_001144963;NM_130463;NM_005007;NM_001144961;NM_001144961;NM_138282;NM_001144962		6	-4.93	-2.15	-2.55	-3.85	8.12e-07	0.0315	0.0108	0.00012
cg00003014	3	198764216	R	NM_004051;NM_203314;NM_203315	chr3:197281605-197283128	3	2.43	2.24	1.88	0.128	0.015	0.0249	0.0597	0.898
cg00003091	4	1684802	F	NM_006527	chr4:1713267-1714980	4	-0.163	0.64	0.0646	-0.992	0.87	0.522	0.949	0.321
cg00003181	6	146199060	R			6	0.0629	0.726	0.0215	-0.661	0.95	0.468	0.983	0.509
cg00003187	1	8662568	F	NM_012102;NM_001042681		1	2.38	1.39	0.764	1.89	0.0175	0.164	0.445	0.0584
cg00003287	1	199612772	R	NM_001001431;NM_001001430;NM_001001432;NM_000364		1	2.08	2.02	1.51	0.0901	0.0379	0.0435	0.132	0.928
cg00003298	12	112385593	R	NM_022363	chr12:113900750-113906442	12	1.74	1	0.463	1.49	0.0813	0.316	0.644	0.135
cg00003305	19	35407485	R		chr19:30715549-30715753	19	-3.62	-1.59	-2.21	-2.52	0.000295	0.112	0.0274	0.0119
cg00003345	1	10739086	R	NM_001079843;NM_017766		1	2.84	2.43	0.689	1.67	0.00457	0.0152	0.491	0.0954
cg00003513	1	10680023	F	NM_001079843;NM_017766	chr1:10757891-10758252	1	5.01	3.77	2.7	2.19	5.32e-07	0.000165	0.00692	0.0288
cg00003529	3	150992805	R	NM_001144960		3	2.15	2.09	0.861	0.714	0.0316	0.0371	0.389	0.475
cg00003578	1	12523116	R		chr1:12600347-12600556	1	-1.04	-0.567	-0.538	-0.691	0.299	0.57	0.591	0.49
cg00003625	17	46267542	R	NM_175575		17	0.858	0.271	1.17	0.135	0.391	0.787	0.241	0.892
cg00003722	10	4490434	F			10	2.49	2.15	1.25	0.871	0.0129	0.0315	0.212	0.384
cg00003818	19	17197525	R	NM_024578	chr19:17336906-17337868	19	1.6	0.746	0.807	1.21	0.11	0.456	0.42	0.227
cg00003858	1	44853187	R	NM_018150	chr1:45082739-45083285	1	2.49	0.792	1.84	1.76	0.013	0.428	0.0665	0.0788
cg00003900	16	2837075	R			16	-3.67	-1.83	-2.53	-2.07	0.000247	0.068	0.0115	0.0389
cg00003965	3	109959568	R	NM_032579		3	2.15	2.55	2.81	-1.46	0.0312	0.0109	0.00495	0.145
cg00003994	7	15692387	R	NM_005924		7	-2.63	-1.91	-0.43	-2.08	0.0086	0.0565	0.667	0.0375
cg00004061	6	81853913	R			6	0.0537	-0.772	0.495	0.451	0.957	0.44	0.621	0.652
cg00004072	19	44589855	F	NM_003407	chr19:39897241-39898942	19	0.197	-0.244	0.237	0.376	0.844	0.807	0.813	0.707
cg00004073	2	236692331	R	NM_014914;NM_001037131	chr2:237028848-237029121	2	-0.145	0.198	-0.0646	-0.391	0.885	0.843	0.949	0.696
cg00004082	4	9629458	F	NM_020041;NM_001001290	chr4:10020481-10021026	4	-2.38	-2	-1.52	-0.616	0.0172	0.0456	0.129	0.538
cg00004089	17	72190431	R	NM_001008528;NM_001008529;NM_198530		17	-0.141	1.93	-0.214	-2.04	0.888	0.0532	0.831	0.041
cg00004105	10	100012598	F	NM_032211		10	-1.82	-0.917	-0.624	-1.57	0.0688	0.359	0.533	0.116
cg00004121	1	141560523	R		chr1:142618751-142619238	1	-2.11	-1.35	-0.613	-1.62	0.0351	0.176	0.54	0.106
cg00004192	22	19728553	R	NR_002829	chr22:21399979-21400270	22	3.2	1.75	1.1	2.62	0.00137	0.0804	0.272	0.00875
cg00004209	1	16876854	R		chr1:17006742-17007151	1	-3.6	-1.95	-2.15	-2.17	0.000313	0.0516	0.0314	0.0299
cg00004219	12	131102786	R	NM_015409		12	-1.62	-0.0858	-1.81	-1.04	0.106	0.932	0.0707	0.296
cg00004257	1	34401762	F	NM_052896	chr1:34628783-34630976	1	-2.16	-1.66	-0.549	-1.44	0.031	0.0977	0.583	0.149
cg00004421	17	7415803	R	NM_001416;NM_015670	chr17:7475916-7477330	17	-0.392	0.29	-1.44	0.308	0.695	0.772	0.149	0.758
cg00004429	9	139801027	F	NM_024757	chr9:140683120-140683774	9	-1.55	-0.719	-1.22	-0.796	0.122	0.472	0.224	0.426
cg00004608	6	134314156	R		chr6:134273310-134274844	6	0.0523	1.44	-0.979	-0.533	0.958	0.15	0.328	0.594
cg00004667	1	16165333	R	NM_003443		1	-1.21	-0.396	0.118	-1.75	0.224	0.692	0.906	0.0807
cg00004700	2	105380317	R	NM_201557;NM_001039492;NM_001450;NM_201555	chr2:106014878-106015884	2	1.27	1.13	-0.559	1.46	0.205	0.256	0.576	0.145
cg00004771	6	72351547	F		chr6:72294372-72294988	6	1.45	0.666	0.871	0.992	0.147	0.505	0.383	0.321
cg00004773	12	75247086	F			12	3.54	2.63	1.71	1.74	0.000407	0.00863	0.0871	0.0814
cg00004775	22	44895167	F		chr22:46518454-46518729	22	1.57	1.17	1.79	-0.128	0.116	0.243	0.0741	0.898
cg00004806	6	161478095	F	NM_020133		6	-0.0399	-0.0858	0.947	-0.811	0.968	0.932	0.344	0.417
cg00004818	4	178601140	F	NM_000027	chr4:178363239-178363708	4	-2.84	-1.83	-1.53	-1.54	0.00458	0.0666	0.127	0.124
cg00004859	3	112095584	R			3	4.41	3.48	2.88	1.31	1.01e-05	0.000506	0.00393	0.189
cg00004883	16	73705961	F	NM_194436;NM_153486	chr16:75148398-75148864	16	-2.11	-0.871	-1.24	-1.56	0.0351	0.384	0.216	0.118
cg00004963	6	147166689	F	NR_003954;NM_024694		6	0.817	0.112	0.775	0.578	0.414	0.911	0.439	0.563
cg00004979	12	110369849	F	NM_005475		12	0.865	0.152	0.129	1.19	0.387	0.879	0.897	0.235
cg00004996	8	17315906	F	NM_004686	chr8:17270603-17271120	8	0.563	-0.328	-0.387	1.62	0.574	0.743	0.699	0.105
cg00005040	6	127480899	F	NM_032784	chr6:127439265-127441072	6	-3.72	-2.24	-1.74	-2.42	0.000203	0.0253	0.0813	0.0156
cg00005072	16	87899483	R	NM_013275	chr16:89371981-89373514	16	0.774	1.03	-0.656	0.819	0.439	0.303	0.512	0.413
cg00005112	16	68516341	F	NM_199424;NM_007014		16	0.7	0.95	-0.0968	0.285	0.484	0.342	0.923	0.775
cg00005164	19	40203362	R	NM_020895;NM_001136199	chr19:35512589-35512809	19	3.06	2.2	1.39	1.67	0.00221	0.028	0.165	0.0954
cg00005166	16	3204443	F	NR_002169		16	-2.23	-0.436	-1.96	-1.59	0.0254	0.663	0.0502	0.111
cg00005215	18	59374357	R	NM_080474		18	3.2	2.4	1.1	1.94	0.00138	0.0163	0.271	0.0526
cg00005297	4	3435165	R	NM_173660;NM_001164673	chr4:3464799-3465440	4	-0.263	0.567	0.0108	-1.04	0.793	0.57	0.991	0.3
cg00005390	16	2509282	F	NM_015944;NM_001694;NM_001145815	chr16:2569559-2571071	16	1.39	1.26	-0.194	1.22	0.164	0.208	0.846	0.224
cg00005437	17	17951465	F	NM_001388;NM_016239		17	-0.771	0.211	-0.527	-1.05	0.441	0.833	0.598	0.293
cg00005541	12	131519936	R		chr12:133009744-133009973	12	1.03	0.0792	-0.204	1.84	0.301	0.937	0.838	0.0657
cg00005617	X	67976623	R	NM_004429	chrX:68060178-68060558	23	-1.57	-1.6	-1.3	0.15	0.117	0.11	0.193	0.881
cg00005619	11	47565298	R	NM_001164379	chr11:47611138-47612438	11	1.04	0.746	-0.172	1.13	0.298	0.456	0.863	0.257
cg00005622	8	145252391	R		chr8:145180543-145181000	8	0.897	0.593	-0.323	1.18	0.37	0.553	0.747	0.238
cg00005740	13	22977418	R			13	3.48	1.85	2.68	1.6	0.000494	0.0637	0.00738	0.11
cg00005817	4	75387605	R	NM_001144978		4	5.1	3.64	2.97	2.22	3.39e-07	0.00027	0.00298	0.0262
cg00005847	2	176737319	F	NM_006898	chr2:177029413-177029941	2	0.24	1.12	-0.592	-0.225	0.811	0.265	0.554	0.822
cg00005849	2	236735921	F		chr2:237071794-237078762	2	3.1	1.5	1.5	2.35	0.00196	0.134	0.135	0.0187
cg00005861	10	112058211	F		chr10:112064137-112064859	10	2.13	1.14	1.31	1.25	0.0332	0.254	0.189	0.21
cg00006081	10	124898897	R	NM_005519	chr10:124907283-124911035	10	-2.18	-1.58	-1.02	-1.14	0.0295	0.115	0.307	0.254
cg00006090	16	70764156	R	NM_031293;NM_001160213		16	3.95	3.34	1.4	1.98	7.73e-05	0.000841	0.162	0.0474
cg00006198	1	152742930	F	NM_182499;NM_001098475	chr1:154474107-154475699	1	4.34	3.02	2.6	1.92	1.41e-05	0.00257	0.00922	0.0554
cg00006243	2	26580069	R	NM_194248	chr2:26726189-26726710	2	2.4	2.43	0.785	0.841	0.0164	0.0149	0.432	0.4
cg00006397	1	158603323	F	NM_005598	chr1:160340604-160340843	1	-1.29	-0.475	-0.742	-1.02	0.199	0.635	0.458	0.307
cg00006459	4	148855166	F			4	2.17	2.14	0.915	0.654	0.03	0.0327	0.36	0.513
cg00006626	1	152394086	R	NM_001159484;NM_207308		1	3.27	2.1	0.538	2.87	0.00108	0.0359	0.591	0.00411
cg00006787	13	109331442	R			13	1.75	1.45	0.269	1.22	0.0798	0.147	0.788	0.224
cg00006815	X	103697564	R	NM_017416	chrX:103811550-103812043	23	-0.969	-0.541	-0.452	-0.676	0.333	0.588	0.651	0.499
cg00006867	15	87867810	F	NR_027074;NR_027076;NR_027075;NR_027077		15	1.26	0.759	0.592	0.826	0.206	0.448	0.554	0.409
cg00007064	9	124013974	R	NM_199160;NM_014368	chr9:124975753-124976692	9	1.11	1.11	-0.215	0.925	0.265	0.268	0.83	0.355
cg00007076	8	67505154	F	NM_015169;NM_015169	chr8:67344497-67344989	8	-0.303	0.528	-0.387	-0.714	0.762	0.598	0.699	0.475
cg00007215	17	21356874	R		chr17:21416250-21416492	17	-2.42	-1.24	-0.979	-1.93	0.0156	0.215	0.328	0.0535
cg00007221	1	43771607	F	NM_002840;NM_130440	chr1:43996724-43997592	1	-1.02	-0.106	-1.69	-0.12	0.309	0.916	0.0912	0.904
cg00007239	4	166096495	F	NM_153027;NM_001012414	chr4:165878036-165878446	4	1.59	0.587	0.904	1.27	0.113	0.557	0.366	0.204
cg00007324	19	3998803	F	NM_015898	chr19:4047754-4048428	19	1.65	0.238	-0.516	2.99	0.0987	0.812	0.606	0.00279
cg00007326	19	13227046	R	NM_001127222;NM_001127221	chr19:13365922-13366158	19	2.89	2.45	1.32	1.17	0.00391	0.0144	0.186	0.241
cg00007420	6	99903453	R	NM_032511	chr6:99797208-99797946	6	-0.0502	-1.19	-0.925	1.95	0.96	0.235	0.355	0.0508
cg00007540	14	102679018	F		chr14:103604539-103605504	14	0.915	0.561	1.09	0.00751	0.36	0.575	0.277	0.994
cg00007644	11	20579835	R	NM_004211	chr11:20622720-20623399	11	0.0582	0.152	0.258	-0.285	0.954	0.879	0.796	0.775
cg00007675	8	37725737	R	NR_003671;NM_007175		8	0.023	0.337	-0.29	-0.0526	0.982	0.736	0.771	0.958
cg00007800	1	1828378	R		chr1:1839958-1840601	1	0.734	0.627	0.689	-0.015	0.463	0.531	0.491	0.988
cg00007810	12	47400005	R		chr12:49110055-49110881	12	2.24	0.825	0.183	2.76	0.0252	0.409	0.855	0.00584
cg00008004	1	152022743	R		chr1:153755957-153756335	1	1.12	0.963	0.247	0.681	0.261	0.335	0.805	0.496
cg00008033	19	57121792	R	NM_024840;NM_001031721		19	1.39	1.25	-0.441	1.43	0.165	0.21	0.659	0.151
cg00008345	2	232352087	R	NM_002601	chr2:232645313-232646505	2	3.31	2.7	1.88	1.14	0.000923	0.00696	0.0597	0.254
cg00008446	1	155082398	F	NM_001007792;NM_014215	chr1:156814881-156815792	1	0.508	0.224	-0.204	0.804	0.612	0.822	0.838	0.422
cg00008452	12	97650400	R	NM_181861;NM_013229;NM_181868;NM_181869;NM_001160		12	3.52	2.78	1.9	1.37	0.00044	0.00536	0.0569	0.169
cg00008488	5	175132521	R		chr5:175200315-175200555	5	2	1.89	0.398	1.07	0.0454	0.0591	0.691	0.283
cg00008493	14	92883530	R	NM_182971;NM_020818	chr14:93813483-93814111	14	4.1	3.33	1.65	2.04	4.06e-05	0.000882	0.0997	0.0418
cg00008544	5	179711133	F	NM_005110	chr5:179779114-179781279	5	3.79	2.37	1.93	2.25	0.000151	0.0178	0.0541	0.0247
cg00008564	6	27938370	F		chr6:27833120-27833406	6	-1.71	-1.22	-0.818	-0.909	0.0865	0.222	0.414	0.363
cg00008612	13	59624244	R	NM_001042517		13	0.209	0.0594	-0.043	0.329	0.835	0.953	0.966	0.742
cg00008621	14	61249736	F	NM_001530;NM_181054		14	1.36	1.22	0.807	0.323	0.174	0.222	0.42	0.747
cg00008629	9	114133482	R	NM_001163790;NM_005156;NM_001163788	chr9:115095149-115095919	9	1.53	1.56	1.05	0.03	0.127	0.118	0.292	0.976
cg00008665	3	43121784	R	NM_032806	chr3:43147184-43147713	3	-1.13	-0.944	-1.69	0.556	0.259	0.345	0.0912	0.578
cg00008671	10	86077941	R	NM_018999	chr10:86088395-86088791	10	-0.0998	0.653	-0.828	-0.113	0.921	0.514	0.407	0.91
cg00008695	8	948128	R		chr8:962315-962747	8	2.37	2.55	1.88	-0.285	0.0177	0.0109	0.0597	0.775
cg00008800	2	38563675	R			2	3.72	1.96	1.3	3.09	0.000201	0.0501	0.193	0.00197
cg00008932	X	71415322	R	NM_001007	chrX:71496700-71497227	23	-1.54	-0.534	-1.02	-1.15	0.123	0.593	0.307	0.25
cg00008945	X	80264035	F	NM_030763		23	-1.57	-0.64	-1.87	-0.346	0.115	0.522	0.0612	0.73
cg00008971	1	45739512	R	NM_015506;NM_001102601	chr1:45965586-45966049	1	-0.791	-0.785	-0.398	-0.173	0.429	0.432	0.691	0.863
cg00009001	12	118636273	F	NR_031589;NM_007174		12	3.33	2.69	1.3	1.68	0.000878	0.0071	0.193	0.0924
cg00009038	2	131868637	R		chr2:132152149-132152440	2	-0.0358	0.112	-0.183	-0.015	0.971	0.911	0.855	0.988
cg00009053	11	61040441	R	NM_004200	chr11:61283864-61284147	11	1.08	1.8	0.398	-0.383	0.279	0.0716	0.691	0.702
cg00009088	11	60686764	R	NM_017966	chr11:60928560-60929262	11	3.84	1.72	2.39	2.59	0.000125	0.0862	0.0169	0.00955
cg00009196	20	19902588	F	NM_018993	chr20:19955536-19956034	20	-1.66	-0.581	0.0323	-2.23	0.0962	0.561	0.974	0.0257
cg00009292	1	50654669	F		chr1:50881884-50882103	1	-1.67	-2.06	0.0383	-0.721	0.0949	0.0392	0.969	0.471
cg00009306	14	22059423	F			14	-1.46	-0.284	-0.667	-1.58	0.145	0.777	0.505	0.115
cg00009349	14	21744389	R			14	0.724	-0.244	0.656	0.894	0.469	0.807	0.512	0.371
cg00009421	2	43919075	F	NM_022436;NM_022437		2	-1.66	-0.963	-0.947	-0.969	0.097	0.335	0.344	0.333
cg00009436	4	186639625	F			4	1.83	1.48	0.904	0.759	0.0671	0.138	0.366	0.448
cg00009523	2	1155351	F	NM_018968	chr2:1163016-1163820	2	-0.433	-0.838	-0.958	0.977	0.665	0.402	0.338	0.329
cg00009553	16	60411585	F	NM_001796		16	4.49	3.06	2.35	2.34	7.26e-06	0.00225	0.019	0.0192
cg00009750	2	202439137	F	NM_139158		2	3.18	1.48	2.41	1.71	0.00145	0.138	0.016	0.0868
cg00009796	16	33226411	R		chr16:33318698-33319468	16	-2.8	-1.83	-0.947	-2	0.00505	0.0666	0.344	0.0457
cg00009834	1	1337534	R			1	0.854	-0.343	1.05	0.864	0.393	0.732	0.292	0.388
cg00009871	13	102330261	R	NR_026965		13	1.72	1.86	0.0861	0.909	0.0848	0.0628	0.931	0.363
cg00009922	13	109665377	F	NM_001845		13	2.94	2.38	1.1	1.53	0.00331	0.0175	0.272	0.125
cg00009944	21	46841660	F		chr21:48018542-48018791	21	-1.61	-0.917	-1.16	-0.736	0.108	0.359	0.245	0.462
cg00010078	2	109333604	F	NM_001099289		2	-0.0591	0.152	0.204	-0.436	0.953	0.879	0.838	0.663
cg00010242	14	80650518	F	NM_000369		14	1.74	1.17	-0.301	2	0.0811	0.242	0.763	0.0457
cg00010445	19	13950630	R	NM_002918	chr19:14089570-14089796	19	1.76	0.878	1.33	0.894	0.0776	0.38	0.182	0.371
cg00010654	1	45248705	F	NM_024602	chr1:45476225-45477022	1	-2.65	-2.1	-1.5	-0.977	0.00807	0.0353	0.135	0.329
cg00010672	2	55135285	R		chr2:55276555-55278044	2	4.59	3.28	1.71	2.84	4.46e-06	0.00104	0.0871	0.00447
cg00010742	1	90955577	F	NM_020063	chr1:91183240-91184540	1	-0.0764	-0.211	-0.172	0.24	0.939	0.833	0.863	0.81
cg00010789	2	232029585	F	NM_005381;NR_002921;NR_002908		2	3.78	2.69	2.93	1.01	0.000158	0.0071	0.00343	0.311
cg00010853	6	30761146	F	NM_001134870;NM_133471	chr6:30654392-30654934	6	1.68	1.2	1.69	0.0977	0.0939	0.23	0.0912	0.922
cg00010890	12	74692780	F			12	2.52	1.76	1.36	1.23	0.0118	0.0781	0.175	0.218
cg00010932	2	170388910	F	NM_014168	chr2:170681219-170681587	2	0.892	0.317	-0.559	1.67	0.372	0.751	0.576	0.0954
cg00010946	3	159301976	F	NM_001163678;NM_006884;NM_003030	chr3:157821232-157821604	3	-2.37	-2.62	-0.99	-0.428	0.0176	0.0088	0.322	0.669
cg00010947	4	84596424	R	NM_133636;NM_016067	chr4:84376666-84377237	4	-3.45	-2.48	-1.36	-2.06	0.000563	0.0131	0.175	0.0396
cg00010954	16	53177556	R			16	-2.47	-1.99	-1.52	-0.774	0.0135	0.0463	0.129	0.439
cg00011122	16	11346528	R	NM_152308	chr16:11439186-11439767	16	-3.53	-1.43	-1.17	-3.43	0.000419	0.152	0.241	0.000597
cg00011200	X	48265178	R	NM_006579;NM_006579	chrX:48379897-48380637	23	3.06	1.95	0.796	2.45	0.0022	0.0516	0.426	0.0143
cg00011225	2	219446558	F	NM_006522	chr2:219738081-219738788	2	0.733	-0.455	-0.549	2.19	0.464	0.649	0.583	0.0288
cg00011239	2	20739701	R			2	3.58	2.26	0.871	2.93	0.000349	0.024	0.383	0.00339
cg00011346	2	213112104	F	NM_005235;NM_001042599	chr2:213402180-213403867	2	-2.31	-1.9	-1.27	-0.811	0.021	0.0574	0.204	0.417
cg00011459	16	8797926	F	NM_015421;NM_000303	chr16:8891322-8891928	16	2.63	1.93	1.4	1.2	0.0086	0.0532	0.162	0.229
cg00011513	1	150751010	R	NM_178438	chr1:152487978-152488270	1	1.49	0.851	0.108	1.54	0.136	0.395	0.914	0.124
cg00011564	16	3531729	F	NM_178844		16	3.14	2.5	1.19	1.67	0.00166	0.0124	0.232	0.0954
cg00011605	16	83751030	F		chr16:85196735-85196992	16	1.07	0.858	0.172	0.766	0.285	0.391	0.863	0.444
cg00011616	17	73184018	F			17	0.563	-0.271	-0.861	1.98	0.574	0.787	0.389	0.0474
cg00011740	16	47869404	F		chr16:49311413-49312308	16	-1.48	-1.36	-0.301	-0.819	0.14	0.174	0.763	0.413
cg00011856	2	217269191	R	NM_000599	chr2:217559039-217559484	2	3.61	2.22	2.05	1.98	0.000309	0.0262	0.0399	0.0482
cg00011861	14	102677018	F		chr14:103604539-103605504	14	-0.435	-0.851	0.0108	0.135	0.664	0.395	0.991	0.892
cg00011891	X	153367854	R	NM_014235	chrX:153714288-153715375	23	1.66	1.02	-0.0968	1.83	0.097	0.306	0.923	0.0679
cg00011924	17	8241917	R	NM_001146684		17	-3.17	-1.95	-2.11	-1.47	0.00154	0.0514	0.035	0.141
cg00011994	6	30819883	R	NM_005803;NM_003897	chr6:30710307-30712440	6	4.12	2.61	0.603	3.71	3.83e-05	0.00897	0.547	0.000207
cg00012123	5	720619	F	NM_007030	chr5:667947-668589	5	1.86	1.58	0.484	1.07	0.0635	0.113	0.628	0.286
cg00012148	6	54280956	F	NM_014464		6	3.39	2.31	2.13	1.46	0.000695	0.0209	0.0331	0.145
cg00012238	18	19972456	R	NM_138643;NM_012189;NM_153769;NM_153768;NM_153770;NM_138644	chr18:21718862-21719550	18	-0.841	-0.356	-0.194	-0.879	0.4	0.722	0.846	0.379
cg00012317	1	147637598	R	NR_027484		1	-0.404	0.897	0.183	-1.77	0.686	0.37	0.855	0.0775
cg00012343	6	15664887	R	NM_183041;NM_183040;NM_032122		6	2.7	1.68	1.54	1.46	0.00696	0.0924	0.124	0.145
cg00012362	1	151866111	R	NM_005979;NM_001024213;NM_001024211;NM_001024213;NM_006271;NM_001024210;NM_001024212		1	-0.158	-0.403	0.366	-0.173	0.875	0.687	0.715	0.863
cg00012395	X	129299742	R		chrX:129473463-129473945	23	3.89	2.88	2.02	1.8	0.000101	0.00401	0.0431	0.0714
cg00012529	12	131406970	R	NM_001122636	chr12:132896299-132896569	12	2.41	2.36	0.161	1.49	0.0158	0.0185	0.872	0.135
cg00012576	13	93366321	F	NM_005708		13	-2.26	-2.16	0.258	-1.81	0.0235	0.0304	0.796	0.0702
cg00012638	6	39388519	F	NM_031460;NM_001135111	chr6:39281135-39282215	6	0.229	1.45	-1.61	0.315	0.819	0.148	0.107	0.752
cg00012692	13	19703487	F	NM_001110220;NM_001110219;NM_001110221;NM_006783	chr13:20806016-20806867	13	1.9	0.924	1.52	0.916	0.0572	0.356	0.129	0.359
cg00012698	15	31946059	R	NM_020371		15	-0.919	-0.739	-1.11	0.188	0.358	0.46	0.268	0.851
cg00013015	6	33974294	R			6	1.35	0.812	0.592	0.909	0.178	0.417	0.554	0.363
cg00013349	1	76821968	R	NM_152996		1	4.57	3.55	2.26	2.06	4.76e-06	0.000385	0.0239	0.0396
cg00013369	1	191124217	F			1	2.78	1.47	1.51	1.83	0.00551	0.141	0.132	0.0668
cg00013410	17	57497374	F	NM_005121;NM_005121	chr17:60142247-60143516	17	-3.15	-1.48	-1.78	-2.21	0.00165	0.138	0.0759	0.0272
cg00013441	12	121824861	R	NM_201435;NR_027918;NM_032573		12	3.55	2.3	1.62	2.18	0.000383	0.0213	0.104	0.0294
cg00013451	8	23767534	R	NM_003155		8	-2.72	-2.52	-1.11	-1.01	0.00654	0.0117	0.268	0.314
cg00013475	2	71534229	F	NM_001130981;NM_001130980;NM_001130978;NM_001130976;NM_001130977;NM_003494;NM_001130979	chr2:71680558-71681276	2	0.177	0.271	-0.269	0.255	0.86	0.787	0.788	0.798
cg00013543	6	32150636	R	NM_019105		6	-2.36	-1.48	-1.13	-1.46	0.0183	0.139	0.259	0.145
cg00013569	17	78208981	R	NM_006822		17	3.09	1.68	1.52	2.13	0.00204	0.0937	0.129	0.0329
cg00013618	22	20710839	R			22	2.1	1.25	0.968	1.4	0.0354	0.212	0.333	0.16
cg00013655	16	569016	R	NM_148920;NM_004204	chr16:629463-629903	16	-3.46	-1.89	-2.4	-1.76	0.000548	0.0583	0.0164	0.0788
cg00013660	9	139188591	R		chr9:140068792-140069082	9	1.06	0.409	0.334	1.07	0.288	0.682	0.739	0.283
cg00013733	19	1374273	F	NM_018959;NM_170711	chr19:1423752-1424006	19	2.71	1.7	0.366	2.49	0.00682	0.0899	0.715	0.0129
cg00013804	2	9276028	R	NM_001135191;NM_003887		2	3.2	3.33	1.61	0.541	0.00138	0.000882	0.107	0.589
cg00013899	1	64765021	R	NM_020925		1	1.96	2.25	0.678	0.383	0.0502	0.0244	0.498	0.702
cg00014104	22	20550367	R	NM_138957;NM_002745	chr22:22221055-22222367	22	0.39	0.515	-0.947	0.97	0.697	0.607	0.344	0.332
cg00014112	2	127130000	F	NM_016815;NM_002101	chr2:127413696-127414171	2	-2.53	-1.12	-1.19	-2.06	0.0115	0.265	0.232	0.0396
cg00014118	1	1925421	F	NM_001080484	chr1:1935166-1935452	1	-0.973	-0.924	-1.16	0.331	0.331	0.356	0.248	0.741
cg00014152	X	48342072	F	NR_029427;NM_017883;NM_001166426;NM_001166426	chrX:48457110-48457338	23	2.87	1.56	1.33	2.06	0.00408	0.119	0.182	0.0395
cg00014168	1	6434465	F	NM_031475	chr1:6511689-6512110	1	-2.63	-1.93	-1.44	-1.16	0.0086	0.0532	0.149	0.244
cg00014194	9	137118584	F	NM_014279;NM_006334	chr9:137978821-137980254	9	0.867	0.594	0.323	0.563	0.386	0.553	0.747	0.573
cg00014203	17	7698694	F	NM_001080424;NM_203411	chr17:7758607-7758980	17	4.37	2.45	2.11	2.98	1.24e-05	0.0144	0.035	0.00286
cg00014260	8	10420481	F	NM_198464		8	-0.375	0.066	0	-0.699	0.708	0.947	1	0.485
cg00014289	11	124215085	F		chr11:124709222-124709957	11	-1.14	-0.403	-0.603	-0.977	0.254	0.687	0.547	0.329
cg00014301	2	3306034	F	NM_003310		2	2.93	1.67	1.41	1.98	0.00338	0.095	0.159	0.0482
cg00014333	8	20174303	R			8	-0.597	0.172	-0.678	-0.586	0.551	0.864	0.498	0.558
cg00014377	7	101150896	R			7	3.54	2.8	2.33	1.03	0.000396	0.00515	0.0196	0.303
cg00014445	1	43806640	F	NM_002840;NM_130440	chr1:44031286-44031853	1	4.46	2.53	2.57	2.64	8.2e-06	0.0115	0.0101	0.00819
cg00014561	16	55320407	F	NM_014669	chr16:56763993-56764482	16	1.05	1.2	-0.71	1.15	0.295	0.23	0.478	0.25
cg00014638	10	94103631	F	NM_017824		10	4.12	3.14	0.592	3.18	3.81e-05	0.00168	0.554	0.00149
cg00014733	22	28060659	R	NM_001166019;NR_003686;NM_001127;NM_145730		22	1.83	1.95	0.753	0.413	0.0666	0.0508	0.451	0.679
cg00014748	6	58885263	R			6	0.428	0.152	0.334	0.27	0.669	0.879	0.739	0.787
cg00014754	8	143758813	F	NM_005672		8	-0.263	-0.112	-0.484	0.0977	0.792	0.911	0.628	0.922
cg00014786	7	6581470	R		chr7:6616918-6617277	7	3.94	2.78	2.4	1.67	8.03e-05	0.00547	0.0164	0.0954
cg00014830	17	75380328	F		chr17:77763364-77767356	17	1.61	1.62	1.05	0.113	0.108	0.106	0.292	0.91
cg00014837	12	6627518	R	NM_032489	chr12:6756001-6756679	12	2.24	1.7	0.85	1.27	0.0254	0.0899	0.395	0.204
cg00014900	1	44210998	R	NM_001039589;NM_001384	chr1:44440142-44441256	1	0.294	-0.145	0.742	-0.00751	0.768	0.885	0.458	0.994
cg00014986	17	77443031	R	NM_001002245;NM_016476;NM_001002248;NM_001002246;NM_001002244;NM_001002247;NM_016476;NM_001002249;NM_001002244;NM_005782	chr17:79848512-79849981	17	-1.4	-0.864	-0.308	-1.2	0.16	0.388	0.758	0.229
cg00014998	2	176723208	R	NM_014621;NR_029609	chr2:177014948-177015214	2	-0.543	-0.508	-0.667	0.195	0.587	0.611	0.505	0.845
cg00015121	14	23094473	R	NR_023314;NM_024328;NM_001126339	chr14:24025006-24025577	14	0.945	0.185	-0.226	1.6	0.344	0.853	0.821	0.11
cg00015261	16	34887498	F			16	0.128	0.198	0.0646	-0.0451	0.898	0.843	0.949	0.964
cg00015286	1	38885249	R			1	2.73	1.31	1.46	1.96	0.00629	0.189	0.143	0.0499
cg00015319	12	52787099	F	NR_026655	chr12:54500127-54501158	12	-3.02	-1.73	-1.41	-2.07	0.00252	0.0838	0.159	0.0389
cg00015373	9	133237109	F		chr9:134248688-134249160	9	3.71	3.02	2.08	1.3	0.000211	0.00251	0.0378	0.194
cg00015530	8	145124938	F	NM_032789	chr8:145047293-145052305	8	1.66	1.78	0.661	0.383	0.0962	0.0748	0.509	0.702
cg00015699	12	88837720	R			12	0.913	0.337	0.764	0.518	0.361	0.736	0.445	0.604
cg00016127	11	56067247	F	NM_001013356;NM_001005245		11	1.44	2.23	-0.231	0.324	0.151	0.0259	0.817	0.746
cg00016156	5	170747788	R	NM_002520;NM_199185;NM_001037738	chr5:170814447-170815655	5	-3.38	-2.14	-1.6	-2.07	0.000722	0.032	0.109	0.0381
cg00016238	1	242440688	R			1	3.54	2.41	1.5	2.16	0.000407	0.016	0.135	0.0311
cg00016255	17	38387454	F	NM_001142653;NM_001136042;NM_173079;NM_001142654	chr17:41132462-41133367	17	0.675	1.68	-0.893	0.195	0.499	0.0937	0.372	0.845
cg00016324	2	143940152	F	NM_018460		2	3.2	1.81	1.62	2.09	0.00138	0.0696	0.104	0.0368
cg00016439	18	53169648	F	NM_015879	chr18:55019707-55021605	18	3.5	2.29	2.27	1.53	0.000471	0.022	0.0232	0.125
cg00016481	8	77930908	R	NM_024721		8	-1.43	-1.33	-0.506	-0.601	0.152	0.185	0.613	0.548
cg00016522	X	149488534	F	NM_000252	chrX:149736720-149737756	23	2.37	0.871	1.75	1.55	0.0179	0.384	0.0795	0.122
cg00016718	6	49513449	R	NM_000255		6	3.79	2.82	1.56	2.1	0.000152	0.00474	0.119	0.0361
cg00016783	2	8854135	R	NM_020738		2	0.903	0.125	-0.742	2.04	0.367	0.9	0.458	0.041
cg00016802	6	7284454	F	NM_001170692;NM_205864;NM_001170693		6	2.21	1.79	0.775	1.19	0.0273	0.0727	0.439	0.235
cg00016814	7	145505959	R	NM_014141		7	4.44	2.86	2.99	1.89	9.15e-06	0.00427	0.00278	0.0585
cg00016892	19	46640493	F	NM_001130514	chr19:41945690-41945904	19	-3.02	-1.74	-0.818	-2.58	0.0025	0.0815	0.414	0.00998
cg00016913	17	24394018	R	NM_016518		17	-2.18	-1.48	0.323	-2.43	0.0291	0.139	0.747	0.0149
cg00016934	X	39920905	F	NM_001123384;NM_001123383	chrX:40034239-40036007	23	-2.19	-0.752	-1.54	-1.56	0.0288	0.452	0.123	0.12
cg00016968	1	113051971	R	NM_001042679;NM_175744;NM_001042678	chr1:113249342-113250198	1	0.854	0.878	1.12	-0.451	0.393	0.38	0.263	0.652
cg00016996	1	2323882	R	NM_007033	chr1:2333550-2334172	1	4.63	2.81	1.99	3.15	3.66e-06	0.00494	0.0468	0.00162
cg00017033	14	59628760	F	NM_022495;NM_022495	chr14:60558340-60559176	14	-1	1.01	-2.37	-0.644	0.315	0.312	0.0179	0.52
cg00017059	2	45650759	R	NM_018079		2	4.7	2.24	2.88	3.07	2.61e-06	0.0253	0.00393	0.00212
cg00017062	15	68456602	R			15	0.146	0.818	-0.264	-0.369	0.884	0.413	0.792	0.712
cg00017157	1	165393977	R			1	1.62	0.897	1.22	0.729	0.106	0.37	0.224	0.466
cg00017188	17	35629273	R	NM_133264	chr17:38375440-38375836	17	-1.67	-1.84	-0.527	-0.451	0.095	0.0656	0.598	0.652
cg00017203	8	145072021	F	NM_201378;NM_201384;NM_201382;NM_201381;NM_000445;NM_201380;NM_201383;NM_201379	chr8:144990270-145002135	8	-0.0159	0.0594	-0.818	0.631	0.987	0.953	0.414	0.528
cg00017271	17	73732338	R	NM_001012271;NM_001168;NM_001012270;NR_002219		17	-0.293	-0.317	-0.796	0.533	0.77	0.751	0.426	0.594
cg00017362	8	19756083	R			8	-0.274	0.172	-1.12	0.346	0.784	0.864	0.263	0.73
cg00017363	10	8317529	R			10	4.35	3.58	1.33	2.46	1.34e-05	0.00034	0.182	0.0137
cg00017429	14	97239913	R			14	0.649	0.739	-0.118	0.436	0.516	0.46	0.906	0.663
cg00017461	22	28993316	R	NM_020530		22	-1	0.0924	-0.796	-1.08	0.316	0.926	0.426	0.279
cg00017489	7	153214251	R	NM_001039350	chr7:153583317-153585666	7	-3.14	-1.7	-1.36	-2.34	0.0017	0.0887	0.175	0.0195
cg00017546	1	28532062	F	NM_017638;NM_001127350	chr1:28655365-28655667	1	2.08	1.34	0.57	1.62	0.0378	0.18	0.569	0.106
cg00017639	15	83239986	F	NM_004213;NM_201651		15	-1.04	-0.323	-0.14	-1.29	0.299	0.746	0.889	0.196
cg00017826	2	30498459	R			2	-1.15	-0.878	0.161	-1.17	0.251	0.38	0.872	0.241
cg00017842	2	119244891	R		chr2:119532065-119532315	2	1.22	1.5	-0.183	0.661	0.223	0.132	0.855	0.509
cg00017931	6	157852168	R	NM_153746;NM_024630		6	1.02	0.607	1.75	-0.451	0.308	0.544	0.0795	0.652
cg00017970	1	26360324	F	NM_024869	chr1:26487807-26488606	1	-1.09	-1	-0.646	-0.24	0.274	0.316	0.519	0.81
cg00018010	17	20046218	R	NM_001033554;NM_152904;NM_001033555;NM_001033553		17	-0.969	-0.574	-0.968	-0.188	0.333	0.566	0.333	0.851
cg00018044	18	17363494	R	NM_052911		18	1.12	1.12	0.409	0.383	0.261	0.265	0.683	0.702
cg00018128	2	161983992	F	NM_006593	chr2:162275161-162275596	2	-0.317	0.033	0.516	-1.02	0.751	0.974	0.606	0.307
cg00018181	7	101718454	F	NM_020979	chr7:101929503-101931089	7	1.31	0.238	0	1.97	0.189	0.812	1	0.0491
cg00018184	1	151786474	R	NM_002960		1	-2.36	-1.03	-1.9	-1.24	0.0182	0.303	0.0569	0.215
cg00018198	2	65150751	R	NM_015147		2	-0.108	0.528	0.387	-1.07	0.914	0.598	0.699	0.286
cg00018204	X	150879432	F	NM_004961;NR_029973		23	4.25	2.76	1.7	2.82	2.11e-05	0.0057	0.0891	0.00485
cg00018229	1	229180042	R	NM_001122835;NM_022786;NM_024525	chr1:231113871-231114873	1	0.963	0.772	0.0108	0.818	0.335	0.44	0.991	0.413
cg00018261	X	117841717	F	NM_173798	chrX:117957615-117957937	23	-0.396	-0.774	-0.231	0.331	0.692	0.439	0.817	0.741
cg00018539	7	2599215	R	NM_001100390;NM_152558	chr7:2632171-2632372	7	2.75	1.14	1.3	2.31	0.00599	0.254	0.193	0.0211
cg00018557	17	40594667	F	NM_144608	chr17:43238260-43239233	17	-1.65	0.0594	-1.57	-1.46	0.0981	0.953	0.116	0.143
cg00018606	2	208697670	F	NM_006891	chr2:208988834-208989269	2	-1.93	-1.5	-2.14	0.188	0.0539	0.132	0.0323	0.851
cg00018696	8	3033890	R	NM_033225		8	4.45	2.64	2.63	2.46	8.78e-06	0.0083	0.00866	0.014
cg00018739	12	123025443	F	NM_152437	chr12:124456573-124458728	12	3.3	2.86	2.3	0.593	0.000955	0.00427	0.0213	0.553
cg00018850	14	72136674	F			14	3.44	4.17	1.34	0.315	0.000578	3.04e-05	0.179	0.752
cg00018866	10	50013292	F	NM_001164484	chr10:50339890-50340178	10	4.35	2.85	2.42	2.26	1.36e-05	0.00436	0.0155	0.024
cg00018896	13	24569476	F	NM_030979	chr13:25670041-25670531	13	-1.43	-1.45	0.0646	-0.977	0.151	0.147	0.949	0.329
cg00019076	16	84228273	R	NM_001134473;NM_014615	chr16:85670134-85670349	16	1.15	1.74	0.0861	0.0676	0.251	0.0827	0.931	0.946
cg00019085	12	119418228	R	NM_003746;NM_001037495;NM_001037494	chr12:120933649-120934713	12	0.321	0.403	0.126	0.0153	0.748	0.687	0.9	0.988
cg00019118	12	131361591	F	NM_001122636;NR_024563	chr12:132853943-132854190	12	4.19	3.78	0.624	2.61	2.81e-05	0.000156	0.533	0.00914
cg00019151	1	171736772	R	NM_178527		1	4.45	3.11	2.56	2.04	8.48e-06	0.00188	0.0104	0.041
cg00019196	13	45324203	R	NM_198849		13	-0.344	-0.112	-0.484	-0.0376	0.731	0.911	0.628	0.97
cg00019275	19	39941057	R	NM_001007248		19	1.25	1.58	0.57	-0.03	0.213	0.115	0.569	0.976
cg00019308	1	232973527	R			1	2.71	1.43	0.925	2.28	0.00669	0.154	0.355	0.0224
cg00019366	12	129189319	R		chr12:130623142-130623492	12	4.5	2.88	1.92	2.91	6.93e-06	0.00393	0.0555	0.00356
cg00019463	15	57066995	R	NM_017610	chr15:59279741-59280720	15	-3.76	-1.29	-2.97	-2.39	0.000172	0.198	0.00298	0.0169
cg00019495	4	57242282	R	NM_139212;NM_139212;NM_032495;NM_001145460;NM_032495;NM_001145460		4	-1.91	-1.09	-1.7	-0.601	0.056	0.276	0.0891	0.548
cg00019511	14	100271041	F	NM_003836	chr14:101201559-101201763	14	2.29	1.66	1.37	0.946	0.0218	0.0963	0.172	0.344
cg00019654	14	81218042	R			14	2.02	0.752	0.925	1.82	0.043	0.452	0.355	0.0691
cg00019678	12	108638612	R	NM_032829	chr12:110151327-110152758	12	-1.91	-1.27	-1.34	-0.721	0.0567	0.205	0.179	0.471
cg00019759	1	210754465	R		chr1:212688031-212688448	1	2.92	1.37	0.258	3.28	0.00345	0.17	0.796	0.00103
cg00019826	4	1524278	R		chr4:1554465-1554678	4	3.13	2.63	1.54	1.21	0.00175	0.00863	0.124	0.227
cg00019838	16	6511084	R	NM_001142333;NM_018723		16	3.67	1.78	2.05	2.53	0.000246	0.0754	0.0399	0.0114
cg00019877	9	114813559	R	NM_001101338	chr9:115774295-115774615	9	-1.17	-1.19	-1.46	0.541	0.242	0.233	0.143	0.589
cg00019880	17	51187577	F	NM_021213;NM_001102402	chr17:53828422-53828738	17	2.39	1.7	0.452	1.88	0.0167	0.0887	0.651	0.0604
cg00019997	7	107812803	R	NM_001037132;NM_005010		7	3.77	3.15	1.04	2.19	0.000161	0.00161	0.297	0.0288
cg00020191	12	77782214	F	NM_001135805;NM_001135805;NM_005639		12	-4.83	-2.3	-2.98	-3.13	1.39e-06	0.0213	0.00288	0.00173
cg00020340	7	876914	R	NM_025154;NM_001130965		7	2.23	2.62	0.463	0.651	0.0255	0.0088	0.644	0.515
cg00020390	7	100514608	R	NM_030961		7	1.3	-0.0924	1.29	1.16	0.192	0.926	0.197	0.247
cg00020405	5	65475276	R	NM_001077199;NM_139168	chr5:65439836-65440764	5	-2.6	-1.91	-0.882	-1.65	0.00919	0.0565	0.378	0.0999
cg00020419	6	43381526	F	NM_206922	chr6:43276419-43276659	6	2.12	2.33	0.764	0.503	0.0337	0.0198	0.445	0.615
cg00020446	12	123151397	F			12	-0.533	-0.449	-0.495	0	0.594	0.654	0.621	1
cg00020474	1	8137550	F			1	-0.463	-0.429	-0.409	0.0225	0.644	0.668	0.683	0.982
cg00020533	6	35588894	F	NM_003322	chr6:35479388-35479678	6	3.5	2.28	0.979	2.67	0.000471	0.0224	0.328	0.00749
cg00020649	15	26015157	F	NM_000275	chr15:28339774-28342442	15	2.45	0.818	1.8	1.7	0.0144	0.413	0.0724	0.0896
cg00020778	12	108309528	R	NM_001101421		12	3.2	2.53	1.28	1.66	0.00138	0.0115	0.202	0.0978
cg00020794	16	87352071	R	NM_001142864	chr16:88821117-88821605	16	-3.46	-0.858	-1.53	-3.61	0.000532	0.391	0.127	0.000311
cg00020799	12	93089223	R	NM_005761		12	1.32	0.752	0.237	1.24	0.187	0.452	0.813	0.215
cg00020991	4	170167004	R	NM_032783	chr4:169930790-169931607	4	-1.32	-1.04	-1.01	-0.27	0.186	0.3	0.312	0.787
cg00021030	17	24249896	R	NM_004475;NM_144683	chr17:27224005-27224873	17	-1.97	-1.55	-1.52	-0.383	0.049	0.121	0.129	0.702
cg00021044	4	42011605	R			4	3.99	3.1	1.15	2.52	6.5e-05	0.00193	0.25	0.0119
cg00021108	14	92049779	F	NM_024832	chr14:92979726-92981228	14	-0.312	0.0198	-0.646	0.0225	0.755	0.984	0.519	0.982
cg00021123	1	16818036	F	NR_026752		1	0.158	0.627	-0.775	0.3	0.875	0.531	0.439	0.764
cg00021152	8	26423005	R	NM_007257		8	4.83	3.5	2.17	2.61	1.38e-06	0.00047	0.0298	0.00895
cg00021237	8	67688403	F	NM_001080416;NM_001144755	chr8:67524607-67526059	8	4.57	2.19	2.49	3.25	4.88e-06	0.0285	0.0129	0.00114
cg00021242	15	27560717	F	NM_015307		15	0.18	0.561	-0.441	0.113	0.857	0.575	0.659	0.91
cg00021256	2	219556617	R	NM_017521	chr2:219848919-219850541	2	-0.29	0.482	-0.172	-0.834	0.772	0.63	0.863	0.404
cg00021275	2	127858625	F		chr2:128145117-128145897	2	1.73	1.95	0.237	0.691	0.0845	0.0516	0.813	0.49
cg00021325	14	90364165	F			14	1.28	0.911	0.99	0.353	0.199	0.363	0.322	0.724
cg00021476	16	84217716	R	NM_001134473;NM_014615	chr16:85658742-85658998	16	-2.9	-1.83	-1.54	-1.65	0.00369	0.0666	0.124	0.0999
cg00021513	16	83772247	F			16	0.273	-0.647	-0.463	1.53	0.785	0.518	0.644	0.125
cg00021532	16	4264281	F	NM_003223	chr16:4321639-4324073	16	-2.84	-0.676	-0.958	-3.24	0.00451	0.499	0.338	0.00121
cg00021550	1	53981668	F		chr1:54203402-54205310	1	3.27	1.89	1.64	2.12	0.00109	0.0591	0.102	0.0341
cg00021600	16	82561108	F	NM_019065	chr16:84001805-84002011	16	3.25	2.15	2.25	1.28	0.00114	0.0313	0.0244	0.199
cg00021762	22	26162684	F		chr22:27834425-27834630	22	3.6	2.65	1.69	1.85	0.00032	0.00814	0.0912	0.0649
cg00021855	8	144762099	F	NM_023078	chr8:144691400-144692269	8	1.18	-0.0726	0.151	1.92	0.239	0.942	0.88	0.0545
cg00021978	8	105546093	R	NM_001385	chr8:105478672-105479340	8	4.19	3.07	2.04	2.1	2.83e-05	0.00217	0.0409	0.0361
cg00022024	9	137940145	F	NM_015447	chr9:138798462-138800325	9	1.17	0.66	0.217	1.1	0.241	0.509	0.828	0.27
cg00022054	1	47949848	R		chr1:48174494-48176519	1	0.78	1	1.04	-0.644	0.435	0.316	0.297	0.52
cg00022076	16	66851491	R	NM_012320		16	1.14	2.01	-1.16	0.864	0.255	0.0442	0.245	0.388
cg00022235	16	11672348	R	NM_003498	chr16:11762563-11763246	16	4.34	2.53	0.979	3.83	1.44e-05	0.0113	0.328	0.000128
cg00022259	12	131895357	F	NM_005895		12	4.23	3.01	2.15	2.13	2.31e-05	0.00262	0.0314	0.0329
cg00022262	12	131469637	F		chr12:132956310-132956928	12	-1.85	-0.904	-1.4	-0.946	0.0649	0.366	0.162	0.344
cg00022594	19	15373550	R	NM_014371	chr19:15512025-15512393	19	2.69	2.46	2.05	0.18	0.00722	0.0138	0.0399	0.857
cg00022688	10	114126001	R	NM_016234;NM_203379;NM_016234;NM_203380		10	-1.88	-0.508	0.516	-3.09	0.0602	0.611	0.606	0.00197
cg00022866	11	63865016	F	NM_032251	chr11:64109822-64110228	11	-1	-1.05	0.14	-0.729	0.317	0.293	0.889	0.466
cg00022871	17	41240138	R	NM_001145148;NM_004382;NM_001145147;NM_001145146		17	-0.725	0.0792	-0.43	-0.924	0.468	0.937	0.667	0.356
cg00022900	8	94212710	R			8	2.29	0.963	1.43	1.6	0.0222	0.335	0.152	0.11
cg00022911	19	19233392	F	NM_023002	chr19:19371675-19372393	19	-1.87	-0.125	-1.25	-1.92	0.062	0.9	0.212	0.0554
cg00022966	1	204014548	F		chr1:205743900-205744668	1	4.2	3.55	1.16	2.39	2.69e-05	0.000385	0.245	0.0169
cg00022997	6	31758787	F		chr6:31650648-31651292	6	-0.665	-0.0201	0.861	-1.86	0.506	0.984	0.389	0.0627
cg00023001	17	53293747	R		chr17:55939088-55939591	17	1.33	1.64	0.689	-0.0451	0.182	0.102	0.491	0.964
cg00023024	1	23393859	F	NM_000864		1	1.58	0.251	1.51	1.07	0.115	0.802	0.132	0.283
cg00023168	19	49360908	R	NM_001032374;NM_001032373;NM_001032372;NM_015919;NM_001146220		19	-3.83	-2.57	-2.15	-1.91	0.000127	0.0101	0.0314	0.0564
cg00023174	19	12063386	R	NR_027049	chr19:12203028-12203503	19	2.44	1.81	1.95	0.526	0.0149	0.0706	0.0515	0.599
cg00023185	8	65652493	R	NR_015374	chr8:65491083-65491319	8	-0.0682	-0.125	-0.958	0.856	0.946	0.9	0.338	0.392
cg00023321	6	31619342	F	NM_004640;NM_080598	chr6:31509668-31509896	6	2.9	1.52	0.785	2.62	0.00378	0.129	0.432	0.00875
cg00023415	X	48320096	F	NM_006743	chrX:48432815-48433322	23	1.76	1.54	0.699	0.759	0.079	0.124	0.484	0.448
cg00023464	13	110065668	R	NM_018210	chr13:111267780-111268778	13	0.503	-0.0264	0.0968	0.789	0.615	0.979	0.923	0.43
cg00023507	6	33384443	R	NM_172209;NM_003190;NM_172208		6	-0.0155	-0.343	-0.183	0.488	0.988	0.732	0.855	0.625
cg00023673	16	85313133	F			16	0.695	1.64	-0.176	-0.375	0.487	0.1	0.86	0.707
cg00023702	1	114298294	F	NM_198269;NM_198268;NM_152696;NM_181358		1	2.78	2.26	1.19	1.3	0.00543	0.0236	0.232	0.194
cg00023726	1	2829795	F			1	1.27	1.22	1.13	-0.12	0.206	0.222	0.259	0.904
cg00023750	16	29118785	F			16	2.65	2.37	1.75	0.473	0.00813	0.0178	0.0795	0.636
cg00023808	7	101731276	F	NM_020979	chr7:101943785-101944557	7	2.78	1.69	1.78	1.37	0.00548	0.0912	0.0759	0.169
cg00023919	11	66595767	F	NM_014578	chr11:66838918-66839192	11	0.291	-0.515	0.652	0.451	0.771	0.607	0.514	0.652
cg00024046	2	20261839	F			2	-0.138	-0.238	-0.43	0.391	0.89	0.812	0.667	0.696
cg00024192	2	179536786	F			2	-0.723	-1.27	1.23	-0.984	0.469	0.203	0.22	0.325
cg00024247	13	92542609	R			13	1.58	1.43	1.47	-0.113	0.114	0.152	0.14	0.91
cg00024416	22	22570387	F		chr22:24236257-24237539	22	-2.01	-0.95	-1.64	-0.969	0.0443	0.342	0.102	0.333
cg00024443	16	21476974	R			16	-2.48	-1.17	-2	-1.2	0.0132	0.24	0.0454	0.229
cg00024471	3	190175241	F			3	0.124	-0.29	1.31	-0.646	0.901	0.772	0.189	0.518
cg00024494	16	71654343	R		chr16:73096888-73097115	16	-0.276	1.29	-1.75	-0.255	0.783	0.196	0.0795	0.798
cg00024516	4	123725644	F			4	-0.872	-0.739	-1.12	0.278	0.383	0.46	0.263	0.781
cg00024967	3	170860512	R	NM_004991	chr3:169379437-169381056	3	-0.132	0.825	-0.947	-0.24	0.895	0.409	0.344	0.81
cg00024989	19	17763242	F		chr19:17905579-17906317	19	-2.04	-0.798	-1.57	-1.23	0.0413	0.425	0.116	0.218
cg00025044	10	50386484	R	NM_000124		10	1.96	1.67	0.721	0.939	0.0505	0.095	0.471	0.348
cg00025185	15	97368382	R	NM_001167902;NM_001167902		15	2.74	2.43	2.51	-0.0901	0.00611	0.0152	0.0122	0.928
cg00025211	1	144299984	R	NM_001012758	chr1:145589135-145589535	1	-0.431	1.21	-0.215	-1.79	0.666	0.225	0.83	0.0738
cg00025331	2	144863820	R	NM_014795;NM_001171653	chr2:145147123-145147476	2	2.05	2.12	0.828	0.533	0.0404	0.0336	0.407	0.594
cg00025347	8	42479149	F	NM_006749		8	3.33	2.57	2.16	1.05	0.000872	0.0101	0.0306	0.293
cg00025357	1	17450042	R	NM_016233		1	-0.477	0.917	0.0108	-1.76	0.633	0.359	0.991	0.0788
cg00025405	5	2188863	R		chr5:2136797-2137305	5	2.59	2.2	0.667	1.5	0.00961	0.0275	0.505	0.133
cg00025436	12	54946759	F	NM_001099337;NM_144576	chr12:56660442-56661131	12	-3.87	-2.07	-1.87	-2.73	0.000109	0.0383	0.0612	0.00625
cg00025439	16	86413951	R			16	2.49	1.73	1.34	1.22	0.0129	0.0838	0.179	0.221
cg00025496	17	1004093	F	NM_021962;NM_001159746		17	-1.08	-1.28	-0.71	0.128	0.281	0.201	0.478	0.898
cg00025591	21	46850471	F	NM_006272		21	-1.28	-0.706	-0.839	-0.691	0.2	0.48	0.401	0.49
cg00025643	1	37677281	R			1	0.871	0.152	1.1	0.346	0.384	0.879	0.272	0.73
cg00025647	3	148559817	F		chr3:147077115-147077672	3	-1.1	-1.06	0.226	-0.969	0.27	0.291	0.821	0.333
cg00025680	2	45034064	F		chr2:45181890-45183111	2	0.226	-0.0528	0.452	0.0376	0.821	0.958	0.651	0.97
cg00025823	17	41264932	F	NM_001145148;NM_004382;NM_001145147;NM_001145146		17	-2.55	-2.2	-1.15	-1.02	0.0107	0.028	0.25	0.307
cg00025972	4	187999306	R			4	4.01	1.44	3.13	2.52	6.07e-05	0.15	0.00174	0.0119
cg00025991	10	726625	R	NM_014974	chr10:734707-735606	10	1.71	1.29	0.775	0.879	0.0865	0.198	0.439	0.379
cg00026033	12	54700757	F	NM_022465		12	-4.06	-3.06	-1.67	-2.22	4.98e-05	0.00225	0.0954	0.0267
cg00026075	3	173948440	F		chr3:172468372-172468845	3	2.25	1.66	0.538	1.62	0.0242	0.0977	0.591	0.106
cg00026119	12	122836392	F	NM_207437	chr12:124272128-124272585	12	-0.024	1.06	0.613	-1.67	0.981	0.291	0.54	0.0954
cg00026141	3	193061952	R		chr3:191580928-191581300	3	2.65	2.01	1.5	1.07	0.00803	0.0442	0.135	0.283
cg00026186	X	48252174	R	NM_203476;NM_203473;NM_022825;NM_203474;NM_203475	chrX:48367165-48367742	23	1.27	1.34	-0.11	0.856	0.203	0.18	0.912	0.392
cg00026290	4	10295652	F	NM_052964		4	0.739	0.686	2.51	-1.67	0.46	0.493	0.0122	0.0954
cg00026327	17	76670778	F	NM_017450;NM_006340;NM_001144888;NM_017451	chr17:79051892-79052534	17	0.49	0.686	-0.882	0.894	0.624	0.493	0.378	0.371
cg00026346	15	40054567	R		chr15:42264156-42264861	15	4.59	2.8	3.25	1.98	4.53e-06	0.00515	0.00116	0.0481
cg00026362	6	43966719	F	NR_024478		6	1.89	1.17	0.915	1.17	0.059	0.243	0.36	0.241
cg00026412	10	61729900	R	NM_020987		10	-2.53	-1.1	-2.54	-0.901	0.0113	0.273	0.0111	0.367
cg00026455	16	88560237	F	NM_207514	chr16:90030509-90030740	16	-0.755	-0.0066	-1.17	-0.233	0.45	0.995	0.241	0.816
cg00026457	1	198383359	R	NM_205860;NM_003822	chr1:200116696-200117204	1	3.4	2.82	2.07	1.01	0.000671	0.00484	0.0389	0.314
cg00026474	8	134654682	F	NM_173344;NM_003033	chr8:134581969-134584875	8	2.3	0.495	-0.581	3.87	0.0216	0.621	0.561	0.000109
cg00026553	15	88363843	R	NM_198526		15	0.851	0.422	0.253	0.774	0.395	0.673	0.8	0.439
cg00026603	13	72039878	F			13	3.29	1.83	1.74	2.13	0.000995	0.0666	0.0825	0.0335
cg00026703	15	94671034	R	NM_001145155	chr15:96873408-96877721	15	-1.53	-0.62	-0.409	-1.57	0.127	0.535	0.683	0.116
cg00026776	6	32386631	R	NM_006781		6	1.99	2.76	0.247	0.293	0.0465	0.00581	0.805	0.77
cg00026803	1	158321877	F	NM_004983	chr1:160053721-160054738	1	-0.0702	-0.337	-0.646	0.796	0.944	0.736	0.519	0.426
cg00026857	12	6490064	R	NM_014865		12	2.05	1.87	1.84	-0.0751	0.0401	0.0618	0.066	0.94
cg00026909	1	57861589	F	NM_021080		1	1.06	0.838	-0.0108	0.931	0.289	0.402	0.991	0.352
cg00026919	13	39124031	R		chr13:40229743-40230181	13	3.15	2.29	1.58	1.55	0.00163	0.022	0.114	0.12
cg00026974	17	39653677	R	NM_001076683;NM_001076684;NM_001076683	chr17:42295861-42299719	17	2.57	2.28	0.409	1.62	0.0102	0.0224	0.683	0.106
cg00027081	2	3304165	F	NM_003310	chr2:3321063-3321293	2	4.02	2.59	1.24	3.02	5.75e-05	0.00969	0.216	0.00253
cg00027114	7	42707011	F			7	0.576	1.44	-0.129	-0.398	0.564	0.15	0.897	0.691
cg00027120	7	142590954	R	NM_176881		7	3.17	2.69	1.82	0.977	0.00151	0.00724	0.069	0.329
cg00027155	16	11006700	F	NM_015226		16	0.721	0.567	0.861	-0.128	0.471	0.57	0.389	0.898
cg00027162	7	150718659	F	NM_198285		7	-0.196	0.304	-0.0215	-0.623	0.845	0.761	0.983	0.533
cg00027232	2	85400742	F	NM_006464		2	-3.12	-0.158	-2.39	-2.98	0.00184	0.874	0.0169	0.00286
cg00027454	X	46625229	F	NM_006915		23	4.77	2.86	2.95	2.49	1.81e-06	0.00419	0.0032	0.0126
cg00027466	1	154535672	F	NM_001004319;NM_001004319		1	3.06	1.79	2.78	0.864	0.00223	0.0737	0.00551	0.388
cg00027570	1	117108192	R	NM_001767		1	4.63	2.66	2.17	3.15	3.63e-06	0.00783	0.0298	0.00165
cg00027586	18	74249664	R		chr18:76150398-76151531	18	-1.69	-0.132	0.398	-3.06	0.0904	0.895	0.691	0.00218
cg00027637	1	224967144	F	NM_002221		1	3.2	1.89	1.72	1.92	0.0014	0.0583	0.0852	0.0554
cg00027650	15	55297867	F	NM_207040;NM_003205;NM_207037;NM_207036;NM_207038		15	-2.21	-1.78	-1.12	-0.909	0.0268	0.0748	0.263	0.363
cg00027669	17	34636225	R	NM_198993	chr17:37380953-37382363	17	-1.45	-1.08	-0.968	-0.481	0.147	0.282	0.333	0.631
cg00027674	11	87548545	R	NM_022337	chr11:87908243-87908614	11	-0.936	-0.0528	-0.194	-1.35	0.349	0.958	0.846	0.176
cg00027729	16	31193274	F	NM_001145808;NM_000632		16	-3	-1.42	-0.968	-2.74	0.00268	0.156	0.333	0.00611
cg00027995	15	37675385	F	NM_003246		15	-0.547	0.0924	0.979	-1.88	0.584	0.926	0.328	0.0604
cg00028013	15	72005750	R	NM_005576	chr15:74218696-74220373	15	-0.733	-0.198	0.118	-1.13	0.464	0.843	0.906	0.257
cg00028014	2	201309651	F			2	-0.074	-0.963	0.355	0.556	0.941	0.335	0.723	0.578
cg00028022	1	245051196	R			1	-0.862	0.0924	-0.161	-1.4	0.389	0.926	0.872	0.16
cg00028034	20	30242968	F	NR_002781	chr20:30777756-30778329	20	-2.86	-2.15	-1.34	-1.41	0.00427	0.0315	0.179	0.158
cg00028056	2	220115415	F	NM_024536	chr2:220407698-220409048	2	2.72	1.85	1.65	1.22	0.00658	0.0637	0.0997	0.224
cg00028135	3	115826363	F	NM_001164345;NM_001164346;NM_001164347;NM_001164344;NM_015642;NM_001164343		3	-2.17	-1.15	-0.807	-1.76	0.0298	0.248	0.42	0.0788
cg00028211	2	44882306	F		chr2:45028955-45029318	2	0.888	0.0528	1.82	-0.158	0.374	0.958	0.069	0.875
cg00028232	4	1511274	R		chr4:1541591-1541868	4	0.384	0.746	-0.42	0.248	0.701	0.456	0.675	0.804
cg00028251	6	119439101	R	NM_001100411;NM_024581	chr6:119399091-119400223	6	2.59	2.61	1.53	0.331	0.0095	0.00897	0.127	0.741
cg00028299	8	59333522	R			8	1.27	1.68	1.33	-0.766	0.204	0.0924	0.182	0.444
cg00028308	12	52377021	F		chr12:54089211-54089413	12	-0.128	-0.37	0.495	-0.27	0.898	0.712	0.621	0.787
cg00028318	6	29678718	F	NM_021904;NM_021903;NM_001470		6	1.25	0.99	0.0323	1.06	0.211	0.322	0.974	0.29
cg00028336	4	186978782	F	NM_021069		4	-3.18	-3.11	-1.47	-0.849	0.00149	0.00188	0.14	0.396
cg00028338	4	1922521	F	NM_001042424;NM_133330;NM_133331;NM_133335		4	0.437	0.403	0.366	0	0.662	0.687	0.715	1
cg00028429	15	99091002	R			15	-1.54	-0.904	-0.656	-1.09	0.123	0.366	0.512	0.276
cg00028431	8	125633553	F	NM_014751		8	0.508	0.713	-0.323	0.406	0.611	0.476	0.747	0.685
cg00028507	1	2907966	R		chr1:2918497-2918753	1	1.72	1.59	0.968	0.406	0.0855	0.112	0.333	0.685
cg00028678	2	131390645	R	NM_032995;NM_015320	chr2:131673686-131674150	2	0.0255	0.831	0.194	-0.984	0.98	0.406	0.846	0.325
cg00028844	20	43371598	R	NM_003833;NM_014276;NM_030590;NM_030592	chr20:43940306-43941111	20	-0.117	0.00335	0.0968	-0.285	0.907	0.997	0.923	0.775
cg00028929	12	51194745	F	NM_000424		12	0.873	1.39	1.11	-0.939	0.383	0.164	0.268	0.348
cg00028935	3	148597096	R	NM_001168378;NM_032153;NM_001168379	chr3:147113608-147114479	3	-0.0674	0.436	0.753	-1.22	0.946	0.663	0.451	0.221
cg00028993	19	52939526	R	NM_015710	chr19:48248729-48249110	19	2.24	1.48	0.258	2.01	0.0251	0.138	0.796	0.0441
cg00029052	16	19473719	F	NM_020314	chr16:19566486-19567388	16	1.94	2.1	1.04	0.173	0.0529	0.0353	0.297	0.863
cg00029161	7	75106218	R	NM_005338	chr7:75268004-75268871	7	-2.66	-1.25	-2.41	-1.07	0.00782	0.212	0.016	0.283
cg00029246	7	136873957	F	NM_004717		7	0.875	1.02	0.0323	0.398	0.381	0.31	0.974	0.691
cg00029284	12	110215586	R	NM_015267		12	-1.73	-1.31	-0.635	-0.999	0.0839	0.189	0.526	0.318
cg00029521	6	39380612	R	NM_031460;NM_001135111	chr6:39271516-39271758	6	-0.0439	0.304	0.893	-1.17	0.965	0.761	0.372	0.241
cg00029619	6	17868971	R	NM_001105568		6	3.99	2.71	2.32	1.88	6.66e-05	0.00669	0.0202	0.0605
cg00029640	19	40461981	R	NM_003367;NM_207291	chr19:35769543-35770197	19	1.73	1.23	0.387	1.31	0.083	0.217	0.699	0.191
cg00029821	6	147416186	F			6	4.1	3.04	2.01	2.01	4.07e-05	0.00235	0.0442	0.0449
cg00029825	16	31407940	R	NM_003041	chr16:31498650-31500564	16	0.129	0.0594	-0.463	0.563	0.897	0.953	0.644	0.573
cg00029826	14	19871299	F	NM_182849;NM_021178		14	-3.97	-2.51	-1.81	-2.5	7.24e-05	0.0119	0.0707	0.0124
cg00029831	8	145624157	R	NM_183057;NM_016208	chr8:145653335-145654145	8	-1.53	-1.49	-1.05	-0.105	0.127	0.136	0.292	0.916
cg00029922	2	191738832	R			2	-1.7	-1.29	-0.689	-0.916	0.09	0.196	0.491	0.359
cg00029928	6	133122131	R	NM_004665;NM_078488		6	1.14	1.22	1.51	-0.661	0.254	0.222	0.132	0.509
cg00029931	X	100532397	F	NM_021029	chrX:100645780-100646107	23	-1.42	0.0594	-1.8	-0.879	0.154	0.953	0.0724	0.379
cg00029973	17	3448490	F	NM_018727;NM_080704		17	2.65	2.76	0.882	0.841	0.00799	0.0057	0.378	0.4
cg00029979	17	46382094	R			17	-0.196	0.31	0.0215	-0.669	0.845	0.756	0.983	0.504
cg00030005	7	154822626	F		chr7:155130499-155131042	7	1.27	1.53	0.172	0.413	0.203	0.126	0.863	0.679
cg00030047	1	6191377	R	NM_207396	chr1:6268820-6269588	1	1.87	0.363	-0.258	3	0.0612	0.717	0.796	0.00266
cg00030117	2	119696719	F	NM_001008410;NM_018234;NM_182915	chr2:119981079-119981818	2	1.84	0.759	0.785	1.63	0.0654	0.448	0.432	0.103
cg00030125	X	125127084	R	NM_001013628	chrX:125299245-125300436	23	2.54	1.54	0.925	1.89	0.011	0.124	0.355	0.0594
cg00030296	17	72830327	R	NM_001113492;NM_001113491;NM_006640		17	2.39	0.534	0.506	3.03	0.0167	0.593	0.613	0.00241
cg00030420	5	140663956	F	NM_031947	chr5:140683195-140683773	5	-2.19	-1.45	-0.57	-1.7	0.0282	0.147	0.569	0.0896
cg00030422	3	38055708	F	NM_007335;NM_007337;NM_007337;NM_007335	chr3:38080628-38081187	3	2.59	1.6	1.3	1.58	0.00949	0.11	0.193	0.115
cg00030427	6	169304465	R			6	-3	-1.06	-0.129	-3.85	0.00268	0.291	0.897	0.000116
cg00030432	7	99866910	F	NM_019606	chr7:100025804-100028002	7	0.272	0.64	-0.0323	-0.173	0.785	0.522	0.974	0.863
cg00030476	1	145108659	F	NM_005399	chr1:146643470-146644501	1	4.64	3.15	2.94	1.98	3.45e-06	0.00161	0.00331	0.0474
cg00030501	1	221248096	R			1	2.04	1.94	1.58	0.0526	0.0409	0.0524	0.114	0.958
cg00030523	12	96409484	F	NR_024037;NR_031653		12	3.42	3.5	1.43	0.901	0.000619	0.00047	0.152	0.367
cg00030588	16	85658312	F			16	0.218	0.323	0.936	-0.789	0.827	0.746	0.349	0.43
cg00030604	1	2369691	R			1	0.34	-0.693	1.17	0.255	0.734	0.488	0.241	0.798
cg00030627	10	131701595	R		chr10:131813042-131813277	10	2.81	1.23	1.54	2.12	0.00491	0.22	0.124	0.0341
cg00030682	16	16083103	R	NM_019862;NM_019898;NM_019899;NM_004996;NM_019900		16	3.27	1.87	1.99	1.82	0.00109	0.0609	0.0465	0.0691
cg00030774	15	27219435	R	NM_015307		15	0.869	0.831	-0.258	0.834	0.385	0.406	0.796	0.404
cg00030807	8	1773479	R	NM_014629		8	2.05	1.36	0.732	1.41	0.0401	0.174	0.464	0.158
cg00030816	1	144218861	R	NM_005105	chr1:145507588-145507931	1	-3.05	-1.26	-1.5	-2.52	0.00228	0.208	0.135	0.0116
cg00030909	17	44467295	F	NM_006546;NM_001160423	chr17:47113256-47113490	17	3.74	2.24	0.893	3.2	0.000187	0.0253	0.372	0.00137
cg00031013	17	7698658	R	NM_001080424;NM_203411	chr17:7758607-7758980	17	-0.512	0.772	-0.646	-1.09	0.609	0.44	0.519	0.276
cg00031063	1	17176339	R	NM_017459;NM_001135248;NM_002403;NM_001135247	chr1:17306551-17307363	1	1.28	0.462	1.55	0.315	0.201	0.644	0.121	0.752
cg00031105	6	33274095	R	NM_021976	chr6:33167885-33168715	6	2.7	1.99	0.237	2.28	0.00694	0.0461	0.813	0.0224
cg00031162	17	7394101	R	NM_003809;NM_172089	chr17:7452150-7452645	17	0.804	1.29	-1.46	1.31	0.422	0.196	0.143	0.191
cg00031187	12	31414264	R			12	-2.88	-0.864	-1.47	-2.66	0.004	0.387	0.14	0.00783
cg00031235	X	49011763	F	NM_033215	chrX:49125645-49127200	23	2.29	1.62	0.452	1.8	0.0219	0.106	0.651	0.0726
cg00031256	6	2787254	R	NM_030666	chr6:2841810-2842273	6	1.96	1.17	0.463	1.69	0.05	0.243	0.644	0.091
cg00031277	4	102162466	F			4	1.43	1.56	-0.0215	0.811	0.153	0.118	0.983	0.417
cg00031303	3	197165797	F		chr3:195681288-195681563	3	-1.37	-1.15	-0.991	-0.24	0.172	0.248	0.322	0.81
cg00031346	6	168221368	F	NM_024919	chr6:168479566-168479809	6	1.81	2.5	1.84	-1.14	0.0698	0.0124	0.0658	0.254
cg00031402	10	73282160	F	NM_002778;NM_001042465;NM_001042466	chr10:73610661-73611145	10	3.54	2.43	1.31	2.3	0.000399	0.0149	0.189	0.0215
cg00031443	19	7505076	R	NM_006702;NM_001166111;NM_006702;NM_001166112;NM_001166113	chr19:7598413-7601008	19	-1.17	-1.12	-0.14	-0.699	0.24	0.262	0.889	0.485
cg00031476	2	27967748	R	NM_199193;NM_022128;NR_028308;NM_199192;NM_199194;NM_199191;NM_004899	chr2:28113060-28113764	2	-4.15	-2.4	-1.95	-2.8	3.37e-05	0.0166	0.0515	0.00508
cg00031491	6	31945418	R	NM_025257		6	-1.8	-1.56	0.0323	-1.45	0.0717	0.118	0.974	0.147
cg00031556	12	11399316	R	NM_005039;NM_199354;NM_199353		12	1.76	2.07	1.09	-0.128	0.0785	0.0383	0.277	0.898
cg00031708	7	23017886	R	NM_032581	chr7:23052971-23054002	7	-2.11	-1.58	-1.11	-0.946	0.0352	0.115	0.268	0.344
cg00031722	8	57523817	R		chr8:57358126-57359415	8	3.49	1.81	1.95	2.29	0.000486	0.0696	0.0515	0.022
cg00031973	7	47750373	F			7	-0.0208	-0.376	0.204	0.173	0.983	0.707	0.838	0.863
cg00032192	19	12679196	F	NR_002751;NM_001136195;NM_013433;NM_001136196		19	-0.0955	0.66	-0.495	-0.406	0.924	0.509	0.621	0.685
cg00032205	8	98359548	F	NM_033512	chr8:98289604-98290404	8	2.39	1.29	0.409	2.34	0.0167	0.196	0.683	0.0192
cg00032246	17	30938066	F	NM_001030006;NM_001282		17	-1.7	-1.58	-1.12	-0.248	0.0892	0.115	0.261	0.804
cg00032308	6	123149290	F		chr6:123110288-123110878	6	2.08	1.81	0.71	1.01	0.0376	0.0696	0.478	0.314
cg00032366	19	5643159	R	NM_004793	chr19:5690127-5692213	19	-1.16	-1.36	-1.13	0.443	0.247	0.174	0.259	0.658
cg00032490	12	129968302	R			12	3.32	1.8	1.66	2.28	0.000887	0.0716	0.0975	0.0224
cg00032609	20	57040002	R	NM_001001977;NM_006886	chr20:57607045-57607782	20	-0.6	-0.924	0.882	-0.834	0.549	0.356	0.378	0.404
cg00032643	1	3690540	F	NM_020710	chr1:3703672-3703908	1	3.55	1.89	0.947	3.21	0.000379	0.0591	0.344	0.00134
cg00032664	3	126720128	R	NM_003794	chr3:125238496-125239201	3	0.927	0.911	0.409	0.263	0.354	0.363	0.683	0.793
cg00032666	X	149364056	R	NM_005491		23	2.06	1.55	1.26	0.759	0.0397	0.121	0.208	0.448
cg00032701	19	7817195	R	NM_145245;NM_001159944	chr19:7912629-7912895	19	-1.42	-0.983	-1.14	-0.377	0.155	0.326	0.252	0.706
cg00032756	12	43555266	F	NM_001145110;NM_001145107;NM_006159;NM_001145108;NM_001145109	chr12:45269830-45270835	12	-0.352	0.495	0.215	-1.29	0.725	0.621	0.83	0.196
cg00032852	7	132417672	F	NM_017812	chr7:132766509-132767096	7	-3.43	-1.87	-1.51	-2.52	0.000607	0.0618	0.132	0.0116
cg00032879	1	2294124	R	NM_024848	chr1:2304159-2304376	1	-2.05	-1.66	-0.753	-1.08	0.04	0.0963	0.451	0.279
cg00032884	2	48394175	R	NM_002158	chr2:48541252-48542587	2	2.72	2.57	1.11	0.962	0.00644	0.0101	0.268	0.336
cg00032912	15	94688533	F		chr15:96887415-96887616	15	0.722	-0.403	0.753	0.969	0.47	0.687	0.451	0.333
cg00032959	16	69884380	F		chr16:71323115-71323514	16	2.14	0.0396	2.05	1.76	0.0322	0.968	0.0399	0.0788
cg00033102	1	28434582	R	NM_016311;NM_178190;NM_178191	chr1:28562510-28562976	1	0.351	1.43	0.463	-1.28	0.726	0.154	0.644	0.199
cg00033127	1	98900034	R	NM_152238;NM_152238;NM_015976	chr1:99126872-99127711	1	0.308	0.515	-0.441	0.376	0.758	0.607	0.659	0.707
cg00033155	2	110282707	F	NM_001128179;NM_207181;NM_000272;NM_001128178		2	-2.47	-1.23	-1.03	-1.99	0.0134	0.22	0.302	0.0465
cg00033165	4	170188689	R			4	3.63	2.12	2.44	1.79	0.00028	0.0342	0.0146	0.0738
cg00033209	16	3451788	F	NM_001083601;NM_001083600;NM_024845	chr16:3507545-3508606	16	2.45	1.83	1.23	1.16	0.0144	0.0676	0.22	0.247
cg00033213	8	144470710	R	NM_052963	chr8:144399189-144399391	8	-0.496	0.0132	-0.667	-0.263	0.62	0.989	0.505	0.793
cg00033304	3	186785386	F	NM_021627	chr3:185303822-185304497	3	1.34	0.944	0.473	0.871	0.18	0.345	0.636	0.384
cg00033334	12	122443273	F	NM_020382	chr12:123873794-123874597	12	1.94	1.63	0.301	1.32	0.0524	0.103	0.763	0.186
cg00033490	7	86865823	F	NM_021151;NM_001143935		7	1.75	0.31	1.23	1.55	0.0795	0.756	0.22	0.12
cg00033551	16	4678569	R	NM_001142291;NM_015246;NM_001142290;NM_001142289		16	-0.755	-0.785	-1.04	0.461	0.45	0.432	0.297	0.645
cg00033584	3	44775753	F	NM_020696	chr3:44802852-44803618	3	1.37	1.36	0.506	0.466	0.17	0.174	0.613	0.641
cg00033666	15	94688047	R		chr15:96887415-96887616	15	-0.813	-1.11	0.28	-0.473	0.416	0.268	0.78	0.636
cg00033703	15	61353308	R		chr15:63569296-63570100	15	2.75	2.2	1.94	0.654	0.00599	0.0275	0.0528	0.513
cg00033773	19	12640366	R	NM_032332;NM_001099737;NM_016145;NR_029375	chr19:12779795-12781094	19	-0.515	0.488	-0.473	-0.954	0.607	0.625	0.636	0.34
cg00033806	8	143354020	F	NM_145003	chr8:143359844-143360110	8	-0.168	-0.125	-1.18	0.886	0.866	0.9	0.237	0.375
cg00033834	10	134868834	F	NM_152643	chr10:135018677-135019084	10	0.501	0.614	0.129	0.0977	0.616	0.539	0.897	0.922
cg00033909	7	9641427	F	NR_002790		7	2.95	2.94	1.16	0.916	0.00323	0.00331	0.245	0.359
cg00033915	19	7410569	R	NM_015318;NM_001130955	chr19:7504923-7505186	19	4.12	2.42	2.65	2.13	3.71e-05	0.0157	0.00813	0.0334
cg00034003	16	87306647	R	NM_001012759;NM_001012762	chr16:88781806-88782517	16	-2.12	-0.0462	-1.48	-2.21	0.0344	0.963	0.138	0.0272
cg00034076	8	85258592	F	NM_173848;NM_001100391;NM_001100392;NM_001100393;NM_173848	chr8:85096759-85097247	8	0.916	0.383	0.204	0.969	0.359	0.702	0.838	0.333
cg00034101	1	39871182	R	NM_014571		1	1.12	0.686	0.904	0.383	0.263	0.493	0.366	0.702
cg00034154	19	10198163	F	NM_004230	chr19:10334618-10335511	19	-0.752	0.033	0.409	-1.66	0.452	0.974	0.683	0.0969
cg00034336	2	8601577	F			2	0.297	0.403	1.42	-1.16	0.767	0.687	0.156	0.244
cg00034407	6	62342258	F			6	1.85	1.31	1.31	0.616	0.0642	0.191	0.189	0.538
cg00034468	1	227634700	R	NM_001100	chr1:229567206-229570684	1	2.49	1.35	1.31	1.65	0.0126	0.176	0.189	0.0984
cg00034559	2	39745628	F	NM_152390;NM_001167959	chr2:39893121-39893496	2	1.62	0.66	-0.473	2.46	0.105	0.509	0.636	0.0137
cg00034574	20	61867792	F	NM_025224	chr20:62398409-62398990	20	3.34	1.52	2.87	1.54	0.000827	0.129	0.00407	0.124
cg00034604	8	54950138	F	NM_170587	chr8:54789581-54790665	8	2.12	2.1	1.39	0.18	0.0343	0.0359	0.165	0.857
cg00034611	16	87756770	F	NR_024347	chr16:89232410-89232683	16	-0.0313	-0.475	0.753	-0.225	0.975	0.635	0.451	0.822
cg00034639	X	138356887	F	NR_028597	chrX:138529085-138529301	23	-0.98	-0.231	-1.32	-0.248	0.327	0.817	0.186	0.804
cg00034731	X	68264796	F		chrX:68348399-68348775	23	1.98	2	-0.151	1.41	0.0473	0.0456	0.88	0.158
cg00034755	22	49265227	R		chr22:50919453-50920376	22	1.3	1.38	1.25	-0.338	0.195	0.168	0.212	0.735
cg00034769	14	97514286	R	NR_015430		14	-1.02	-0.831	-1.21	0.203	0.309	0.406	0.228	0.839
cg00035000	1	25127590	F	NM_001031680;NM_004350	chr1:25255527-25259005	1	-1.87	-1.9	-0.0215	-1.17	0.0614	0.0574	0.983	0.241
cg00035197	16	87490487	F	NM_175931;NM_005187	chr16:88962670-88963451	16	-3.88	-1.75	-1.52	-3.4	0.000105	0.0804	0.129	0.000685
cg00035220	7	157890741	F	NM_002847;NM_130842;NM_130843	chr7:158198545-158198907	7	4.5	3.6	2.57	1.61	6.84e-06	0.000323	0.0101	0.108
cg00035268	6	167968243	R	NR_027906	chr6:168226063-168228559	6	0.523	-0.145	-1.19	2.08	0.601	0.885	0.232	0.0375
cg00035316	2	176701263	F	NM_019558	chr2:176992950-176993186	2	-0.691	-1.89	-0.506	1.22	0.49	0.0594	0.613	0.224
cg00035347	10	104943598	F	NM_012229;NM_001134373	chr10:104952242-104953232	10	2.26	2.17	0.785	0.871	0.0241	0.0299	0.432	0.384
cg00035398	7	158349381	R	NM_018051	chr7:158656282-158656744	7	-2.97	-2.51	-1.84	-0.789	0.003	0.0119	0.0658	0.43
cg00035449	6	169281571	R		chr6:169539501-169540033	6	-0.0286	0.403	0.28	-0.712	0.977	0.687	0.78	0.476
cg00035453	12	44408622	F	NM_152641;NR_028408	chr12:46120726-46124104	12	-3.72	-2.22	-1.65	-2.52	0.000203	0.0266	0.0997	0.0116
cg00035630	11	32993240	R	NM_139160;NM_001077242	chr11:33037206-33037917	11	3.11	1.25	2.26	1.95	0.00189	0.21	0.0239	0.0508
cg00035636	13	20798591	F		chr13:21900425-21900637	13	0.36	0.455	0.0538	0.0901	0.719	0.649	0.957	0.928
cg00035673	6	33395482	F	NM_001141969;NR_024517;NM_001350;NM_001141970	chr6:33288733-33289008	6	-1.96	-0.897	-1.29	-1.25	0.0495	0.37	0.197	0.212
cg00035847	1	29429603	R	NM_016011;NM_001024732	chr1:29557220-29557627	1	0.169	-0.383	-0.151	0.811	0.866	0.702	0.88	0.417
cg00035864	Y	8613009	F	NR_001550		24	0.902	1.66	0.581	-0.699	0.367	0.0977	0.561	0.485
cg00035889	4	38366305	R	NM_016531	chr4:38690308-38690605	4	4.22	1.94	2.24	3.14	2.43e-05	0.0524	0.0252	0.00169
cg00035937	7	91712021	F	NM_004912;NM_194456;NM_001013406;NM_194455;NM_019004;NM_194454	chr7:91874781-91875851	7	0.78	0.198	-0.183	1.27	0.436	0.843	0.855	0.204
cg00035969	1	111960620	R		chr1:112162204-112162837	1	0.756	1.09	1.58	-1.24	0.45	0.276	0.114	0.215
cg00035980	13	112648333	F		chr13:113597553-113598303	13	3.41	2.65	1.19	1.95	0.000657	0.00799	0.232	0.0508
cg00036011	6	26379697	F	NM_003534;NM_003525	chr6:26272470-26272696	6	-0.964	-0.343	0.247	-1.49	0.335	0.732	0.805	0.137
cg00036110	1	39919247	F	NM_016257	chr1:40149431-40150013	1	2.62	2.68	0.14	1.53	0.00872	0.00738	0.889	0.125
cg00036115	12	67366859	F	NM_020401	chr12:69080580-69081152	12	-3.59	-1.47	-2.04	-2.73	0.000328	0.141	0.0409	0.00625
cg00036119	16	7217834	R	NM_001142334;NM_001142333;NM_018723		16	0.482	-0.0528	0.387	0.526	0.63	0.958	0.699	0.599
cg00036137	19	61380251	F	NM_001145546;NM_033106		19	0.147	1.17	0.237	-1.16	0.883	0.243	0.813	0.244
cg00036299	16	10185006	F	NM_000833;NM_001134407	chr16:10273943-10277424	16	-1.45	-1.04	-0.441	-0.986	0.147	0.299	0.659	0.324
cg00036324	10	134543657	F		chr10:134692851-134693252	10	0.0661	-0.376	-0.398	0.849	0.947	0.707	0.691	0.396
cg00036347	1	150078547	R	NR_024237;NM_001136003	chr1:151812253-151812525	1	0.423	0.099	0.215	0.421	0.672	0.921	0.83	0.674
cg00036369	3	63963418	F	NM_001128149;NM_000333		3	3.65	1.76	1.93	2.64	0.000266	0.0792	0.0541	0.00837
cg00036408	17	76931436	R		chr17:79314962-79320653	17	0.601	0.719	0.538	-0.203	0.548	0.472	0.591	0.839
cg00036570	2	234049058	F	NM_018218	chr2:234385358-234385730	2	1.58	0.937	1.36	0.496	0.115	0.349	0.175	0.62
cg00036588	20	34709124	R	NM_032214;NM_175077		20	0.0136	0.653	-0.355	-0.338	0.989	0.514	0.723	0.735
cg00036599	1	148518698	R	NM_024579	chr1:150254365-150254637	1	3.56	1.6	2.37	2.26	0.00037	0.109	0.0179	0.0238
cg00036614	7	47060367	F		chr7:47092244-47093076	7	3.07	2.81	2.39	0.18	0.00211	0.00494	0.0169	0.857
cg00036723	17	29712991	R	NM_002981		17	-0.577	-0.495	-0.226	-0.263	0.564	0.621	0.821	0.793
cg00036732	10	102757497	R	NM_032429	chr10:102766321-102766693	10	0.753	0.574	0.71	0.0526	0.451	0.566	0.478	0.958
cg00036788	4	54669439	F		chr4:54975387-54976202	4	1.72	1.95	0.678	0.285	0.0856	0.0508	0.498	0.775
cg00036871	2	220145138	F	NM_015311;NM_002191	chr2:220434859-220436179	2	0.772	0.191	-0.4	1.45	0.44	0.848	0.689	0.147
cg00036976	16	83900782	F			16	-0.297	-0.323	-0.753	0.496	0.767	0.746	0.451	0.62
cg00037013	2	219430780	F		chr2:219723702-219725010	2	-0.0593	0.238	0.71	-0.969	0.953	0.812	0.478	0.333
cg00037117	X	44615662	F		chrX:44731602-44733266	23	3.24	2.37	2.01	1.25	0.00119	0.0178	0.0442	0.212
cg00037223	16	29729325	R	NM_001042539;NM_002383	chr16:29823163-29823906	16	2.67	2.04	0.129	2.28	0.00765	0.0415	0.897	0.0228
cg00037314	19	14135039	R	NM_014921;NM_001008701	chr19:14273429-14274173	19	1.88	1.49	0.237	1.42	0.0602	0.136	0.813	0.156
cg00037400	16	88170114	R	NM_014427;NM_153636	chr16:89641053-89643415	16	-2.4	-1.29	-1.46	-1.42	0.0164	0.196	0.143	0.156
cg00037457	17	56886526	R		chr17:59531723-59535254	17	1.46	-0.191	0.463	2.25	0.143	0.848	0.644	0.0242
cg00037681	12	45896638	F	NM_138371;NR_026544;NM_138371		12	3.26	2.18	1.79	1.67	0.00112	0.0294	0.0741	0.0949
cg00037763	18	40535761	F	NM_015559;NM_001130110		18	1.35	1.54	0.0861	0.616	0.176	0.124	0.931	0.538
cg00037856	3	129116317	F		chr3:127633993-127634588	3	2.94	2.09	1.22	1.73	0.00327	0.0365	0.224	0.084
cg00037952	10	104525266	F	NM_017787;NM_001083913		10	0.56	0.561	0.0646	0.308	0.576	0.575	0.949	0.758
cg00038020	1	221642416	R			1	0.563	0.251	0.721	0.0536	0.574	0.802	0.471	0.957
cg00038131	1	143924695	R	NM_203458	chr1:145208944-145210075	1	-3.5	-2.27	-2	-1.8	0.000464	0.0232	0.0454	0.0726
cg00038167	19	7504438	F	NM_001166112;NM_001166111;NM_006702;NM_001166113;NM_020533	chr19:7598413-7601008	19	0.449	-0.31	-0.409	1.43	0.654	0.756	0.683	0.151
cg00038233	11	123404275	F	NM_001004464		11	-1.28	-0.462	0.00548	-1.68	0.2	0.644	0.996	0.0924
cg00038298	3	49210037	R	NM_178173	chr3:49236567-49237328	3	3.21	1.64	0.839	2.98	0.0013	0.1	0.401	0.00286
cg00038342	2	1630137	R	NM_012293	chr2:1651995-1653401	2	2.15	0.376	2.11	1.38	0.0314	0.707	0.035	0.167
cg00038584	19	17794300	F	NM_005543	chr19:17931951-17932370	19	2.11	1.03	0.606	1.95	0.0349	0.303	0.545	0.0508
cg00038665	4	129018276	F		chr4:128801886-128802696	4	2.78	1.58	1.69	1.57	0.00537	0.113	0.0912	0.116
cg00038675	1	151120167	F	NM_030663		1	-2.18	-1	-0.828	-1.91	0.0293	0.316	0.407	0.0564
cg00038736	19	43568974	F	NM_152657	chr19:38876614-38878950	19	-1.74	-1.5	-0.151	-1.25	0.0819	0.132	0.88	0.212
cg00038857	17	29669866	R	NM_005623		17	5.09	3.37	2.24	3.13	3.61e-07	0.000765	0.0252	0.00173
cg00039016	16	85979085	F	NR_024568	chr16:87425137-87426677	16	0.0967	-1.65	0.828	1.13	0.923	0.099	0.407	0.257
cg00039057	22	28492510	F	NM_001003684;NM_013387;NM_019103;NM_001003692	chr22:30162836-30163532	22	-1.88	-1.7	-1.15	-0.391	0.0608	0.0887	0.25	0.696
cg00039070	7	132817597	F	NM_021807;NM_001037126		7	2.63	2.4	0.409	1.6	0.00845	0.0163	0.683	0.11
cg00039129	6	166020241	R			6	2.02	1.94	-0.215	1.59	0.0433	0.0524	0.83	0.111
cg00039147	17	32268741	R			17	-1.12	-0.878	-0.258	-0.751	0.264	0.38	0.796	0.453
cg00039176	5	140733260	F	NM_018917;NM_032086;NM_018912;NM_018918;NM_018922;NM_018919;NM_018916;NM_018915;NM_018923;NM_018924	chr5:140753654-140753952	5	-1.64	-0.554	-0.979	-1.34	0.1	0.579	0.328	0.181
cg00039326	1	36388432	F	NM_014408	chr1:36614855-36615462	1	0.73	-0.871	0.0861	2.05	0.465	0.384	0.931	0.0403
cg00039385	19	4509558	F	NM_032108	chr19:4558363-4558579	19	-3.19	-1.1	-1.5	-2.91	0.00144	0.27	0.135	0.00356
cg00039441	2	176665719	R	NM_000523	chr2:176957054-176958279	2	-1.61	-0.707	-1.18	-0.942	0.107	0.479	0.237	0.346
cg00039463	16	3871490	R	NM_004380;NM_001079846	chr16:3930648-3931651	16	1.08	0.396	0.108	1.32	0.279	0.692	0.914	0.186
cg00039480	17	19560859	F	NM_001099646;NM_152908	chr17:19617083-19617424	17	-0.673	-0.178	-0.678	-0.353	0.501	0.859	0.498	0.724
cg00039489	16	24620023	F			16	0.981	0.567	0.0753	1	0.326	0.57	0.94	0.316
cg00039564	7	27747117	R	NM_006024;NM_001079864	chr7:27779566-27780601	7	-2.92	-0.95	-1.52	-2.6	0.00353	0.342	0.129	0.00935
cg00039801	17	75403479	F		chr17:77783809-77789842	17	1.22	0.562	0.495	1.04	0.221	0.574	0.62	0.296
cg00039936	19	54959693	R	NM_021733	chr19:50269632-50270505	19	4.95	3.15	1.59	3.69	7.33e-07	0.00161	0.111	0.000226
cg00040013	1	247135096	R		chr1:249167408-249168010	1	-2.37	-0.501	-1.76	-1.93	0.0176	0.616	0.0776	0.0535
cg00040016	17	55188068	R	NM_030938		17	2.02	1.55	2.18	-0.113	0.0431	0.121	0.029	0.91
cg00040027	2	172455728	F	NM_003705	chr2:172750718-172751020	2	3.48	2.07	1.04	2.8	0.000511	0.0386	0.297	0.00508
cg00040047	2	161729248	F	NM_004180;NM_133484	chr2:162016883-162017331	2	1.92	2.36	2.02	-0.984	0.0552	0.0182	0.0431	0.325
cg00040067	1	33138290	F	NM_033504	chr1:33366792-33367002	1	1.31	0.368	0.0861	1.74	0.191	0.713	0.931	0.0814
cg00040103	2	45893740	F	NM_005400		2	1.34	1.71	0.925	-0.323	0.181	0.0874	0.355	0.747
cg00040268	7	27119424	R	NM_153631;NM_030661;NM_153632	chr7:27153187-27153647	7	-1.16	-1.5	-0.689	0.188	0.244	0.134	0.491	0.851
cg00040312	12	52710946	F	NM_014620;NR_003084	chr12:54424610-54425173	12	-1.17	-0.897	-1.25	0.0451	0.24	0.37	0.212	0.964
cg00040411	6	164313155	F		chr6:164393071-164393824	6	0.851	-0.0924	0.678	0.931	0.395	0.926	0.498	0.352
cg00040419	X	13580581	R	NM_152634	chrX:13671086-13671606	23	-0.778	-1.35	-0.323	0.368	0.437	0.176	0.747	0.713
cg00040426	9	137553074	R	NM_002297		9	-0.46	-0.0858	-0.549	-0.203	0.646	0.932	0.583	0.839
cg00040427	19	13905197	R	NM_001146254;NM_024825;NM_001146255	chr19:14043645-14044211	19	0.193	0.561	-0.194	-0.0826	0.847	0.575	0.846	0.934
cg00040455	X	30236597	R	NM_000475	chrX:30326439-30327668	23	-1.73	-1.7	-0.678	-0.556	0.0843	0.0887	0.498	0.578
cg00040466	6	168661446	R	NM_022138;NM_001166412	chr6:168918596-168918902	6	-0.34	0.422	0.452	-1.4	0.734	0.673	0.651	0.16
cg00040486	8	123859924	F		chr8:123792369-123794942	8	4.26	2.42	2.64	2.37	2e-05	0.0157	0.00839	0.0176
cg00040530	2	242484037	R		chr2:242832999-242833229	2	-1.91	-0.944	-0.71	-1.62	0.0565	0.345	0.478	0.106
cg00040566	10	131527089	F	NM_001005463	chr10:131637098-131637310	10	4.82	3.73	2.04	2.47	1.46e-06	0.000193	0.0409	0.0135
cg00040575	22	16886180	R	NM_001122731;NM_015241;NM_001136004	chr22:18506419-18507412	22	-1.38	-1.02	-1.03	-0.361	0.168	0.306	0.302	0.718
cg00040588	1	1280575	R	NM_032348	chr1:1289707-1291126	1	2.77	1.35	-0.699	3.89	0.00561	0.178	0.484	9.98e-05
cg00040646	12	68265344	R	NM_006431	chr12:69979065-69979724	12	-1.85	-0.666	-1.29	-1.3	0.0637	0.505	0.197	0.194
cg00040708	3	49813631	R	NM_001007540	chr3:49840103-49841191	3	-0.755	-0.515	-0.527	-0.278	0.45	0.607	0.598	0.781
cg00040749	2	62409583	F			2	1.7	1.01	1.13	0.834	0.0886	0.313	0.259	0.404
cg00040837	1	234147720	F			1	-2.04	-1.1	-0.43	-1.93	0.0412	0.273	0.667	0.0535
cg00040862	2	1395896	R	NM_175721;NM_175719;NM_000547;NM_175722		2	4.27	2	2.58	2.85	1.98e-05	0.0456	0.00982	0.00431
cg00040923	X	100693536	F	NM_016608	chrX:100807793-100808048	23	-0.611	-0.587	-0.968	0.428	0.541	0.557	0.333	0.669
cg00040986	1	155223263	F	NM_014784;NM_198236		1	2.28	2.19	1.27	0.466	0.0229	0.0288	0.204	0.641
cg00041014	1	52270632	F	NM_138417;NM_015913;NM_138417	chr1:52498452-52499505	1	2.34	1.83	0.29	1.8	0.0193	0.0666	0.771	0.0726
cg00041047	19	54520441	F	NM_014037	chr19:49828412-49828668	19	3.91	2.54	2.07	2.15	9.21e-05	0.011	0.0389	0.0315
cg00041270	4	25625895	R			4	-2.21	-0.521	-1.6	-1.77	0.0272	0.602	0.109	0.0763
cg00041311	16	46959613	F	NM_003031	chr16:48399730-48400040	16	3.24	2.66	1.7	1.22	0.0012	0.00787	0.0891	0.221
cg00041401	1	114215931	R	NM_012411;NM_015967		1	-0.643	0.996	-0.699	-1.49	0.52	0.319	0.484	0.135
cg00041564	17	9749912	F	NM_002903	chr17:9808067-9808339	17	0.756	0.442	0.818	0.0977	0.45	0.658	0.414	0.922
cg00041575	11	2279317	F	NR_024621;NM_139022;NM_001142946		11	3.84	2.61	2.29	1.76	0.000125	0.00915	0.0219	0.0788
cg00041599	5	176172644	F	NM_133369	chr5:176236761-176238081	5	0.112	-0.343	0.463	0.135	0.911	0.732	0.644	0.892
cg00041636	15	76740737	R			15	-2.39	-1.39	-0.0646	-2.53	0.0171	0.166	0.949	0.0114
cg00041641	1	149291238	F	NM_020239;NM_001038707	chr1:151020162-151020627	1	3.22	2.09	1.3	2.12	0.00129	0.0365	0.193	0.0341
cg00041666	6	152744023	R	NM_182961;NM_033071		6	-2.66	-2.22	-1.62	-0.759	0.00782	0.0262	0.104	0.448
cg00041865	5	14957423	F			5	3.11	2.05	0.871	2.35	0.00189	0.0402	0.383	0.0187
cg00041873	7	98976919	F		chr7:99140766-99141151	7	2.8	2.21	2.52	0.225	0.00509	0.0271	0.0118	0.822
cg00041989	17	53183037	F			17	1.63	1.97	0.14	0.593	0.103	0.0493	0.889	0.553
cg00042059	2	54941092	F	NM_001039753		2	2.86	1.8	2.31	0.931	0.00421	0.0721	0.0207	0.352
cg00042081	6	127517426	R	NM_032784		6	4.22	3.33	3.38	0.706	2.41e-05	0.000861	0.000729	0.48
cg00042156	10	42290848	F	NR_026827	chr10:42971195-42971834	10	-0.0975	-0.554	-0.366	0.729	0.922	0.579	0.715	0.466
cg00042208	5	172976956	R	NM_001159651;NM_138369	chr5:173043123-173043895	5	3.7	2.44	1.97	1.99	0.000212	0.0146	0.049	0.0465
cg00042246	5	139473674	R	NM_005859	chr5:139493595-139494541	5	-0.542	0.271	-1.23	-0.113	0.588	0.787	0.22	0.91
cg00042254	1	45792550	R	NM_006066;NM_153326	chr1:46016403-46016694	1	3.24	2.32	1.85	1.44	0.00119	0.0206	0.0642	0.149
cg00042263	2	118219866	F			2	-1.29	-0.541	-0.818	-0.901	0.196	0.588	0.414	0.367
cg00042325	7	149735588	F	NR_027237	chr7:150104704-150105530	7	-0.584	0.0858	0.14	-1.19	0.559	0.932	0.889	0.232
cg00042409	3	114715658	F	NM_144718	chr3:113233663-113234094	3	-4.35	-2.66	-2.35	-2.52	1.35e-05	0.00783	0.019	0.0116
cg00042478	5	14763790	R	NM_054027		5	3.8	2.36	1.73	2.45	0.000143	0.0182	0.0832	0.0144
cg00042568	3	14962943	R	NM_003298	chr3:14988612-14989036	3	-2.14	-0.389	-0.721	-2.57	0.0323	0.697	0.471	0.0102
cg00042657	1	170020251	R	NM_015935;NM_014955;NM_001007239	chr1:171753416-171753629	1	2.92	2.01	0.549	2.37	0.00345	0.0439	0.583	0.018
cg00042683	15	43274767	R	NM_138356	chr15:45490945-45491252	15	1.46	1.41	0.99	0.135	0.144	0.158	0.322	0.892
cg00042837	17	34282176	R	NM_006148	chr17:37025737-37027104	17	0.665	1.05	-0.0323	0.0676	0.506	0.294	0.974	0.946
cg00042882	7	100583529	R	NM_001283	chr7:100797532-100798479	7	0.32	1.12	-0.667	-0.03	0.749	0.262	0.505	0.976
cg00042914	18	22700309	F	NR_026908;NM_001650	chr18:24443200-24443458	18	3.71	2.4	2.72	1.39	0.000205	0.0166	0.00649	0.165
cg00043004	16	1970893	R	NM_172167;NM_144603;NM_172168	chr16:2028987-2030710	16	0.456	0.422	0.699	-0.285	0.649	0.673	0.484	0.775
cg00043005	19	2178429	R	NM_032482	chr19:2226193-2228342	19	-0.128	0.337	0.172	-0.714	0.898	0.736	0.863	0.475
cg00043043	7	91992654	F	NM_000466	chr7:92157487-92158405	7	3.24	2.45	2.16	1.03	0.00118	0.0141	0.0306	0.303
cg00043076	4	8494677	F	NM_001101667;NM_003501	chr4:8442433-8443113	4	1.27	0.172	-0.581	2.47	0.204	0.864	0.561	0.0135
cg00043080	19	45544995	R	NM_012268;NM_001031696;NM_178830	chr19:40854180-40854733	19	2.82	1.83	0.603	2.32	0.00483	0.0676	0.547	0.0203
cg00043284	17	75569937	F	NM_019020	chr17:77955491-77955693	17	2.91	1.37	0.559	3	0.00359	0.17	0.576	0.00272
cg00043364	5	133944004	R	NM_015288		5	1.65	1.49	1.12	0.263	0.0983	0.136	0.263	0.793
cg00043444	6	134426399	F			6	-2.36	-1.97	-0.979	-1.09	0.0182	0.0493	0.328	0.276
cg00043510	1	233880757	F	NM_001098722;NM_001098721;NM_004485	chr1:235814280-235814488	1	-4.38	-1.82	-2.07	-3.69	1.17e-05	0.0686	0.0389	0.000226
cg00043524	6	169693879	F	NM_182552		6	5.09	2.85	2.73	3.24	3.5e-07	0.00436	0.00628	0.00121
cg00043564	7	100792552	R	NM_133457	chr7:101005899-101007443	7	-1.83	-1.87	-0.753	-0.481	0.0679	0.0609	0.451	0.631
cg00043591	7	156567621	F		chr7:156871054-156871297	7	-1.02	-0.264	0.108	-1.55	0.306	0.792	0.914	0.122
cg00043599	1	45047187	F	NM_001136537	chr1:45271679-45272318	1	1.35	1.15	0.656	0.511	0.176	0.248	0.512	0.609
cg00043790	1	6016559	R	NM_003636;NM_172130		1	-0.0793	0.0792	-1.02	0.684	0.937	0.937	0.307	0.494
cg00043792	10	26259310	F		chr10:26222921-26224022	10	4.14	1.85	3.07	2.38	3.42e-05	0.0647	0.00217	0.0175
cg00043800	2	74465652	R	NR_024463		2	-1.62	-1.25	-1.25	-0.346	0.105	0.212	0.212	0.73
cg00044050	16	11347211	R	NM_152308	chr16:11439186-11439767	16	-0.703	-0.211	-0.759	-0.303	0.482	0.833	0.448	0.762
cg00044097	2	105421585	F	NM_201557;NM_201557		2	-0.178	-0.983	-0.29	0.969	0.859	0.326	0.771	0.333
cg00044107	6	75851787	F	NM_080645;NM_004370	chr6:75794880-75795088	6	-4.72	-3.47	-3.18	-1.56	2.41e-06	0.000519	0.00145	0.118
cg00044299	18	22380359	R	NM_001136205;NM_001142730;NM_198991	chr18:24126780-24131138	18	4.2	2.4	1.85	2.97	2.69e-05	0.0163	0.0642	0.00301
cg00044318	19	39680591	F	NM_001080436	chr19:34988748-34988951	19	0.428	0.666	0.0215	0.015	0.669	0.505	0.983	0.988
cg00044354	1	67162472	R	NM_001146112;NM_024763;NM_001077700;NM_001146110;NM_001146111;NM_001146113;NM_001077702;NM_207014;NM_020948;NM_001077703	chr1:67390468-67391109	1	2.34	1.72	0.398	1.83	0.0192	0.0862	0.691	0.0679
cg00044372	16	83628326	F	NM_014732		16	-0.341	0.0569	-0.915	0.173	0.733	0.955	0.36	0.863
cg00044463	1	182273556	F	NM_015101	chr1:184005359-184006766	1	-3	-0.951	-1.16	-3.05	0.00273	0.341	0.245	0.00231
cg00044466	16	15146026	R			16	1.31	0.449	-0.108	1.84	0.19	0.654	0.914	0.0657
cg00044505	8	48811639	F		chr8:48649766-48651653	8	-0.503	0.251	0.0753	-1.17	0.615	0.802	0.94	0.241
cg00044665	16	64957912	F	NM_001795		16	0.57	0.95	0.14	-0.143	0.569	0.342	0.889	0.887
cg00044729	22	38620922	F	NM_152512		22	0.881	0.983	0.775	-0.21	0.378	0.326	0.439	0.833
cg00044871	13	24843811	F	NM_016529	chr13:25945993-25946953	13	1.35	1.2	0.269	0.796	0.178	0.23	0.788	0.426
cg00045070	1	55277237	R	NM_174936	chr1:55505060-55506015	1	-1.58	-0.37	-0.43	-1.9	0.114	0.712	0.667	0.0574
cg00045114	1	170940782	F			1	3.63	2.84	1.52	1.84	0.000288	0.00446	0.129	0.0657
cg00045118	8	93145353	R	NM_175634;NM_175635;NM_004349		8	0.1	0.251	0.0861	-0.165	0.92	0.802	0.931	0.869
cg00045227	11	56224520	R	NM_001013356;NM_001013358;NM_001005213		11	-3.57	-2.45	-1.64	-2.04	0.000357	0.0141	0.102	0.041
cg00045439	4	107457574	R	NM_004757;NM_001163437;NM_001142416;NM_033115;NM_001142415;NM_001163435;NM_001163436		4	-4.37	-2.88	-1.66	-2.94	1.24e-05	0.00401	0.0975	0.00331
cg00045515	20	35156746	F	NM_183404;NM_002895	chr20:35724039-35724644	20	3.24	1.37	1.78	2.49	0.00118	0.172	0.0759	0.0126
cg00045532	12	36779981	F			12	-1.06	-1.14	-0.678	-0.00751	0.29	0.254	0.498	0.994
cg00045607	1	159306314	F	NM_181720;NM_001025598;NM_181720;NM_001025598		1	0.305	0.858	0.323	-0.654	0.76	0.391	0.747	0.513
cg00045689	1	234083808	F	NM_000081;NR_031718		1	4.6	2.78	2.17	2.97	4.28e-06	0.00547	0.0298	0.00301
cg00045690	6	32933875	R	NM_002800;NM_148954	chr6:32820849-32822370	6	5.35	3.55	2.66	3.01	8.82e-08	0.000385	0.00787	0.00259
cg00045748	22	41238740	R	NM_015703	chr22:42909975-42910247	22	1.56	1.5	1.56	-0.293	0.119	0.134	0.119	0.77
cg00045753	9	122670366	F	NM_015651	chr9:123631106-123631672	9	4.65	3.19	1.19	3.49	3.38e-06	0.0014	0.232	0.000491
cg00045762	5	167114340	F	NM_001122679		5	-0.823	0.0594	-0.732	-0.804	0.41	0.953	0.464	0.422
cg00045787	16	67875528	F	NM_006750		16	-1.06	0.62	0.344	-2.72	0.291	0.535	0.731	0.00654
cg00045900	8	144964452	F	NM_015356;NM_182706	chr8:144892920-144893468	8	4.77	3.58	1.7	2.85	1.83e-06	0.00034	0.0891	0.00441
cg00045902	10	134072208	R	NM_138499;NM_001098637	chr10:134218268-134219615	10	2.66	2.55	0.527	1.39	0.00783	0.0109	0.598	0.165
cg00045910	10	23506076	R		chr10:23462224-23463889	10	-0.679	0.284	0.247	-1.65	0.497	0.777	0.805	0.0984
cg00046021	7	100645171	F	NM_001084	chr7:100860297-100861029	7	0.0657	1.57	-0.527	-1.04	0.948	0.116	0.598	0.296
cg00046026	20	61421206	R	NM_020882	chr20:61951346-61951549	20	-2.07	0.12	-0.979	-2.75	0.038	0.904	0.328	0.00597
cg00046099	X	54573168	R	NM_019067	chrX:54556428-54556959	23	-3.04	-0.805	-1.4	-3.06	0.00234	0.421	0.162	0.00218
cg00046156	5	2162785	F		chr5:2111836-2112484	5	-0.87	0.066	-0.538	-1.06	0.385	0.947	0.591	0.29
cg00046336	2	118333700	R		chr2:118616575-118618163	2	-1.02	-0.541	0.646	-1.72	0.31	0.588	0.519	0.0854
cg00046410	1	35353649	F	NM_024772		1	4.26	3.19	2.35	1.82	2.09e-05	0.00144	0.019	0.0691
cg00046499	3	155628877	F	NM_001038705	chr3:154146347-154146965	3	-2.76	-1.33	-1.26	-2.17	0.00574	0.183	0.208	0.0299
cg00046623	8	52482816	R	NM_144651	chr8:52321162-52322221	8	4.26	3.02	2.51	1.86	2.08e-05	0.00257	0.0122	0.0635
cg00046744	12	12309812	R	NM_002336	chr12:12419679-12420541	12	-0.679	-0.515	-0.441	-0.225	0.497	0.607	0.659	0.822
cg00046802	9	129500496	R		chr9:130461543-130461839	9	3.28	1.9	1.82	1.96	0.00105	0.0574	0.069	0.0499
cg00046899	13	96575691	R			13	-0.868	-1.47	-0.441	0.443	0.386	0.141	0.659	0.658
cg00047050	11	107384641	F	NM_003478;NM_003478	chr11:107879500-107880398	11	-2.26	-1.45	-0.484	-1.89	0.024	0.148	0.628	0.0594
cg00047052	4	189815836	R		chr4:189580300-189580762	4	3.92	2.93	1.47	2.28	8.89e-05	0.00339	0.14	0.0224
cg00047079	13	78086976	R	NM_024546		13	2.29	0.851	0.958	2.13	0.0221	0.395	0.338	0.0329
cg00047147	6	33030324	R	NM_006120		6	4.27	3.02	2.65	1.75	1.94e-05	0.00257	0.00813	0.0794
cg00047162	18	14990434	F		chr18:14997380-15000542	18	-2.45	-1.79	-1.36	-1.09	0.0142	0.0727	0.175	0.276
cg00047185	19	58888661	R	NR_030190		19	2.81	1.38	2.18	1.39	0.00495	0.168	0.029	0.165
cg00047287	22	49363765	F	NM_152246;NM_001145137;NM_001145135;NR_027928;NM_152245;NM_001145136;NM_001145134;NM_004377	chr22:51016253-51017020	22	1.94	1.76	0.344	1.16	0.0523	0.0792	0.731	0.247
cg00047338	17	77029329	F	NM_001080519	chr17:79415492-79415783	17	0.949	0.891	0.473	0.263	0.343	0.373	0.636	0.793
cg00047501	2	201389105	F	NM_014670;NR_026584	chr2:201675989-201677306	2	2.92	2.33	0.882	1.74	0.00349	0.0198	0.378	0.0814
cg00047532	6	42990384	F	NM_138296	chr6:42879279-42879623	6	-0.209	-1.39	1.46	-0.21	0.835	0.166	0.143	0.833
cg00047553	6	33198282	R	NR_001435		6	0.589	0.178	-0.183	0.969	0.556	0.859	0.855	0.333
cg00047683	16	70591623	F	NM_181536		16	-1.06	-0.376	-0.958	-0.548	0.291	0.707	0.338	0.583
cg00047694	16	84934554	R	NR_024406		16	0.303	0.548	-0.549	0.428	0.762	0.584	0.583	0.669
cg00047753	17	8185661	F	NM_153007		17	2.91	1.76	1.93	1.39	0.00367	0.0792	0.0541	0.165
cg00047815	22	43690165	F	NM_138415;NM_001135862	chr22:45312218-45312475	22	1.95	1.8	0.29	1.17	0.0512	0.0716	0.771	0.241
cg00047843	12	81845543	F	NM_152588		12	3.62	3.05	1.32	1.8	0.000291	0.0023	0.186	0.0726
cg00048178	6	13596236	F	NM_018988	chr6:13486324-13488792	6	-0.173	-0.152	0.495	-0.571	0.862	0.879	0.621	0.568
cg00048370	6	164426929	R			6	-0.366	-0.033	-0.559	-0.0901	0.714	0.974	0.576	0.928
cg00048381	1	152854131	F	NM_001025107		1	0.944	1.27	-0.71	0.901	0.345	0.203	0.478	0.367
cg00048436	5	32744828	F		chr5:32709910-32714450	5	1.68	1.32	0.592	0.946	0.0932	0.187	0.554	0.344
cg00048697	4	56154012	R	NM_152401		4	-2.17	-0.812	-0.42	-2.46	0.0297	0.417	0.675	0.014
cg00048705	6	170405251	F		chr6:170564873-170565152	6	2.9	1.96	0.852	2.1	0.00375	0.05	0.394	0.0354
cg00048743	5	140762551	F	NM_018917;NM_018919;NM_018921;NM_018912;NM_032088;NM_018918;NM_018922;NM_003736;NM_018916;NM_032089;NM_018915;NM_018920;NM_018923;NM_018925;NM_018924	chr5:140779013-140779659	5	-0.792	0.185	-0.495	-1.09	0.428	0.853	0.621	0.276
cg00048759	7	99613358	F	NM_012447;NM_152742	chr7:99774733-99775583	7	2.76	1.65	0.194	2.77	0.00583	0.099	0.846	0.00557
cg00049033	16	47874581	R	NM_004352	chr16:49316997-49317263	16	-0.00763	-0.818	0.893	0.0451	0.994	0.413	0.372	0.964
cg00049102	13	71318300	F	NM_004392;NM_080760;NM_080759		13	2.2	2.63	0.118	0.901	0.0275	0.00863	0.906	0.367
cg00049156	1	93416491	R	NM_016040;NR_030761;NM_001167830	chr1:93645432-93646471	1	-2.1	-1.39	-1.48	-0.796	0.0357	0.164	0.138	0.426
cg00049323	5	525564	R	NR_024158	chr5:472600-474261	5	1.89	1.67	0.538	0.992	0.0586	0.095	0.591	0.321
cg00049380	16	82724375	F	NM_001146051;NM_031463		16	3.28	1.46	3.39	1.04	0.00105	0.145	0.000701	0.3
cg00049382	13	33148985	F			13	-1.18	-1.13	0.226	-1.03	0.237	0.259	0.821	0.303
cg00049400	1	119377265	F	NM_201263;NM_015836		1	4.15	2.71	1.69	2.71	3.35e-05	0.00682	0.0912	0.00669
cg00049440	9	72216463	R	NM_001206	chr9:73027330-73029184	9	1.13	1.09	0.344	0.473	0.26	0.276	0.731	0.636
cg00049475	10	29963742	R	NM_021738;NM_021738;NM_003174		10	0.915	0.508	1.43	-0.24	0.36	0.611	0.152	0.81
cg00049595	6	41758614	F		chr6:41650672-41651582	6	-0.347	-0.33	-0.398	0.105	0.728	0.741	0.691	0.916
cg00049664	16	65170835	R	NM_144673	chr16:66612749-66613412	16	4.99	2.05	2.29	4.27	6.14e-07	0.0402	0.0219	1.98e-05
cg00049729	5	55812102	R		chr5:55776604-55777233	5	0.0975	0.0924	-0.656	0.646	0.922	0.926	0.512	0.518
cg00049868	2	11162858	F			2	3.62	2.22	2.03	2.03	0.000292	0.0266	0.0421	0.0425
cg00049883	16	5494274	F			16	2.21	1	1.16	1.67	0.027	0.316	0.245	0.0954
cg00049892	6	132204466	F	NM_006208		6	1.51	0.798	1.09	0.759	0.132	0.425	0.277	0.448
cg00050133	4	178404577	F			4	3.94	2.33	2.37	2.15	8.23e-05	0.0198	0.0179	0.0317
cg00050271	16	80301382	F	NM_198390;NM_030629		16	3.99	2.37	2.25	2.31	6.5e-05	0.0178	0.0245	0.0211
cg00050289	17	59981330	R	NM_022739		17	4.88	3.58	2.21	2.58	1.09e-06	0.000348	0.0274	0.00976
cg00050294	1	2876678	F		chr1:2886589-2886923	1	0.106	0.112	-0.646	0.631	0.915	0.911	0.519	0.528
cg00050336	4	14987063	F	NM_001135170;NM_001135171		4	-1.64	-1.76	0.269	-1.19	0.101	0.0781	0.788	0.235
cg00050375	6	43512806	R	NM_033450		6	1.14	1.22	0.732	0.0225	0.253	0.222	0.464	0.982
cg00050402	7	55040516	F		chr7:55072962-55073433	7	-2.01	-2.04	-1.04	-0.361	0.0447	0.0415	0.297	0.718
cg00050482	16	71764714	F			16	-0.433	0.356	-0.699	-0.481	0.665	0.722	0.484	0.631
cg00050496	12	108696084	R	NR_026662;NR_026661		12	0.324	0.132	0.516	-0.0451	0.746	0.895	0.606	0.964
cg00050618	16	27321919	R	NM_181079;NM_181078		16	3.46	3.11	1.8	1.04	0.000548	0.00188	0.0724	0.3
cg00050654	4	4627394	F		chr4:4577004-4577448	4	2.98	2.3	1.42	1.4	0.00287	0.0217	0.156	0.16
cg00050692	2	25378381	R	NM_022552;NM_175630;NM_175629		2	-0.111	0.172	-0.14	-0.24	0.912	0.864	0.889	0.81
cg00050872	7	127879460	F		chr7:128095678-128096197	7	-0.94	-1.13	-0.925	0.391	0.347	0.258	0.355	0.696
cg00050873	Y	9973356	R	NM_001164471;NR_001553	chrY:9363680-9363943	24	-2.79	-1.79	-0.506	-2.41	0.00526	0.0737	0.613	0.0159
cg00050938	3	50271104	F	NM_002070;NM_001166425	chr3:50297440-50298097	3	0.577	-1	0.699	1.39	0.564	0.316	0.484	0.165
cg00051154	2	236743838	R		chr2:237080188-237080432	2	0.123	0.158	-0.549	0.526	0.902	0.874	0.583	0.599
cg00051307	5	72559949	R		chr5:72526203-72526497	5	0.917	2.29	0.559	-1.31	0.359	0.022	0.576	0.191
cg00051371	7	75280614	R	NM_002991		7	-2.12	-0.297	-1	-2.39	0.0338	0.767	0.317	0.0169
cg00051483	7	149842744	F	NM_153236		7	-0.289	0.891	0.948	-2.23	0.773	0.373	0.343	0.0257
cg00051510	6	41446060	R		chr6:41339236-41340027	6	1.33	1.02	0.172	1.03	0.184	0.306	0.863	0.303
cg00051590	6	31867465	R	NM_006295	chr6:31763240-31763905	6	-0.388	-0.403	-0.237	-0.03	0.698	0.687	0.813	0.976
cg00051595	6	31897964	F			6	-2.8	-2.15	-0.925	-1.68	0.00517	0.0315	0.355	0.0933
cg00051623	11	104412239	F	NM_001223;NM_033292;NM_033294;NM_033293;NM_033295		11	0.782	0.0264	1.44	0.0225	0.434	0.979	0.149	0.982
cg00051662	10	96511076	F	NM_000769		10	-1.26	-0.68	-1.36	-0.225	0.208	0.497	0.175	0.822
cg00051704	22	19683809	R		chr22:21354247-21354504	22	2.88	2.18	1.66	1.13	0.00403	0.029	0.0975	0.257
cg00051818	7	66005093	F		chr7:66368772-66369612	7	0.212	0.231	-1.13	1.11	0.832	0.817	0.259	0.266
cg00051952	X	153258493	R		chrX:153606334-153608237	23	2.28	2.11	-0.194	1.83	0.0226	0.0347	0.846	0.0668
cg00052046	20	3161682	F	NM_032034	chr20:3214696-3214927	20	2.9	2.36	2.02	0.676	0.00369	0.0182	0.0431	0.499
cg00052246	3	71188942	F	NM_032682		3	3.76	2.68	2.15	1.68	0.000171	0.00731	0.0313	0.0939
cg00052385	8	134649762	F	NM_003033;NM_173344	chr8:134581969-134584875	8	0.667	1.21	0.861	-0.879	0.505	0.227	0.389	0.379
cg00052433	16	86004779	F	NM_015144	chr16:87447699-87448131	16	4.04	2.05	1.42	3.44	5.35e-05	0.0405	0.156	0.000581
cg00052482	1	149492763	R	NM_002810		1	4.24	2.54	1.71	3.02	2.22e-05	0.0111	0.0871	0.00253
cg00052578	3	134326255	R	NM_001136469;NM_023943		3	-3.59	-1.56	-1.85	-2.81	0.000326	0.118	0.0642	0.00496
cg00052588	16	88199640	F			16	1.29	1.19	-1.33	2.12	0.196	0.232	0.182	0.0341
cg00052626	1	15723429	F	NM_032996;NM_001229	chr1:15851106-15851581	1	-2.86	-0.891	-2.03	-2.12	0.00425	0.373	0.0424	0.0341
cg00052665	17	9881820	F	NM_201432;NM_201433		17	3.96	2.9	1.23	2.6	7.59e-05	0.00377	0.22	0.00935
cg00052684	6	35802223	R	NM_001145775	chr6:35695725-35696156	6	-1.51	-0.125	-0.732	-1.77	0.132	0.9	0.464	0.0775
cg00052772	6	33353782	F	NM_003782	chr6:33244677-33245554	6	2.61	1.49	1.12	1.88	0.00899	0.136	0.263	0.0604
cg00052903	12	11314164	F	NM_006249		12	2.66	2.17	1.62	0.819	0.00774	0.0299	0.104	0.413
cg00052932	2	190248023	R	NM_144708	chr2:190539026-190539533	2	1.64	1.32	2	-0.361	0.101	0.187	0.0454	0.718
cg00052964	2	84989334	R		chr2:85131950-85132234	2	3.39	1.5	2.01	2.4	0.000687	0.132	0.0442	0.0166
cg00053063	2	133908430	F	NM_207363;NM_207481		2	2.27	1.68	1.41	0.864	0.0229	0.0937	0.159	0.388
cg00053073	19	18198107	F	NM_001098818;NM_000923	chr19:18335072-18337375	19	-0.0356	-0.719	1.07	-0.255	0.972	0.472	0.287	0.798
cg00053086	1	231185919	F		chr1:233121927-233122136	1	0.436	0	-0.022	0.751	0.663	1	0.982	0.453
cg00053361	8	127319362	F			8	2.3	2.28	1.98	-0.225	0.0216	0.0224	0.0477	0.822
cg00053393	4	183301382	F	NR_027107	chr4:183063396-183066370	4	-0.321	-0.501	-1	0.856	0.748	0.616	0.317	0.392
cg00053536	1	17163796	R	NM_014675	chr1:17292904-17293115	1	0.145	0.0264	0.409	-0.143	0.885	0.979	0.683	0.887
cg00053728	2	3443174	R	NM_016030	chr2:3461654-3461863	2	0.408	-0.831	-0.312	1.82	0.683	0.406	0.755	0.0691
cg00053755	5	139708895	F		chr5:139725530-139726234	5	3.71	2.16	2.3	2.01	0.000208	0.0309	0.0217	0.0449
cg00053769	16	57341090	F			16	1.4	1.19	1.21	0.0751	0.16	0.232	0.228	0.94
cg00053851	1	224337065	F		chr1:226270723-226271841	1	2.02	1.08	-0.258	2.52	0.0431	0.282	0.796	0.0116
cg00053916	8	37576487	R			8	-2.32	-0.297	-0.247	-3.38	0.0204	0.767	0.805	0.000724
cg00053927	13	112747015	R	NM_001112732;NM_024979	chr13:113701833-113702280	13	0.282	-0.633	-0.538	1.6	0.778	0.526	0.591	0.11
cg00054173	21	33464306	R	NR_024102		21	3.57	3.2	1.88	1.07	0.000354	0.00138	0.0597	0.286
cg00054197	5	171698355	F	NM_001017995	chr5:171766422-171766826	5	0.533	1.31	-0.441	-0.0676	0.594	0.189	0.659	0.946
cg00054210	8	65874198	R	NM_004820	chr8:65710990-65711722	8	3.33	2.1	1.55	2.09	0.000857	0.0359	0.121	0.0368
cg00054243	1	52962900	F		chr1:53192023-53192428	1	0.0251	0.224	0.409	-0.548	0.98	0.822	0.683	0.583
cg00054301	16	65795049	F	NM_024712;NR_029887	chr16:67233032-67233862	16	-0.273	0.0132	-0.871	0.293	0.785	0.989	0.383	0.77
cg00054408	19	3226609	R	NM_021938	chr19:3275608-3275970	19	2.07	1.91	0.463	1.11	0.0385	0.0565	0.644	0.266
cg00054409	6	31455781	F			6	2.23	1.37	1.98	0.601	0.0257	0.17	0.0477	0.548
cg00054472	3	9827352	F	NM_001025930	chr3:9851476-9852171	3	-1.31	-1.51	-1.55	0.714	0.19	0.131	0.121	0.475
cg00054496	16	10763189	R	NM_002484		16	-0.132	-0.0594	0.367	-0.481	0.895	0.953	0.714	0.631
cg00054525	16	87245088	R	NM_000101	chr16:88716989-88717606	16	3.27	2.29	2.17	1.23	0.00108	0.022	0.0298	0.218
cg00054572	13	40245606	F		chr13:41345062-41345570	13	3.29	2.49	1.11	2	0.000995	0.0126	0.268	0.0457
cg00054639	2	211406864	R			2	0.866	-0.33	1.93	0.105	0.386	0.741	0.0541	0.916
cg00054741	19	58893059	F	NR_030193		19	2.46	1.37	1.26	1.62	0.0139	0.17	0.208	0.105
cg00054771	2	174910643	R		chr2:175199463-175202639	2	2.24	2.9	0.118	0.684	0.0251	0.00377	0.906	0.494
cg00054774	21	42246148	F	NM_015500	chr21:43373135-43374062	21	1.02	0.475	1.64	-0.203	0.306	0.635	0.102	0.839
cg00054971	10	129686927	R	NM_006504		10	1	-0.66	0.334	2.08	0.316	0.509	0.739	0.0372
cg00055052	16	4349749	R	NM_024535		16	-0.97	-0.119	-0.549	-1.03	0.332	0.905	0.583	0.303
cg00055233	9	5329677	F	NM_006911	chr9:5339026-5339678	9	-0.177	0.0066	-0.559	0.188	0.86	0.995	0.576	0.851
cg00055292	7	4813372	R	NM_018059	chr7:4848251-4849204	7	-0.948	0.178	-1.12	-0.796	0.343	0.859	0.263	0.426
cg00055341	2	200155090	R			2	-1.42	-1.12	-0.732	-0.586	0.157	0.262	0.464	0.558
cg00055359	2	133739680	F	NM_207363;NM_207481	chr2:134023947-134024467	2	-0.448	-0.0264	-1.28	0.398	0.654	0.979	0.2	0.691
cg00055434	1	2405204	R	NM_014638	chr1:2415198-2415506	1	1.69	1.27	0.99	0.659	0.0913	0.203	0.322	0.51
cg00055462	13	97821895	R	NM_005766		13	0.995	0.805	0.355	0.533	0.32	0.421	0.723	0.594
cg00055510	2	208616156	F			2	-1.08	-1.06	-0.85	0.015	0.28	0.291	0.395	0.988
cg00055529	17	34377361	F	NM_001008777		17	-0.702	-0.713	0.721	-1.08	0.483	0.476	0.471	0.279
cg00055603	1	48281426	R			1	4.52	3.26	2.51	2.04	6.25e-06	0.00112	0.0122	0.041
cg00055617	17	77866974	F	NM_006137	chr17:80277118-80277833	17	0.291	1.12	0.0968	-0.744	0.771	0.265	0.923	0.457
cg00055679	13	78068431	R		chr13:79170114-79171231	13	1.33	0.317	0.979	1.06	0.182	0.751	0.328	0.29
cg00055726	9	135435246	F	NM_001080515	chr9:136444127-136444604	9	-0.161	-0.422	-0.377	0.496	0.872	0.673	0.706	0.62
cg00055764	12	129527671	F	NM_015347		12	-1.54	-1.09	-1.4	-0.248	0.123	0.276	0.162	0.804
cg00055771	5	144490655	F			5	-1.6	0.567	-0.646	-2.71	0.11	0.57	0.519	0.00669
cg00055811	1	8465599	R	NM_012102;NM_001042681		1	3.66	1.83	2.36	2.2	0.000256	0.0676	0.0185	0.0277
cg00055981	9	138348558	F	NM_001145638;NM_015597	chr9:139228816-139229229	9	-1.53	-0.607	-2.05	-0.143	0.126	0.544	0.0399	0.887
cg00055986	5	2590520	R			5	2.31	1.28	0.334	2.28	0.0207	0.201	0.739	0.0224
cg00056002	16	87461497	R	NM_001080487	chr16:88937055-88937387	16	2.21	1.25	1.78	0.864	0.0273	0.21	0.0759	0.388
cg00056066	10	25050744	F	NM_020824	chr10:25011963-25013816	10	1.22	0.185	-0.527	2.32	0.224	0.853	0.598	0.0203
cg00056202	8	9828760	F		chr8:9791236-9791450	8	-2.23	-1.9	0.43	-2.17	0.0259	0.0574	0.667	0.0299
cg00056257	3	6876652	R	NM_181874;NM_000844	chr3:6902823-6903516	3	-0.952	0.0924	0.161	-1.84	0.341	0.926	0.872	0.0657
cg00056268	3	75913871	F	NM_001128223	chr3:75834254-75834761	3	-1.33	-0.713	-0.0215	-1.48	0.185	0.476	0.983	0.139
cg00056433	1	159658431	F			1	-0.963	-0.858	0.0323	-0.766	0.335	0.391	0.974	0.444
cg00056497	10	134635511	R			10	-2	-1.2	-0.936	-1.31	0.0455	0.23	0.349	0.191
cg00056541	6	164208613	R			6	1.1	0.495	-0.129	1.46	0.271	0.621	0.897	0.145
cg00056754	1	165330582	R	NM_001080426		1	-2.97	-1.45	-1.09	-2.55	0.00295	0.147	0.277	0.0106
cg00057208	2	219286393	F	NM_014640	chr2:219575448-219576080	2	2.35	1.82	1.65	0.631	0.0188	0.0686	0.0997	0.528
cg00057231	3	48606962	R	NM_000094	chr3:48631882-48632901	3	-4.1	-3.07	-1.48	-2.43	4.15e-05	0.00215	0.138	0.0149
cg00057240	2	191106605	R	NM_001142645	chr2:191399089-191399742	2	-0.44	-0.211	-0.194	-0.353	0.66	0.833	0.846	0.724
cg00057272	8	135795434	R	NM_020863	chr8:135724770-135725552	8	0.838	0.416	0.527	0.518	0.402	0.678	0.598	0.604
cg00057324	6	47858001	F	NM_181744		6	3.75	3.05	1.22	2.1	0.00018	0.0023	0.224	0.0361
cg00057434	10	28328030	F	NM_018076	chr10:28287447-28288057	10	-3.6	-1.31	-1.88	-3.06	0.000315	0.189	0.0597	0.00223
cg00057476	22	28038246	F	NM_152237;NM_006478;NM_152236	chr22:29709281-29712013	22	0.86	-0.224	0.226	1.48	0.39	0.822	0.821	0.139
cg00057517	10	131795644	F		chr10:131908731-131909886	10	2.49	2.39	0.764	1.06	0.0128	0.0169	0.445	0.29
cg00057569	10	95452538	F	NM_145246	chr10:95462160-95462500	10	-3.53	-0.798	-1.52	-3.79	0.00041	0.425	0.129	0.000149
cg00057593	8	143913961	R	NM_002066	chr8:143916135-143916405	8	1.32	0.112	1.75	0.563	0.187	0.911	0.0795	0.573
cg00057603	20	1664270	F		chr20:1716330-1716653	20	-0.167	-0.422	0.226	-0.0451	0.867	0.673	0.821	0.964
cg00057667	6	140111423	R			6	4.57	2.72	2.59	2.61	4.97e-06	0.00656	0.00952	0.00914
cg00057722	18	44188154	F		chr18:45934453-45937265	18	0.0738	0.884	-0.28	-0.541	0.941	0.377	0.78	0.589
cg00057966	17	53763693	F	NR_029683		17	3.36	2.59	1.58	1.59	0.000785	0.00969	0.113	0.111
cg00058009	4	123073143	R	NM_003305;NM_001130698	chr4:122853554-122854169	4	-2.37	-1.67	-1.32	-1.11	0.0176	0.095	0.186	0.266
cg00058026	12	51458425	F	NM_015848		12	4.36	3.16	2.12	2.22	1.29e-05	0.00157	0.034	0.0262
cg00058163	18	5881948	R	NM_001080209	chr18:5890292-5891682	18	1.54	0.937	1.6	0.21	0.125	0.349	0.109	0.833
cg00058291	1	227040756	F			1	-1.06	-0.93	-1.31	0.323	0.288	0.352	0.189	0.747
cg00058299	1	113299716	R	NM_001166496;NM_003051;NM_001166496	chr1:113497986-113498206	1	-1.36	-0.673	-1.07	-0.659	0.174	0.501	0.287	0.51
cg00058413	5	118299170	F	NM_173666		5	3.64	2.84	1.47	1.92	0.000269	0.00455	0.14	0.0554
cg00058515	2	80381309	F	NM_004389;NM_001164883	chr2:80529677-80530846	2	0.83	0.957	0.118	0.308	0.406	0.339	0.906	0.758
cg00058644	17	77437319	F		chr17:79846204-79846486	17	-2.35	-0.587	-1.37	-2.16	0.0186	0.557	0.172	0.0311
cg00058708	2	24016072	F	NM_181713	chr2:24163185-24163878	2	1.21	1.45	0.624	-0.015	0.228	0.147	0.533	0.988
cg00058857	3	101410681	R			3	1.7	1.35	1.11	0.503	0.0889	0.178	0.268	0.615
cg00058879	22	38412119	F	NM_001003406;NM_021096	chr22:40081519-40082390	22	0.922	0.673	0.344	0.556	0.357	0.501	0.731	0.578
cg00058887	4	185146012	F	NM_020225		4	-2.75	-2.11	-1.84	-0.834	0.00599	0.0347	0.0658	0.404
cg00058923	1	159335791	F	NM_152366;NM_001007255;NM_001007256	chr1:161068062-161068801	1	3.16	2.54	0.904	1.91	0.00158	0.0111	0.366	0.0564
cg00058938	19	45416573	R	NM_152479	chr19:40723104-40724389	19	0.398	0.567	-0.151	0.218	0.691	0.57	0.88	0.828
cg00059015	1	60113133	F	NM_015888		1	3.02	2.86	1.84	0.533	0.0025	0.00428	0.0658	0.594
cg00059024	15	88034621	R	NM_020212;NM_003847	chr15:90233530-90234083	15	-2.62	-1.27	-1.47	-1.81	0.00878	0.205	0.14	0.0702
cg00059034	1	98286670	F		chr1:98510966-98511710	1	-2.66	-1.42	-0.979	-2.16	0.00771	0.156	0.328	0.0305
cg00059053	12	3472423	F	NM_019854	chr12:3599966-3603008	12	-1.63	-0.408	-1.13	-1.32	0.103	0.683	0.259	0.186
cg00059089	2	152971534	R	NM_052905		2	1.07	1.05	-0.151	0.856	0.284	0.294	0.88	0.392
cg00059161	3	166389721	F	NM_014926		3	-0.486	-0.66	-0.0968	-0.0526	0.627	0.509	0.923	0.958
cg00059225	5	151284550	F	NM_000171;NM_001146040;NM_000171;NM_001146040	chr5:151304226-151304824	5	2.25	1.23	0.764	1.85	0.0243	0.217	0.445	0.0646
cg00059246	12	52624196	F	NM_017410	chr12:54338761-54339168	12	0.0401	-0.297	-0.785	1.07	0.968	0.767	0.432	0.285
cg00059309	17	75907992	F	NM_020954;NM_020914		17	-0.384	0.238	-0.0646	-0.834	0.701	0.812	0.949	0.404
cg00059374	17	21418349	F			17	0.62	0.125	-0.592	1.43	0.535	0.9	0.554	0.151
cg00059399	5	2061272	R		chr5:2008187-2008428	5	1.52	1.31	0.516	0.759	0.129	0.191	0.606	0.448
cg00059459	1	8266162	R			1	3.67	2.63	2.5	1.28	0.000239	0.00847	0.0126	0.202
cg00059643	5	180595247	F	NM_201627;NM_033549	chr5:180661182-180661555	5	0.533	0.475	-0.194	0.578	0.594	0.635	0.846	0.563
cg00059652	17	65117093	F			17	-2.41	-0.996	-2.22	-1.09	0.0158	0.319	0.0267	0.276
cg00059699	12	10347055	R	NM_001114396		12	3.86	2.48	2.59	1.66	0.000114	0.0131	0.00952	0.0969
cg00059707	10	2530911	F		chr10:2543463-2544121	10	-0.0195	1.09	0.301	-1.42	0.984	0.276	0.763	0.156
cg00059737	1	12323021	R	NM_015378;NM_018156		1	1.31	1.22	-0.0323	0.984	0.189	0.222	0.974	0.325
cg00059854	2	236108596	F	NM_014914;NM_001037131	chr2:236443815-236444025	2	0.539	0.257	-0.0861	0.72	0.59	0.797	0.931	0.471
cg00059879	15	47321984	F	NM_001001556;NM_002044		15	2.72	1.76	1.22	1.68	0.00657	0.0776	0.222	0.0924
cg00059930	13	47792383	R	NM_000321	chr13:48892635-48893857	13	-0.306	0.409	-0.28	-0.691	0.759	0.682	0.78	0.49
cg00060304	11	31793813	R	NM_001127612	chr11:31831620-31839038	11	1.56	0.858	0.463	1.33	0.12	0.391	0.644	0.184
cg00060374	1	1345098	R	NR_026871;NM_001145210	chr1:1355159-1356000	1	-0.589	-1.23	-1.31	1.43	0.556	0.22	0.189	0.154
cg00060403	17	46585876	R	NM_000269;NM_001018136;NM_198175	chr17:49230686-49231247	17	-2.95	-2	-1.75	-1.37	0.00316	0.0456	0.0795	0.172
cg00060484	4	3257396	R			4	-1.53	0.139	0.129	-2.84	0.125	0.89	0.897	0.00452
cg00060605	5	139757245	R		chr5:139780307-139782108	5	1.8	1.77	0.516	0.759	0.0715	0.077	0.606	0.448
cg00060627	2	17976202	R	NM_002252		2	2.47	1.18	1.88	1.29	0.0134	0.238	0.0597	0.196
cg00060641	10	46555262	R	NR_003277		10	-0.395	0.264	-0.441	-0.548	0.693	0.792	0.659	0.583
cg00060649	12	66215067	F			12	-3.2	-0.521	-2.71	-2.46	0.00138	0.602	0.0067	0.0137
cg00060715	1	212846280	F	NM_016343	chr1:214778908-214779709	1	-0.999	-0.838	0	-0.82	0.318	0.402	1	0.412
cg00060800	5	141581178	R			5	-0.0549	-0.112	0.377	-0.308	0.956	0.911	0.706	0.758
cg00060836	8	67996866	R	NR_002599	chr8:67837480-67837954	8	0.765	-0.0924	1.21	0.323	0.445	0.926	0.228	0.747
cg00060882	X	23982732	F	NM_001415	chrX:24072558-24073135	23	1.77	1.41	0.624	0.969	0.0775	0.158	0.533	0.333
cg00060956	1	42982163	F			1	2.5	1.43	0.129	2.63	0.0124	0.154	0.897	0.00856
cg00060975	4	140319218	R		chr4:140097251-140099836	4	-3.07	-1.92	-0.613	-2.64	0.00217	0.0548	0.54	0.00819
cg00061031	9	99783847	R	NM_006401	chr9:100744982-100747768	9	-1	-0.858	-0.624	-0.255	0.316	0.391	0.533	0.798
cg00061039	4	187423947	R	NM_000128		4	3.54	2.8	1.44	1.82	0.000393	0.00515	0.149	0.0691
cg00061059	19	14501983	R	NM_138501	chr19:14639879-14641040	19	-2.2	-1.06	-2.45	-0.453	0.0279	0.291	0.0142	0.651
cg00061185	12	48882614	R	NM_001113546;NM_016357;NM_001113547		12	2.7	2.21	2.11	0.421	0.00685	0.0271	0.035	0.674
cg00061264	3	23827779	R	NM_003341;NM_182666	chr3:23851987-23852508	3	-0.251	-0.627	0.366	-0.0977	0.802	0.531	0.715	0.922
cg00061413	5	167939917	R	NM_024594	chr5:168006098-168006918	5	-2.32	-2.54	-1.71	0.21	0.0202	0.0111	0.0871	0.833
cg00061520	16	4010372	F	NM_001116		16	3.21	1.33	2.54	1.8	0.00134	0.183	0.0111	0.0726
cg00061551	16	5061152	F	NM_019109	chr16:5121749-5122192	16	-2.32	-0.904	-0.667	-2.39	0.0203	0.366	0.505	0.0167
cg00061629	11	44281834	R	NM_021926	chr11:44325657-44326517	11	0.737	-0.442	-0.301	1.96	0.461	0.658	0.763	0.0499
cg00061635	17	8252561	F			17	0.158	0.713	0.151	-0.601	0.875	0.476	0.88	0.548
cg00061678	1	169043343	R			1	2.62	3.23	1.02	0.18	0.00885	0.00125	0.306	0.857
cg00061679	Y	23723559	R	NM_004081;NM_020420;NM_001005375		24	0.127	1.93	-0.969	-0.924	0.899	0.053	0.333	0.356
cg00061695	17	7252038	R	NM_020795	chr17:7311672-7312063	17	-0.478	0.178	0.14	-1.11	0.633	0.859	0.889	0.266
cg00061764	3	67647122	F	NM_003848		3	2.84	2.22	1.88	0.834	0.00458	0.0266	0.0597	0.404
cg00061792	10	51212265	R			10	4.83	3.14	2.67	2.55	1.35e-06	0.00168	0.00762	0.0106
cg00062020	1	84873407	F	NR_027379		1	2.81	2.71	0.74	1.28	0.005	0.00674	0.46	0.2
cg00062070	15	34718958	F	NM_001130010;NM_032499		15	3.66	2.24	2.11	2.01	0.000251	0.0253	0.035	0.0449
cg00062119	8	30889406	F		chr8:30769264-30770122	8	1.04	0.177	0.441	1.17	0.3	0.859	0.659	0.241
cg00062245	17	39817786	R	NM_000419	chr17:42462135-42463579	17	-2.65	-0.607	-2	-2.07	0.0081	0.544	0.0454	0.0381
cg00062282	22	49089941	R	NM_012401	chr22:50745415-50746125	22	0.829	0.911	0.161	0.315	0.407	0.363	0.872	0.752
cg00062285	3	100675734	F			3	3.04	2.18	1.02	1.98	0.00233	0.0294	0.307	0.0474
cg00062356	12	56373811	R	NM_001017958;NM_001017957;NM_001017956;NM_006812	chr12:58087531-58088029	12	-3.58	-1.5	-1.75	-2.94	0.000348	0.134	0.0795	0.00331
cg00062367	14	69019869	F	NM_001161498	chr14:69950459-69951916	14	1.5	2.02	1.71	-1.06	0.134	0.0435	0.0871	0.29
cg00062437	22	22058539	R		chr22:23730282-23730537	22	-0.605	-1.29	-0.667	0.901	0.546	0.196	0.505	0.367
cg00062736	15	97989206	R	NM_001130927;NM_001130926;NM_001130928;NM_005587		15	0.826	0.746	1.03	-0.285	0.409	0.456	0.302	0.775
cg00062873	7	124552707	R			7	2.92	1.95	1.18	1.87	0.00352	0.0516	0.239	0.0614
cg00063006	6	32955508	R	NR_027771	chr6:32847498-32847846	6	-0.0839	0.119	0.161	-0.406	0.933	0.905	0.872	0.685
cg00063040	12	130627490	R			12	-0.992	-0.224	-0.689	-0.834	0.321	0.822	0.491	0.404
cg00063066	6	126703021	R	NM_001012507;NM_001012507	chr6:126661135-126661387	6	-4.28	-2.92	-1.07	-3.25	1.89e-05	0.00346	0.287	0.00114
cg00063077	1	101133240	F	NM_001144884;NM_001033025;NM_001439;NM_133496	chr1:101360588-101360832	1	-2.22	-2.26	-2.26	0.578	0.0266	0.024	0.0239	0.563
cg00063111	3	39423956	R	NR_002325;NM_002295;NM_001012321	chr3:39447890-39448644	3	-2.44	-1.04	-1.83	-1.42	0.0148	0.297	0.0674	0.156
cg00063144	17	36807581	R	NM_002277		17	3.06	2.01	1.4	1.84	0.00225	0.0442	0.162	0.0657
cg00063246	8	55405389	F			8	2.69	1.54	0.753	2.28	0.00713	0.124	0.451	0.0224
cg00063346	1	226555912	R	NM_052843;NM_001098623		1	-2.64	-2.09	-0.247	-2.08	0.00826	0.0371	0.805	0.0375
cg00063369	2	213519723	F			2	3.64	3.07	1.9	1.28	0.000278	0.00215	0.0569	0.199
cg00063456	1	229585148	R	NM_022051		1	2.21	2.08	-0.387	1.92	0.0273	0.0377	0.699	0.0554
cg00063471	15	49173262	R	NM_207381	chr15:51385861-51387203	15	-0.262	-1.42	0.118	0.916	0.793	0.156	0.906	0.359
cg00063477	Y	21151183	F	NM_004681	chrY:22737825-22738052	24	2.11	2.4	1.16	0.0601	0.0349	0.0163	0.248	0.952
cg00063503	8	145793707	F	NM_025251	chr8:145823490-145823696	8	0.0448	0.277	-1.14	0.797	0.964	0.782	0.254	0.426
cg00063535	12	112213874	R	NM_001143819;NM_017901		12	-0.0983	-0.31	-0.85	0.901	0.922	0.756	0.395	0.367
cg00063699	1	212690865	F	NM_005401		1	4.75	2.91	2.7	2.62	2.05e-06	0.00361	0.00692	0.00875
cg00063734	15	66048188	F		chr15:68260501-68260710	15	2.74	0.805	1.37	2.58	0.00613	0.421	0.172	0.00976
cg00063748	1	3342846	R	NM_199454;NM_022114	chr1:3351365-3351632	1	-1.97	-0.145	0.506	-3.61	0.0488	0.885	0.613	0.000302
cg00063773	3	143797183	F	NM_001145319	chr3:142315171-142315567	3	-0.141	0.356	0.764	-1.28	0.888	0.722	0.445	0.202
cg00063828	16	84306997	F	NM_206967		16	-1.72	-1.35	-1.31	-0.361	0.0848	0.178	0.189	0.718
cg00063909	2	64730510	F	NM_014755	chr2:64880319-64881868	2	2.57	1.93	0.689	1.74	0.0101	0.0532	0.491	0.0827
cg00063979	5	139055470	F		chr5:139076542-139077179	5	0.842	1.17	-0.108	0.308	0.4	0.243	0.914	0.758
cg00063982	1	52813079	R			1	1.02	0.917	-0.807	1.49	0.306	0.359	0.42	0.137
cg00064020	3	185377455	F	NM_004068;NM_001025205	chr3:183892455-183893184	3	0.965	0.172	-0.678	2.04	0.335	0.864	0.498	0.041
cg00064080	10	122588244	R			10	2.28	1.94	2.12	-0.0225	0.0226	0.0524	0.034	0.982
cg00064255	1	89872600	R	NM_032270	chr1:90098230-90099292	1	-1.78	-1.24	-1	-0.841	0.0748	0.215	0.317	0.4
cg00064261	1	227636680	F	NM_001100	chr1:229567206-229570684	1	1.14	0.911	-0.226	1.19	0.253	0.363	0.821	0.235
cg00064296	8	88781119	R			8	3.47	1.79	2.36	1.92	0.000526	0.0737	0.0185	0.0545
cg00064415	17	28349585	R			17	-3.63	-3.09	-2.18	-1.01	0.000281	0.00197	0.029	0.314
cg00064589	10	29931290	R	NR_030634;NM_021738;NM_003174		10	3.61	2.78	2.84	0.721	0.000304	0.00547	0.00451	0.471
cg00064778	5	126592641	R		chr5:126564997-126565580	5	-0.542	-0.308	0.409	-0.954	0.588	0.758	0.683	0.34
cg00064840	7	4751011	F	NM_001037165	chr7:4784820-4785058	7	0.76	0.363	0.312	0.631	0.447	0.717	0.755	0.528
cg00065048	1	27834624	F	NM_005248	chr1:27960567-27961023	1	1.17	0.937	0.323	0.721	0.242	0.349	0.747	0.471
cg00065215	1	18831855	R	NM_013945;NM_002584;NM_001135254	chr1:18956895-18959829	1	-2.41	-2.7	-1.34	-0.0977	0.0159	0.00696	0.179	0.922
cg00065226	8	7176990	R	NR_027423		8	2.28	2.01	1.79	0.195	0.0226	0.0442	0.0741	0.845
cg00065302	21	29288121	R	NM_015565	chr21:30364965-30365342	21	1.03	-0.271	0.398	1.66	0.304	0.787	0.691	0.0969
cg00065368	16	3708921	R	NM_016292	chr16:3766977-3767935	16	2.9	2.32	2.02	0.714	0.00371	0.0202	0.0431	0.475
cg00065396	6	26702757	F		chr6:26596046-26596321	6	-0.286	-0.244	-0.0646	-0.173	0.775	0.807	0.949	0.863
cg00065569	1	113468390	R	NM_014813		1	2.81	2.42	1.72	0.736	0.00489	0.0157	0.0852	0.462
cg00065570	8	145612799	R	NM_130849;NM_017767	chr8:145641915-145642118	8	-1.94	-0.917	-0.915	-1.52	0.0524	0.359	0.36	0.129
cg00065957	1	52871940	R	NM_001042693	chr1:53098629-53099303	1	-0.185	-0.383	1	-0.796	0.854	0.702	0.317	0.426
cg00066184	3	120146387	F	NM_001015887;NM_152538		3	3.35	2.36	1.17	2.18	0.000802	0.0182	0.241	0.0294
cg00066239	17	76086754	R			17	-1.74	-0.752	-1.57	-0.774	0.0818	0.452	0.116	0.439
cg00066270	1	184531893	F	NM_005807;NM_001127710;NM_001127708;NM_001127709;NR_031642		1	-0.0111	0.376	-0.0861	-0.331	0.991	0.707	0.931	0.741
cg00066351	7	149761484	R			7	3.88	1.54	2.45	2.79	0.000104	0.123	0.0142	0.00532
cg00066360	17	1321400	F	NM_001080779;NM_033375;NM_001080950	chr17:1375216-1375460	17	4.62	2.88	1.53	3.47	3.77e-06	0.00393	0.127	0.00052
cg00066508	12	108839985	R	NM_001143852;NM_032300		12	3	2.71	1.1	1.29	0.0027	0.00669	0.272	0.196
cg00066512	12	61485979	R	NM_020700	chr12:63195657-63195909	12	4.06	2.38	2.22	2.44	4.88e-05	0.0175	0.0267	0.0146
cg00066627	6	25801118	F	NM_006998		6	-0.744	-0.271	-0.355	-0.661	0.457	0.787	0.723	0.509
cg00066748	8	486527	F	NM_175075	chr8:494155-496083	8	3.05	1.2	1.61	2.49	0.00228	0.23	0.108	0.0128
cg00066750	6	126121825	F	NM_012259	chr6:126080334-126080831	6	2.66	2.36	2.35	-0.015	0.00787	0.0185	0.019	0.988
cg00066816	5	158690931	F	NM_002187	chr5:158758474-158758839	5	-2.78	-0.977	-1.42	-2.43	0.00543	0.329	0.156	0.0153
cg00066817	18	70906295	F	NM_017757		18	3.68	2.68	1.74	1.9	0.000235	0.00738	0.0813	0.0574
cg00066828	17	1784362	F		chr17:1837587-1837859	17	1.08	0.442	0.0646	1.31	0.28	0.658	0.949	0.191
cg00066854	10	113977366	F			10	0.328	1.5	1.09	-1.95	0.743	0.132	0.277	0.0508
cg00066942	2	149117918	R	NM_015630	chr2:149401671-149403498	2	0.457	0.106	-0.0861	0.736	0.648	0.916	0.931	0.462
cg00067058	1	27093478	F	NM_022078	chr1:27216161-27217045	1	2.45	2.28	0.99	0.916	0.0141	0.0228	0.322	0.359
cg00067124	3	15441691	F	NM_152396	chr3:15468932-15469432	3	4.96	3.67	2.31	2.53	7.17e-07	0.000244	0.0207	0.0114
cg00067141	15	28717791	R	NM_001039841		15	-5.7	-2.8	-1.97	-4.99	1.18e-08	0.00515	0.049	6.1e-07
cg00067196	1	202455865	F	NM_014935		1	0.357	-0.304	-0.925	1.73	0.721	0.761	0.355	0.084
cg00067274	4	155532706	R	NM_017639;NM_001142552		4	1.21	2.3	-0.151	-0.203	0.226	0.0213	0.88	0.839
cg00067414	6	151229774	R	NM_015440	chr6:151186747-151188112	6	0.00607	0.0396	0.204	-0.21	0.995	0.968	0.838	0.833
cg00067471	19	1192377	R	NM_001001975;NM_001687	chr19:1241619-1242569	19	-2.15	-1.76	-1.18	-0.766	0.0318	0.0792	0.237	0.444
cg00067518	1	7685812	R	NM_015215	chr1:7764593-7765856	1	-1.49	-1.37	-1.51	0.225	0.137	0.172	0.132	0.822
cg00067528	2	71044675	F	NM_001692	chr2:71192094-71192495	2	2.71	1.74	1.56	1.4	0.00671	0.0827	0.119	0.16
cg00067588	10	10601713	F			10	2.28	1.78	1.13	1.01	0.0227	0.0759	0.259	0.311
cg00067600	3	34084145	R			3	0.523	-0.145	-0.0323	1.06	0.601	0.885	0.974	0.29
cg00067720	5	67556897	R	NM_181523		5	-2.52	-1.72	-1.41	-1.23	0.0117	0.085	0.159	0.218
cg00067742	2	1905895	R	NM_015025		2	1.12	1.12	0.484	0.308	0.263	0.265	0.628	0.758
cg00067758	6	92242511	F			6	-0.0431	0.528	-0.377	-0.285	0.966	0.598	0.706	0.775
cg00067768	3	185369368	R	NM_004423	chr3:183887815-183888478	3	3.59	2.1	1.45	2.6	0.00033	0.0353	0.146	0.00935
cg00067824	10	23532920	R			10	1.37	-0.178	0.958	1.65	0.171	0.859	0.338	0.0999
cg00067884	15	61757251	F	NM_003922		15	3.01	1.99	2.28	1.01	0.00262	0.0463	0.0226	0.314
cg00068038	2	36542068	F	NM_016441		2	0.952	0.818	1.13	-0.233	0.341	0.413	0.259	0.816
cg00068102	2	121335731	F	NM_005270		2	0.125	0.343	0.581	-0.654	0.9	0.732	0.561	0.513
cg00068153	1	199295225	R	NM_000069		1	2.2	1.95	1.84	0.0751	0.028	0.0516	0.0658	0.94
cg00068155	3	133236821	R	NM_130808	chr3:131753880-131754139	3	-0.161	-0.495	-0.215	0.428	0.872	0.621	0.83	0.669
cg00068160	13	94160972	F	NM_007084;NM_007084	chr13:95363152-95366051	13	-2.11	-1.15	-0.936	-1.54	0.0352	0.251	0.349	0.124
cg00068305	5	122875579	F	NM_001044723;NM_004384;NM_001031812;NM_001044722	chr5:122847661-122848292	5	-3.24	-2.31	-0.656	-2.49	0.00121	0.0209	0.512	0.0126
cg00068316	9	106769498	R		chr9:107730500-107730867	9	0.403	0.6	0.409	-0.3	0.687	0.548	0.683	0.764
cg00068408	5	24680635	R	NM_006727;NM_006727		5	-2.88	-2.71	-0.958	-1.21	0.004	0.00669	0.338	0.227
cg00068412	1	42279415	R			1	4.43	3.31	2.33	2	9.33e-06	0.000921	0.0196	0.0457
cg00068428	8	49657277	F			8	-1.56	-1.01	0.71	-2.21	0.119	0.313	0.478	0.0272
cg00068433	1	16412717	R	NM_153213	chr1:16543683-16544307	1	2.2	2.33	1.09	0.346	0.0279	0.0198	0.277	0.73
cg00068622	5	79819410	F	NM_205548	chr5:79783635-79784145	5	-1.75	-0.442	-0.775	-1.82	0.0793	0.658	0.439	0.0691
cg00068684	16	24293857	R			16	-0.22	-0.719	0.14	0.248	0.826	0.472	0.889	0.804
cg00068750	16	2475956	F	NM_020705		16	1.68	1.75	-0.29	1.28	0.0936	0.0804	0.771	0.202
cg00068810	4	76076987	F	NM_015393	chr4:75858300-75859931	4	-0.685	-0.62	-0.721	0.12	0.494	0.535	0.471	0.904
cg00068909	4	104158414	R	NM_139173;NM_001100874	chr4:103940668-103940951	4	3.14	2.07	2.52	0.939	0.00169	0.0383	0.0118	0.348
cg00069002	1	33545323	R		chr1:33772146-33773104	1	1.28	-0.429	-0.0538	2.65	0.199	0.668	0.957	0.00801
cg00069003	5	140144290	R		chr5:140165958-140166214	5	2.17	2.26	1.05	0.398	0.0298	0.0236	0.292	0.691
cg00069014	1	14029427	R			1	3.02	2.45	1.01	1.68	0.00252	0.0144	0.312	0.0939
cg00069309	6	18039976	F	NM_022113;NM_001105567;NM_001105568;NM_001105566		6	4.21	2.6	2.83	1.92	2.59e-05	0.00933	0.00466	0.0554
cg00069314	4	170778614	F	NM_001829;NM_173872;NM_001829;NM_173872	chr4:170541251-170541810	4	-2.64	-1.79	-1.31	-1.44	0.00828	0.0727	0.189	0.149
cg00069391	7	3385831	F	NM_152744		7	4.06	2.59	1.7	2.67	4.84e-05	0.00951	0.0891	0.00749
cg00069432	8	99905564	R	NM_006281	chr8:99837461-99837936	8	3.2	2.71	0.194	2.42	0.00139	0.00669	0.846	0.0156
cg00069642	5	141042674	R	NM_022481		5	2.47	2.02	1.9	0.398	0.0136	0.0435	0.0569	0.691
cg00069771	1	231155898	R	NM_032324	chr1:233086191-233086595	1	-2.19	-2.3	-1.94	0.383	0.0283	0.0213	0.0528	0.702
cg00069815	8	846058	R			8	3.99	2.72	1.16	2.91	6.48e-05	0.00656	0.245	0.00363
cg00069969	13	32544763	F			13	3.25	2.21	1.94	1.49	0.00115	0.0271	0.0528	0.135
cg00070042	9	132298415	R		chr9:133308593-133309448	9	-2.06	-1.61	-1.17	-0.774	0.0397	0.107	0.241	0.439
cg00070052	9	115211793	R	NR_027261;NM_152786;NM_017443	chr9:116172303-116173090	9	-0.661	-0.416	-0.624	-0.135	0.509	0.678	0.533	0.892
cg00070162	1	91625379	R	NM_001017975		1	3.37	2.61	1.83	1.37	0.000761	0.00915	0.0674	0.169
cg00070181	6	2412819	R			6	2.82	1.91	2.12	0.924	0.00476	0.0565	0.034	0.356
cg00070235	16	1622447	F	NM_020825		16	0.0932	-0.376	-0.312	0.819	0.926	0.707	0.755	0.413
cg00070242	2	91034638	F		chr2:91669439-91671565	2	0.57	0.0408	0.573	0.415	0.569	0.967	0.567	0.678
cg00070318	6	166501262	F	NM_003181	chr6:166579973-166583423	6	-0.554	0.033	-1.27	0.15	0.58	0.974	0.204	0.881
cg00070370	15	81236081	F	NM_001007122		15	3.82	2.51	2.58	1.57	0.000136	0.0122	0.00982	0.116
cg00070383	4	174665949	F		chr4:174430386-174430861	4	-1.1	-0.897	-0.0108	-0.924	0.27	0.37	0.991	0.356
cg00070460	4	1217676	R	NM_001328;NM_001012614	chr4:1229249-1229501	4	2.15	1.45	0.172	1.97	0.0318	0.147	0.863	0.0491
cg00070529	13	42884655	R	NM_017993;NM_001127615		13	3.95	1.93	1.74	3.13	7.69e-05	0.0532	0.0813	0.00173
cg00070542	X	79716751	R		chrX:79830094-79830539	23	-1.12	-0.858	-0.871	-0.24	0.261	0.391	0.383	0.81
cg00070715	5	138842980	F	NM_198282		5	-3.55	-2.45	-2	-1.69	0.000384	0.0141	0.0454	0.091
cg00070870	6	30799874	R	NM_178014	chr6:30687941-30688213	6	0.235	-0.554	-0.925	1.78	0.814	0.579	0.355	0.075
cg00070899	6	34132457	R	NM_000841	chr6:34024201-34024457	6	1.93	0.891	1.12	1.34	0.0538	0.373	0.263	0.179
cg00070912	20	46447221	F		chr20:47013682-47013970	20	-2.83	-0.495	-1.15	-3.25	0.00463	0.621	0.25	0.00117
cg00071012	15	19943412	F			15	-1.54	-1.56	-1.22	0.0751	0.123	0.118	0.224	0.94
cg00071026	13	112698937	F	NM_001112732;NM_024979	chr13:113648343-113649601	13	1.59	0.409	0.151	2.12	0.112	0.682	0.88	0.0341
cg00071045	2	97573622	F	NM_025190	chr2:98206120-98207224	2	-0.815	0.125	0.334	-1.8	0.415	0.9	0.739	0.0726
cg00071051	6	44330823	F	NM_178148	chr6:44224698-44225486	6	1.09	0.779	0.172	0.879	0.276	0.436	0.863	0.379
cg00071137	22	37426022	F	NM_014876;NM_014876	chr22:39096373-39097754	22	-3.72	-1.79	-2.65	-2.1	0.000198	0.0737	0.00813	0.0361
cg00071161	6	44225551	R	NM_018426	chr6:44119526-44119781	6	1.68	1.38	0.194	1.23	0.0933	0.167	0.846	0.218
cg00071210	6	148778635	R	NM_015278		6	-1.25	0.139	-0.796	-1.55	0.211	0.89	0.426	0.122
cg00071241	7	41318064	F			7	1.95	1.12	1.82	0.533	0.0508	0.262	0.069	0.594
cg00071250	1	170894886	R	NM_000639;NM_000639		1	4.95	2.97	2.74	2.85	7.6e-07	0.00298	0.00608	0.00431
cg00071360	20	36784207	F		chr20:37352130-37357372	20	-1.08	-0.205	-0.581	-1.1	0.28	0.838	0.561	0.273
cg00071381	1	119712097	R	NM_016527;NM_001005783		1	2.86	1.49	1.87	1.63	0.00426	0.136	0.0612	0.103
cg00071391	4	126779964	R			4	-0.889	-0.0792	-1.14	-0.413	0.374	0.937	0.254	0.679
cg00071446	3	121507946	F		chr3:120025415-120026241	3	4.84	2.55	2.47	3.34	1.32e-06	0.0107	0.0133	0.000852
cg00071618	16	86203168	R	NM_020655	chr16:87648086-87648688	16	3.44	3.51	0.57	1.67	0.000589	0.000447	0.569	0.0954
cg00071658	13	71306748	R	NM_004392;NM_080760;NM_080759		13	2.52	2.19	2.4	-0.128	0.0118	0.0285	0.0164	0.898
cg00071727	13	97667895	F	NM_005766;NM_001001715		13	-1.18	-1.46	0.678	-1.07	0.239	0.145	0.498	0.283
cg00071869	3	143082592	R	NM_001679	chr3:141594486-141596288	3	1.85	1.13	0.345	1.65	0.0637	0.256	0.73	0.0999
cg00071887	15	72005582	F	NM_005576	chr15:74218696-74220373	15	0.583	1.63	0.871	-1.46	0.56	0.103	0.383	0.143
cg00071950	4	9629980	R	NM_020041;NM_001001290	chr4:10020481-10021026	4	0.981	1.37	0.936	-0.578	0.326	0.172	0.349	0.563
cg00071984	3	60592544	R	NM_001166243;NM_002012		3	2.11	0.396	0.022	3.13	0.0347	0.692	0.982	0.00173
cg00072288	X	152853686	R	NM_003491	chrX:153199952-153200924	23	-0.66	0.442	-1.14	-0.563	0.509	0.658	0.254	0.573
cg00072407	19	12748524	F	NM_001100176;NM_013312	chr19:12889083-12889343	19	2.18	1.9	0.828	0.992	0.0289	0.0574	0.407	0.321
cg00072426	16	85150013	F		chr16:86588435-86589513	16	-1.43	-0.891	-0.689	-0.886	0.152	0.373	0.491	0.375
cg00072587	X	19441488	F	NM_001001671	chrX:19533003-19533551	23	-0.0835	-0.125	0.559	-0.503	0.933	0.9	0.576	0.615
cg00072675	1	56715216	R		chr1:56943401-56943669	1	-2.27	-1	-1.08	-1.85	0.023	0.316	0.282	0.0646
cg00072689	17	44036110	R	NR_033204;NR_033201;NM_018952		17	-2.45	-1.92	-1.16	-1.13	0.0142	0.0548	0.245	0.26
cg00072720	17	7106555	R	NM_001307	chr17:7164285-7166245	17	-1.76	-1.46	-1.01	-0.567	0.0786	0.145	0.312	0.571
cg00072799	X	78314338	R	NM_032553;NM_032553		23	2.08	2.18	1.55	-0.0977	0.0372	0.0294	0.121	0.922
cg00073003	13	111772584	F	NM_005986;NM_005986	chr13:112726281-112728419	13	0.793	0.812	0.678	-0.0977	0.428	0.417	0.498	0.922
cg00073090	19	1216879	F		chr19:1265854-1269943	19	1.81	1.44	0.936	0.736	0.0709	0.15	0.349	0.462
cg00073244	1	3518968	F	NM_001409	chr1:3527619-3528078	1	-0.505	0.271	0.441	-1.52	0.613	0.787	0.659	0.129
cg00073384	1	246410274	R	NM_001004688		1	-2.15	-1.1	-1.07	-1.55	0.0316	0.27	0.287	0.122
cg00073460	6	149848195	F	NM_207360		6	0.289	1.18	1.11	-1.71	0.773	0.238	0.268	0.0882
cg00073543	1	38714469	R		chr1:38941919-38942404	1	0.998	0.066	0.527	1.15	0.318	0.947	0.598	0.25
cg00073549	16	86166579	R			16	2.02	1.31	1.47	0.744	0.0439	0.189	0.14	0.457
cg00073650	16	87449667	F	NM_000512;NM_016209	chr16:88922671-88923976	16	-0.84	-0.317	-0.785	-0.398	0.401	0.751	0.432	0.691
cg00073713	7	97638868	R	NM_014916	chr7:97800780-97801030	7	1.69	1.46	0.14	1.22	0.0905	0.145	0.889	0.221
cg00073794	2	29894842	R	NM_004304		2	0.606	-0.343	-1.09	2.33	0.545	0.732	0.277	0.0199
cg00074086	7	4868311	R	NM_020144;NM_018059	chr7:4901336-4901753	7	0.744	0.119	0.355	0.819	0.457	0.905	0.723	0.413
cg00074145	15	50862797	F	NM_004498	chr15:53076187-53077926	15	-1.25	-0.825	-0.0968	-1.17	0.212	0.409	0.923	0.243
cg00074313	2	179079588	F	NR_031666		2	4.51	3.11	2.59	2.11	6.37e-06	0.00184	0.00952	0.0348
cg00074348	11	56762849	F	NM_005161;NR_027991		11	0.186	1.99	-0.312	-1.45	0.853	0.047	0.755	0.147
cg00074365	2	63941983	F	NM_001001521;NM_006759		2	-0.121	0.165	-0.367	-0.0526	0.904	0.869	0.714	0.958
cg00074379	1	152511912	F	NM_006118;NM_001018837	chr1:154244710-154245289	1	-2.22	-0.752	-1.04	-2.05	0.0262	0.452	0.297	0.0403
cg00074471	2	178517775	R	NM_001077197;NM_016953		2	1.3	1.33	-0.0968	0.894	0.195	0.183	0.923	0.371
cg00074746	6	116888487	R	NM_001010919	chr6:116783067-116783678	6	4.08	2.88	2.43	1.77	4.44e-05	0.00401	0.015	0.0763
cg00074771	15	41907633	F	NM_024908;NM_001167941	chr15:44119074-44119277	15	4.14	2.83	1.52	2.71	3.55e-05	0.00464	0.129	0.00669
cg00074818	8	8597837	R	NM_194284	chr8:8559131-8560867	8	0.943	0.977	1.26	-0.526	0.346	0.329	0.208	0.599
cg00075103	3	177778086	R			3	0.116	0.422	-0.334	0.0526	0.908	0.673	0.739	0.958
cg00075123	3	72869650	R		chr3:72788072-72788416	3	3.62	2.93	1.48	1.77	0.000298	0.00339	0.138	0.0775
cg00075467	2	9900545	F	NM_005680	chr2:9983263-9983901	2	-0.899	0.191	0.0108	-1.72	0.369	0.848	0.991	0.0854
cg00075507	17	23732353	R	NM_015077	chr17:26708225-26708805	17	0.0297	-0.099	-0.861	0.909	0.976	0.921	0.389	0.363
cg00075589	2	219232759	R	NM_001105537;NM_004328;NM_001079866	chr2:219523901-219524577	2	-3.56	-3.16	-1.02	-1.85	0.000369	0.00159	0.307	0.0646
cg00075608	5	64806309	R	NM_197941		5	2.22	2.06	1.7	0.12	0.0265	0.0395	0.0891	0.904
cg00075620	2	136896976	F		chr2:137181061-137181301	2	2.97	1.63	1.07	2.39	0.00297	0.104	0.287	0.0169
cg00075698	6	15628916	F	NM_004973	chr6:15517282-15517557	6	1.98	1.23	-0.656	2.64	0.0479	0.217	0.512	0.00837
cg00075844	3	51616852	R	NM_015106		3	1.09	-0.271	1.37	0.909	0.277	0.787	0.172	0.363
cg00075920	5	176958796	R	NM_007255	chr5:177026715-177027519	5	0.357	0.139	0.915	-0.346	0.721	0.89	0.36	0.73
cg00075956	10	1716078	F	NM_018702		10	-2.01	-0.561	-0.85	-2.06	0.0445	0.575	0.395	0.0396
cg00075967	15	72282407	F	NM_001142617;NM_001142618;NM_001142618;NM_001142619;NM_022369;NM_001142620		15	2.11	1.92	0.925	0.766	0.0346	0.0548	0.355	0.444
cg00075975	1	228558264	F	NM_024554	chr1:230492716-230492945	1	0.464	-0.271	-0.366	1.38	0.642	0.787	0.715	0.167
cg00076195	5	140872861	R		chr5:140892913-140893189	5	-5.27	-2.93	-3.32	-2.92	1.39e-07	0.00337	0.000886	0.00348
cg00076216	13	96946693	R			13	2.79	1.6	2.09	1.21	0.00528	0.109	0.0369	0.227
cg00076325	2	172682876	F		chr2:172972804-172973242	2	-1.26	-0.567	-0.312	-1.25	0.209	0.57	0.755	0.21
cg00076487	2	132753405	R			2	-3.62	-1.79	-1.85	-2.63	0.000292	0.0737	0.0642	0.00856
cg00076555	3	49680439	R	NM_003458		3	0.781	0.719	-0.527	1.04	0.435	0.472	0.598	0.3
cg00076645	5	171644167	R	NM_152277	chr5:171711372-171711583	5	-2.66	-2.23	-1.36	-0.984	0.00788	0.0257	0.175	0.325
cg00076653	4	14950976	R	NM_001135170		4	0.31	1.23	-0.409	-0.383	0.756	0.22	0.683	0.702
cg00076774	2	44870475	R			2	2.01	1.47	0.979	1.01	0.044	0.141	0.328	0.311
cg00076797	1	110824437	R	NR_003599		1	3.5	1.74	1.3	2.96	0.000459	0.0815	0.193	0.00308
cg00076936	20	34937397	F	NM_080628		20	1.59	1.34	0.516	0.841	0.112	0.18	0.606	0.4
cg00077285	15	35215083	F			15	1.36	1.02	0.334	0.954	0.173	0.31	0.739	0.34
cg00077297	15	77292676	F			15	1.17	1.15	1.29	-0.353	0.243	0.251	0.197	0.724
cg00077299	22	17012618	F	NM_017414	chr22:18632736-18632998	22	2.93	2.53	1.03	1.42	0.00335	0.0113	0.302	0.156
cg00077426	5	516550	F	NM_007277	chr5:464887-465666	5	0.231	-0.0792	-0.43	0.849	0.817	0.937	0.667	0.396
cg00077450	2	239026687	F		chr2:239361710-239361957	2	4.26	2.95	1.75	2.58	2.08e-05	0.00318	0.0795	0.00976
cg00077457	1	90232588	R	NM_182975;NR_002830;NM_182976	chr1:90460399-90461237	1	3.92	1.89	2.31	2.63	8.69e-05	0.0591	0.0207	0.00856
cg00077477	5	159238070	F			5	1.3	0.211	0.0968	1.89	0.194	0.833	0.923	0.0594
cg00077547	10	62840378	R	NM_178505		10	0.282	-0.589	0.398	0.729	0.778	0.556	0.691	0.466
cg00077566	6	146093627	F	NM_001018041;NM_005670	chr6:146055896-146056981	6	1.84	2.03	1.68	-0.458	0.0652	0.0428	0.0933	0.647
cg00077567	5	909030	R			5	-4.27	-2.42	-1.74	-3.16	1.95e-05	0.0154	0.0813	0.00156
cg00077738	4	1771664	R	NM_001163213;NM_000142;NM_022965	chr4:1803076-1805672	4	4.93	3.81	0.904	3.58	8.23e-07	0.000137	0.366	0.000349
cg00077838	22	45399397	R		chr22:47022457-47022659	22	1.33	0.726	0.14	1.37	0.184	0.468	0.889	0.172
cg00077877	8	131483656	R	NM_018482		8	0.9	2.15	0.57	-1.2	0.368	0.0315	0.569	0.229
cg00077904	5	151059102	R			5	-1.09	-0.64	-0.247	-0.962	0.275	0.522	0.805	0.336
cg00078025	9	116199796	R		chr9:117160139-117161064	9	-2.64	-1.59	-1.07	-1.88	0.00817	0.112	0.287	0.0604
cg00078085	3	8785592	F	NM_000916	chr3:8808961-8811280	3	-1.26	0.125	-1.58	-0.856	0.208	0.9	0.114	0.392
cg00078221	5	139907938	R	NM_003732;NM_020690	chr5:139927157-139927491	5	0.183	0.581	-0.043	-0.255	0.855	0.561	0.966	0.799
cg00078259	6	2601231	F			6	-0.618	-0.178	-1.29	0.278	0.536	0.859	0.197	0.781
cg00078299	8	124353560	R	NM_007222;NM_001017926	chr8:124286209-124287666	8	-2.41	-1.43	-0.936	-1.77	0.0158	0.152	0.349	0.0775
cg00078334	16	54071462	F	NM_004530	chr16:55513220-55513526	16	0.408	0.475	0.43	-0.18	0.683	0.635	0.667	0.857
cg00078348	11	113350697	F	NM_213621;NM_000869		11	1.56	1.64	0.828	0.203	0.119	0.1	0.407	0.839
cg00078456	1	1554285	R	NM_001170687;NM_001170688;NM_080875;NM_001170689;NM_001170686;NR_033183	chr1:1564421-1570006	1	1.57	2.06	1.12	-0.466	0.117	0.0395	0.263	0.641
cg00078513	15	23039207	F	NR_003355		15	-1.57	-0.897	-1.66	-0.255	0.117	0.37	0.0975	0.798
cg00078759	16	1540970	R	NM_014714;NM_024600	chr16:1598952-1599157	16	-0.305	-0.594	-0.0753	0.165	0.761	0.553	0.94	0.869
cg00078857	8	49589085	F		chr8:49427074-49427416	8	0.598	1.51	-1.51	0.774	0.55	0.131	0.132	0.439
cg00078861	5	154409755	R			5	-0.451	0.594	-0.441	-0.984	0.652	0.553	0.659	0.325
cg00078867	X	48427342	R	NM_000377		23	-0.0123	-0.897	1.26	-0.203	0.99	0.37	0.208	0.839
cg00078996	12	130859282	F		chr12:132293443-132293816	12	1.12	0.99	0.871	0.105	0.261	0.322	0.383	0.916
cg00079023	5	139472719	F	NM_005859	chr5:139492723-139492966	5	-0.365	-0.323	-1.01	0.608	0.715	0.746	0.312	0.543
cg00079216	12	6586818	F	NM_001273	chr12:6716080-6716790	12	-1.37	0.218	-1.17	-1.5	0.17	0.828	0.241	0.133
cg00079219	12	52646398	F	NR_003716	chr12:54360374-54360660	12	-2.58	-1.41	-2.35	-0.826	0.01	0.16	0.019	0.409
cg00079224	16	29907211	F	NM_016151;NM_004783	chr16:29997636-29997849	16	3.21	2.1	1.78	1.68	0.00135	0.0359	0.0759	0.0939
cg00079302	19	1390985	F	NM_001018	chr19:1439951-1440423	19	-1.59	-1.1	-0.99	-0.676	0.112	0.273	0.322	0.499
cg00079375	15	76912890	F		chr15:79122967-79124550	15	1.96	1.71	0.57	1.04	0.0501	0.0874	0.569	0.3
cg00079388	2	187063564	F	NM_018471	chr2:187350497-187351609	2	-0.467	-0.37	0.42	-0.774	0.641	0.712	0.675	0.439
cg00079477	12	56066471	F			12	-0.543	-0.066	-0.936	-0.0225	0.587	0.947	0.349	0.982
cg00079551	2	39854726	R	NR_028102;NM_025264		2	3.31	2.24	0.694	2.65	0.000934	0.0253	0.488	0.00801
cg00079598	11	123182113	F	NM_001005325		11	0.225	1.07	0.237	-0.931	0.822	0.285	0.813	0.352
cg00079764	6	27909531	R		chr6:27798990-27799427	6	2.4	1.68	1.11	1.34	0.0163	0.0921	0.268	0.181
cg00079898	11	5757820	R	NM_001001922		11	1.52	0.944	2.27	-0.413	0.129	0.345	0.0232	0.679
cg00080068	2	242577875	R		chr2:242929993-242930252	2	4.23	3.19	0.753	3.17	2.33e-05	0.0014	0.451	0.00152
cg00080081	17	30725889	F	NM_001104587;NM_152270;NM_001104588;NM_001104590;NM_001104589	chr17:33700487-33700760	17	3.22	2.83	1.76	0.962	0.00126	0.00464	0.0776	0.336
cg00080125	17	56845395	F	NM_203425;NM_203425	chr17:59488115-59490485	17	0.0517	0.304	1.08	-1.17	0.959	0.761	0.282	0.241
cg00080148	22	42536516	R	NM_198856;NM_022785	chr22:44207947-44208435	22	2.62	1.9	2.66	0.113	0.00888	0.0574	0.00771	0.91
cg00080188	10	21598207	R			10	1.71	1.28	0.484	1.13	0.0873	0.201	0.628	0.257
cg00080252	8	118017945	R		chr8:117950472-117950717	8	2.77	1.79	2.17	0.916	0.00554	0.0737	0.0298	0.359
cg00080333	4	184729764	R			4	-1.04	-0.686	-0.29	-0.796	0.296	0.493	0.771	0.426
cg00080682	22	49523409	R	NM_001097		22	2.21	1.84	1.61	0.413	0.0268	0.0656	0.107	0.679
cg00080972	5	178918897	F	NM_001040452;NM_025158;NM_001040451	chr5:178986513-178986999	5	-2.89	-1.78	-1.89	-1.36	0.00389	0.0748	0.0583	0.174
cg00080987	3	128420052	R			3	1.69	0.884	0.441	1.55	0.0909	0.377	0.659	0.122
cg00081046	2	170385743	F	NM_014168	chr2:170681219-170681587	2	3.96	3	2.94	0.999	7.47e-05	0.00274	0.00331	0.318
cg00081084	19	41304562	R	NM_001281	chr19:36612342-36612932	19	-0.111	0.389	-0.344	-0.285	0.912	0.697	0.731	0.775
cg00081087	7	34840437	R	NR_015356;NM_207173;NM_207172		7	0.112	0.68	1.66	-1.97	0.911	0.497	0.0975	0.0491
cg00081105	3	162874459	F			3	3.58	2.73	1.87	1.57	0.000346	0.00643	0.0612	0.116
cg00081324	17	45556232	F	NM_174920		17	-1.45	-0.251	-0.452	-1.79	0.147	0.802	0.651	0.0738
cg00081404	2	106324154	F		chr2:106959115-106959526	2	2.56	1.17	1.55	1.74	0.0105	0.243	0.121	0.0814
cg00081417	6	140441830	R			6	0.739	1.58	0.387	-0.729	0.46	0.113	0.699	0.466
cg00081439	10	733761	F		chr10:743240-743479	10	2.37	1.56	1.76	0.834	0.0178	0.119	0.0776	0.404
cg00081465	18	75484597	F		chr18:77386827-77387050	18	3.48	2.74	1.88	1.37	0.00051	0.00617	0.0597	0.169
cg00081602	5	72958713	R	NM_001080479	chr5:72921593-72922527	5	3.27	2.86	2.08	0.744	0.00106	0.00427	0.0378	0.457
cg00081666	6	83834064	R	NM_015018	chr6:83777271-83777690	6	-2.88	-2.42	-1.31	-1.21	0.00395	0.0157	0.189	0.227
cg00081714	5	116334079	R			5	-1.1	-0.224	-1.86	0.0225	0.273	0.822	0.0627	0.982
cg00081729	1	238723360	F	NM_022469	chr1:240656253-240656720	1	-0.103	0.719	0.192	-1.08	0.918	0.472	0.848	0.279
cg00081799	1	6313380	F	NM_181864;NM_181865;NM_007274;NM_181866		1	1.73	0.812	0.344	1.77	0.0837	0.417	0.731	0.0763
cg00081827	2	24249728	F		chr2:24397645-24398194	2	4.19	3.11	3.17	1.06	2.76e-05	0.00184	0.0015	0.29
cg00081919	2	43040975	F			2	-0.483	-0.37	1.31	-1.59	0.629	0.712	0.189	0.111
cg00082140	5	179749372	F		chr5:179816662-179817005	5	-0.539	0.462	0.452	-1.78	0.59	0.644	0.651	0.075
cg00082182	1	93687453	R	NM_017737;NM_001164473;NM_001024948	chr1:93913636-93914524	1	-2.21	-0.983	-1	-1.83	0.0272	0.326	0.317	0.0679
cg00082219	2	219554543	R	NM_017521	chr2:219846291-219847137	2	-2.34	-2.26	-0.958	-0.759	0.0195	0.0236	0.338	0.448
cg00082285	1	1087133	R		chr1:1098043-1100584	1	-2.11	-1.23	-2.21	-0.338	0.0351	0.217	0.0274	0.735
cg00082310	3	173011267	F	NM_001130081;NM_002662	chr3:171527617-171528458	3	-2.63	-1.5	-1.19	-1.83	0.00857	0.132	0.235	0.0671
cg00082384	3	52491356	F	NM_007184		3	-0.91	-0.112	-1.6	-0.00751	0.363	0.911	0.109	0.994
cg00082491	6	31741007	F	NM_033177;NM_033177;NM_001320	chr6:31632815-31634093	6	-2.39	-2.32	-0.676	-1.03	0.017	0.0203	0.499	0.303
cg00082540	21	45221202	R	NM_058190		21	-2.35	-1.71	-0.549	-1.71	0.0188	0.0874	0.583	0.0868
cg00082656	7	104730751	F	NM_182692	chr7:104941752-104941978	7	3.14	1.58	0.964	2.79	0.00171	0.113	0.335	0.0052
cg00082664	4	154930246	F	NM_003013	chr4:154709512-154710827	4	-2.35	-1.06	-1.4	-1.65	0.0186	0.291	0.162	0.0999
cg00082729	4	54325416	R			4	-2.66	-2.1	-0.473	-1.89	0.00792	0.0353	0.636	0.0594
cg00082770	2	200040984	R	NR_026830	chr2:200333687-200334172	2	1.31	1.41	0.904	-0.0451	0.19	0.158	0.366	0.964
cg00082787	22	27754662	R	NM_032173	chr22:29426510-29426843	22	2.01	2.15	0.43	0.789	0.0445	0.0315	0.667	0.43
cg00082874	20	44094327	R	NM_020708;NM_001134771	chr20:44660342-44660948	20	-0.0395	-0.383	1.02	-0.571	0.968	0.702	0.307	0.568
cg00082897	22	49314258	R	NM_001113756;NM_001953;NM_001113755	chr22:50963608-50970768	22	2.02	1.41	0.947	1.12	0.043	0.158	0.344	0.263
cg00082912	17	49549267	R			17	-0.0198	0.317	-0.161	-0.218	0.984	0.751	0.872	0.828
cg00082939	10	76835299	F	NR_024421;NR_024422	chr10:77155128-77169600	10	-0.0727	0.033	-0.656	0.421	0.942	0.974	0.512	0.674
cg00082954	6	136920012	R	NM_005923		6	3.3	2.03	2.69	1.09	0.000983	0.0421	0.00715	0.276
cg00082981	6	30019318	F	NM_002116	chr6:29910202-29911367	6	2.67	2.43	1.02	1.09	0.00752	0.0149	0.306	0.276
cg00083018	6	101947050	R		chr6:101841425-101841905	6	-0.217	-0.0198	0.247	-0.563	0.828	0.984	0.805	0.573
cg00083042	10	30444623	R			10	1.93	1.61	0.172	1.43	0.0539	0.107	0.863	0.151
cg00083046	2	174913090	R		chr2:175204843-175207553	2	-0.419	-0.238	-0.0538	-0.413	0.675	0.812	0.957	0.679
cg00083072	11	65171766	F	NM_153253;NM_006747	chr11:65413778-65415203	11	0.101	-0.185	-0.958	1.2	0.92	0.853	0.338	0.229
cg00083188	10	78984850	F	NM_001161353;NM_001161352;NM_002247;NM_001014797		10	3.29	2.22	1.98	1.51	0.00101	0.0266	0.0477	0.131
cg00083193	15	63124478	F	NM_178859		15	-2.47	-0.686	-0.915	-2.64	0.0136	0.493	0.36	0.00819
cg00083206	6	110827998	R	NM_004032;NM_003649	chr6:110721059-110721630	6	-1.89	-1.35	-0.667	-1.21	0.0587	0.178	0.505	0.227
cg00083262	1	155392150	R			1	1.24	0.68	1.36	0.195	0.215	0.497	0.175	0.845
cg00083359	8	144747253	R	NM_001130053;NM_032378;NM_001130055;NM_001960;NM_001130056;NM_001130057;NM_001130054	chr8:144675988-144676207	8	-0.105	0.145	-0.678	0.27	0.917	0.885	0.498	0.787
cg00083596	7	3963382	R	NM_152744		7	1.89	2.06	0.936	0.233	0.0591	0.0395	0.349	0.816
cg00083616	19	40673211	F	NM_207392		19	1.54	1.24	0.172	1.16	0.124	0.215	0.863	0.247
cg00083659	22	35734523	F	NM_178552;NM_001163857		22	1.65	0.666	2.1	0.248	0.0988	0.505	0.0359	0.804
cg00083790	12	131454083	F			12	-1.17	-0.825	0.57	-1.62	0.244	0.409	0.569	0.106
cg00083801	17	4395280	F	NM_014520;NM_001105538		17	4.24	2.38	1.26	3.58	2.2e-05	0.0172	0.208	0.000339
cg00083833	16	49140774	F	NM_033119	chr16:50583175-50583465	16	0.479	0.475	0.506	-0.128	0.632	0.635	0.613	0.898
cg00083937	22	49386671	R	NM_012324	chr22:51038494-51039752	22	-1.64	-1.18	-1.41	-0.3	0.102	0.238	0.159	0.764
cg00083959	15	49030881	R	NM_007347		15	4.8	2.69	3.26	2.46	1.55e-06	0.00724	0.00111	0.014
cg00083993	5	146113871	F	NM_181674;NM_001127381;NM_181677;NM_181676;NM_181675;NM_004576;NM_181678		5	3.37	2.82	1.15	1.77	0.000741	0.00484	0.25	0.0775
cg00084019	7	271822	F		chr7:178517-179127	7	0.844	0.911	0.0108	0.473	0.399	0.363	0.991	0.636
cg00084094	12	107620333	R	NM_014325		12	-0.531	0.0132	-1.48	0.398	0.596	0.989	0.138	0.691
cg00084131	3	69108178	R	NM_173654		3	3.27	2.83	1.6	1.18	0.00108	0.00464	0.109	0.238
cg00084202	8	143358197	F	NM_145003	chr8:143361313-143361642	8	-3.21	-1.65	-1.32	-2.54	0.00133	0.099	0.186	0.0111
cg00084271	1	158388111	R	NM_144699;NM_144699		1	2.32	1.99	1.21	0.804	0.0202	0.047	0.228	0.422
cg00084338	6	170437845	F	NM_005618	chr6:170597246-170597499	6	-2.29	-1.23	-1.38	-1.37	0.0223	0.218	0.168	0.172
cg00084347	12	122959866	F	NM_207437		12	-1.71	-1.06	-1.14	-0.781	0.0873	0.288	0.254	0.435
cg00084398	6	43357961	R	NM_032538	chr6:43251671-43252018	6	1.16	0.554	0.312	1.11	0.245	0.579	0.755	0.266
cg00084432	13	35842471	F	NM_001142294		13	-0.547	-0.587	-0.172	-0.165	0.584	0.557	0.863	0.869
cg00084577	16	30628640	R	NR_002966;NM_006662		16	3.35	3.31	2	0.453	0.00082	0.000925	0.0454	0.651
cg00084604	6	41037474	F			6	3.23	1.39	2.19	2.07	0.00125	0.166	0.0282	0.0381
cg00084643	5	125964015	F	NM_032177	chr5:125936522-125937100	5	0.291	1.42	0.398	-1.32	0.771	0.156	0.691	0.186
cg00084720	8	94597031	R			8	3.48	2.34	2.21	1.51	0.000505	0.0195	0.0274	0.131
cg00084770	10	88139190	R		chr10:88149266-88149738	10	0.324	0.937	-0.29	-0.165	0.746	0.349	0.771	0.869
cg00085013	3	14846574	F	NM_152536		3	-0.14	0.33	-0.398	-0.225	0.889	0.741	0.691	0.822
cg00085061	21	42034693	R	NM_020639	chr21:43160916-43161948	21	-0.418	-0.554	-0.732	0.511	0.676	0.579	0.464	0.609
cg00085122	1	11631605	F	NM_012168	chr1:11708767-11709277	1	-0.719	-0.0924	-0.269	-0.879	0.472	0.926	0.788	0.379
cg00085123	2	8641357	F		chr2:8723855-8724093	2	4.11	2.78	1.48	2.76	3.91e-05	0.00547	0.138	0.00584
cg00085199	8	141175778	F	NM_001160372;NM_031466	chr8:141107837-141110984	8	2.22	1.66	0.398	1.68	0.0264	0.0977	0.691	0.0924
cg00085256	2	217959691	R	NR_026597		2	1.98	1.21	1.59	0.681	0.0476	0.225	0.111	0.496
cg00085281	7	2021625	R	NM_003550;NM_001013837;NM_001013836	chr7:2054060-2054386	7	-0.508	0.165	0.269	-1.26	0.611	0.869	0.788	0.207
cg00085370	5	1908960	F		chr5:1856773-1858444	5	-3.95	-2.3	-1.32	-3.12	7.75e-05	0.0213	0.186	0.00182
cg00085416	8	74822819	R	NM_001164381;NM_001164380;NM_001164385;NM_001164382;NM_001164384;NM_014393;NM_001164383	chr8:74658490-74659828	8	1.66	1.84	0.247	0.676	0.0974	0.0656	0.805	0.499
cg00085430	17	2978624	R	NM_003555		17	-1.56	-0.231	0.172	-2.55	0.118	0.817	0.863	0.0109
cg00085434	11	14884065	R		chr11:14926471-14927770	11	0.813	0.211	0.258	0.924	0.416	0.833	0.796	0.356
cg00085438	3	153532670	F	NM_207295;NM_207293;NM_021038;NM_207292;NM_207296;NM_207297;NM_207294		3	1.31	1.23	1.25	-0.158	0.19	0.22	0.212	0.875
cg00085448	12	111900825	F	NM_001032731;NM_002535;NM_016817		12	-1.26	-0.614	1.01	-2.37	0.207	0.539	0.311	0.0176
cg00085486	7	84650475	R		chr7:84814839-84816242	7	3.95	2.97	2.47	1.41	7.87e-05	0.00298	0.0133	0.158
cg00085493	1	206106826	R		chr1:208041862-208042718	1	1.28	0.825	-0.527	1.77	0.201	0.409	0.598	0.0775
cg00085619	7	154945509	F	NM_001427	chr7:155246390-155251955	7	1.77	1.58	0.603	0.826	0.0762	0.113	0.547	0.409
cg00085732	17	23824947	F	NM_001145976;NR_027384;NM_001145975;NM_003984		17	-0.502	-0.732	0.247	-0.308	0.616	0.464	0.805	0.758
cg00085790	1	209788723	F			1	3.13	1.36	2.4	1.76	0.00175	0.174	0.0164	0.0788
cg00085889	3	12896526	R		chr3:12917391-12918016	3	-0.596	-0.416	-0.0215	-0.556	0.551	0.678	0.983	0.578
cg00086113	15	73547876	F	NM_002833		15	0.815	1.35	0.506	-0.466	0.415	0.176	0.613	0.641
cg00086171	12	54556034	F			12	4.81	3.46	2.68	2.18	1.52e-06	0.000545	0.00738	0.0294
cg00086243	1	1132268	F	NM_148902;NM_148901;NM_004195	chr1:1141670-1142150	1	-1.87	0.106	-1.15	-2.25	0.0614	0.916	0.25	0.0247
cg00086283	7	158102008	R			7	0.507	0.93	0.742	-0.759	0.613	0.352	0.458	0.448
cg00086297	16	3602234	R	NM_032444	chr16:3661120-3661775	16	-2.17	-1.89	-0.42	-1.33	0.0304	0.0585	0.675	0.184
cg00086346	19	3859136	R	NM_033064	chr19:3907689-3908398	19	0.126	1.52	0.796	-2.06	0.9	0.127	0.426	0.0396
cg00086426	16	10841874	R			16	3.27	2.76	0.981	1.79	0.00108	0.0057	0.327	0.0738
cg00086429	2	206274270	R	NM_201279;NM_018534;NM_201264;NM_201267;NM_003872;NM_201266		2	2.21	1.81	0.721	1.22	0.0271	0.0706	0.471	0.221
cg00086488	13	112696883	R	NM_001112732;NM_024979	chr13:113648343-113649601	13	3.15	2.47	1.38	1.55	0.00162	0.0133	0.168	0.122
cg00086493	19	56227160	F	NM_145895;NM_019598;NM_145894	chr19:51535218-51535475	19	-0.933	-1.15	1.05	-1.31	0.351	0.251	0.292	0.189
cg00086577	6	32230872	F	NM_005155;NM_138717	chr6:32121829-32122529	6	0.361	0.343	-0.549	0.736	0.718	0.732	0.583	0.462
cg00086670	10	104619112	R	NM_020682	chr10:104629038-104629479	10	-2.07	-0.409	-0.678	-2.46	0.0387	0.682	0.498	0.0137
cg00086710	4	89423098	F	NM_152542	chr4:89204952-89206069	4	-0.969	0.587	-0.947	-1.4	0.332	0.557	0.344	0.16
cg00086871	4	7039545	F	NM_001113361;NM_001113363;NM_020773	chr4:6988305-6989373	4	-4.29	-1.97	-2.31	-3.17	1.75e-05	0.0493	0.0207	0.00152
cg00087005	10	126838208	F	NM_001083914;NM_001329	chr10:126847224-126851327	10	-2.27	-1.28	-1.08	-1.55	0.0233	0.201	0.282	0.12
cg00087023	16	2752826	F	NM_016333	chr16:2812266-2812574	16	4.49	3.36	2.05	2.29	7.14e-06	0.000783	0.0399	0.022
cg00087073	2	71079180	R		chr2:71221520-71222299	2	3.02	1.87	1.64	1.71	0.00254	0.0609	0.102	0.0868
cg00087153	2	48609583	R		chr2:48757211-48757785	2	-0.505	-0.238	0.85	-1.35	0.614	0.812	0.395	0.176
cg00087182	22	22632043	F	NM_001080843;NM_000854	chr22:24303118-24303844	22	1.76	1.43	0.689	0.886	0.078	0.152	0.491	0.375
cg00087244	7	73680423	R			7	-1.45	-0.765	-1.25	-0.563	0.146	0.444	0.212	0.573
cg00087274	3	126339450	R	NM_024628	chr3:124860569-124861019	3	1.45	0.719	0.871	0.931	0.147	0.472	0.383	0.352
cg00087316	4	181215703	F		chr4:180979038-180980619	4	0.797	0.713	0.624	0.0601	0.425	0.476	0.533	0.952
cg00087368	6	101003113	R	NM_005068	chr6:100897080-100897621	6	1.09	1.52	0.441	-0.12	0.275	0.127	0.659	0.904
cg00087417	6	35995656	F	NM_003137	chr6:35888479-35889060	6	0.879	0.963	0.452	0.0901	0.379	0.335	0.651	0.928
cg00087425	7	22733354	R	NM_000600;NM_000600		7	-3.17	-2.26	0.0274	-3.02	0.00154	0.024	0.978	0.00253
cg00087482	7	99638057	R	NR_028040;NM_012447;NM_178831;NR_028039		7	3.33	2.59	1.62	1.51	0.000862	0.00951	0.104	0.131
cg00087546	1	3298146	F	NM_022114;NM_199454	chr1:3310102-3311035	1	1.17	0.323	1.82	0.0376	0.242	0.746	0.069	0.97
cg00087601	21	34668964	R	NM_058182	chr21:35747326-35748122	21	4.19	3.56	2.39	1.28	2.83e-05	0.000376	0.0169	0.199
cg00087645	6	157081971	F		chr6:157040983-157041385	6	2.35	1.29	1.67	1.16	0.0188	0.196	0.0948	0.247
cg00087746	12	62366411	F			12	-1.8	-1.33	-0.99	-0.796	0.0716	0.185	0.322	0.426
cg00087792	16	3940987	F			16	3.68	3.08	1.15	2.01	0.000231	0.00204	0.25	0.0441
cg00087884	1	6448138	R	NM_148967;NM_003790;NM_148970;NM_001039664;NM_148966;NM_148965	chr1:6525996-6526228	1	0.175	0.614	1.08	-1.28	0.861	0.539	0.282	0.199
cg00087898	6	33361621	R	NM_005452;NM_001164267	chr6:33256539-33256973	6	3.15	2.78	1.48	1.13	0.00164	0.00547	0.138	0.257
cg00087963	16	49726938	R		chr16:51168266-51169110	16	2.58	1.3	1.27	1.89	0.00993	0.194	0.204	0.0594
cg00087971	6	52333055	F		chr6:52226753-52228006	6	1.8	1.45	1.25	0.443	0.072	0.148	0.212	0.658
cg00088007	8	41623723	F	NM_152568	chr8:41503916-41504266	8	0.933	-0.904	0.0861	2.43	0.351	0.366	0.931	0.0153
cg00088042	10	103882299	F	NM_015062	chr10:103892659-103893590	10	0.674	0.66	-1.05	1.38	0.5	0.509	0.292	0.167
cg00088079	6	16730613	F	NM_001128164;NM_000332		6	2.85	2.26	0.592	1.95	0.00432	0.0236	0.554	0.0508
cg00088148	2	27197909	F		chr2:27346380-27346766	2	2.48	2.1	1.46	0.729	0.0131	0.0359	0.143	0.466
cg00088183	1	90957756	R		chr1:91185156-91185577	1	0.284	0.739	-0.947	0.548	0.777	0.46	0.344	0.583
cg00088251	1	1439617	R	NM_001170536;NM_018188;NM_001170535	chr1:1446878-1448205	1	-0.621	-0.561	0.28	-0.714	0.535	0.575	0.78	0.475
cg00088428	6	112775215	R	NM_001013734		6	5.26	3.62	3.26	2.26	1.42e-07	0.000292	0.00111	0.0238
cg00088464	3	130263583	F	NM_000174		3	0.729	0.475	0.387	0.398	0.466	0.635	0.699	0.691
cg00088504	10	120755388	R			10	1.15	0.871	0.43	0.659	0.25	0.384	0.667	0.51
cg00088688	6	167480494	F			6	-1.25	-0.468	-0.334	-1.32	0.213	0.639	0.739	0.186
cg00088797	3	12951288	F	NM_001134382;NM_014869	chr3:12976966-12978182	3	-0.0256	0.673	-1.3	0.398	0.98	0.501	0.194	0.691
cg00088844	12	50603616	R			12	0.599	0.0132	0.43	0.616	0.549	0.989	0.667	0.538
cg00088880	7	115637029	F	NM_015641	chr7:115850370-115851028	7	3.68	2.56	1.96	1.84	0.000231	0.0105	0.0502	0.0657
cg00088885	4	89115658	R	NM_000582;NM_001040058;NM_001040060		4	1.44	1.73	-0.172	0.796	0.15	0.0838	0.863	0.426
cg00088916	16	76569195	F	NM_020927		16	1.62	1.55	1.29	0	0.105	0.121	0.197	1
cg00088972	2	113984571	F			2	-2.07	-1.19	-1.14	-1.25	0.0387	0.235	0.254	0.21
cg00088989	2	96331739	F	NM_014014	chr2:96971125-96971556	2	2.86	1.22	1.23	2.48	0.00424	0.222	0.22	0.0132
cg00089100	22	25252951	F	NM_003595;NM_001008566		22	2.69	2.07	0.151	2.28	0.00705	0.0389	0.88	0.0228
cg00089154	16	55910233	R			16	2.4	1.64	0.635	1.79	0.0164	0.1	0.526	0.0738
cg00089162	15	87483172	R	NM_152924;NM_007011		15	3.71	3.17	1.39	1.75	0.00021	0.0015	0.165	0.0801
cg00089214	12	131082021	F	NM_015409	chr12:132514283-132514525	12	-2.02	-0.627	-1.42	-1.51	0.0432	0.531	0.156	0.131
cg00089314	5	135197183	R	NM_145282	chr5:135170271-135171156	5	0.549	0.152	1.58	-0.623	0.583	0.879	0.114	0.533
cg00089353	3	161956387	F	NM_139245	chr3:160472310-160474487	3	-2.11	-0.845	-1.93	-0.992	0.0347	0.398	0.0541	0.321
cg00089372	1	154736588	F	NM_005920	chr1:156469617-156471060	1	-4.05	-2.78	-1.65	-2.5	5.13e-05	0.00536	0.0997	0.0124
cg00089384	15	49759991	R	NM_013243;NM_001165257	chr15:51973533-51973838	15	0.224	-0.0726	0.215	0.263	0.823	0.942	0.83	0.793
cg00089430	5	280764	R	NM_004168		5	-0.0237	-0.264	-0.129	0.346	0.981	0.792	0.897	0.73
cg00089451	2	233176701	R		chr2:233470646-233471077	2	2.5	0.983	0.43	2.82	0.0123	0.326	0.667	0.00474
cg00089453	5	149983230	R	NM_001166208;NM_001166209	chr5:150004670-150004984	5	1.55	1.49	-0.0215	1.1	0.12	0.136	0.983	0.273
cg00089512	1	2278027	F	NM_024848		1	-2.2	-0.33	-2.04	-1.57	0.0277	0.741	0.0409	0.116
cg00089528	5	180541884	F		chr5:180610053-180610263	5	-2.02	-1.23	-0.764	-1.46	0.0434	0.217	0.445	0.145
cg00089550	11	57023757	R	NM_003627	chr11:57267006-57267316	11	-0.121	0.244	-1.36	0.736	0.903	0.807	0.175	0.462
cg00089814	3	72723698	R			3	-3.06	-0.726	-0.689	-3.8	0.0022	0.468	0.491	0.000144
cg00089821	6	170649021	R			6	-1.78	-0.812	-0.409	-1.8	0.0757	0.417	0.683	0.0726
cg00089823	5	1985098	R		chr5:1930754-1931986	5	1.55	1.17	1.09	0.451	0.12	0.24	0.277	0.652
cg00089945	1	220883481	R	NM_198551	chr1:222817467-222817671	1	1.99	0.97	1.24	1.26	0.0467	0.332	0.216	0.207
cg00089966	5	159273008	R		chr5:159343215-159343574	5	0.0683	-0.567	0.172	0.548	0.946	0.57	0.863	0.583
cg00090135	5	7901160	F	NM_001089584	chr5:7849945-7850439	5	5.22	3.37	2.67	2.97	1.79e-07	0.000765	0.00762	0.00293
cg00090197	1	43511319	F	NM_144626	chr1:43738484-43738829	1	1.92	1.41	0	1.78	0.0552	0.16	1	0.075
cg00090261	8	101187724	F	NM_015668	chr8:101117922-101118693	8	-3.78	-2.38	-2.56	-1.66	0.000159	0.0175	0.0104	0.0969
cg00090265	12	131650378	R	NM_001142641	chr12:133140304-133140634	12	3.08	1.15	1.1	3.03	0.00208	0.251	0.272	0.00241
cg00090282	3	21736221	R	NM_024697		3	-0.71	-0.812	-0.28	-0.113	0.478	0.417	0.78	0.91
cg00090309	7	156525128	R		chr7:156832678-156832961	7	-1.33	-0.64	-0.43	-1.21	0.182	0.522	0.667	0.227
cg00090338	19	37527666	F	NM_001136156;NM_014910	chr19:32836353-32836840	19	3.09	2.63	1.48	1.19	0.00202	0.00847	0.14	0.235
cg00090431	2	241501774	R		chr2:241855374-241855631	2	1.18	-0.205	0.796	1.49	0.239	0.838	0.426	0.135
cg00090452	12	109737796	R			12	3.01	2.62	1.59	0.962	0.00265	0.0088	0.111	0.336
cg00090521	15	25633590	F			15	-2.79	-1.19	-0.108	-3.38	0.00526	0.235	0.914	0.000724
cg00090619	6	33268264	F	NM_001163771;NM_080680;NM_080679;NM_080681	chr6:33160945-33161337	6	0.667	-0.818	2.11	0.113	0.504	0.413	0.035	0.91
cg00090648	1	224253899	R	NM_152608	chr1:226186803-226187336	1	-2.28	-0.954	-1.96	-1.13	0.0225	0.34	0.0502	0.257
cg00090674	22	48788805	F	NM_001001694	chr22:50448567-50449521	22	1.52	2.41	0.043	0.0451	0.128	0.016	0.966	0.964
cg00090737	10	134850079	F	NM_152643	chr10:134999520-134999831	10	-4.08	-2.44	-0.398	-4	4.5e-05	0.0146	0.691	6.23e-05
cg00090782	10	42568876	F		chr10:43248523-43250912	10	5.03	3.23	2.13	3.27	4.85e-07	0.00122	0.0331	0.00108
cg00090787	15	64582399	R	NM_000968;NR_002440;NR_002442		15	1.27	-0.165	1.58	0.924	0.203	0.869	0.114	0.356
cg00090865	3	43638698	R	NM_018075	chr3:43663661-43663906	3	-2.37	-1.62	-0.839	-1.59	0.0176	0.105	0.401	0.113
cg00091060	19	62613894	R	NM_006959	chr19:57922440-57923066	19	-4.03	-2.42	-2.4	-2.19	5.49e-05	0.0157	0.0164	0.0283
cg00091063	3	38152535	F	NR_024024;NM_001130410;NM_001607	chr3:38178002-38178750	3	1.84	1.39	1.72	0.148	0.0655	0.164	0.0852	0.882
cg00091064	6	41484582	F		chr6:41376590-41377167	6	-1.39	-1.37	-1.36	0.27	0.165	0.17	0.175	0.787
cg00091146	8	1038379	R		chr8:1051641-1051896	8	4.09	2.44	1.82	2.76	4.4e-05	0.0146	0.069	0.0057
cg00091178	3	196937580	F	NM_001098516;NM_152673	chr3:195452004-195452645	3	4.61	2.78	1.4	3.67	4.07e-06	0.00547	0.162	0.000247
cg00091302	1	180869609	F			1	-1.43	-1.37	-0.624	-0.443	0.153	0.17	0.533	0.658
cg00091349	3	152531096	F	NM_053002;NM_176894		3	3.52	2.5	2.14	1.46	0.000438	0.0124	0.0323	0.145
cg00091552	1	43007454	F	NM_024097	chr1:43232214-43233359	1	1.45	1.39	1.08	0.0676	0.146	0.164	0.282	0.946
cg00091569	3	40403387	R	NM_001248	chr3:40428651-40429015	3	2.7	0.317	1.89	2.55	0.00694	0.751	0.0583	0.0106
cg00091633	3	121653073	R	NM_007085	chr3:120169202-120170519	3	0.181	-1.99	0.463	1.93	0.856	0.0463	0.644	0.0535
cg00091693	17	36295128	R	NM_019010		17	0.923	0.165	1.96	-0.338	0.356	0.869	0.0502	0.735
cg00091760	10	124121062	F		chr10:124134088-124134933	10	0.589	1.23	-0.796	0.421	0.556	0.217	0.426	0.674
cg00091794	9	100511970	R	NM_005458	chr9:101469579-101472154	9	1.4	0.673	0.355	1.35	0.161	0.501	0.723	0.176
cg00091953	4	143545991	F	NM_003866;NM_001101669		4	0.428	1.52	0.904	-1.64	0.668	0.129	0.366	0.102
cg00091960	7	126616750	R	NM_001127323;NR_028041;NM_000845		7	0.31	0.0132	0.237	0.3	0.756	0.989	0.813	0.764
cg00092235	17	67666515	F			17	2.87	2.1	2.52	0.444	0.00413	0.0356	0.0118	0.657
cg00092309	4	186171791	F		chr4:185937242-185937750	4	-0.337	-0.541	0.527	-0.473	0.736	0.588	0.598	0.636
cg00092443	20	46011777	R		chr20:46579791-46580167	20	1.86	1.01	0.775	1.41	0.0627	0.313	0.439	0.158
cg00092518	13	48968551	F	NM_001040443;NM_001040444;NM_001040444	chr13:50070022-50070719	13	1.44	-0.343	2.53	0.556	0.15	0.732	0.0115	0.578
cg00092551	7	127158801	R	NM_014390		7	3.12	1.98	0.183	3.06	0.00179	0.0478	0.855	0.00223
cg00092565	21	46339637	F		chr21:47517651-47518999	21	4.74	2.85	2.22	3.1	2.09e-06	0.00436	0.0267	0.00192
cg00092644	1	95132967	F	NM_001114106;NM_152369		1	3.46	3.22	1.07	1.58	0.000532	0.00128	0.287	0.115
cg00092711	21	46674745	R	NM_006031	chr21:47851448-47851683	21	0.0442	1.31	-1.22	-0.203	0.965	0.191	0.224	0.839
cg00092821	6	46155578	F	NM_001114086		6	2.39	2.1	1.44	0.593	0.0169	0.0359	0.149	0.553
cg00092992	1	33368687	F		chr1:33592891-33593155	1	-2.59	-1.82	-1.73	-0.962	0.00959	0.0686	0.0832	0.336
cg00093080	12	115905607	F	NM_153348;NM_012174		12	2.79	1.87	1.87	1.13	0.00521	0.0609	0.0612	0.26
cg00093095	17	73992975	F	NM_173628		17	-0.453	0.323	0.581	-1.61	0.65	0.746	0.561	0.108
cg00093099	18	2839071	F	NM_032048	chr18:2846565-2848175	18	-1.23	0.033	-0.0968	-2.02	0.219	0.974	0.923	0.0433
cg00093149	12	12228728	F	NM_002336		12	2.81	1.85	2.16	0.916	0.00498	0.0637	0.0306	0.359
cg00093177	17	34439021	F			17	2.29	1.76	0.377	1.71	0.0221	0.0792	0.706	0.0868
cg00093354	17	15576189	R	NM_178571		17	1.51	1.19	0.118	1.22	0.131	0.235	0.906	0.224
cg00093433	16	84538811	R		chr16:85981652-85981965	16	-0.104	1.36	-0.237	-1.37	0.917	0.174	0.813	0.172
cg00093436	1	35944866	R		chr1:36173406-36173979	1	3.59	3.02	2	1.17	0.000332	0.00251	0.0456	0.241
cg00093478	13	112044968	F		chr13:112997192-112997717	13	-1.93	-1.21	-0.603	-1.46	0.0539	0.225	0.547	0.143
cg00093522	1	2241879	R		chr1:2253723-2254758	1	1.14	1.29	-0.14	0.706	0.255	0.196	0.889	0.48
cg00093542	8	27200370	F	NM_171982	chr8:27145131-27145601	8	4.82	3.31	2.44	2.57	1.4e-06	0.000947	0.0146	0.0102
cg00093544	22	29231640	F	NM_174977;NM_001161368;NM_001161368;NM_174977	chr22:30901242-30901744	22	0.101	-0.119	0.29	0.0376	0.919	0.905	0.771	0.97
cg00093643	15	42366802	F	NM_138423;NM_177974	chr15:44580804-44581543	15	-0.329	-0.878	-0.592	0.871	0.742	0.38	0.554	0.384
cg00093686	12	113615525	F		chr12:115130008-115130242	12	-1.59	-1.75	-0.247	-0.654	0.112	0.0804	0.805	0.513
cg00093688	9	139233190	R	NM_014434;NM_001144026;NM_001144028;NM_001144027	chr9:140114800-140115390	9	-0.338	-0.416	0.0538	-0.188	0.735	0.678	0.957	0.851
cg00093794	1	55023405	F	NM_017904;NM_001114108	chr1:55246742-55247519	1	-2.89	-1.51	-1.01	-2.41	0.00391	0.131	0.312	0.0159
cg00093829	10	6287107	F	NM_004566;NM_001145443	chr10:6242975-6246457	10	1.79	1.73	0.581	0.721	0.0735	0.0838	0.561	0.471
cg00093851	7	122982494	F	NM_005000	chr7:123197660-123197925	7	0.96	1.13	0.387	0.113	0.337	0.259	0.699	0.91
cg00093900	1	202647635	F	NM_032833	chr1:204380313-204381159	1	-3.64	-2.45	-1.68	-2.12	0.000276	0.0141	0.0933	0.0341
cg00093956	12	105896561	F	NM_025198;NM_001033050		12	1.06	1.86	0.656	-0.706	0.288	0.0628	0.512	0.48
cg00093971	3	51882626	R			3	-3.22	-1.92	0.334	-3.74	0.00127	0.0548	0.739	0.000183
cg00094006	1	47748594	R		chr1:47973709-47973952	1	4.41	3.17	1.59	2.76	1.03e-05	0.00154	0.111	0.0057
cg00094036	12	70343741	F	NM_031435;NM_144982;NM_144982	chr12:72056768-72057787	12	-1.44	-0.614	-0.161	-1.65	0.149	0.539	0.872	0.0984
cg00094044	1	147130819	R		chr1:148864531-148865184	1	-2.29	-1.76	-1.08	-1.1	0.0219	0.0792	0.282	0.269
cg00094063	16	65471317	F	NM_020786	chr16:66914167-66914782	16	2.06	0.29	1.52	1.84	0.0391	0.772	0.129	0.0657
cg00094095	1	202101319	F	NM_003094	chr1:203830507-203830901	1	3.86	3.15	0.29	2.99	0.000114	0.00161	0.771	0.00279
cg00094158	10	126425785	R		chr10:126431314-126433285	10	3.78	3.53	1.16	1.7	0.00016	0.000415	0.245	0.0896
cg00094244	5	131308116	R		chr5:131280907-131281440	5	5.33	3.63	2.44	3.08	9.93e-08	0.000278	0.0146	0.00207
cg00094256	4	24987536	F	NM_013367	chr4:25378793-25379275	4	-2.75	-3.21	-0.301	-1.06	0.00598	0.00134	0.763	0.29
cg00094269	1	17138154	F	NM_014675		1	-2.87	-1.71	-1.44	-1.81	0.00405	0.0874	0.149	0.0702
cg00094303	16	63596542	R	NM_001797		16	2.5	1.97	1.47	0.886	0.0124	0.0493	0.14	0.375
cg00094319	13	24568530	F	NM_030979	chr13:25670041-25670531	13	-3.4	-1.56	-1.57	-2.74	0.000669	0.119	0.116	0.00611
cg00094333	20	47367131	F		chr20:47934839-47935684	20	3.47	2.3	0.753	2.82	0.000517	0.0217	0.451	0.00485
cg00094412	6	29700833	R	NM_021904;NM_021903;NM_001470	chr6:29595298-29595795	6	-1.16	-0.343	-1.02	-0.697	0.247	0.732	0.307	0.486
cg00094585	1	53403910	F			1	0.714	1.58	1.73	-1.95	0.475	0.115	0.0832	0.0517
cg00094595	12	90299505	F			12	-4.81	-2.58	-2.11	-3.59	1.49e-06	0.00988	0.035	0.00033
cg00094734	2	96194206	F			2	-0.326	-0.304	-1.3	0.909	0.745	0.761	0.193	0.363
cg00094735	5	2002198	F		chr5:1948994-1949227	5	0.988	0.845	0.312	0.518	0.323	0.398	0.755	0.604
cg00094744	2	239592368	F		chr2:239930798-239931057	2	-3.06	-1.94	-1.5	-1.84	0.0022	0.0524	0.135	0.0657
cg00094751	7	99530838	R	NM_005916;NM_182776;NR_029831;NR_029510		7	3.5	2.45	1.53	2.03	0.000457	0.0141	0.127	0.0425
cg00094817	10	35504488	F	NM_182853;NM_183011;NM_183013;NM_182772;NM_183060;NM_181571;NM_182850;NM_182769;NM_001881;NM_183012;NM_182771;NM_182770		10	2.36	1.45	1.86	0.849	0.018	0.147	0.0627	0.396
cg00094858	19	54314901	F	NM_003660;NM_018111	chr19:49622023-49623635	19	-2.83	-1.4	-0.559	-2.82	0.00472	0.162	0.576	0.00474
cg00094898	16	53923451	F		chr16:55365814-55366022	16	-1.1	-0.851	-0.656	-0.398	0.271	0.395	0.512	0.691
cg00094913	3	195602238	R	NM_004488	chr3:194117601-194118988	3	-2.01	-0.812	-0.312	-2.27	0.0448	0.417	0.755	0.0233
cg00094943	7	149723992	F	NM_173680	chr7:150093636-150095229	7	-1.15	-0.904	-1.07	-0.0676	0.25	0.366	0.287	0.946
cg00095018	6	36209316	F	NM_002754	chr6:36098039-36098621	6	1.36	1.43	-0.0215	0.841	0.172	0.152	0.983	0.4
cg00095099	16	20285395	R	NM_174924		16	3.18	2.55	2.13	0.856	0.00147	0.0109	0.0331	0.392
cg00095165	18	46079239	F		chr18:47825069-47825325	18	-1.63	-1.4	-0.398	-0.954	0.103	0.162	0.691	0.34
cg00095214	1	38044787	R	NM_198446;NM_024640;NM_001142726	chr1:38273374-38274402	1	0.353	-0.838	0.667	0.871	0.724	0.402	0.505	0.384
cg00095259	18	57369777	F	NM_031891	chr18:59221451-59221986	18	1.33	1.12	1.13	0.0901	0.185	0.265	0.259	0.928
cg00095276	5	1121111	F	NM_006598	chr5:1068746-1069000	5	4.28	2.57	2.19	2.63	1.88e-05	0.0103	0.0282	0.00854
cg00095326	1	227007572	R			1	-1.58	-0.211	-0.785	-1.75	0.114	0.833	0.432	0.0801
cg00095333	17	67684130	F			17	0.793	0.574	0.828	0.015	0.428	0.566	0.407	0.988
cg00095396	16	86279720	F	NM_020655	chr16:87723171-87724100	16	-0.221	-0.106	-0.043	-0.225	0.825	0.916	0.966	0.822
cg00095431	2	67629285	F			2	-1.71	-0.304	-0.194	-2.4	0.0873	0.761	0.846	0.0166
cg00095523	12	113589868	R		chr12:115104848-115105548	12	-0.0983	-0.683	-0.0323	0.563	0.922	0.495	0.974	0.573
cg00095526	1	199348309	F	NM_000069;NM_000069	chr1:201083458-201084567	1	0.544	-0.284	0.742	0.556	0.586	0.777	0.458	0.578
cg00095629	6	168553919	F		chr6:168812524-168812738	6	-1.22	-1.41	-1.01	0.285	0.223	0.16	0.312	0.775
cg00095677	17	3780488	R	NM_174954;NM_174955;NM_174956;NM_174957;NM_174953;NM_174958;NM_005173		17	-3.68	-2.33	-1.81	-2.21	0.000232	0.0198	0.0707	0.0272
cg00095688	1	1993724	R	NM_001033581;NM_002744	chr1:2005179-2005565	1	3.43	2.91	0.904	1.98	0.000612	0.00361	0.366	0.0482
cg00095728	2	176684327	R		chr2:176977284-176977540	2	-0.934	-0.719	-0.398	-0.481	0.351	0.472	0.691	0.631
cg00095772	2	1040773	R	NM_018968	chr2:1052315-1052730	2	5.24	4.27	2.1	2.58	1.56e-07	1.96e-05	0.0359	0.00976
cg00095846	5	139531272	F		chr5:139554389-139555457	5	2.17	0.746	1.64	1.44	0.0302	0.456	0.102	0.149
cg00095859	7	1303255	R		chr7:1337105-1337388	7	3.64	3.19	1.67	1.37	0.000275	0.0014	0.0954	0.172
cg00095918	7	2236348	F	NM_001013837;NM_001013836;NM_003550	chr7:2272010-2272856	7	-0.0668	0.383	0.312	-0.781	0.947	0.702	0.755	0.435
cg00095930	12	108053499	F			12	-1.28	-1.02	-1.54	0.24	0.2	0.31	0.124	0.81
cg00095936	3	155522691	F	NM_020865;NM_001114397	chr3:154042004-154042376	3	3.71	2.04	2.52	1.93	0.000208	0.0415	0.0118	0.0535
cg00096039	15	23202043	R	NM_000462;NM_130839;NM_130838		15	1.12	0.409	0.366	1.14	0.263	0.682	0.715	0.254
cg00096065	5	150014598	R	NM_007286	chr5:150035968-150036629	5	3.05	2.81	1.03	1.33	0.00229	0.00494	0.302	0.184
cg00096104	13	99345898	F	NM_206808	chr13:100547633-100548911	13	3.58	2.36	1.81	2.01	0.000343	0.0185	0.0698	0.0449
cg00096106	5	100204708	F	NM_005668		5	2.25	1.9	1.76	0.278	0.0245	0.0574	0.0776	0.781
cg00096307	2	106128186	F	NM_025076		2	3.85	2.86	1.62	2.1	0.00012	0.00427	0.104	0.0354
cg00096328	3	41175050	R			3	0.245	1	1.05	-1.55	0.806	0.316	0.292	0.122
cg00096418	16	64467569	R			16	2.21	0.673	1.9	1.34	0.0275	0.501	0.0569	0.179
cg00096419	3	9969967	F	NM_207351	chr3:9993730-9994136	3	3.61	3.31	1.7	1.17	0.000305	0.000925	0.0891	0.241
cg00096447	5	137604607	F		chr5:137577499-137577971	5	1.07	0.409	-0.387	1.73	0.283	0.682	0.699	0.084
cg00096536	4	154931356	R		chr4:154712073-154712706	4	1.7	2.05	0.258	0.518	0.0894	0.0402	0.796	0.604
cg00096603	4	95791145	R	NR_024179;NM_006457;NM_001011513		4	1.06	0.363	0	1.4	0.291	0.717	1	0.16
cg00096742	14	100388110	R	NR_030528;NR_003531;NR_003530;NR_002766		14	3.45	1.87	1.89	2.22	0.000557	0.0609	0.0583	0.0267
cg00096747	16	86500998	F	NM_001739		16	-0.8	-0.574	-0.807	-0.0451	0.424	0.566	0.42	0.964
cg00096806	17	58440701	F	NM_025185		17	2.14	2.07	0.29	1.22	0.0325	0.0389	0.771	0.224
cg00096810	5	178686038	R	NM_021599;NM_014244		5	-1.17	-0.647	-0.796	-0.601	0.243	0.518	0.426	0.548
cg00096845	11	3357186	F	NM_001130519;NM_001130520;NM_007152	chr11:3400155-3400419	11	-3.24	-1.56	-1.19	-2.79	0.00121	0.119	0.232	0.0052
cg00096956	5	34727234	F	NM_001145525;NM_001145520;NM_001145521;NM_015577;NM_001145523;NM_001145522		5	2.37	0.911	1.19	2	0.0179	0.363	0.232	0.0457
cg00096979	16	2056142	F	NM_001077183;NM_000548;NM_001114382	chr16:2114025-2114244	16	3.76	2.36	0.85	3.15	0.00017	0.0185	0.395	0.00161
cg00097038	1	195649394	F	NM_201253		1	2.55	1.82	1.48	1.12	0.0106	0.0686	0.138	0.263
cg00097088	4	2597044	F	NM_003704;NM_003704		4	-0.269	-0.125	-1.7	1.17	0.788	0.9	0.0891	0.241
cg00097144	4	38997702	F	NM_002913		4	5.3	3.58	2.61	2.94	1.14e-07	0.000348	0.00894	0.00323
cg00097357	12	33482603	R	NM_198992	chr12:33591763-33593050	12	2.29	0.218	0.915	2.83	0.0219	0.828	0.36	0.00463
cg00097384	16	29610960	R	NM_014298	chr16:29706198-29706458	16	0.0964	0.442	-0.043	-0.255	0.923	0.658	0.966	0.798
cg00097415	7	127907885	F	NM_018396	chr7:128116667-128117312	7	-1.6	-1.62	0.441	-1.41	0.11	0.106	0.659	0.158
cg00097432	3	115585255	R	NM_001164345;NM_001164346;NM_001164347;NM_001164344;NM_015642;NM_001164343;NM_001164342		3	-1.77	-0.581	-0.484	-1.95	0.077	0.561	0.628	0.0508
cg00097450	17	76087672	R			17	-1.97	-0.158	-1.74	-1.62	0.0493	0.874	0.0813	0.106
cg00097452	1	209372988	F	NM_002238;NM_172362	chr1:211306667-211307675	1	0.147	-0.792	-0.43	1.44	0.883	0.428	0.667	0.149
cg00097518	6	139157169	F		chr6:139116946-139117469	6	3.69	2.45	2.07	1.87	0.000223	0.0141	0.0389	0.0614
cg00097550	22	37150985	F		chr22:38822879-38824193	22	2.5	1.69	0.624	1.92	0.0124	0.0912	0.533	0.0545
cg00097573	1	201097118	F	NR_002929	chr1:202830061-202830923	1	-2.07	-0.422	-0.807	-2.34	0.0387	0.673	0.42	0.0195
cg00097645	19	9186438	F	NM_001005191		19	-2.85	-1.92	-1.7	-1.32	0.00438	0.0548	0.0885	0.186
cg00097790	1	147196844	R	NR_027354;NR_027356;NR_027355		1	-1.71	-1.03	-0.344	-1.51	0.0879	0.303	0.731	0.131
cg00097794	12	49728739	R	NM_001024668;NM_015416	chr12:51441598-51442187	12	1.74	1.19	1.28	0.59	0.0812	0.235	0.202	0.555
cg00097800	2	46446762	R	NM_001430		2	2.09	1.73	0.742	1.08	0.037	0.0842	0.458	0.279
cg00097968	1	150393599	F	NM_001122965		1	-2.26	-1.88	-1.19	-0.82	0.0236	0.06	0.232	0.412
cg00098029	4	188221500	R		chr4:187984505-187984762	4	0.144	-0.0726	0.925	-0.496	0.885	0.942	0.355	0.62
cg00098070	13	112458012	F	NM_015205;NM_032189	chr13:113410004-113410362	13	2.22	1.41	1.97	0.563	0.0262	0.16	0.049	0.573
cg00098144	4	13134333	R		chr4:13524062-13526083	4	-1.17	-1.23	0.29	-0.962	0.242	0.22	0.771	0.336
cg00098162	10	90609553	R			10	3.22	3.19	1.19	1.08	0.0013	0.00144	0.232	0.279
cg00098175	5	1109142	F	NM_006598	chr5:1056321-1056685	5	2	1.78	2.9	-1.02	0.0459	0.0755	0.00372	0.306
cg00098182	15	20544613	R	NM_014608;NM_001033028		15	0.721	2.14	-1.43	0.263	0.471	0.032	0.152	0.793
cg00098297	12	115886196	R	NM_153348;NM_012174		12	-0.26	-0.0858	0.226	-0.548	0.795	0.932	0.821	0.583
cg00098304	15	91380373	R			15	-0.393	-0.726	0.559	-0.406	0.694	0.468	0.576	0.685
cg00098336	1	39045854	F		chr1:39269729-39270251	1	4.01	2.9	2.72	1.36	6.18e-05	0.00369	0.00649	0.174
cg00098451	1	16243221	R	NM_000085		1	-4.27	-2.7	-1.72	-2.89	1.97e-05	0.00696	0.0852	0.00383
cg00098673	15	62172656	F	NM_032231;NM_001014812	chr15:64385875-64386322	15	-3.35	-2.02	-1.99	-1.8	0.00082	0.0435	0.0465	0.0714
cg00098732	X	131924585	R	NM_001077188;NM_147175		23	-0.837	0	-1.02	-0.511	0.403	1	0.307	0.609
cg00098750	16	23635348	R		chr16:23724270-23724775	16	2.51	1.7	0.818	1.77	0.012	0.0899	0.414	0.0775
cg00098799	15	97226883	F	NM_000875		15	1.44	-0.534	0.893	2.2	0.149	0.593	0.372	0.0275
cg00098985	20	1223312	R	NM_014723	chr20:1276887-1277121	20	-1.08	-0.574	-1.1	-0.263	0.28	0.566	0.272	0.793
cg00099017	16	7198023	R	NM_001142334;NM_001142333;NM_018723		16	3.14	2.57	0.871	1.88	0.00168	0.0103	0.383	0.0604
cg00099094	5	2387514	R			5	0.183	-0.125	-1.07	1.37	0.854	0.9	0.287	0.169
cg00099216	1	33203154	R	NM_001127361;NM_153341	chr1:33429531-33430513	1	2.75	0.633	0.646	3.41	0.00595	0.526	0.519	0.000649
cg00099240	22	31784632	F	NM_001135774	chr22:33453892-33454505	22	0.974	0.251	-0.215	1.57	0.33	0.802	0.83	0.116
cg00099295	3	12572720	R	NM_014160	chr3:12598391-12599051	3	0.52	0.297	0.699	-0.0451	0.603	0.767	0.484	0.964
cg00099383	6	168376766	F		chr6:168633706-168633918	6	4.4	2.94	2.36	2.31	1.07e-05	0.00332	0.0185	0.0207
cg00099427	1	158136758	F	NM_012337	chr1:159869901-159870143	1	-0.318	-0.165	-1.4	0.864	0.75	0.869	0.162	0.388
cg00099602	6	88050166	R	NM_198568		6	-2.02	-0.693	-2	-0.924	0.0436	0.488	0.0454	0.356
cg00099766	6	90177424	R	NM_021244	chr6:90120874-90122370	6	0.699	0.759	-0.183	0.556	0.485	0.448	0.855	0.578
cg00099768	1	173428759	F	NM_001162893;NM_001162894;NM_001162895;NM_001162893;NM_014656;NM_001162894	chr1:175161900-175162364	1	-1.12	-0.548	-0.0861	-1.24	0.264	0.584	0.931	0.215
cg00099985	8	49985708	F		chr8:49823343-49823563	8	3.17	2.13	1.57	1.77	0.00151	0.0331	0.116	0.0775
cg00100114	7	101719622	R	NM_020979	chr7:101929503-101931089	7	4.63	3.67	1.55	2.66	3.59e-06	0.000244	0.121	0.00783
cg00100121	1	167663259	F	NM_021179;NM_021179	chr1:169396621-169396869	1	-4.46	-3.48	-1.65	-2.49	8.02e-06	0.000506	0.0997	0.0129
cg00100420	4	106229280	F			4	-2.77	-2.38	-0.818	-1.5	0.00555	0.0175	0.414	0.133
cg00100538	4	184304786	R	NM_024949		4	1.07	0.455	0.43	0.962	0.283	0.649	0.667	0.336
cg00100680	4	4457101	R	NM_014392;NM_001040101		4	3	3.03	1.62	0.499	0.00268	0.00246	0.104	0.618
cg00100703	17	30538998	R	NM_173167;NM_001033576		17	0.995	0.693	2.09	-0.881	0.32	0.488	0.0369	0.378
cg00100762	1	202301551	F			1	-0.476	-0.647	-0.161	0.00751	0.634	0.518	0.872	0.994
cg00100804	9	122875908	F		chr9:123836702-123837585	9	1.8	1.6	0.161	1.24	0.0716	0.109	0.872	0.215
cg00100948	3	187865154	R	NM_000412		3	-0.0581	0.323	-0.43	-0.0526	0.954	0.746	0.667	0.958
cg00101104	19	58911419	R	NR_030203		19	1.86	0.666	1.23	1.37	0.0622	0.505	0.22	0.169
cg00101118	1	51474328	R	NM_014372	chr1:51701767-51702542	1	-3.41	-1.95	-1.32	-2.58	0.000643	0.0516	0.186	0.00998
cg00101154	16	360109	R	NM_006428	chr16:419860-420256	16	-0.917	-0.884	-0.387	-0.293	0.359	0.377	0.699	0.77
cg00101227	1	159546890	R	NM_000530	chr1:161283775-161284007	1	3.92	2.59	2.99	1.29	8.99e-05	0.00951	0.00278	0.196
cg00101260	17	50781656	R			17	-3.26	-1.57	-0.581	-3.37	0.0011	0.116	0.561	0.000765
cg00101350	22	38213138	R	NM_002409;NM_001098270	chr22:39883515-39885010	22	-0.371	0.185	-0.312	-0.541	0.711	0.853	0.755	0.589
cg00101436	7	90593579	R	NM_012395		7	4.03	2.44	2.47	2.09	5.66e-05	0.0146	0.0133	0.0368
cg00101457	10	11286618	F	NM_001025076;NM_006561;NM_001025077;NM_001083591		10	0.371	1.02	-0.043	-0.391	0.71	0.306	0.966	0.696
cg00101555	2	39039285	R	NM_001145451	chr2:39186777-39187968	2	3.8	3.21	2.49	0.894	0.000147	0.00131	0.0129	0.371
cg00101602	10	73527849	R	NM_015947		10	-0.23	-0.033	0.828	-1.08	0.818	0.974	0.407	0.279
cg00101629	1	14941553	R	NM_201628;NM_015209		1	0.655	-0.033	-0.108	1.23	0.512	0.974	0.914	0.218
cg00101712	3	125181898	F	NM_017578		3	-2.31	-1.31	-1.92	-0.849	0.021	0.189	0.0555	0.396
cg00101713	15	30772159	F	NM_003020;NM_001144757		15	4.49	2.81	2.9	2.11	7.12e-06	0.00496	0.00367	0.0348
cg00101715	3	102980165	R	NM_001134456;NM_145037	chr3:101497830-101498648	3	-0.674	-0.396	-0.613	-0.188	0.5	0.692	0.54	0.851
cg00101728	6	2898026	F	NM_004568		6	-0.897	-1.03	-0.409	-0.0901	0.37	0.303	0.683	0.928
cg00101729	6	137284921	F	NM_001008783	chr6:137242315-137245442	6	-1.14	-0.0396	-1.73	-0.346	0.256	0.968	0.0832	0.729
cg00101940	16	84036802	R			16	1.59	1.02	-0.377	1.97	0.111	0.31	0.706	0.0491
cg00102093	1	230412546	R			1	3.42	2.33	3	0.712	0.000625	0.0198	0.00268	0.476
cg00102166	1	43197924	R	NM_006516	chr1:43423467-43424768	1	-2.31	-1.71	-1.13	-1.13	0.0212	0.0874	0.259	0.26
cg00102183	1	109573962	R	NM_006513		1	-0.0024	-0.106	-1.21	1.16	0.998	0.916	0.228	0.244
cg00102266	1	121131357	R			1	-2.37	-1.91	-1.08	-1.07	0.0179	0.0565	0.282	0.283
cg00102615	9	138514780	F	NM_017617	chr9:139395020-139395287	9	4.02	1.81	0.699	4.3	5.73e-05	0.0706	0.484	1.73e-05
cg00102685	3	188128347	R		chr3:186648174-186649103	3	4.03	3.33	2.21	1.42	5.54e-05	0.000862	0.0274	0.156
cg00102726	21	45721609	R	NM_130444;NM_030582;NM_130445	chr21:46897841-46898158	21	3.01	3.11	1.15	0.849	0.0026	0.00184	0.25	0.396
cg00102731	20	2677245	R	NM_001110514	chr20:2729997-2730797	20	1.19	0.904	1.61	-0.331	0.233	0.366	0.108	0.741
cg00102955	1	148496969	F	NM_012113;NM_012113		1	-1.6	-0.218	-1.09	-1.51	0.111	0.828	0.277	0.131
cg00102996	9	91410437	R	NM_006705	chr9:92219771-92221411	9	1.88	0.97	-0.592	2.69	0.0599	0.332	0.554	0.00716
cg00103209	1	203319888	F	NM_203376		1	4.25	3.01	2.17	2.14	2.16e-05	0.00262	0.0298	0.0323
cg00103299	15	91163251	R			15	-0.734	-0.706	-1.36	0.684	0.463	0.48	0.175	0.494
cg00103329	1	202388546	R	NM_018208	chr1:204120398-204121109	1	-0.631	0.37	-1.33	-0.27	0.528	0.712	0.182	0.787
cg00103398	1	172100778	F	NR_002746;NR_002578;NR_003938;NR_003940	chr1:173837172-173837917	1	2.58	1.87	1.13	1.42	0.00988	0.0609	0.259	0.156
cg00103401	6	147612421	F	NM_001127715;NM_139244		6	0.436	0.93	-0.699	0.391	0.663	0.352	0.484	0.696
cg00103448	17	43955532	F		chr17:46604362-46604881	17	-0.999	-0.348	-0.828	-0.593	0.318	0.728	0.407	0.553
cg00103568	1	6581853	R	NM_014851	chr1:6659125-6659505	1	1.73	1.66	0.0968	1.12	0.0838	0.0977	0.923	0.263
cg00103771	6	32633783	F	NR_001298		6	-0.82	-0.726	-0.334	-0.338	0.412	0.468	0.738	0.735
cg00103778	20	29659702	F		chr20:30196118-30196585	20	-1.86	-1.08	-0.656	-1.44	0.0627	0.279	0.512	0.149
cg00103785	1	153309946	R		chr1:155043412-155043922	1	0.307	0.732	0.183	-0.398	0.759	0.464	0.855	0.691
cg00103855	1	224144251	F	NM_020997	chr1:226075150-226075680	1	2.64	2.03	0.172	2.21	0.00826	0.0428	0.863	0.0272
cg00103908	1	3173966	R	NM_022114;NM_199454	chr1:3184546-3184824	1	2.06	1.29	2.16	0.233	0.0399	0.198	0.0306	0.816
cg00103961	20	61566573	R	NM_172108;NM_172106;NM_172107;NM_172109;NM_004518	chr20:62097193-62098254	20	-0.414	-0.746	-0.764	0.744	0.679	0.456	0.445	0.457
cg00104072	6	85544485	F		chr6:85482569-85484718	6	1.13	0.119	0.646	1.22	0.257	0.905	0.519	0.224
cg00104098	1	2292043	F	NM_024848	chr1:2304159-2304376	1	2.27	1.93	0.646	1.26	0.0235	0.054	0.519	0.207
cg00104167	16	85510696	R			16	1.45	-0.0462	1.28	1.37	0.146	0.963	0.2	0.172
cg00104267	9	115142561	F	NM_145241;NM_001012361	chr9:116102409-116102717	9	-4.59	-2.64	-2.18	-3.09	4.35e-06	0.0083	0.029	0.00197
cg00104348	12	10663691	R	NM_018423		12	3.14	2.03	2.13	1.31	0.00171	0.0421	0.0331	0.189
cg00104562	19	7673229	F	NM_002002		19	0.858	1.04	0.592	-0.143	0.391	0.3	0.554	0.887
cg00104570	3	101019339	R	NR_031662;NM_032359	chr3:99536613-99537023	3	-3.05	-1.85	-1.59	-1.84	0.00226	0.065	0.111	0.0658
cg00104608	3	76229191	R			3	-0.731	-0.244	-0.473	-0.563	0.465	0.807	0.636	0.573
cg00105025	6	29081462	R	NM_001010877		6	-0.0822	1.68	-1.13	-0.879	0.935	0.0924	0.259	0.379
cg00105041	12	7668359	F		chr12:7781003-7781248	12	2.08	2.45	-0.258	1.2	0.0378	0.0144	0.796	0.229
cg00105102	1	154483802	F	NM_024897;NM_198406	chr1:156215368-156215899	1	-0.0041	0.455	-0.43	-0.0977	0.997	0.649	0.667	0.922
cg00105253	14	104718239	R	NM_177533	chr14:105647469-105647827	14	1.8	0.343	0.398	2.32	0.0724	0.732	0.691	0.0203
cg00105306	15	82995982	R	NM_032856	chr15:85197232-85197695	15	-0.0227	0.191	-0.968	0.616	0.982	0.848	0.333	0.538
cg00105400	19	50908019	F	NM_001080469	chr19:46214961-46216180	19	1.82	2.2	1.94	-0.927	0.0694	0.0275	0.0528	0.354
cg00105512	16	75803346	F	NM_001129979	chr16:77245944-77247013	16	2.57	1.84	1	1.55	0.0101	0.0656	0.317	0.12
cg00105628	20	21035165	R		chr20:21086139-21087175	20	2.6	1.21	0.43	2.76	0.00924	0.225	0.667	0.00579
cg00105640	1	3681854	F	NM_001163724	chr1:3688553-3689684	1	0.715	0.066	1.09	0.18	0.475	0.947	0.277	0.857
cg00105753	17	27461967	F			17	2.89	1.66	1.37	1.95	0.00389	0.0963	0.172	0.0517
cg00106073	1	154350958	F	NM_170707;NM_005572;NM_170708	chr1:156084486-156085097	1	-3.31	-2.06	-1.1	-2.48	0.000935	0.0395	0.271	0.0132
cg00106093	6	33499319	R	NM_006772	chr6:33393592-33393908	6	3.39	1.96	0.437	3.28	0.000708	0.05	0.662	0.00103
cg00106196	1	3162544	F	NM_022114;NM_199454		1	0.678	0.587	0.269	0.3	0.498	0.557	0.788	0.764
cg00106254	7	1910230	F	NM_003550;NM_001013837;NM_001013836		7	-1.09	-0.627	-0.807	-0.473	0.277	0.531	0.42	0.636
cg00106345	7	27104921	F		chr7:27135342-27136736	7	-0.38	-1.08	-0.484	0.894	0.704	0.282	0.628	0.371
cg00106432	15	82331270	R	NM_207517		15	2.23	2.17	2.05	-0.293	0.0259	0.0299	0.0399	0.77
cg00106565	5	146764364	F	NM_001387		5	3.47	2.45	2.24	1.35	0.000521	0.0144	0.0252	0.176
cg00106591	16	34066518	F		chr16:34208200-34209248	16	1.71	2.15	0.516	0.203	0.0879	0.0315	0.606	0.839
cg00106609	22	49056689	F	NM_012401	chr22:50716018-50716656	22	3.15	1.76	0.603	2.97	0.00163	0.0792	0.547	0.00301
cg00106621	7	8267253	R	NM_004968;NM_022307;NM_001136020	chr7:8301031-8302252	7	1.05	0.739	0.958	0.165	0.293	0.46	0.338	0.869
cg00106739	5	177589917	F	NM_153373	chr5:177659197-177659927	5	4.38	2.58	1.57	3.33	1.21e-05	0.00988	0.116	0.000875
cg00106744	21	26028799	F	NM_001003697;NM_001685;NM_001003701;NM_001003703;NM_001003696;NM_002040	chr21:27106814-27108211	21	-2.3	-1.72	-1	-1.22	0.0215	0.0862	0.317	0.221
cg00106767	18	5231864	F	NR_015389	chr18:5237723-5238674	18	3.72	1.99	2.09	2.38	0.000199	0.047	0.0369	0.0173
cg00106808	2	3024064	R			2	2.38	1.19	1.62	1.34	0.0174	0.232	0.104	0.179
cg00106920	3	49597927	F	NM_003458		3	0.91	1.31	0.409	-0.18	0.363	0.189	0.683	0.857
cg00106923	20	49053043	R		chr20:49620446-49620680	20	4.56	3.16	2.51	2.22	5.02e-06	0.00157	0.0122	0.0262
cg00106925	21	44705533	R		chr21:45883589-45883907	21	1.66	0.574	1.87	0.552	0.0973	0.566	0.0612	0.581
cg00106942	12	42486791	R	NM_002822	chr12:44199630-44200405	12	-2.54	-0.416	-1.88	-2.19	0.0112	0.678	0.0597	0.0288
cg00107046	1	16338149	R	NM_004431	chr1:16464376-16464621	1	-0.372	-0.548	0.861	-0.819	0.71	0.584	0.389	0.413
cg00107106	16	19088644	R	NM_016524	chr16:19179002-19180217	16	-0.267	0.264	-0.043	-0.684	0.79	0.792	0.966	0.494
cg00107241	1	29333657	R		chr1:29460810-29461172	1	-1.31	-0.368	-0.603	-1.29	0.191	0.713	0.547	0.196
cg00107285	12	122975757	F	NM_207437		12	2.13	1.6	1.68	0.466	0.0331	0.11	0.0933	0.641
cg00107488	22	18310437	R	NM_000754;NM_006440	chr22:19929096-19929468	22	-0.276	0.132	0.204	-0.781	0.782	0.895	0.838	0.435
cg00107490	22	17889318	R		chr22:19510871-19512254	22	0.273	0.172	0.28	0.0376	0.785	0.864	0.78	0.97
cg00107577	2	46989650	F	NM_001171509;NM_001171508;NM_139279;NM_001171510;NM_001171507;NM_001171511;NM_001171506		2	-2.15	-1.68	-0.785	-1.21	0.0312	0.0937	0.432	0.227
cg00107579	5	159331248	F	NM_000679	chr5:159399004-159399928	5	-0.121	0.172	-0.441	0.00751	0.904	0.864	0.659	0.994
cg00107603	19	19377022	R	NM_017660	chr19:19516021-19517383	19	-3.24	-2.55	-0.915	-2.03	0.00119	0.0109	0.36	0.0425
cg00107629	11	46345883	R	NM_001105540;NM_201533;NM_003646;NM_201532	chr11:46389074-46389378	11	-1.92	-1.42	-0.904	-0.969	0.0554	0.156	0.366	0.333
cg00107630	9	119214229	R	NM_198186;NM_014010;NM_198187	chr9:120175253-120177496	9	1.09	-0.64	-0.592	3.02	0.275	0.522	0.554	0.00253
cg00107667	12	130507471	R		chr12:131943519-131943761	12	0.18	-0.35	-0.0323	0.691	0.858	0.727	0.974	0.49
cg00107890	15	69279800	F	NM_024817		15	-0.128	0.231	-0.516	0	0.898	0.817	0.606	1
cg00107914	6	31700061	F	NM_080686	chr6:31587779-31589024	6	4.21	3.52	2.02	1.68	2.53e-05	0.000426	0.0431	0.0924
cg00107916	5	3241066	F		chr5:3188099-3188375	5	-2.32	-1.51	-1.64	-0.909	0.0204	0.131	0.102	0.363
cg00107970	1	154386081	R			1	-1.47	-0.574	-1.54	-0.533	0.141	0.566	0.124	0.594
cg00107982	22	36143044	F	NM_052906	chr22:37815803-37816477	22	-0.534	-0.396	-1.34	0.684	0.593	0.692	0.179	0.494
cg00108038	12	1479506	R	NR_028415		12	2.79	2.19	2.22	0.496	0.00523	0.0285	0.0267	0.62
cg00108056	X	153280511	F	NM_006013;NR_026898;NR_000011	chrX:153626095-153627324	23	-0.0926	-0.528	-0.387	0.729	0.926	0.598	0.699	0.466
cg00108098	3	124120354	F	NM_001031702	chr3:122640713-122641355	3	-1.86	-1.34	-0.043	-1.72	0.0623	0.18	0.966	0.0854
cg00108108	16	87524371	F	NM_175931;NM_005187	chr16:88999662-89000346	16	3.61	2.15	1.44	2.6	0.000303	0.0315	0.149	0.00935
cg00108282	7	811573	F			7	0.861	0.6	2.43	-1.31	0.389	0.548	0.015	0.191
cg00108349	13	23812657	R		chr13:24914548-24915100	13	0.447	0.8	0.4	-0.421	0.655	0.423	0.689	0.674
cg00108351	16	85087159	R		chr16:86530747-86532994	16	-1.71	-2.18	-0.979	0.233	0.0873	0.029	0.328	0.816
cg00108454	1	22836201	F	NM_015991		1	2.14	1.37	0.43	1.81	0.0324	0.17	0.667	0.0702
cg00108694	5	55634195	R			5	5.26	4.78	2.68	1.57	1.48e-07	1.78e-06	0.00738	0.116
cg00108715	3	52540055	F	NM_001134231;NM_022908	chr3:52567009-52568807	3	-0.482	-0.653	-0.603	0.391	0.629	0.514	0.547	0.696
cg00108716	1	226669023	F	NM_001024941;NM_001134855;NM_001024940;NM_016102	chr1:228603706-228604567	1	1.76	2.28	0.409	0.24	0.0791	0.0224	0.683	0.81
cg00108737	X	117512269	R		chrX:117629130-117629377	23	3.89	2.26	1.59	2.82	9.85e-05	0.0236	0.111	0.00474
cg00108873	9	137799564	F	NM_020822	chr9:138660497-138661224	9	-0.185	0.904	-1.43	0.015	0.853	0.366	0.152	0.988
cg00108894	7	138636470	F	NM_173569		7	2.93	2.37	1.47	1.2	0.00335	0.0178	0.14	0.229
cg00108944	12	74071122	R	NM_152436	chr12:75784799-75785241	12	0.556	0.884	0.882	-0.751	0.578	0.377	0.378	0.453
cg00108992	16	12099826	R	NM_001080530		16	-1.04	-0.257	-0.0323	-1.46	0.296	0.797	0.974	0.143
cg00109012	4	166252071	R	NM_001100389	chr4:166033368-166034212	4	1.94	0.765	0.377	2.15	0.0523	0.444	0.706	0.0317
cg00109069	16	83990953	R			16	-1.11	0.337	0.484	-2.64	0.266	0.736	0.628	0.00819
cg00109076	13	87128464	F	NM_015567	chr13:88329394-88329885	13	-3.01	-1.37	-1.73	-2.13	0.00264	0.17	0.0832	0.0334
cg00109131	5	150663232	R	NM_181774;NM_001145017;NM_181774;NM_001145017		5	2.96	1.6	2.35	1.28	0.00307	0.11	0.019	0.202
cg00109164	1	165289235	F	NM_005814		1	3.58	3.02	1.78	1.36	0.000338	0.00251	0.0759	0.174
cg00109293	1	3139690	F	NM_022114;NM_199454	chr1:3147845-3148081	1	-0.248	0.501	-1.19	0.118	0.805	0.616	0.232	0.906
cg00109300	6	143307499	F	NM_006734	chr6:143265719-143268791	6	-2.78	-1.77	-0.839	-2.12	0.00546	0.077	0.401	0.0341
cg00109302	3	148578788	F			3	-1.03	-0.984	-1.73	0.796	0.302	0.325	0.0832	0.426
cg00109344	9	115384353	R	NM_130795;NM_021106;NM_144488;NM_134427	chr9:116346400-116346603	9	-0.365	-0.468	0.43	-0.511	0.715	0.639	0.667	0.609
cg00109451	10	88431319	F	NM_001171611;NM_001080116;NM_001080115;NM_001080114;NM_007078;NM_001171610		10	2.04	0.838	0.527	2.11	0.0412	0.402	0.598	0.0348
cg00109703	20	38753419	F		chr20:39321289-39321647	20	1.14	1.08	-0.549	1.3	0.253	0.282	0.583	0.194
cg00109764	3	43786312	R			3	-0.133	-0.732	-1.17	1.56	0.894	0.464	0.241	0.118
cg00109776	19	58924144	R	NR_030209		19	4.53	3.14	2.8	1.94	5.78e-06	0.00168	0.00515	0.0526
cg00109923	7	6598045	R	NM_024067	chr7:6629328-6630235	7	1.76	1	1.89	0.263	0.0786	0.316	0.0583	0.793
cg00110039	22	16018932	R	NR_024483;NM_017829;NM_033070;NR_024482	chr22:17639481-17640714	22	4.1	2.18	0.828	3.92	4.16e-05	0.029	0.407	8.81e-05
cg00110171	18	75280794	R	NM_006162;NM_172388;NM_172389;NM_172387;NM_172390	chr18:77180182-77180841	18	3.75	2.58	1.9	1.98	0.000178	0.00988	0.0569	0.0483
cg00110277	10	97658164	F	NM_001130446	chr10:97667243-97667978	10	3.12	2.11	0.947	2.24	0.00183	0.0347	0.344	0.0252
cg00110545	10	6665495	R		chr10:6621907-6622642	10	3.89	2.16	2.51	2.12	9.95e-05	0.0304	0.0122	0.0341
cg00110609	16	4251800	F	NM_003223	chr16:4311695-4311942	16	-0.635	-0.399	-1.07	0.278	0.525	0.69	0.287	0.781
cg00110687	17	78582354	F	NM_001009905	chr17:80989059-80989392	17	2.11	1.85	0.334	1.36	0.0345	0.0647	0.739	0.173
cg00110688	12	92295434	F	NM_199040;NR_002212;NM_019094	chr12:93771465-93772289	12	1.79	1.38	0.0538	1.54	0.074	0.168	0.957	0.124
cg00110695	6	99465457	R	NM_012160		6	-1.76	-0.0792	-1.11	-1.92	0.0776	0.937	0.268	0.0554
cg00110769	1	109923612	F	NM_006496		1	0.121	0.0264	-0.0215	0.195	0.904	0.979	0.983	0.845
cg00110785	7	45894472	R	NM_000596	chr7:45928002-45928585	7	0.759	0.0528	-0.581	1.74	0.448	0.958	0.561	0.0827
cg00110790	6	33763792	R	NM_002224	chr6:33655966-33656238	6	2.47	1.69	1.57	1.03	0.0137	0.0912	0.116	0.303
cg00110832	6	32229108	R	NM_138717;NM_005155;NM_030651	chr6:32121829-32122529	6	-0.201	-0.409	-0.108	0.179	0.841	0.682	0.914	0.858
cg00110846	7	77507179	R	NM_012301	chr7:77669670-77670057	7	4.31	2.98	1.24	3.09	1.67e-05	0.00292	0.216	0.00197
cg00110917	7	67638337	R			7	1.8	1.08	0.161	1.77	0.0726	0.279	0.872	0.0768
cg00111102	20	59943370	R	NM_001794	chr20:60511720-60512095	20	1.26	0.297	1.65	0.376	0.206	0.767	0.0997	0.707
cg00111239	X	71155054	R	NM_001013627	chrX:71238328-71238675	23	0.389	0.831	-0.204	-0.0225	0.698	0.406	0.838	0.982
cg00111333	1	197094872	R	NR_029612;NR_029626		1	2.26	1.41	1.21	1.28	0.024	0.158	0.228	0.199
cg00111335	8	583194	F			8	-0.0924	-0.00335	-0.258	0.0751	0.926	0.997	0.796	0.94
cg00111466	2	47771531	R		chr2:47917888-47918414	2	-3.65	-1.37	-2.28	-2.73	0.000266	0.172	0.0226	0.0064
cg00111532	16	540999	R	NM_005632	chr16:604801-605348	16	5.35	3.72	2.14	3.3	8.67e-08	0.000198	0.0327	0.000975
cg00111665	2	236784925	R	NM_212556	chr2:237119978-237120257	2	-1.52	0.739	-3.5	-0.24	0.129	0.46	0.000471	0.81
cg00111697	1	802623	R	NR_027055		1	-0.122	-0.277	0.0323	0.0526	0.903	0.782	0.974	0.958
cg00111778	2	3811002	R		chr2:3833815-3834318	2	0.693	1.32	1.22	-1.26	0.488	0.187	0.224	0.207
cg00111823	22	36809161	F	NM_013356	chr22:38476836-38478839	22	0.431	-0.375	0.595	0.59	0.666	0.708	0.552	0.555
cg00111826	5	8036865	R			5	2.43	1.99	1.76	0.488	0.0152	0.047	0.0776	0.625
cg00111977	10	75071242	R	NM_021245;NM_021245		10	-1.7	-0.534	-0.441	-1.93	0.0884	0.593	0.659	0.0535
cg00111978	2	102344961	R	NM_003855		2	2.98	1.91	1.68	1.57	0.00292	0.0565	0.0933	0.116
cg00112042	1	145022489	F		chr1:146556312-146556676	1	2.56	1.99	0.764	1.59	0.0105	0.047	0.445	0.111
cg00112048	8	145030119	F			8	4.78	3.33	1.62	3.19	1.72e-06	0.000861	0.104	0.00141
cg00112056	4	53927172	R	NM_152540	chr4:54231708-54232320	4	-1.98	-0.277	-0.549	-2.57	0.0475	0.782	0.583	0.0102
cg00112238	1	54492526	R	NM_001009955;NM_018070;NM_145716	chr1:54723696-54724019	1	2.42	2.14	0.506	1.43	0.0153	0.0325	0.613	0.151
cg00112256	X	117513956	F	NM_144658;NM_144658	chrX:117629624-117630776	23	3.88	1.37	1.38	3.91	0.000107	0.172	0.168	9.38e-05
cg00112260	1	31877507	F	NM_012392		1	-0.0235	1.41	-0.828	-0.766	0.981	0.158	0.407	0.444
cg00112309	8	106857158	R	NM_012082		8	-0.512	0.158	-0.559	-0.533	0.609	0.874	0.576	0.594
cg00112314	10	134457417	R		chr10:134607423-134607880	10	0.955	0.112	0.0323	1.46	0.339	0.911	0.974	0.143
cg00112341	3	55966064	R	NM_015576		3	2.4	2.45	1.07	0.578	0.0163	0.0141	0.287	0.563
cg00112367	5	177494930	R	NM_022762	chr5:177557550-177558393	5	1.29	1.02	0.904	0.323	0.197	0.306	0.366	0.747
cg00112493	4	110444400	R	NM_198721;NM_032518	chr4:110222970-110224257	4	1.96	1.78	1.38	0.248	0.0504	0.0748	0.168	0.804
cg00112558	7	102119694	R		chr7:102329950-102330654	7	2.65	1.43	1.22	1.92	0.00808	0.152	0.224	0.0554
cg00112588	1	176328568	R	NR_027982;NM_170692	chr1:178062712-178063846	1	-0.836	-1.29	-0.118	0.0225	0.403	0.198	0.906	0.982
cg00112685	19	11452190	F	NM_032281;NM_001420	chr19:11590295-11593643	19	-1.12	-1.7	-0.57	0.361	0.262	0.0899	0.569	0.718
cg00112723	2	219802870	R	NM_024085;NM_001042410;NM_018089;NM_001042410;NM_001077198	chr2:220093972-220094697	2	-4.36	-2.9	-1.74	-2.82	1.27e-05	0.00369	0.0813	0.00474
cg00112798	16	86177464	R			16	3.14	2.57	0.667	2.04	0.00171	0.0101	0.505	0.041
cg00112952	1	245683146	F	NM_001004492	chr1:247614695-247614944	1	4.1	2.92	2.8	1.43	4.17e-05	0.00354	0.00515	0.151
cg00113020	19	59865294	R	NM_006847;NM_001081438		19	3.26	2.4	2.08	1.19	0.0011	0.0163	0.0378	0.232
cg00113050	10	102746304	R	NM_032429	chr10:102756834-102759798	10	0.956	1.32	1.42	-0.999	0.339	0.187	0.156	0.318
cg00113096	2	133836275	F	NM_207363;NM_207481		2	-2.06	-1.04	-0.366	-2.07	0.0398	0.297	0.715	0.0389
cg00113117	1	56719342	F		chr1:56943401-56943669	1	2.83	2.95	0.0538	1.68	0.00468	0.00318	0.957	0.0939
cg00113194	1	874732	F	NM_015658	chr1:886356-886602	1	-0.334	0.475	0.226	-1.25	0.739	0.635	0.821	0.212
cg00113225	10	63936530	R	NM_199451		10	3.49	2.15	1.65	2.21	0.000483	0.0315	0.0992	0.0272
cg00113315	1	9020622	R	NM_003039;NR_024180	chr1:9099280-9100513	1	2.77	2.29	2.18	0.383	0.00562	0.022	0.029	0.702
cg00113321	7	157222938	R	NM_002847;NM_130842;NM_130843	chr7:157524157-157526741	7	0.0661	0.501	1.21	-1.47	0.947	0.616	0.228	0.141
cg00113369	1	2967721	R	NR_015440	chr1:2979275-2980758	1	-0.828	0.633	-0.104	-1.95	0.408	0.526	0.917	0.0508
cg00113554	17	45195834	F	NM_030802	chr17:47840834-47841377	17	-3.55	-1.29	-1.6	-3.24	0.000383	0.196	0.109	0.00121
cg00113623	X	153293415	F	NM_000116;NM_181312;NM_001009934;NM_001009932;NM_181313;NR_024048;NM_001009933;NM_181311	chrX:153639734-153640675	23	0.547	0.403	-0.355	0.819	0.584	0.687	0.723	0.413
cg00113663	5	135243	F		chr5:83428-85530	5	0.224	0.68	1.05	-1.25	0.822	0.497	0.292	0.212
cg00113675	6	29963326	R	NR_001434	chr6:29855295-29856565	6	1.43	-0.0132	0.699	1.81	0.152	0.989	0.484	0.0702
cg00113712	1	2376311	F		chr1:2387669-2388086	1	2.23	1.29	0.753	1.76	0.0258	0.196	0.451	0.0788
cg00114008	1	26987010	R	NM_017837	chr1:27114118-27114692	1	1.04	1.39	-0.646	0.894	0.297	0.166	0.519	0.371
cg00114012	9	129197965	F	NM_014580	chr9:130158774-130159057	9	0.899	0.475	1.05	0.0977	0.368	0.635	0.292	0.922
cg00114029	1	35123994	R	NM_001080418	chr1:35350878-35351854	1	0.92	0.521	0.441	0.623	0.358	0.602	0.659	0.533
cg00114084	1	33275238	R	NM_013411;NM_001625	chr1:33502201-33502719	1	-0.399	-0.119	0.118	-0.654	0.69	0.905	0.906	0.513
cg00114132	18	8647945	F		chr18:8659443-8659672	18	0.9	1.41	-1.21	1.13	0.368	0.16	0.228	0.26
cg00114159	16	83873602	R		chr16:85317749-85318003	16	2.26	1.94	0.258	1.59	0.0236	0.0524	0.796	0.113
cg00114160	6	29538075	F	NM_030883		6	0.666	0.403	0.0861	0.631	0.505	0.687	0.931	0.528
cg00114312	16	1360426	R	NM_023076	chr16:1420170-1420442	16	-3.13	-2.62	-1.32	-1.4	0.00178	0.00886	0.186	0.16
cg00114346	7	156900647	R	NM_058246	chr7:157208794-157209008	7	1.29	1.78	-0.226	0.541	0.196	0.0748	0.821	0.589
cg00114383	16	28869673	R	NM_032815	chr16:28961913-28962791	16	-2.93	-1.91	-0.925	-2.16	0.00334	0.0557	0.355	0.0311
cg00114393	3	147362120	R	NM_000935;NM_182943	chr3:145878430-145879287	3	-3.97	-2.34	-1.71	-2.76	7.22e-05	0.0192	0.0871	0.0057
cg00114478	8	73820664	R	NM_004770		8	-1.34	-1.18	-0.0215	-1.02	0.18	0.238	0.983	0.307
cg00114503	3	180233140	F	NM_022470;NM_152240		3	1.08	0.97	0.71	0.195	0.28	0.332	0.478	0.845
cg00114569	14	64309080	R	NM_000347;NM_001024858	chr14:65239322-65239666	14	-1.71	0.205	-1.09	-2.14	0.0866	0.838	0.277	0.0323
cg00114618	5	64702000	R	NM_197941		5	0.669	-1.3	1.38	1.25	0.504	0.194	0.168	0.21
cg00114625	X	24393399	F	NM_001142386;NM_001142386;NM_005391;NM_005391	chrX:24483016-24483947	23	1.34	1.2	0.151	0.879	0.182	0.23	0.88	0.379
cg00114694	15	38432020	F	NM_001145643		15	1.79	1.29	0.473	1.28	0.073	0.198	0.636	0.202
cg00114710	1	152739964	F	NM_001098475;NM_182499;NM_001010846	chr1:154474107-154475699	1	3.93	3.17	2.14	1.46	8.63e-05	0.0015	0.0323	0.145
cg00114784	15	95123508	R			15	-1.38	1.02	-1.09	-2.42	0.167	0.31	0.277	0.0156
cg00114913	X	117991568	F	NM_024778;NM_001031855	chrX:118107469-118107949	23	0.307	0.0462	-0.764	1.14	0.758	0.963	0.445	0.254
cg00114966	1	196160543	R	NM_020204;NM_001014434	chr1:197890478-197890824	1	3.43	2.34	1.68	1.88	0.000614	0.0192	0.0933	0.0604
cg00115102	22	20982334	R	NR_027293		22	-2.36	-1.93	-0.764	-1.31	0.0184	0.0532	0.445	0.191
cg00115149	10	111725477	R			10	2.27	1.62	1.51	0.819	0.0234	0.105	0.132	0.413
cg00115178	10	12688182	R	NM_020397;NM_153498		10	3.29	2.42	1.96	1.31	0.00102	0.0154	0.0502	0.189
cg00115194	9	124018267	R	NM_199160;NM_014368	chr9:124979329-124979599	9	4.76	3.19	1.48	3.43	1.89e-06	0.00144	0.138	0.000597
cg00115288	11	695892	R	NM_022772	chr11:705794-706534	11	2.91	1.45	1.66	1.95	0.00367	0.148	0.0975	0.0517
cg00115297	15	81206513	F			15	4.04	2.6	1.31	2.97	5.37e-05	0.00933	0.189	0.00301
cg00115458	6	33249283	R	NM_080679;NM_080681;NM_080680		6	-0.531	-0.132	-0.729	-0.12	0.595	0.895	0.466	0.904
cg00115511	X	46289743	F	NR_015378;NM_001146291;NM_001039891	chrX:46404634-46405165	23	-2.34	-1.27	-0.549	-2.14	0.0194	0.203	0.583	0.0323
cg00115567	6	44387339	R	NM_020745	chr6:44280719-44281198	6	-0.41	0.475	-0.915	-0.376	0.682	0.635	0.36	0.707
cg00115639	17	52056691	R			17	0.388	0.66	1.47	-1.32	0.698	0.509	0.14	0.186
cg00115654	9	135284741	R	NR_024514;NM_139027;NM_139025;NM_139026	chr9:136294738-136295236	9	1.77	0.165	0.667	2.22	0.0767	0.869	0.505	0.0262
cg00115747	17	72451621	F	NM_144677;NM_198955		17	-0.598	0.224	-0.0323	-1.21	0.55	0.822	0.974	0.227
cg00115864	3	33885463	R	NM_001162429;NR_027867;NM_013374		3	1.8	1.82	1.45	-0.12	0.0716	0.0686	0.146	0.904
cg00115954	8	11573960	F		chr8:11536767-11538961	8	-0.787	-0.495	-0.226	-0.616	0.431	0.621	0.821	0.538
cg00115984	9	32541741	F	NM_005802	chr9:32550559-32552532	9	-3.62	-2.05	-2.15	-2.09	0.000295	0.0402	0.0314	0.0368
cg00116058	5	154300845	R	NM_001014990;NM_014180;NM_001014990;NM_014180	chr5:154317459-154317930	5	-4.52	-2.63	-1.43	-3.65	6.1e-06	0.00863	0.152	0.000261
cg00116092	1	215379667	R		chr1:217310749-217311178	1	1.51	0.937	0.334	1.28	0.132	0.349	0.739	0.202
cg00116172	2	3368724	R	NM_016030	chr2:3391402-3392500	2	3.95	2.59	2.43	1.84	7.95e-05	0.00969	0.015	0.0657
cg00116234	9	18464243	R	NM_052866;NM_001040272		9	-3.68	-2.37	-1.94	-2.05	0.000234	0.0178	0.0528	0.0403
cg00116265	X	46191055	F	NM_001129900;NM_001129898;NM_017776;NM_001129899	chrX:46306249-46306838	23	-0.447	-1.04	0.828	-0.413	0.655	0.3	0.407	0.679
cg00116305	8	31614674	F		chr8:31496525-31498346	8	2.88	2.16	1.71	1.12	0.00398	0.0309	0.0864	0.263
cg00116315	6	35574246	F	NM_003322;NM_003214	chr6:35464056-35466269	6	0.322	0.376	0.151	0.0225	0.747	0.707	0.88	0.982
cg00116418	8	911945	R		chr8:923762-923974	8	2.98	3.18	2.87	-0.781	0.00286	0.00147	0.00407	0.435
cg00116430	1	93960856	F			1	0.5	0.0726	0.409	0.409	0.617	0.942	0.683	0.683
cg00116554	8	49996386	R	NM_003068;NM_003068	chr8:49835987-49836231	8	-3.64	-2.73	-1.14	-2.32	0.000271	0.00643	0.254	0.0203
cg00116686	1	27950118	R	NM_001143915;NM_152660;NM_001143912;NM_001143913;NM_001143914		1	2.04	1.55	1.25	0.736	0.0415	0.121	0.212	0.462
cg00116699	2	239870197	F	NM_006037		2	-0.488	0.627	-0.226	-1.27	0.625	0.531	0.821	0.204
cg00116709	X	48907035	R	NM_001099681;NM_001099680;NM_001099682;NM_024859	chrX:49019722-49020307	23	0.106	0.125	0.203	-0.128	0.915	0.9	0.839	0.898
cg00116766	16	9765115	F	NM_001134407;NM_000833;NM_001134408		16	-0.263	0.429	0.258	-1.11	0.793	0.668	0.796	0.266
cg00116838	19	50693586	R	NM_005619;NM_001080401;NM_206900	chr19:46001830-46002686	19	-1.42	-0.589	0.0323	-1.82	0.154	0.556	0.974	0.0691
cg00116946	5	172319687	F	NM_016093;NR_026683;NR_026682	chr5:172386893-172387102	5	0.667	0.673	-0.409	0.789	0.505	0.501	0.683	0.43
cg00117005	6	33396973	F	NM_001141969;NR_024517;NM_001350;NM_001141970	chr6:33288733-33289008	6	1.32	0.878	-1.59	2.72	0.187	0.38	0.111	0.00654
cg00117012	15	71783411	R	NM_001024736;NM_025240		15	3.93	2.66	0.775	3.19	8.56e-05	0.00783	0.439	0.00141
cg00117018	8	145926791	F	NM_138367	chr8:145955639-145955989	8	3.05	1.97	1.37	1.89	0.00232	0.0485	0.172	0.0584
cg00117066	X	16050355	F	NM_005314		23	3.85	3.08	2.1	1.46	0.000117	0.00206	0.0359	0.143
cg00117237	8	67481358	F			8	1.99	0.818	1.38	1.29	0.0469	0.413	0.168	0.196
cg00117335	1	117007965	R	NM_001007237;NM_001542	chr1:117209824-117210621	1	2.16	2.05	0.0108	1.51	0.0309	0.0402	0.991	0.131
cg00117599	17	43317588	R			17	-1.38	-0.449	-1.31	-0.714	0.166	0.654	0.189	0.475
cg00117663	X	35726268	R	NM_001099921		23	4.69	2.55	2.7	2.88	2.78e-06	0.0107	0.00692	0.00392
cg00117825	1	56776605	F	NM_177414;NM_003713		1	3.54	1.82	2.7	1.71	0.000397	0.0686	0.00692	0.0868
cg00117869	10	126188983	F	NM_022126;NM_001167880		10	4.22	1.79	2.52	3.05	2.39e-05	0.0727	0.0118	0.00229
cg00117908	17	63767261	R	NM_014960	chr17:66255192-66255556	17	0.000572	-0.343	0.796	-0.346	1	0.732	0.426	0.73
cg00117914	22	48821324	F	NM_001080447		22	1.53	1.72	2.23	-1.16	0.127	0.085	0.0259	0.244
cg00117965	16	631445	F	NM_138418	chr16:691597-692700	16	-0.787	-0.746	-0.581	-0.0451	0.432	0.456	0.561	0.964
cg00118158	2	99995729	R	NM_001025108;NM_002285		2	4.11	2.36	2.27	2.49	3.99e-05	0.0182	0.0232	0.0129
cg00118199	7	51049110	R			7	2.34	2.42	0.656	0.871	0.0194	0.0157	0.512	0.384
cg00118317	21	33313899	F		chr21:34392162-34392656	21	1.74	1.25	1.23	0.563	0.0821	0.212	0.22	0.573
cg00118342	2	106143470	F	NM_025076		2	2.33	1.48	0.904	1.6	0.0198	0.138	0.366	0.11
cg00118365	5	140759296	F	NM_018917;NM_032099;NM_018919;NM_018912;NM_032088;NM_018918;NM_018922;NM_018925;NM_003736;NM_018916;NM_018915;NM_018920;NM_018923;NM_018924	chr5:140779013-140779659	5	0.722	1.04	-0.484	0.575	0.47	0.3	0.628	0.565
cg00118507	1	113017457	F	NM_001130079;NM_020963	chr1:113217475-113218097	1	-1.23	1.13	0.646	-3.81	0.217	0.259	0.519	0.00014
cg00118783	16	1009761	F		chr16:1069294-1070214	16	2.22	1	0.043	2.68	0.0263	0.317	0.966	0.00746
cg00118808	9	131137752	R		chr9:132099123-132099616	9	1.31	1.19	0.559	0.496	0.189	0.235	0.576	0.62
cg00118966	1	154823015	F	NM_001105669		1	3.39	2.83	1.24	1.7	0.000707	0.00464	0.216	0.0896
cg00118978	3	14572422	F		chr3:14597400-14597651	3	1.54	1.84	-0.28	0.946	0.123	0.0656	0.78	0.344
cg00118989	5	135729693	R	NM_001167577;NM_020389;NM_001167576		5	-1.35	-0.746	-0.247	-1.29	0.176	0.456	0.805	0.196
cg00119034	4	8673902	R		chr4:8626789-8627058	4	-2.28	-1.7	-1.34	-0.909	0.0226	0.0899	0.179	0.363
cg00119073	3	189353407	R	NM_001167672	chr3:187871478-187872354	3	0.733	0.515	0.689	0.0977	0.464	0.607	0.491	0.922
cg00119127	7	1389525	F		chr7:1423824-1424053	7	-1.16	-0.284	0.279	-1.9	0.246	0.777	0.78	0.0574
cg00119186	1	156936748	R	NM_001005279		1	3.02	2.9	0.99	1.22	0.00255	0.00377	0.322	0.221
cg00119197	4	103642006	F	NM_003998;NM_001165412	chr4:103422091-103423229	4	-1.24	-0.774	-0.667	-0.699	0.216	0.439	0.505	0.485
cg00119241	1	15025182	F	NM_201628;NM_015209		1	0.84	0.587	0.151	0.676	0.401	0.557	0.88	0.499
cg00119279	4	174663721	R		chr4:174427891-174428192	4	0.81	0.132	0.355	0.916	0.418	0.895	0.723	0.359
cg00119284	3	9879130	R		chr3:9904331-9904811	3	3.3	1.45	2.27	2.07	0.000962	0.148	0.0232	0.0381
cg00119314	17	45910609	F	NM_018346	chr17:48556004-48556509	17	2.95	2.09	1.57	1.43	0.00319	0.0371	0.116	0.151
cg00119364	3	139619642	F			3	2.61	2.1	1.1	1.26	0.00903	0.0353	0.272	0.207
cg00119387	5	156837122	R	NM_033274		5	4.51	3.56	1.89	2.26	6.53e-06	0.000376	0.0583	0.0238
cg00119460	6	31031722	R		chr6:30923208-30923624	6	-1.04	0.594	0.0968	-2.44	0.3	0.553	0.923	0.0146
cg00119670	6	127836900	R	NM_001012279	chr6:127796286-127797356	6	4.38	2.88	2.13	2.54	1.18e-05	0.00401	0.0331	0.0111
cg00119687	7	69890598	R	NM_015570;NM_001127231	chr7:70254894-70255986	7	0.158	1.1	1.04	-1.79	0.875	0.27	0.297	0.0738
cg00119778	6	32574425	F			6	-1.88	-0.845	-1.5	-0.984	0.0598	0.398	0.135	0.325
cg00119811	5	73128109	F	NM_001080479		5	-1.39	0	0.721	-2.97	0.166	1	0.471	0.00301
cg00119896	7	3050247	F	NM_032415		7	2.82	2.12	0.52	2.09	0.00487	0.0336	0.603	0.0368
cg00119986	17	35027983	F		chr17:37774076-37774591	17	-0.435	-0.528	0.366	-0.511	0.663	0.598	0.715	0.609
cg00120147	16	54084464	R	NM_001127891;NM_004530		16	2.41	2.57	1.53	0.0676	0.016	0.0103	0.127	0.946
cg00120172	X	76929195	R	NM_138270;NM_000489	chrX:77041003-77041725	23	2.43	1.41	1.39	1.42	0.015	0.158	0.165	0.156
cg00120274	10	44106551	R		chr10:44788811-44789120	10	0.476	0.251	1.55	-0.819	0.634	0.802	0.121	0.413
cg00120286	5	108812791	R			5	2.79	1.79	2.05	1.04	0.00531	0.0737	0.0399	0.296
cg00120332	6	88489669	F			6	-0.0204	-0.0792	0.0538	0	0.984	0.937	0.957	1
cg00120358	1	100388140	R	NM_144620;NM_019083		1	3.31	2.61	2.64	0.571	0.000917	0.00897	0.00839	0.568
cg00120416	8	49948070	F		chr8:49782687-49783270	8	4.68	2.69	3.01	2.45	2.94e-06	0.0071	0.00259	0.0143
cg00120464	4	147061641	F	NM_178835		4	3.5	2.3	1.76	1.96	0.000474	0.0213	0.0776	0.0499
cg00120473	4	7381517	F	NM_020777		4	-2.66	-0.66	-2.07	-1.98	0.00791	0.509	0.0389	0.0482
cg00120505	9	5645609	F	NM_020829;NM_001135920		9	0.272	-0.0198	0.398	0.128	0.786	0.984	0.691	0.898
cg00120783	17	1419623	F			17	2.96	1.39	1.05	2.61	0.00312	0.164	0.292	0.00895
cg00120825	1	2328598	F	NM_002617;NM_153818	chr1:2339876-2340246	1	-2	-0.403	-1.87	-1.31	0.0455	0.687	0.0612	0.191
cg00120932	6	30187415	R	NM_007028		6	3.27	2.75	0.863	1.91	0.00106	0.00594	0.388	0.0556
cg00120948	1	8407004	F	NM_012102;NM_001042682;NM_001042681	chr1:8483389-8484339	1	0.815	0.845	0.323	0.218	0.415	0.398	0.747	0.828
cg00121030	1	147415938	F		chr1:149149250-149149505	1	-2.78	-1.25	-0.818	-2.67	0.00539	0.21	0.414	0.00749
cg00121045	16	1356054	R	NM_023076	chr16:1414417-1414851	16	2	0.554	0.678	2.19	0.0459	0.579	0.498	0.0283
cg00121135	16	87518844	F	NM_175931;NM_005187	chr16:88994137-88994442	16	-2.15	0.0528	-2.27	-1.68	0.0314	0.958	0.0232	0.0924
cg00121255	6	114951525	F			6	0.0907	1.06	0.689	-1.55	0.928	0.288	0.491	0.122
cg00121339	16	11034538	F	NM_015226		16	1.41	0.732	0.667	1.03	0.159	0.464	0.505	0.303
cg00121366	20	61752626	F	NM_015894	chr20:62283516-62284835	20	0.658	0.521	-0.0861	0.646	0.511	0.602	0.931	0.518
cg00121389	8	17599582	R	NM_001001931;NM_020749;NM_001001925;NM_001166393;NM_001001924		8	-1.94	-0.957	-2.43	-0.135	0.0529	0.339	0.015	0.892
cg00121465	16	88556984	R	NM_207514	chr16:90030509-90030740	16	2.29	1.6	0.796	1.5	0.0223	0.11	0.426	0.133
cg00121533	1	74971705	F	NM_001130043;NM_001889;NM_001162916;NM_001134759;NM_138467;NM_001130042;NR_027962		1	-1.37	-0.343	-0.0968	-1.86	0.172	0.732	0.923	0.0625
cg00121551	20	57199792	R	NM_178457	chr20:57766396-57767896	20	1.12	0.97	1.15	-0.128	0.263	0.332	0.25	0.898
cg00121626	Y	20123684	R	NR_002923	chrY:21664481-21665063	24	0.976	0.707	1.27	-0.189	0.329	0.48	0.204	0.85
cg00121876	6	166171649	R			6	3.04	2.28	1.71	1.27	0.00236	0.0228	0.0871	0.204
cg00121884	20	3747732	R	NM_018347	chr20:3800761-3801546	20	2.94	1.59	0.57	2.8	0.00333	0.112	0.569	0.00508
cg00121904	X	43626770	F	NM_000898	chrX:43741299-43741827	23	-0.513	-0.851	0.237	-0.195	0.608	0.395	0.813	0.845
cg00122215	14	67156580	R	NM_001172	chr14:68086277-68086957	14	-2.41	-1.27	-1.99	-1.01	0.0158	0.205	0.0465	0.314
cg00122347	10	104226731	F	NM_024789		10	0.363	0.099	-0.258	0.736	0.717	0.921	0.796	0.462
cg00122406	8	26487653	F		chr8:26434372-26436785	8	1.38	1.68	-0.269	0.841	0.166	0.0937	0.788	0.4
cg00122628	8	134271541	R	NM_080838;NM_003882		8	-1.49	-0.897	0.871	-2.35	0.136	0.37	0.383	0.0187
cg00122659	1	178068250	R			1	3.75	2.61	1.84	2	0.000179	0.00897	0.0658	0.0457
cg00122679	10	125663018	F			10	0.317	1.04	-0.409	-0.18	0.751	0.297	0.683	0.857
cg00122683	6	160430335	R	NM_000876	chr6:160511936-160512465	6	3.98	2.55	1.07	3.15	6.77e-05	0.0109	0.287	0.00165
cg00122765	17	26482044	F	NM_001042492;NM_001128147;NM_000267		17	1.1	1.35	0.29	0.218	0.269	0.178	0.771	0.828
cg00122779	6	32140984	R	NM_019105		6	1.14	1.3	0.42	0.203	0.256	0.194	0.675	0.839
cg00122851	16	1353160	R	NM_032520	chr16:1414417-1414851	16	2.42	0.911	-0.194	3.31	0.0154	0.363	0.846	0.000924
cg00122854	2	218606736	R		chr2:218898490-218898835	2	-0.0769	-0.653	0.14	0.421	0.939	0.514	0.889	0.674
cg00122944	10	6267272	R	NM_001145443		10	-1.42	-0.132	-1.18	-1.22	0.155	0.895	0.237	0.224
cg00123001	X	13305801	F		chrX:13396888-13397494	23	-0.288	0.284	-0.721	-0.143	0.774	0.777	0.471	0.887
cg00123017	2	3674623	F		chr2:3698659-3698875	2	5.16	4	2.25	2.58	2.52e-07	6.37e-05	0.0245	0.00976
cg00123057	7	139799668	R	NM_013446		7	-3.41	-2.53	-1.98	-1.4	0.000639	0.0113	0.0477	0.162
cg00123072	5	79366015	F	NM_003248	chr5:79330928-79331488	5	5.05	3.33	3.02	2.4	4.51e-07	0.000861	0.0025	0.0162
cg00123090	1	232733710	F			1	-0.951	-0.145	-1.13	-0.458	0.342	0.885	0.259	0.647
cg00123104	1	9807319	R	NM_014944;NM_001009566	chr1:9883011-9884667	1	0.452	-0.884	-0.344	1.98	0.651	0.377	0.731	0.0482
cg00123128	4	3434500	R	NM_001164673;NM_173660	chr4:3464799-3465440	4	0.0133	1.21	0.387	-1.56	0.989	0.227	0.699	0.118
cg00123181	6	31940775	F	NM_025257	chr6:31830299-31830948	6	-2.19	-0.878	-2.1	-0.939	0.0285	0.38	0.0359	0.348
cg00123214	1	95476195	F	NM_001128142;NM_015485	chr1:95699725-95700142	1	0.393	0.957	-0.172	-0.173	0.694	0.339	0.863	0.863
cg00123317	12	68291310	R	NM_201550		12	3.34	2.32	1.69	1.74	0.000848	0.0203	0.0912	0.0814
cg00123478	4	10067263	F	NM_053042	chr4:10458129-10459353	4	-1.22	-1.19	-1.03	0.0826	0.222	0.232	0.302	0.934
cg00123652	7	5394173	R	NM_001080495	chr7:5427455-5429037	7	-1.19	1.02	-1.38	-1.85	0.235	0.31	0.169	0.0646
cg00123666	11	8240689	R	NM_002315	chr11:8284102-8285032	11	1.09	-0.257	1.44	0.834	0.275	0.797	0.149	0.404
cg00123762	6	41451675	R		chr6:41340667-41342543	6	3.44	2.01	1.35	2.52	0.000583	0.0442	0.176	0.0116
cg00124004	8	87596373	F	NM_003909	chr8:87526560-87527272	8	0.158	-0.587	-0.247	1.09	0.874	0.557	0.805	0.276
cg00124009	1	199706201	F	NM_012396	chr1:201437519-201438648	1	1.72	0.845	0.968	1.17	0.0857	0.398	0.333	0.241
cg00124095	3	72387772	F			3	-2.96	-1.12	-1.45	-2.55	0.00306	0.262	0.146	0.0106
cg00124133	15	87277440	F			15	-0.785	-0.343	-0.99	-0.0952	0.433	0.732	0.322	0.924
cg00124160	7	142190957	R		chr7:142494563-142495248	7	-1.11	-0.271	-1.17	-0.567	0.265	0.787	0.241	0.571
cg00124175	20	17898611	F	NM_152227;NM_052865;NM_014426	chr20:17948755-17949921	20	-0.118	-1.11	-0.925	1.76	0.906	0.268	0.355	0.0788
cg00124375	6	31806197	F	NM_013974	chr6:31695894-31698245	6	-1.33	-0.845	-0.871	-0.608	0.182	0.398	0.383	0.543
cg00124695	16	49742540	R	NM_001127892;NM_002968	chr16:51183699-51188763	16	-3.57	-1.89	-2.05	-2.26	0.000356	0.0591	0.0399	0.0238
cg00124708	X	100764119	F	NM_177947;NM_016607;NM_177948		23	0.0687	0.653	-1.38	0.654	0.945	0.514	0.168	0.513
cg00124902	1	34417696	F	NM_001134734;NM_032884	chr1:34642382-34643024	1	2.39	1.13	1	1.98	0.0168	0.259	0.317	0.0474
cg00124905	4	146759313	F	NM_172250	chr4:146540053-146540656	4	-2.96	-2.3	-1.4	-1.38	0.00307	0.0213	0.162	0.167
cg00124920	1	176782374	F	NR_033186;NM_207467	chr1:178511362-178512356	1	4.12	2.35	1.97	2.78	3.85e-05	0.0188	0.049	0.00545
cg00124993	5	135444311	F	NR_030583	chr5:135416204-135416475	5	2.41	0.297	1.88	2.1	0.0162	0.767	0.0603	0.0361
cg00125002	3	131230398	F			3	-3.51	-2.14	-1.83	-2.1	0.000443	0.0325	0.0674	0.0354
cg00125005	7	2494924	R			7	0.558	-0.0066	0.785	0.255	0.577	0.995	0.432	0.798
cg00125048	5	175956045	F	NM_052899	chr5:176023777-176024651	5	-0.411	0.0858	-0.699	-0.165	0.681	0.932	0.484	0.869
cg00125148	7	149377401	F		chr7:149744402-149746469	7	-2.49	-1.62	-1.05	-1.59	0.0129	0.106	0.292	0.111
cg00125306	17	75426437	R	NM_003655	chr17:77812016-77812276	17	1.24	0.224	-0.151	1.99	0.214	0.822	0.88	0.0465
cg00125455	20	44007678	R	NM_022104	chr20:44574821-44575022	20	2.62	2.03	0.0646	2.26	0.00889	0.0428	0.949	0.0238
cg00125544	2	236530670	R	NM_014914;NM_001037131	chr2:236867652-236867906	2	2.46	2.2	0.678	1.28	0.0138	0.0276	0.498	0.199
cg00125601	5	3363882	F			5	-2.56	-1.43	-1.7	-1.34	0.0105	0.152	0.0891	0.181
cg00125744	3	65983816	F	NM_015520;NM_001033057;NM_004742		3	3.35	2.31	2.61	0.969	0.000796	0.0209	0.00894	0.333
cg00125858	1	44341985	F		chr1:44568991-44569399	1	2.9	2.24	0.495	2.13	0.00375	0.0249	0.621	0.0329
cg00125893	15	69534741	F	NM_024817		15	-1.95	-1.45	0	-1.8	0.0506	0.147	1	0.0726
cg00126173	15	56941742	F		chr15:59157045-59157594	15	1.47	2.1	0.452	-0.0901	0.142	0.0359	0.651	0.928
cg00126261	6	100160729	R	NM_021620	chr6:100054686-100054988	6	-0.499	1.14	-0.0215	-2	0.618	0.254	0.983	0.0457
cg00126320	8	23640589	R		chr8:23584001-23584761	8	2.51	2.49	0.29	1.4	0.0121	0.0126	0.771	0.162
cg00126498	6	150328531	F	NM_025218	chr6:150284682-150286515	6	4.73	3	2.12	3	2.26e-06	0.00268	0.034	0.00266
cg00126536	6	30223302	R	NM_138700		6	2.54	1.7	1.36	1.34	0.0109	0.0899	0.175	0.179
cg00126638	6	29903562	R	NM_002127	chr6:29795553-29796594	6	0.17	-0.719	0.194	0.856	0.865	0.472	0.846	0.392
cg00126657	X	47852194	R	NR_028366		23	1.54	1.48	1.08	0.113	0.124	0.138	0.281	0.91
cg00126698	X	100527159	F	NM_000061		23	2.08	0.106	1.6	1.98	0.038	0.916	0.109	0.0482
cg00126887	4	1270066	F		chr4:1283250-1284331	4	-0.772	-0.112	0.301	-1.45	0.44	0.911	0.763	0.147
cg00126889	8	42222194	F			8	-1.96	-1.33	-0.742	-1.28	0.0498	0.183	0.458	0.202
cg00126995	5	54815931	R	NM_176895;NM_003711		5	2.8	1.86	1.91	1.13	0.00503	0.0628	0.0559	0.26
cg00127036	5	176381952	R	NM_012279	chr5:176449499-176450115	5	-3.9	-1.87	-1.34	-3.46	9.56e-05	0.0609	0.179	0.000549
cg00127070	8	119080854	F	NM_000127		8	2.19	1.75	0.796	1.18	0.0288	0.0804	0.426	0.238
cg00127150	22	21192144	R	NM_080764	chr22:22862623-22863220	22	0.917	1.37	-0.656	0.706	0.359	0.17	0.512	0.48
cg00127198	7	522044	F	NM_002607;NM_033023	chr7:556611-562845	7	2.91	3.12	0.99	0.819	0.00358	0.0018	0.322	0.413
cg00127353	6	112317662	F			6	-2.18	-1.38	-0.871	-1.49	0.0291	0.168	0.383	0.137
cg00127408	9	138540292	R	NM_017617	chr9:139421103-139421509	9	-0.67	-0.977	-0.344	0.18	0.503	0.329	0.731	0.857
cg00127487	22	27930139	R		chr22:29601547-29602291	22	0.403	0.699	-0.194	0.128	0.687	0.484	0.846	0.898
cg00127505	10	131653810	R		chr10:131761169-131771696	10	-3.12	-2.16	-2.14	-1.13	0.00183	0.0304	0.0323	0.257
cg00127781	3	50384886	R	NM_001005505;NM_006030		3	0.812	0.317	1.27	-0.0751	0.417	0.751	0.204	0.94
cg00127861	16	85508613	R			16	4	3.42	1.98	1.46	6.34e-05	0.000616	0.0477	0.143
cg00128054	3	101428184	R		chr3:99944104-99944332	3	0.491	0.277	-0.161	0.684	0.623	0.782	0.872	0.494
cg00128100	6	30764073	R	NM_001134870;NM_007243;NM_133471	chr6:30654392-30654934	6	4.56	3.32	2.03	2.47	5.09e-06	0.000903	0.042	0.0135
cg00128197	X	53478180	F	NM_001037811;NM_004493	chrX:53461178-53461463	23	-1.07	-0.449	-0.979	-0.473	0.286	0.654	0.328	0.636
cg00128273	21	45753511	F	NM_130444;NM_030582;NM_130445	chr21:46929225-46930211	21	-4.18	-2.36	-2.17	-2.7	2.89e-05	0.0182	0.0298	0.007
cg00128386	16	84223040	R	NM_001134473;NM_014615	chr16:85666621-85667149	16	0.252	-0.726	-0.785	1.86	0.801	0.468	0.432	0.0625
cg00128425	7	154298697	R	NM_001936;NM_130797;NM_001039350		7	3.85	1.48	2.54	2.73	0.000118	0.139	0.0111	0.0064
cg00128430	18	15185117	R		chr18:15197650-15198309	18	-4.53	-3.06	-1.79	-2.91	5.93e-06	0.00225	0.0741	0.00365
cg00128482	8	75900011	R	NM_015886		8	-0.314	-0.211	1.52	-1.65	0.754	0.833	0.129	0.0999
cg00128517	10	125241720	F			10	-1.75	0.125	-0.334	-2.79	0.0797	0.9	0.739	0.00532
cg00128560	16	3292014	F	NM_033208	chr16:3355020-3356012	16	4.17	2.28	2.69	2.31	3.02e-05	0.0228	0.00715	0.0207
cg00128654	14	89867816	F	NM_199043;NM_017970	chr14:90798164-90798394	14	-2.65	-0.389	-1.95	-2.35	0.00801	0.697	0.0515	0.0187
cg00128695	10	133358856	F		chr10:133508354-133508591	10	-1.99	-1.3	-0.527	-1.54	0.0471	0.194	0.598	0.124
cg00128702	18	895156	R	NM_001099733;NM_001117	chr18:904578-909574	18	-1.13	-0.218	-1.7	-0.188	0.257	0.828	0.0891	0.851
cg00128718	13	42150734	R			13	-0.333	-0.271	0.893	-1.07	0.739	0.787	0.372	0.286
cg00128766	1	46957803	F	NM_014774	chr1:47184402-47185083	1	-1.06	-0.145	0.979	-2.49	0.29	0.885	0.328	0.0126
cg00128774	4	184096055	R			4	3.29	2.08	1.7	1.91	0.000991	0.0377	0.0891	0.0564
cg00128805	15	38117993	F	NM_003134	chr15:40330991-40331563	15	-3.17	-1.72	-2.69	-1.2	0.00153	0.0862	0.00715	0.229
cg00128877	1	46842765	F	NM_198973;NR_024176;NR_024174;NM_003684;NM_001135553	chr1:47069615-47070179	1	1.4	1.26	0.334	0.759	0.163	0.208	0.739	0.448
cg00128951	1	88699758	F		chr1:88928283-88928760	1	3.91	1.87	2.54	2.43	9.24e-05	0.0618	0.0112	0.015
cg00129132	1	45728434	R	NM_007170	chr1:45956345-45956893	1	-2.86	-0.845	-1.58	-2.55	0.0043	0.398	0.114	0.0109
cg00129232	17	35067630	R	NM_001165937;NM_006804;NM_001165938		17	-0.094	0.35	-0.915	0.285	0.925	0.727	0.36	0.775
cg00129273	8	71069550	F			8	1.12	0.567	-0.366	1.62	0.263	0.57	0.715	0.105
cg00129524	7	64749888	F	NR_027392	chr7:65112260-65113234	7	-1.37	-1.26	-0.861	-0.248	0.171	0.207	0.389	0.804
cg00129549	16	83045089	F	NM_014861		16	1.47	1.12	-0.29	1.59	0.141	0.265	0.771	0.113
cg00129556	6	41856649	F	NM_006653;NM_013397	chr6:41748132-41748672	6	-0.582	0.172	-1.37	0.0451	0.561	0.864	0.172	0.964
cg00129563	5	122462752	F	NM_001136239	chr5:122433878-122435551	5	1.86	2.45	0.0323	0.578	0.0625	0.0141	0.974	0.563
cg00129651	17	35601236	F	NM_016339	chr17:38347533-38347765	17	2.36	1.21	1.3	1.58	0.0183	0.225	0.193	0.115
cg00129774	12	54646681	F	NM_001798;NM_006928;NM_052827	chr12:56360467-56360909	12	0.0253	0.106	-0.0753	0	0.98	0.916	0.94	1
cg00129785	21	46279881	F		chr21:47456271-47456530	21	1.38	0.739	0.925	0.744	0.168	0.46	0.355	0.457
cg00129811	6	116833091	R	NM_013352;NM_001080976		6	1.78	1.91	0.85	0.27	0.0758	0.0557	0.395	0.787
cg00129827	6	71451385	F	NM_001044305;NM_021940		6	-3.28	-1.39	-2.45	-1.94	0.00104	0.166	0.0142	0.0526
cg00130180	2	242274112	F	NM_001165031;NM_012145;NR_033255	chr2:242625961-242626720	2	0.501	0.468	0.71	-0.263	0.616	0.639	0.478	0.793
cg00130181	13	99315034	F	NM_206808		13	1.78	0.864	0.753	1.44	0.0753	0.387	0.451	0.149
cg00130223	16	32978052	F		chr16:33070214-33071314	16	1.3	0.172	0.947	1.19	0.192	0.864	0.344	0.235
cg00130342	17	69778212	R		chr17:72270301-72270512	17	0.716	0.205	-0.85	1.74	0.474	0.838	0.395	0.0814
cg00130498	X	129020393	F		chrX:129194007-129194703	23	1.1	0.468	-0.0968	1.45	0.273	0.639	0.923	0.147
cg00130528	2	174897285	R		chr2:175190866-175192123	2	0.0744	-0.0528	1.32	-0.984	0.941	0.958	0.186	0.325
cg00130530	6	35765180	R	NM_001145775;NM_001145777;NM_001145776;NM_004117	chr6:35655607-35656856	6	-0.365	0.0198	-0.732	0.00751	0.715	0.984	0.464	0.994
cg00130693	1	224177350	F	NM_013328	chr1:226111642-226112552	1	-1.43	-0.627	-1.18	-0.721	0.153	0.531	0.237	0.471
cg00130707	16	20210628	F			16	0.625	0.97	-0.409	0.413	0.532	0.332	0.683	0.679
cg00130710	6	40673903	R		chr6:40567266-40567580	6	2.57	2.69	1.24	0.473	0.01	0.0071	0.216	0.636
cg00130778	22	17336389	R		chr22:18957995-18958721	22	-0.332	-0.165	-0.904	0.406	0.74	0.869	0.366	0.685
cg00130808	15	34966201	R	NR_024264	chr15:37179516-37179782	15	1.74	0.963	1.07	1.01	0.081	0.335	0.287	0.313
cg00130817	3	70010870	F	NM_198177;NM_198178;NM_198159;NM_006722		3	1.88	2.49	0.355	0.285	0.0605	0.0129	0.723	0.775
cg00130819	16	83386330	R			16	-1.01	-0.6	-0.764	-0.413	0.312	0.548	0.445	0.679
cg00130947	6	129719060	R	NM_001079823;NM_000426		6	3.38	2.66	1.32	1.78	0.000736	0.00783	0.186	0.075
cg00131081	19	41712012	F	NM_001166036;NM_001166037;NM_001166038;NM_001012756	chr19:37018919-37019811	19	3.51	1.27	0.689	4	0.000451	0.205	0.491	6.43e-05
cg00131261	8	142356446	F			8	2.63	1.97	1.04	1.48	0.00854	0.0493	0.297	0.139
cg00131407	4	39158826	R	NR_026854	chr4:39481980-39482195	4	1.96	1.76	0.936	0.669	0.0495	0.0781	0.349	0.504
cg00131423	16	84055543	R			16	1.27	0.66	0.527	0.999	0.203	0.509	0.598	0.318
cg00131557	13	42494656	R	NM_013238	chr13:43597504-43597856	13	2.58	1.64	1.4	1.42	0.01	0.102	0.162	0.156
cg00131691	8	142364956	F		chr8:142295218-142295879	8	3.37	3.15	0.785	1.73	0.000761	0.00161	0.432	0.084
cg00131758	22	16655234	F	NM_015241	chr22:18275679-18275922	22	-0.201	0.211	-1.25	0.541	0.84	0.833	0.212	0.589
cg00131871	17	77273351	R	NM_004712	chr17:79662850-79663055	17	0.212	0.165	-0.624	0.736	0.832	0.869	0.533	0.462
cg00131893	8	1880363	F	NM_014629	chr8:1893696-1894083	8	1.43	1.83	0.14	0.398	0.153	0.0676	0.889	0.691
cg00131983	4	4918325	F		chr4:4867386-4867673	4	0.306	0.29	-0.882	0.996	0.76	0.772	0.378	0.319
cg00132008	8	8789758	F	NM_004225	chr8:8748652-8751478	8	3.97	2.48	3.37	1.16	7.23e-05	0.0131	0.000758	0.244
cg00132135	12	105679640	R	NM_213594;NM_032491		12	2.89	2.14	2.51	0.451	0.00391	0.0325	0.0122	0.652
cg00132141	10	69126313	R	NM_013266		10	2.13	0.818	1.29	1.61	0.0332	0.413	0.197	0.108
cg00132208	4	9729878	F		chr4:10117575-10118952	4	0.718	0.0594	0.613	0.608	0.473	0.953	0.54	0.543
cg00132255	1	212218699	R		chr1:214153214-214153668	1	-0.789	0.515	0.441	-2.25	0.43	0.607	0.659	0.0247
cg00132716	16	64292655	R			16	3.67	3.15	1.29	1.79	0.000246	0.00161	0.197	0.0738
cg00132769	5	17329333	R	NM_006317	chr5:17275369-17275638	5	2.64	1.59	2.21	0.864	0.00834	0.112	0.0274	0.388
cg00132782	10	115791008	R		chr10:115803358-115805468	10	2.23	1.44	1.17	1.23	0.0259	0.149	0.241	0.218
cg00132888	13	25497785	R			13	-0.764	-0.0594	-0.958	-0.383	0.445	0.953	0.338	0.702
cg00132972	2	219572390	R		chr2:219866131-219868054	2	2.54	1.42	2.56	0.563	0.0111	0.156	0.0104	0.573
cg00133136	20	62279427	F	NM_004535	chr20:62809870-62810371	20	1.18	1.21	1.57	-0.631	0.236	0.227	0.116	0.528
[truncated: 324,778 more rows]
