# Supplementary material for: Huntington's disease accelerates epigenetic aging of human brain and disrupts DNA methylation levels
Source: Aging (Albany NY). 2016 Jul 27;8(7):1485–504. doi: 10.18632/aging.101005 (PMC4993344; doi:10.18632/aging.101005)
Supplement: Supplementary file 3 [file aging-08-1485-s003.csv]

Name	CHR	MAPINFO	UCSCRefGeneName	Entrez	module	moduleColor	Z.ModMembership.in.M1	Z.ModMembership.in.M2	Z.ModMembership.in.M3	Z.ModMembership.in.M4	Z.ModMembership.in.M5	Z.ModMembership.in.M6	Z.ModMembership.in.M7	Z.ModMembership.in.M8	Z.ModMembership.in.M9	Z.ModMembership.in.M10	Z.ModMembership.in.M11	Z.ModMembership.in.M12	Z.ModMembership.in.M13	Z.ModMembership.in.M14	Z.ModMembership.in.M15	Z.ModMembership.in.M16	Z.ModMembership.in.M17	Z.ModMembership.in.M18	Z.ModMembership.in.M19	Z.ModMembership.in.M20	Z.ModMembership.in.M21	Z.ModMembership.in.M22	Z.ModMembership.in.M23	Z.ModMembership.in.M24	Z.ModMembership.in.M25	Z.ModMembership.in.M26	Z.ModMembership.in.M27	Z.ModMembership.in.M28	Z.ModMembership.in.M29	Z.ModMembership.in.M30	Z.ModMembership.in.M31	Z.ModMembership.in.M32	Z.ModMembership.in.M33	Z.ModMembership.in.M34	Z.ModMembership.in.M35	Z.ModMembership.in.M36	Z.ModMembership.in.M37	Z.ModMembership.in.M38	Z.ModMembership.in.M39	Z.ModMembership.in.M40	Z.ModMembership.in.M41	Z.ModMembership.in.M42	Z.ModMembership.in.M43
cg00001687	16	89761661	CDK10;CDK10;CDK10;CDK10;CDK10;CDK10	8558	5	green	3.29	-8.38	-14.9	-0.257	20.2	-1.32	14.8	2.75	2.05	7.76	-1.58	-0.979	10.1	-6.42	2.23	-5.68	0.872	-7.14	3.65	6.97	2.82	-0.683	1.34	0.657	-0.247	-2.31	0.362	-1.84	-2.31	-1.16	2.82	2.34	-1.61	0.879	0.812	-0.755	0.91	-6.72	0.299	1.73	-0.051	2.36	5.14
cg00003578	1	12600529		NA	3	brown	-0.454	17.7	22.1	8.06	-11.6	4.83	-6.76	0.788	-0.847	-7.18	4.18	-0.505	-1.94	7.96	-0.81	15.1	4.47	10.8	0.00803	-1.96	-1.05	2.04	-0.603	8.14	5.8	7.21	2.77	5.67	7.53	5.97	0.959	-1.08	3.26	1.53	-0.228	1.37	1.39	9.66	4.67	0.59	1.8	-1.25	-2.98
cg00004429	9	140681206	EHMT1	79813	2	blue	-1.26	26.9	13.1	17.1	-8.94	3.97	-5.21	0.899	-6.95	-14.7	3.5	-9.67	2.54	-0.109	-0.684	12.9	1.96	4.26	-0.298	-5.33	-0.862	2.66	-6.45	5.03	3.43	5.91	2.09	0.2	1.91	4.24	1.7	0.201	0.744	-0.51	-2.17	1.31	-0.0375	12.6	8.38	-0.114	-1.2	-7.05	-4.05
cg00004608	6	134272463		NA	10	purple	3.4	-8.39	-4.56	-4.14	13.9	3.14	10.4	4.65	8.69	17.6	0.369	9.42	6.94	5.4	3.58	-1.12	1.13	1.27	4.46	13.9	3.57	1.97	10.3	4.77	0.442	3.56	0.361	5.62	5.43	3.11	3.46	2.45	3.11	3.06	3.59	1.06	1.55	-6.34	-3	4.3	3.83	6.37	5.8
cg00004700	2	106013885	FHL2;FHL2;FHL2;FHL2	2274	5	green	1.76	-9.38	-12.7	-0.93	23.3	1.26	14.6	4.35	2.62	11.1	-0.771	1.81	11	-2.97	3.11	-4.2	-1.34	-6.08	3.52	11.1	3.4	1.84	4.02	0.5	-1.32	0.987	-0.598	0.387	0.558	-0.0894	3.28	4.26	-0.53	0.879	1.99	-0.436	0.0624	-6.34	-1.15	3.05	0.601	3.47	6.46
cg00005072	16	89371982	ANKRD11	29123	5	green	3.04	-5.92	-10	1.58	21.4	1.88	15.2	3.88	2.71	9.25	0.392	0.563	12.8	-2.68	2.3	-1.54	0.821	-4.55	4.11	11	2.78	1.9	3.07	4.38	0.706	2.17	1.15	1.85	1.57	2.08	4.85	2.5	-0.045	1.64	1.55	-0.911	0.939	-4.85	0.344	2.26	1.46	2.86	6.25
cg00005112	16	69958840	WWP2;WWP2	11060	10	purple	3.57	-12.2	-6.77	-7.79	14.9	1.3	10.6	5.17	10.2	22.5	-0.857	12.4	4.42	5.55	2.86	-3.69	1.21	0.375	4.78	13.8	4.51	0.466	12.6	4.67	-1.5	2.17	0.51	6.34	4.35	0.566	2.05	2.41	3.22	3.38	4.06	0.429	-0.33	-9.42	-4.67	3.38	3.97	7.42	4.4
cg00005164	19	35511522	GRAMD1A;GRAMD1A	57655	8	pink	9.03	1.86	0.827	1.56	3.71	-1.45	7.56	19.5	7.19	3.45	-6.15	2.44	3.37	2.62	1.68	1.5	2.22	5.71	16.1	2.73	13.9	-2.86	10.4	7.34	-5.88	2.25	4.78	5.63	2.34	-5.62	1.62	8.92	0.165	1.07	0.832	2.91	-6.4	-2.95	-0.695	0.756	0.365	0.162	-0.162
cg00005390	16	2569281	AMDHD2;ATP6V0C;AMDHD2	NA	5	green	1.22	-2.8	-6.59	4.87	18.4	4.7	11.8	4.73	0.273	7.64	2.93	-0.651	17	-1.61	3.82	1.76	0.038	-4.42	3.19	12	1.98	4.67	2.59	5.91	1.38	5.6	-0.393	2.27	3.08	4.03	5.68	4	2.22	2.38	3	0.875	1.74	-1.7	4.08	4.19	2.51	1.69	6.48
cg00005619	11	47608722	FAM180B	399888	5	green	1.53	-7.42	-12.2	1.26	22.4	1.41	14	4.37	0.831	9.03	-0.305	-0.248	13.3	-4.23	2.86	-3.07	0.0973	-7.16	3.05	10.1	3.23	0.931	2.66	1.21	-0.43	1.18	-0.678	-0.315	0.0184	0.143	2.08	3.62	-1.07	0.702	0.75	-0.673	0.684	-6.24	-0.187	2.84	-0.114	2.76	6.57
cg00007076	8	67342600	RRS1;RRS1	23212	10	purple	-0.481	-10.8	-6.58	-5.07	14.8	4.33	7.68	2.42	4.9	17.7	1.63	8.78	6.89	4.24	2.05	-2.47	-1.09	-2.51	0.613	14.7	1.47	2.81	8.09	1.79	-0.815	3.64	-1.61	4.42	4.26	3.06	1.52	1.59	1.72	1.06	2.55	0.261	0.282	-6.67	-3.17	3.48	2.4	7.18	6.7
cg00007221	1	43999020	PTPRF;PTPRF	5792	4	yellow	-3.45	14.2	7.42	18.8	-1.01	8.78	-1.34	1.49	-7.99	-7.42	6.49	-8.31	9.13	-0.293	2.7	13.7	0.394	-0.00634	-1.69	1.59	-1.75	6.12	-5.1	5.01	4.84	8.95	-1.78	0.0985	5.67	7.7	3.35	2.1	0.768	-0.0568	-0.579	1.4	1.12	10.6	8.22	3.49	0.0885	-5.58	0.0453
cg00008564	6	27830391		NA	2	blue	-0.735	26.1	14.7	15.3	-10.3	3.42	-5.4	0.112	-5.85	-14.7	3.02	-8.66	1.18	0.355	-0.915	13.1	1.83	5.82	-0.256	-5.78	-1.19	2.69	-6.42	4.33	3.45	4.8	2.63	-0.273	2.63	4.18	2.48	-0.201	0.568	-0.557	-2.04	0.719	0.0294	13.5	8.11	-0.424	-1.46	-6.74	-3.61
cg00008629	9	115093661	ROD1;ROD1;ROD1	NA	7	black	5.5	-11.3	-10.7	-5.45	17.7	-1.25	15.8	4.51	8.81	15	-3.87	6.57	5.72	0.199	2.14	-5.3	0.353	-1.4	6.07	11	5.73	-0.624	7.82	1.95	-2.12	-0.559	1.65	4.01	1.47	-0.888	2.91	2.28	1.08	2.26	3.37	-0.297	-0.089	-9.26	-2.63	1.58	2.75	6.8	6.35
cg00008971	1	45966925	MMACHC;CCDC163P	NA	2	blue	-1.34	25.9	13.9	15.8	-10.4	3.92	-5.73	-0.407	-6.89	-15.9	2.99	-9.56	1.39	-0.244	-0.273	12.7	1.46	4.8	-1.05	-5.92	-1.38	2.71	-7.27	3.73	3.25	4.87	1.64	0.0574	2.04	4.61	1.94	-0.759	0.368	-0.746	-2.35	-0.433	0.342	13	7.93	-0.339	-1.67	-6.98	-4.16
cg00009001	12	120151890	MIR1178;CIT	NA	7	black	8.71	-4.76	-9.05	0.496	14.1	-3.13	17.3	5.43	6.22	6.58	-5.92	0.0581	7.89	-3.98	3.35	-3.12	4.15	-1.31	7.89	5.74	8.13	-4.03	3.87	2.86	-0.677	-2.77	3.04	0.941	-0.494	-2.03	1.59	1.67	-1.18	1.96	0.292	-0.191	-0.665	-7.51	0.21	1.85	0.368	1.36	3.13
cg00009871	13	103532260	LOC121952	NA	7	black	2.53	-6.51	-9.13	0.721	20.9	2.51	14.6	5.46	3.43	11	0.017	2.1	12.3	-1.36	2.48	-1.49	-0.727	-3.9	4.63	12	3.86	2.86	4.99	3.12	-1.05	3.1	0.417	2.18	1.93	1.41	4.99	4.52	1.28	2.33	2.4	0.307	0.105	-4.86	1.03	2.94	2.09	3.01	7.18
cg00009944	21	48017232		NA	2	blue	-2.37	22.1	11.7	16.1	-8.34	4.48	-5.6	-0.568	-8.02	-13.9	4.9	-9.79	2.76	-0.496	1.39	11.8	1.78	3	-1.75	-5.32	-2.79	3.13	-7.53	4.53	4.66	5.37	-0.238	-0.628	1.23	5.07	2.07	-0.434	0.674	0.173	-2.21	0.713	2.31	12.5	8.03	1.61	-0.631	-6.35	-4.19
cg00010890	12	76406513		NA	8	pink	8.81	1.12	-1.13	1.76	5.08	-2.55	8.86	18.5	6.28	3.1	-6.64	1.26	3.96	0.767	0.452	0.544	1.28	4	16.4	2.63	13.5	-2.28	8.9	6.33	-6.1	1.66	5.42	4.08	1.06	-6.43	2.48	9.86	0.568	2.03	1.74	1.96	-5.12	-2.76	1.11	-0.903	1.34	-0.0805	0.777
cg00012529	12	132896897	GALNT9	50614	5	green	3.15	-7.72	-9.7	-1.15	17.1	0.117	12.2	3.22	3.59	10.3	-0.866	1.99	8.53	-2.36	3.81	-3.67	1.9	-4.15	3.63	8.56	2.93	-0.14	3.85	1.52	1.8	-0.683	-0.901	0.688	0.497	0.174	2.46	3.09	-0.924	1.93	-0.109	-1.14	1.63	-5.97	-0.773	3.24	0.509	3.11	4.58
cg00012698	15	34158767	AVEN	57099	2	blue	-0.398	21.3	10.9	17	-5.96	5.2	-2.9	0.633	-5.38	-11	3.67	-8.66	4.67	-0.0712	-0.824	12.6	1.94	4.79	-0.0746	-3.09	-0.706	3.33	-5.74	4.93	4.07	5.93	3.38	-0.0967	2.46	5.96	3.18	-0.321	0.398	-0.485	-1.81	0.784	0.826	11.2	8.4	-0.213	-1.14	-5.47	-2.57
cg00013441	12	123258908	CCDC62;CCDC62;CCDC62	84660	17	grey60	6.81	3	4.41	0.468	-2.29	-2.81	1.82	-0.606	5.38	0.139	-2.68	1.06	-2.27	2.04	2.15	2.59	18.5	6.81	2.29	-1.45	3.18	-11.2	1.38	5.69	8.57	-3.7	2.46	3.25	2.4	1.21	-6.66	-7.28	0.319	2.22	-1.75	-0.705	2.68	-4.63	-0.454	1.78	0.0871	1.78	-3.83
cg00014104	22	22220367	MAPK1;MAPK1	5594	5	green	1.81	-4.77	-9.81	3.1	18.9	2.48	12.6	3.66	0.7	7.86	0.626	-1.52	14.8	-4.11	4.11	-1.76	0.0141	-5.77	3.07	8.92	2.56	1.46	1.85	2.08	-0.275	1.8	-0.692	-0.687	-0.533	1.65	3.12	2.58	-0.642	-0.139	0.55	-0.557	1.07	-4.62	1.41	4.27	-0.652	1.97	5.29
cg00015121	14	24024633	THTPA;THTPA;THTPA	79178	13	salmon	-1.16	2.32	-2.16	10.2	11.3	7.24	7.35	3.55	-3.34	2.44	4.91	-4.16	18.9	-1.61	3.03	5.9	0.288	-3.76	0.75	9.65	0.608	5.3	-0.45	4.63	3.87	7.6	-0.844	0.872	4.09	6.17	4.15	3.64	-0.998	-0.316	-1.28	0.359	2.22	2.08	3.96	3.94	-0.75	-0.48	5.7
cg00015699	12	90313589		NA	8	pink	3.77	0.337	-1.38	1.21	4.38	-1.26	5.43	17.2	2.8	2.15	-3.35	0.751	3.03	0.289	-0.0327	0.0494	-3.15	1.36	12.4	2.33	8.37	1.5	7.02	2.8	-6.79	2.61	2.89	1.96	0.385	-7.49	3.78	17.2	-0.591	0.353	0.597	3.15	-6.66	0.925	-0.151	-0.415	0.386	-0.574	1.52
cg00017271	17	76220743	BIRC5;BIRC5;BIRC5;EPR1	332	4	yellow	-2.12	17.1	8.05	18.9	-3.43	5.64	-2.13	1.03	-7.9	-10.7	4.32	-10.6	6.63	-1.89	0.31	11.9	1.68	1.21	-0.89	-1.88	-0.842	3.52	-6.59	4.68	4.03	6.21	1.01	-1.04	2.54	5.46	2.33	0.68	0.732	0.112	-1.89	0.688	1.27	10.1	9.58	0.439	-0.822	-6.33	-2.8
cg00017362	8	19711803		NA	10	purple	0.293	-10.6	-8.7	-3.96	18.1	3.26	8.84	3.53	4.1	16.1	0.861	6.68	8.58	2.38	3.32	-3.97	-0.7	-3.91	1.38	12.3	2.54	1.95	7.54	1.88	-1.2	3.2	-1.86	2.79	2.13	1.87	0.836	2.17	2.28	2.15	3.34	1.16	0.0548	-8.01	-2.6	4.32	2.91	7.4	6.74
cg00018010	17	20105626	CYTSB;CYTSB;CYTSB;CYTSB	NA	2	blue	1.33	20.6	13.6	12	-9.77	2.24	-4.36	0.524	-2.8	-11.5	1.38	-6.17	0.0315	1.36	-1.15	11.5	2.28	8.02	1.26	-5.44	0.0892	1.86	-4.28	4.72	3.27	3.78	4.1	0.771	3.02	3.74	2.88	-0.372	1.02	-0.0329	-1.32	0.801	0.23	11.3	6.03	-0.202	-0.486	-5.11	-3.22
cg00018184	1	153519850	S100A3	6274	2	blue	-3.27	15.6	22.5	8.35	-10.6	7.22	-8.15	-0.787	-2.44	-6.19	6.43	-0.0556	-0.789	9.06	-0.876	17.1	2.59	8.78	-2.74	-0.267	-3.09	3.88	-1.23	6.83	5.63	9.33	1.29	4.96	9.16	8.13	0.64	-1.99	3.13	0.409	-0.395	0.688	1.21	10.2	3.75	1.32	1.09	-1.24	-2.33
cg00019678	12	110154229	C12orf34	NA	4	yellow	-1.89	14.1	6.7	17.6	-1.91	5.72	-0.989	1.37	-6.89	-8.79	4.42	-9.61	7.4	-1.69	0.292	11.3	0.353	0.791	-0.5	-0.456	-0.85	4.49	-5.52	4.6	3.22	6.8	1.11	-0.961	3.07	5.44	3.31	1.47	0.292	-0.566	-2.17	1.12	1.81	9.91	8.21	0.822	-1.38	-5.79	-1.46
cg00019877	9	115773738	LOC169834	NA	2	blue	-2.23	25.6	12.7	17.9	-8.88	4.48	-5.62	-0.313	-8.3	-15.6	4.11	-10.8	2.94	-0.841	-0.295	13.2	1.27	3.29	-1.62	-5.05	-1.91	3.22	-7.94	3.89	3.76	5.78	1.12	-0.889	2.18	4.92	1.78	-0.477	0.0679	-1.07	-2.54	0.706	0.498	13.2	8.42	0.117	-2.1	-6.38	-3.89
cg00020474	1	8214963		NA	2	blue	-0.287	25.2	15.2	13.5	-12	2.5	-6.56	-0.159	-5.36	-14.9	2.35	-8.28	-0.109	0.542	-0.635	11.8	3.04	6.22	-0.479	-7.11	-0.974	0.98	-6.04	4.32	3.67	3.76	2.39	0.473	1.81	3.58	0.83	-1.55	0.347	-0.431	-2.26	0.524	0.454	10.8	6.87	-0.381	-1.24	-6.73	-4.74
cg00020991	4	169930429	CBR4	84869	2	blue	-2.9	20.5	11.5	17	-6.59	6.36	-4.9	0.232	-7.85	-11.9	5.44	-8.87	4.42	0.276	0.307	13.1	0.259	2.69	-1.59	-2.82	-2.22	4.74	-6.39	4.12	3.89	7.43	0.7	0.245	2.79	6.36	2.62	0.548	0.806	-0.898	-1.97	0.858	0.539	12.9	8	1.1	-0.897	-5.14	-2.04
cg00021030	17	27225770	FLOT2;DHRS13	NA	2	blue	-2.75	19.5	11.5	16.6	-5.34	6.8	-4.21	1.47	-6.78	-9.78	5.52	-7.49	5.25	1.4	0.473	13.9	0.479	3.3	-0.998	-1.47	-1.43	5.59	-4.69	5.43	4.1	9.09	0.652	1.25	3.81	6.42	3.12	1.64	1.22	0.174	-1.36	0.715	1.44	13.1	7.7	1.2	-0.268	-4.42	-1.2
cg00021237	8	67525849	MYBL1;MYBL1	4603	17	grey60	10.2	1.33	1.98	-0.0883	-0.141	-5.04	4.43	2.65	7.28	1.77	-6.69	1.63	-0.9	1.23	2.69	0.827	17.3	5.96	5.24	-0.91	7.61	-13.9	3.9	5.63	4.55	-4.64	3.43	3.34	1.15	-2.04	-7.67	-5.22	0.959	2.41	-0.498	-0.684	1.15	-7.64	0.0761	1.87	0.424	0.842	-2.84
cg00021256	2	219848373	FEV	54738	3	brown	-0.99	12.2	18.7	5.44	-10.7	5.19	-6.91	1.24	-0.239	-4.88	3.24	1.32	-2.35	9.04	-0.905	12.6	3.34	9.79	-0.653	-1.22	-0.188	1.58	1.09	5.66	3.54	6.92	1.92	5.51	7.66	5	-1.09	-1.19	4.28	1.64	1.07	1.95	0.26	6.88	3.09	0.332	2.2	-0.566	-2.74
cg00022262	12	132959564		NA	2	blue	-0.322	22.3	12.7	15.7	-7.63	5	-3.87	1.04	-5.06	-12	3.57	-7.8	3.13	0.885	-0.652	13.3	1.59	5.57	0.266	-3.59	-0.734	3.35	-5.32	5.28	3.4	6.29	3.04	0.927	3.31	5.54	2.98	0.00458	2.1	1.22	-0.0164	0.549	0.918	11.4	8.77	-0.726	0.691	-5.24	-2.78
cg00022866	11	64108440	CCDC88B	283234	2	blue	-0.344	19	16.6	10.5	-9.78	3.57	-6.1	0.746	-3.11	-9	3.42	-3.65	0.0412	4.53	-1.03	13.8	3.4	8.08	-0.0986	-3.15	-0.866	2.04	-2.38	7.42	4.02	6.33	2.63	3.59	5.47	4.59	1.3	-1.2	2.43	0.508	-0.183	1.85	1.09	10.4	6.54	-0.861	1.04	-3.58	-3.61
cg00023001	17	55938748		NA	10	purple	3.62	-13.9	-6.78	-8.87	14.6	0.579	10.1	4.62	10.6	24	-1.5	12.8	3.76	5.35	3.02	-4.33	1.55	0.353	4.43	13.4	4.44	-0.605	12.7	2.59	-0.642	0.654	-0.484	5.84	4.66	0.0138	0.721	2.34	2.42	3.23	3.86	0.253	-0.456	-10.7	-5.28	3.69	3.89	8.52	6.04
cg00023464	13	111267667	CARKD	55739	5	green	-0.0947	-8.77	-8.72	-1.76	17.8	4	9.83	3.47	2.74	13.3	1.89	4.55	10.3	0.784	3.82	-2.59	-0.95	-4.81	1.54	12.6	1.87	3.46	5.92	2.67	0.014	3.91	-2.34	2.92	1.98	2.86	2.84	3.01	2.41	4.09	3.31	2.12	0.712	-5.91	-0.534	5.11	3.32	4.98	7.44
cg00023919	11	66839191	RHOD	29984	2	blue	-0.0924	21.8	13.9	13.6	-9.83	2.75	-5.29	0.651	-4.87	-12.4	2.87	-7.32	0.928	1.11	-0.623	12.6	3.76	5.53	0.0674	-5.59	-0.527	1.07	-4.7	5.98	3.95	4.7	2.54	1.31	2.66	3.63	0.901	-0.875	2.61	1.05	0.134	1.69	1.06	10.4	9.32	-0.198	1.03	-6.09	-3.08
cg00024443	16	21569473		NA	2	blue	-4.3	16	17.1	9.19	-10.6	6.31	-8.5	-0.367	-4.96	-9.09	5.63	-2.76	-0.571	5.58	-1.58	14	0.82	6.09	-2.96	-2.18	-2.99	4.35	-3.12	4.12	4.14	8.22	0.596	2.92	6.03	5.77	0.475	-0.219	1.88	-0.77	-1.6	0.762	1.4	12.3	4.02	0.197	-0.744	-2.8	-2.54
cg00024516	4	123506194		NA	2	blue	-1.43	18.8	9.44	17.1	-5.86	4.44	-3.03	0.349	-7.18	-12.9	3.82	-10.5	4.05	-1.92	-0.342	11.8	0.435	2.7	-0.405	-3.62	-1.62	4.09	-7.4	3.49	3.73	4.8	1.76	-0.867	2.38	4.57	3.89	1.27	0.802	-0.199	-1.61	0.51	0.795	13.1	9.92	-0.242	-0.569	-6.83	-2.21
cg00024989	19	17902242		NA	2	blue	-4.17	20.4	13.4	16.1	-7.96	6.51	-6.2	0.425	-8.69	-12.4	5.8	-8.44	3.38	1.07	-0.492	15.1	0.103	2.51	-2.32	-2.57	-2.64	4.95	-6.27	4.05	3.82	8.31	0.137	0.813	4.59	5.52	1.64	1.01	0.323	-1.44	-2.1	0.209	0.476	13.6	7.01	0.566	-1.57	-6	-2.02
cg00025591	21	48026043	S100B	6285	2	blue	-1.82	25.2	14.2	14.1	-11.5	3.6	-7.28	-0.216	-7.06	-15.4	3.2	-8.95	0.563	0.25	-0.402	12.2	1.67	4.41	-1.45	-6.4	-1.49	2	-6.65	3.58	3.47	4.78	1.09	0.331	1.71	3.87	0.534	-0.7	-0.0471	-0.792	-2.61	0.0894	0.176	12.1	6.81	-0.274	-1.32	-6.39	-4.12
cg00026412	10	62059894	ANK3	288	4	yellow	-3.52	20	11.9	18.2	-5.95	7.07	-3.72	0.0296	-8.04	-12	6.15	-9.01	4.55	-0.0311	-0.938	15.7	0.663	2.48	-2	-1.67	-3	5.36	-7.16	3.88	5.24	7.36	1.4	-0.382	5.12	6.58	3.25	1.25	0.841	-0.199	-1.4	0.692	1.26	14.2	8.54	1.25	-0.56	-6.54	-0.988
cg00026974	17	42298151	UBTF;UBTF;UBTF	7343	17	grey60	8.14	2.85	4.02	0.465	-2.32	-3.24	2.29	-0.659	6.28	0.302	-4.3	1.42	-1.81	2.3	3.25	2.01	19.2	7.19	2.53	-1.81	4.73	-13	1.94	6.27	5.8	-3.97	2.47	2.94	1.84	1.16	-7.95	-9.79	0.628	2.02	-1.3	-1.99	1.8	-6.39	-0.583	2.46	-0.465	1.38	-5.01
cg00027669	17	37382699	STAC2	342667	3	brown	-3.56	20.6	17.2	11.3	-12.3	5.46	-9.22	-0.719	-6.24	-12.1	4.61	-5.22	-0.232	3.55	-0.94	13.9	0.826	5.32	-3	-4.24	-2.44	3.64	-4.72	4.02	3.35	7.41	0.566	1.33	3.65	5.38	0.342	-0.918	2.32	-0.397	-0.475	1.66	0.633	12.5	6.65	-0.496	0.0454	-4.39	-3.96
cg00027674	11	87908897	RAB38	23682	3	brown	-1.37	15.4	22.7	6.87	-13	4.97	-7.89	-0.24	-0.974	-7.12	3.99	-0.0637	-3.05	7.88	-0.422	14.5	2.75	10.2	-1.13	-2.26	-1.84	2.72	-0.917	5.4	4.79	6.41	1.74	4.29	7.69	5.69	0.934	-1.01	3.89	1.86	0.456	1.95	0.448	10.3	4.47	0.602	2.34	-2.42	-3.13
cg00028013	15	74218697	LOXL1	4016	3	brown	1.35	16.6	21.4	6.72	-13.5	2.76	-7.6	0.962	0.122	-7.39	1.33	-0.386	-3.26	7.28	-0.328	12.7	5.4	11.5	0.483	-4.24	0.952	-0.804	0.0315	6.9	3.58	4.96	2.68	4.31	5.32	3.98	-1.64	-2.64	2.98	1.45	-0.42	1.74	0.244	6.68	3.63	0.121	1.28	-1.66	-4.86
cg00028135	3	114343673	ZBTB20;ZBTB20;ZBTB20;ZBTB20;ZBTB20;ZBTB20	26137	3	brown	-2.64	15.1	24.3	5.7	-15.3	5.16	-10.7	-1.19	-1.69	-7.66	4.38	0.393	-4.29	8.62	-1.25	13.2	2.29	9.88	-2.6	-3.22	-2.46	2.65	-1.05	4.64	4.11	6.86	1	4.55	6.67	5.98	-0.469	-2.24	4.37	1.61	0.718	1.26	1.27	9.44	3.74	0.225	2.27	-1.93	-3.68
cg00028318	6	29570739	GABBR1;GABBR1;GABBR1	2550	5	green	3.1	-11.2	-14.4	-3.85	18.6	-1.37	12.1	2.39	3.72	11.4	-1.29	2.45	7.19	-3.59	2.42	-7.63	0.878	-5.83	3.39	7.13	2.35	-0.857	3.47	0.379	-0.351	-2.36	-0.265	-0.273	-2.22	-1.22	1.88	2.17	-0.299	1.4	1.58	-0.923	0.91	-8.24	-1.81	2.35	0.784	4	4.38
cg00028429	15	101273479		NA	3	brown	-2.08	19	18.9	8.92	-13.8	4.18	-8.52	-0.0959	-3.64	-10.9	3.69	-3.43	-2.28	4.62	-1.23	13.2	2.25	7.85	-1.43	-4.58	-1.66	2.4	-3.26	4.56	3.74	5.98	1.54	3.04	4.5	4.41	0.334	-0.797	2.78	1.21	-0.197	1.21	0.837	11.1	5.64	-1.09	1.02	-4.22	-4.55
cg00028935	3	147114406	ZIC4;ZIC4;ZIC4	84107	42	lightcyan1	2.91	-6.34	-2.73	-7.74	2.8	-2.12	2.6	-0.0928	6.89	7.34	-2.54	6.74	-2.21	3.23	0.522	-5.36	1.6	2.61	1.88	2.48	1.82	-2.25	4.88	0.179	-0.0105	-2.2	0.593	3.47	-0.776	-0.576	-0.706	-1.61	1.36	2.4	2	-0.914	2.21	-6.29	-3.8	0.44	2.74	23.7	3.23
cg00029246	7	137223417	DGKI	9162	7	black	3.28	-11.5	-9.45	-5.36	17.6	1.08	13.5	4.31	7.56	16.3	-1.37	7.57	6.24	1.49	2.71	-4.01	-0.825	-1.91	4.56	13.1	4	1.69	8.47	1.94	-1.2	1.1	-0.0768	4.07	3.11	0.533	3.79	3.77	1.39	2.91	3.65	0.163	0.238	-7.28	-3	2.89	3.44	6.67	7.51
cg00029640	19	35770141	USF2;USF2	7392	5	green	3.69	-6.78	-10.3	-0.268	19.9	0.933	13.4	5.37	3.76	10.4	-0.977	1.63	10.9	-2.08	2.94	-3.54	1.26	-3.67	5.13	9.33	4.4	0.45	4.62	4.05	-0.542	1.7	1.01	2.24	-0.0587	0.528	2.92	3.02	0.592	1.77	1.94	0.05	0.949	-6.94	-0.0522	2.69	0.765	4.24	4.95
cg00029922	2	192030587		NA	2	blue	-0.489	24.5	14.9	12.7	-11.9	3.12	-6.24	0.0242	-4.83	-14.5	2.36	-7.44	-0.4	0.979	-1.2	12	0.749	6.87	0.0159	-6.37	-0.971	2.99	-5.72	3.62	2.63	4.66	2.79	0.356	1.87	3.93	2.76	-0.0537	0.888	-0.289	-1.59	1.26	-0.0826	13.7	7.04	-0.998	-0.491	-5.58	-3.63
cg00030774	15	29432143	FAM189A1	23359	3	brown	1.74	15.3	21	7.63	-9.84	3.66	-4.55	1.36	1.37	-5.27	1.72	0.475	-1.43	8.28	0.787	15.2	6.88	11.8	0.853	-1.03	1.45	-0.559	1.07	8.29	5.3	5.94	2.38	5.66	8.44	5.31	-1.25	-2.68	3.95	2.46	0.784	1.52	1.81	6.14	4.38	1.74	2.25	-2.11	-2.4
cg00031162	17	7453377	TNFSF12;TNFSF12-TNFSF13	NA	5	green	2.97	-12.1	-10.7	-5.02	19	0.255	12.4	4.75	6.11	16.4	-1.67	6.32	7.26	0.701	2.82	-5.31	-0.0954	-3.33	4.1	11.3	4.3	0.0302	8.25	1.67	-2.23	0.633	-0.236	2.68	1.75	-0.836	1.42	2.86	1.72	2.91	2.73	0.571	-0.209	-9.43	-2.42	2.26	2.29	5.63	5.59
cg00032701	19	7911195	EVI5L;EVI5L	115704	2	blue	-2.03	25.9	14.4	16.8	-9.27	5.25	-5.78	0.263	-7.16	-13.9	4.82	-8.59	2.5	0.78	-0.587	14.3	2	4.28	-1.18	-4.54	-1.99	3.62	-6.43	5.11	4.55	6.36	1.59	0.542	3.06	5.44	2.32	0.242	1.65	0.327	-1.25	0.671	1.22	13.8	9.25	0.0595	-0.204	-6.38	-3.31
cg00033334	12	123877320	SETD8	387893	7	black	5.81	-5.44	-8.9	0.479	17.1	-0.288	16.4	6.68	5.11	8.93	-3.81	1.61	10.2	-1.73	1.69	-2.3	0.968	-2.18	6.92	9.06	7.44	-0.425	5.76	4.02	-3.19	1.43	2.84	3.1	1.2	-0.6	2.87	2.72	0.155	1.44	1.57	-0.461	-0.353	-6.85	-0.105	1.08	0.439	2.46	5.61
cg00036408	17	79316841		NA	10	purple	0.98	-16.8	-9.8	-9.95	14	1.01	7.31	1.35	7.11	20.4	-0.434	10.5	3.28	3.15	1.98	-7.24	-1.32	-2.85	1.12	10.7	1.55	0.891	8.78	-0.369	-1.65	-0.147	-1.53	3	1.17	0.428	0.983	1.02	1.35	2.03	2.73	-0.0487	0.176	-9.81	-5.97	2.57	2.96	8.91	6.37
cg00036976	16	85343281		NA	2	blue	-0.0777	27.1	14.2	16.3	-9.14	3.37	-4.61	1.02	-5.7	-13.7	2.91	-8.88	2.09	0.312	-0.271	13.4	4.22	5.43	0.211	-5.34	-0.174	1.38	-5.67	6.34	4.69	5.04	2.66	1.4	2.65	4.21	1.41	-0.55	0.967	0.528	-2.05	0.551	0.981	11.1	8.56	0.281	-1.01	-6.52	-4.13
cg00037013	2	219722536		NA	3	brown	-0.62	11.4	23.5	3.39	-12.3	4.26	-8.07	0.842	1.29	-3.91	2.68	3.93	-4.61	12.2	-1.21	13.3	4.1	12.3	-0.755	-0.614	-0.00436	0.872	2.52	6.75	3.3	7.05	1.87	7.25	10.6	4.68	-1.92	-2.08	4.53	1.95	1.57	0.941	0.018	6.45	1.89	-0.117	3.03	0.612	-2.69
cg00037314	19	14274039	LPHN1;LPHN1	22859	5	green	2.49	-8.62	-14.1	-0.542	20	-0.663	14.2	3.03	1.74	8.03	-1.25	-0.578	9.52	-5.94	2.47	-5.57	-0.361	-7.11	3.64	7.23	2.55	0.818	1.59	-0.356	0.0588	-1.89	-0.285	-1.64	-1.8	-1.12	3.94	4.38	-1.14	1.98	0.905	-0.718	0.21	-5.45	0.226	2.09	0.67	1.93	5.01
cg00037763	18	42281763	SETBP1;SETBP1	26040	5	green	2.23	-5.45	-9.7	1.65	18	1.55	13.8	4.49	2.09	7.64	-0.518	0.17	11.4	-3.16	3.4	-1.88	-0.592	-5.08	4.16	9.32	3.36	1.99	2.97	2.08	-0.633	1.79	-0.136	0.961	0.455	0.74	4.23	3.82	-0.0232	1.4	1.58	0.0993	-0.109	-4.37	0.698	3.32	0.856	0.388	5.06
cg00037952	10	104535276	C10orf26;C10orf26	NA	10	purple	1.28	-10.2	-4.22	-6.4	11.3	2.86	7.09	4.12	7.36	18.3	0.181	11.4	4.5	6.4	3.29	-1.77	1.22	-0.435	2.07	13.3	3.61	0.48	11.8	3.12	-0.702	3.34	-1.55	6.16	5.77	1.5	-0.68	1.61	2.77	2.73	3.95	1.47	-0.711	-8.6	-4.68	4.5	3.19	6.24	5.63
cg00039147	17	35194628		NA	3	brown	-1.46	14.1	19.7	6.71	-10.4	4.69	-7.29	4.09	-1.31	-5.95	3.55	0.483	-1.86	8.79	-1.42	14.1	2.14	9.34	1.02	-1.09	0.555	2.42	1.62	7.23	1.82	8.9	1.9	5.96	8.28	2.99	-0.486	1.9	2.94	-0.0792	0.183	2.15	-1.17	8.47	2.82	-0.153	1.38	-1.83	-2.06
cg00041641	1	151024614	CDC42SE1;CDC42SE1	56882	8	pink	6.43	0.773	-0.202	4.1	8.6	1.74	10.6	17.3	5.51	5.9	-2.55	2.12	8.87	2.55	2.66	4.05	2.95	3.08	12.4	7.84	10.4	-0.14	9.09	8.03	-1.92	4.85	3.87	5.31	5.58	-2.07	2.97	9.37	0.984	2.76	1.41	1.78	-3.65	-2.78	0.702	2.94	1.14	0.375	3.21
cg00042263	2	118503396		NA	3	brown	1.4	19.3	14.9	11	-8.46	3.38	-3.53	1.81	-1.49	-9.13	2.25	-3.99	0.512	3.63	-0.478	13.2	2.45	9.47	2.06	-2.93	0.58	2.88	-2.39	6.43	3.17	5.96	3.57	3.45	4.93	4.56	3.34	0.553	2.19	1.11	-1.56	1.04	0.362	11.8	5.87	-0.409	-0.11	-3.94	-2.7
cg00042837	17	37028650	LASP1	3927	10	purple	1.83	-13.7	-8.07	-7.46	14.9	1.74	9.03	3.84	7.3	20.1	-0.473	9.76	4.93	3.49	2.76	-4.82	0.178	-2.19	2.63	12.4	3.19	0.395	10.2	1.05	-1.12	1.06	-1.16	3.81	3.47	0.278	0.46	2.41	1.46	1.97	3.25	0.792	-0.561	-9.86	-5.15	3.8	2.66	7.31	6.66
cg00043444	6	134384706		NA	3	brown	0.579	19.6	14.1	11.4	-9.54	3.93	-4.71	0.912	-2.63	-10.3	2.38	-4.79	0.42	2.57	-0.14	12.1	1.83	8.09	0.988	-4.32	-0.0645	2.37	-3.48	4.59	3.29	5	2.94	0.757	3.35	4.88	2.43	-0.095	2.05	-0.152	0.5	2.56	0.329	10.8	6.44	0.743	0.651	-4.41	-3.33
cg00043800	2	74612144	LOC100189589	NA	2	blue	-2.69	25	12.8	18.4	-8.14	5.46	-5.4	1.09	-8.51	-14.5	4.46	-10.3	3.63	-0.421	-0.447	13.7	-0.0446	2.76	-0.985	-4.23	-1.52	4.3	-6.83	3.77	2.65	7.02	1.22	-0.434	2.53	4.67	2.39	1.37	0.125	-1.03	-2.14	0.696	-0.131	13.5	8.22	-0.0268	-1.7	-6.95	-3.33
cg00044372	16	85070825	KIAA0513	9764	5	green	1.11	-7.92	-12.2	0.72	23.2	2.08	13.8	3.08	1.46	9.64	0.828	0.404	12.6	-3.62	2.27	-3.2	-1.13	-6.66	2.63	10.9	1.88	2.62	2.48	1.39	-0.42	1.65	-0.589	0.514	0.236	1.42	3.94	3.43	0.764	2.54	1.79	-0.308	1.73	-5.04	0.837	2.63	1.04	2.76	6.46
cg00044505	8	48649086		NA	10	purple	0.654	-10.4	-4.34	-7.65	9.83	3.06	5.15	3.24	7.01	17.7	0.314	11.5	3.53	6.46	2.66	-3.43	-0.558	-0.0997	1.51	11.3	2.52	1.32	10.5	1.6	-1.54	2.8	-1.38	5.84	3.33	1.53	0.155	1.58	3.21	2.76	3.68	-0.225	-0.292	-7.97	-4.48	3.36	3.63	9.17	6.33
cg00044665	16	66400411	CDH5	1003	3	brown	1.35	15.6	17.8	7.93	-9.76	3.18	-5.08	1.51	-0.0477	-6.28	2.36	-1.11	-0.988	6.64	-0.344	12.6	5.68	10.1	0.974	-2.59	0.579	0.00408	-0.2	7.79	4.64	5.29	3.21	4.49	6.05	4.44	-0.171	-1.71	2.87	1.03	-0.182	0.95	1.94	6.9	4.42	0.858	1.55	-2.53	-3.2
cg00045902	10	134222218	PWWP2B;PWWP2B	170394	5	green	3.03	-10	-8.88	-3.42	18.9	1.19	12.8	4.9	5.94	15.4	-0.873	5.66	8.34	1.15	3.23	-3.34	1.2	-2.84	4.11	12.6	4.49	0.383	8.22	3.72	-0.742	1.83	-0.025	4.91	2.88	0.635	1.9	2.57	0.485	2.48	1.63	-0.63	0.709	-8.79	-2.88	2.93	1.76	5.47	5.84
cg00047683	16	72034122	PKD1L3	342372	3	brown	0.61	20.9	16.8	10.3	-12.1	3.02	-6.19	-0.582	-2.3	-11.4	1.69	-4.6	-1.48	3.2	-1.43	12.7	2.24	9.2	-0.0505	-5.11	-0.346	1.74	-3.71	4.71	3.28	4.53	3.65	1.9	3.4	4.83	1.82	-2.04	1.76	0.282	-1.36	0.326	0.413	11.3	5.74	-0.942	-0.0165	-4.34	-3.69
cg00048370	6	164506939		NA	2	blue	0.256	22.4	13.5	14.6	-9.02	3.27	-4.31	0.666	-4.86	-12.9	1.85	-8.06	1.56	0.296	-0.581	12.6	3.26	5.69	0.0929	-4.94	0.302	0.871	-5.44	4.49	3.31	4.16	2.72	0.539	2.93	3.87	0.678	-0.954	0.249	-0.546	-2.16	-0.133	0.341	10.3	7.2	-0.246	-1.53	-6.13	-4.33
cg00049156	1	93643903	TMED5;TMED5;TMED5	50999	4	yellow	-2.81	20.6	11	17.3	-6.7	5.64	-4.38	-0.736	-8.27	-13	5.06	-9.8	4.05	-0.632	-0.601	12.7	0.264	2.77	-1.91	-3.43	-2.67	4.89	-7.87	3.6	4.29	6.29	1.44	-0.313	2.71	6.11	3.36	0.193	0.455	-0.278	-2.71	0.122	1.16	14	8.35	0.0284	-1.57	-5.26	-2.67
cg00049382	13	34250985		NA	3	brown	-0.908	13.2	20.8	5.51	-11.8	5.49	-7.57	0.687	-0.113	-5.39	3.26	1.19	-3.07	8.89	0.485	12.8	3.94	10.5	-0.826	-1.46	-0.35	0.739	0.817	5.2	4.59	6.23	0.516	5.75	7.49	5.31	-1.82	-1.61	3.16	1.94	0.282	1.86	0.797	6.85	2.19	1.3	2.32	-0.771	-3.54
cg00049440	9	73026643	KLF9	687	5	green	0.397	-14	-7.48	-8	13.3	1.65	7.38	2.35	6.24	18	0.24	9.99	3.75	3.61	2.54	-3.99	-0.497	-2.83	1.12	12.6	1.82	0.581	9.15	0.726	-1.09	1.22	-2.37	3.38	3.92	0.436	-0.202	1.53	1.56	1.97	2.91	1.49	0.0957	-8.83	-5.07	3.19	3	6.9	5.75
cg00049883	16	5554273		NA	5	green	3.67	-7.76	-2.42	-4.94	11.2	2.67	8.7	5.13	9.59	18.4	-0.478	11.5	5.09	7.31	3.53	-0.21	3.93	2.48	4.12	13.3	4.93	-0.375	12.6	5.32	1.33	3.08	0.43	7.32	7.13	2.25	0.181	1.79	3.78	4.3	4.16	0.834	0.25	-7.87	-3.39	4.42	4.65	6.62	4.82
cg00050294	1	2886818		NA	2	blue	0.65	17.9	11.2	12.8	-6.19	3.56	-2.34	1.03	-3.43	-8.99	2.77	-6.01	2.9	1.57	0.474	11.9	3.87	5.94	0.884	-2.6	-0.0493	1.69	-3.85	7.14	4.71	5.45	2.64	2.49	3.73	4.88	2.25	-0.892	0.0702	-1.06	-1.87	0.793	0.43	9.15	6.19	0.453	-0.776	-4.94	-3.84
cg00050496	12	110211701	MGC14436;MGC14436	NA	2	blue	1.9	18	9.14	14.4	-5.63	2.74	-1.3	1.13	-3.82	-11	1.25	-8.73	3.36	-1.38	0.789	10.1	4.03	4.74	1.62	-4.23	1.01	0.17	-5.34	4.86	4.07	3.04	2.74	0.0149	1.42	3.89	1.62	-0.682	-0.375	-0.187	-2.39	0.164	1.28	8.33	7.35	0.243	-1.74	-5	-3.67
cg00050938	3	50296100	GNAI2;GNAI2	2771	2	blue	1.63	19.9	11	13.8	-7.24	2.12	-2.93	4.89	-3.63	-11.2	0.533	-7.43	2.09	0.0741	0.142	10.7	1.49	5.68	3.74	-4.84	2.63	1.38	-2.88	5.31	0.418	4.32	2.82	0.237	2.03	0.85	2.48	3.21	0.0294	-0.545	-1.52	1.5	-1.18	9.86	6.64	-0.333	-0.738	-6.38	-4.13
cg00052772	6	33245804	B3GALT4	8705	10	purple	2.27	-8.9	-4.39	-4.62	14	2.95	9.41	5.41	7.59	18.5	0.205	10.3	6.4	5.93	3.26	-0.432	1.88	-0.051	3.58	16.1	4.25	0.914	12	5.7	0.0676	4.36	-1.17	8.65	7.06	1.88	1.02	2.32	2.63	3.82	3.42	0.249	0.768	-8.08	-3.54	3.71	4.44	6.03	6.65
cg00053086	1	233119296		NA	2	blue	-2.22	21.1	11.3	14.4	-10.3	2.94	-6.36	-0.496	-8.21	-17	3.33	-10.6	0.747	-1.9	-1.1	10.8	0.955	2.82	-1.48	-6.77	-2.14	2.32	-8.25	2.06	3.4	3.6	1.01	-2	1.05	3.08	1.29	0.34	-1.06	-1.77	-2.45	0.819	0.375	12.4	6.87	-1.01	-2.09	-7.74	-3.96
cg00053927	13	113699014	MCF2L;MCF2L	23263	4	yellow	-0.882	15.2	7.11	18.2	-2.17	4.89	-0.382	1.06	-6.17	-9.14	3.98	-9.89	7.07	-2.07	0.49	11.7	2.25	1.58	0.0686	-0.968	-0.505	3.69	-5.8	5.38	4.48	5.72	1.8	-0.634	3.03	5.45	3.63	0.972	0.937	0.531	-1.38	0.491	2.08	9.87	9.81	1.13	-0.624	-5.02	-1.31
cg00054301	16	67237548	ELMO3;MIR328	NA	5	green	1.55	-3.97	-7.73	3.29	19.6	3.76	13.2	5.15	1.64	8.31	1.89	0.547	14.6	-1.39	2.76	0.406	-0.537	-4.09	3.96	11.9	2.53	3.75	3.32	4.5	0.105	4.61	0.449	2.09	2.47	2.7	5.16	4.31	0.891	2.07	1.74	-0.0684	1.16	-2.66	1.51	2.77	1.4	2.3	5.75
cg00055341	2	200446845		NA	3	brown	-4.65	15.5	18.5	9.6	-11.9	6.04	-9.44	-0.986	-5.95	-9.32	5.89	-3.22	-0.822	5.2	-1.11	15.4	1.08	4.87	-4	-2.29	-3.51	3.82	-3.32	3.98	4.2	7.81	-0.238	2.21	7.12	5.48	-0.36	-0.941	1.68	-0.127	-1.04	0.241	0.413	11.2	4.19	0.536	-0.081	-4.62	-2.45
cg00055359	2	134023210	NCKAP5;NCKAP5	344148	4	yellow	-0.73	17.9	9.66	18.7	-3.09	6.32	-1.41	2.37	-5.78	-8.83	3.8	-8.55	7.16	0.131	0.126	13.6	2.71	3.21	0.327	-0.615	0.425	3.37	-4.73	6.29	4.67	7.17	2.24	1.66	4.4	6.14	2.58	0.936	0.0727	-0.265	-2.44	-0.913	1.88	9.2	7.48	1.24	-1.51	-3.4	-0.738
cg00055510	2	208907911		NA	2	blue	2.29	17.7	9.62	12.2	-6.38	1.93	-1.88	2.33	-2.71	-10.1	1.06	-7.28	2.16	-0.255	-0.911	9.2	2.32	6.49	3.12	-4.65	1.25	1.66	-4.09	5.22	2.61	3.36	4.58	0.86	1.25	2.76	3.99	1.2	-1.03	-0.97	-3.2	-0.382	-0.7	9.83	6.03	-0.381	-2.01	-3.38	-2.36
cg00058026	12	53172158	KRT76	51350	1	turquoise	14	1.19	-0.116	1.05	3.21	-5.24	9.22	12.4	9.56	3.27	-11.1	2.06	2.49	1.4	1.86	0.296	5.86	6.62	14.7	1.22	17.1	-7.37	9.25	7.32	-4.99	-1.36	6.47	4.46	1.37	-5.93	-0.861	2.64	0.376	1.62	0.678	0.301	-4.13	-6.13	0.04	-0.412	0.201	-0.0848	-0.65
cg00058291	1	228974133		NA	2	blue	-2.3	23.2	13.5	14.7	-9.68	4.34	-6.08	-0.452	-7.12	-14.1	4.18	-8.57	1.6	0.357	0.167	13	1.93	4.44	-1.64	-4.87	-2.02	2.81	-6.86	4.04	4.41	5.52	0.953	0.138	2.59	4.91	1.41	-0.634	0.281	-0.705	-2.23	-0.211	1.24	12.5	7.18	0.575	-1.52	-5.75	-3.76
cg00058708	2	24162568	UBXN2A	165324	10	purple	2.57	-9.13	-4.5	-4.79	12.7	2.64	8.92	4.19	7.72	17.7	0.145	9.5	6.08	5.56	2.94	-1.25	2.18	0.225	3.22	13.5	3.64	0.355	10.2	4.75	0.633	3.13	0.0167	7.06	5.96	2.29	0.806	1.01	2.97	3.45	3.58	-0.77	-0.262	-8.73	-3.25	3.42	3.87	10.1	6.02
cg00058879	22	40082173	CACNA1I;CACNA1I	8911	3	brown	1.47	11.1	17.6	4.07	-10.6	1.66	-5.71	0.687	1.66	-4.39	0.826	1.66	-3.87	8.12	-0.108	11	5.4	11.1	0.479	-2.11	0.989	-1.23	1.53	6.34	3.78	4	2.06	5.14	7.42	3.07	-1.77	-2.74	2.8	1.26	0.248	1.15	0.00345	4.99	2.67	0.136	1.85	-0.969	-3.55
cg00061031	9	100744026	ANP32B	10541	2	blue	-0.445	26.3	12.1	17.4	-8.4	4.08	-4.09	0.8	-6.56	-14.6	3.03	-10.3	2.96	-0.978	-0.209	12.4	2.9	4.52	0.0187	-5.28	-0.46	1.61	-6.84	4.9	3.55	4.97	2.3	0.0831	1.46	4.5	1.45	-0.734	0.37	-0.138	-1.9	0.75	0.9	10.8	8.13	0.151	-1.02	-6.47	-3.71
cg00062282	22	50747369	PLXNB2	23654	10	purple	3.36	-11.2	-5.26	-7.01	14.1	1.97	9.65	4.65	9.44	23.9	-0.371	12.5	5.03	6.37	2.53	-2.47	2.76	0.405	3.79	14.6	4.16	-0.323	12.8	5.04	0.364	2.53	0.308	7.69	6.03	1.45	0.604	1.25	3.06	3.49	3.8	0.573	0.409	-10.3	-4.61	3.3	3.91	7.98	5.27
cg00063535	12	113729491	TPCN1;TPCN1	53373	2	blue	-0.684	22.5	12.1	14.9	-8.61	3.22	-4.69	0.156	-6.09	-13.5	3.21	-8.83	2.11	-0.183	1.31	12.1	3.65	4.33	-0.618	-5.1	-0.992	1.41	-6.42	5.21	4.66	4.74	0.644	0.429	1.99	4.17	0.847	-0.933	0.413	0.764	-2.19	-0.0783	1.69	10.7	7.34	0.882	-1.43	-6.22	-4.85
cg00063982	1	53040491		NA	5	green	2.47	-5.83	-10.2	1.89	20.4	1.64	14.5	3.84	2.36	8.51	0.077	-0.0725	12.7	-3.21	2.46	-1.89	0.599	-5.03	3.72	10.2	3.03	1.48	2.68	2.7	0.458	1.57	0.737	0.988	1.01	1.47	3.74	2.74	0.474	1.47	1.33	-0.334	1.28	-4.84	1.37	3.12	0.379	1.87	5.43
cg00064840	7	4784485	FOXK1	221937	3	brown	-0.638	13.5	20.6	7.01	-11.3	4.2	-6.78	0.726	-0.57	-6.04	2.84	0.103	-2.47	7.67	0.485	14.3	4.42	9.67	-0.848	-1.48	-0.201	0.857	0.386	6.01	4.55	6.01	1.03	4.3	8.3	4.59	-1.11	-1.64	2.11	1.07	-0.936	1.31	0.323	7.47	2.47	1.07	1.07	-3.39	-3.09
cg00066184	3	118663697	IGSF11;IGSF11	152404	8	pink	8.9	1.98	1.67	2.3	4.92	-0.933	8.73	17.1	7.98	5.06	-3.73	3.51	4.88	4.04	2.33	3.37	3.22	6.56	15.7	4.75	10.6	-1.1	10.5	10.3	-2.91	4.01	5.3	6.67	4.54	-3.31	3.8	8.29	2.23	3.23	1.84	2.32	-3.15	-2.02	1.27	1.45	2.79	1.9	2.64
cg00066627	6	25693139	SCGN	10590	3	brown	0.121	13.1	18.2	4.89	-10.8	3.58	-6.18	1.22	1.18	-5.65	1.65	1.51	-3.65	8.72	-1.73	11.7	1.46	12.3	0.73	-1.52	0.557	2.68	1.05	5.52	2.2	6.49	3.43	5.32	7.75	4.24	1.47	-0.133	2.94	0.598	0.376	0.688	-0.572	8.9	2.32	-0.447	1.36	0.0476	-2.45
cg00066828	17	1837612		NA	5	green	1.18	-9.63	-14.8	-1.39	19.2	-0.416	12.1	2.79	1.24	8.16	-1.11	-0.188	8.68	-5.82	2.57	-6.4	-2.3	-7.88	2.79	7.12	2.18	1.83	1.82	-1.45	-1.85	-1.45	-1.25	-2.09	-2.67	-1.5	4.11	4.81	-2.05	0.603	0.114	0.0511	-0.577	-4.91	-1.06	2.57	-0.472	1.56	5.33
cg00067414	6	151188081	MTHFD1L	25902	10	purple	1.88	-13.5	-8.64	-8.18	12.6	0.449	7.37	1.39	6.84	17.8	-1.08	8.98	3.75	2.84	1.69	-6.66	1.18	-2.1	1.42	8.92	2.24	-0.991	7.91	0.518	-0.475	-0.884	-0.254	2.96	0.785	0.441	-0.142	-0.228	1.37	1.55	1.97	0.0422	0.621	-10.5	-4.09	2.58	1.89	8.54	5.49
cg00068038	2	36688564	CRIM1	51232	10	purple	2.13	-14.5	-6.96	-10.1	12.1	1.1	7.71	3.16	9.23	22	-1.07	13	2.43	5.37	2	-5.13	0.00815	-0.458	2.64	12.1	3.24	0.349	11.9	1.25	-1.19	0.863	-0.806	5.56	3.71	0.428	0.569	1.61	2.7	3.02	3.88	0.482	-0.325	-9.95	-5.87	2.57	3.82	8.03	5.48
cg00068750	16	2535955	TBC1D24	57465	5	green	3.44	-8.9	-7.8	-2.75	17.9	1.43	11.9	4.64	6.16	15.5	0.4	5.7	8.84	1.74	3.63	-2.67	2.57	-2.02	4.33	11.9	3.47	0.315	7.89	4.79	1.34	1.69	-0.0894	3.62	3.13	1.34	2.33	2.58	1.06	2.53	2.27	0.893	1.26	-7.35	-2.13	3.83	2.7	5.53	5.79
cg00070235	16	1682446	CRAMP1L	57585	2	blue	0.283	20.6	11.7	12.9	-10.5	0.639	-5.82	0.83	-5.49	-14.6	1.28	-9.08	-0.0291	-0.903	-0.646	9.19	2.26	4.62	0.688	-8.14	-0.25	0.349	-5.83	3.52	2.22	2.36	2.54	-1.73	0.151	0.981	0.845	0.275	-0.785	-2.38	-2.6	1.54	-1.27	11	6.98	-0.862	-2.13	-7.33	-5.29
cg00070460	4	1227676	CTBP1;CTBP1	1487	5	green	2.95	-10.3	-8.78	-3.27	21.6	2.01	13.7	4.68	6.26	18	0.208	6.87	9.33	1.82	4.09	-2.65	1.59	-2.71	4.09	14.6	3.64	1	8.32	4.38	0.398	2.33	-0.403	3.92	3.88	1.54	2.8	2.62	1.65	2.53	3.32	1.18	0.899	-8.29	-2.08	5.06	2.84	5.63	6.08
cg00071051	6	44222845	SLC35B2	347734	5	green	-0.0262	-8.5	-8.88	-0.809	20.4	4.07	11.2	4.23	2.5	13	1.7	4.03	11.7	0.44	4.14	-1.87	-0.841	-5.06	1.92	14	2.34	3.3	5.87	2.4	-0.0813	4.21	-2.44	2.44	2.57	2.5	2.64	3.8	1.08	2.74	2.29	0.973	0.939	-5.84	-1.61	4.54	1.94	4.53	6.56
cg00071391	4	126560514		NA	3	brown	1.1	15.4	20.9	6.14	-12.4	2.38	-7	2.8	0.664	-6.45	1.13	0.622	-3.4	8.28	-0.685	12.5	4.55	12.2	1.71	-3.11	1.68	-0.644	1.49	6.63	2.63	5.56	2.9	4.6	6.53	2.5	-1.91	-0.544	3.36	0.581	-0.267	1.96	-0.521	7.04	3.76	-0.2	0.554	-2.15	-4.73
cg00072407	19	12887524	HOOK2;HOOK2	29911	8	pink	3.48	1.96	0.987	3.15	4.6	1.81	5.16	18.9	2.61	3.13	-2.54	1.82	5.69	3.11	1.73	2.99	-2.59	2.29	11.5	4.78	9.65	2.62	8.78	5.09	-6.53	6.44	1.99	4.93	3.37	-4.22	3.17	14.2	0.752	1.19	1.32	1.97	-6.04	0.478	0.304	0.845	0.504	-0.27	1.96
cg00073090	19	1265879		NA	5	green	3.66	-13.3	-8.13	-7.59	16.3	0.687	11.3	4	9.39	21.8	-1.03	10.6	4.96	3.82	3.02	-4.18	2.34	-0.76	4.01	13.6	3.93	-0.675	10.6	3.18	0.448	0.683	-0.125	5.42	4.27	0.598	0.861	1.72	2.36	3.51	3.35	0.109	0.0237	-10.6	-4.34	3.13	3.59	9.31	5.96
cg00075698	6	15520937	JARID2	3720	5	green	3.88	-8.89	-10.6	-2.46	18	-0.579	14	4.08	4.89	11.6	-2.55	3.37	7.85	-1.85	3.58	-4.65	0.492	-3.74	4.59	9.08	4.72	-0.287	5.51	1.13	-0.98	-0.816	0.118	1.38	0.404	-0.901	2.59	3.29	0.358	1.3	2.86	0.45	-0.626	-6.87	-0.296	3.72	1.95	3.12	6.55
cg00076325	2	172974630		NA	3	brown	-0.952	14.7	19.2	7.6	-9.7	4.76	-5.91	0.497	-1.08	-6.03	3.58	-0.238	-1.22	7.93	-1.76	15.1	2.38	9.32	-0.595	-0.632	-0.717	3.47	-0.0762	7.24	4.01	8.1	2.85	6.48	8.88	5.78	1.59	-1.05	4.08	1.42	1.22	0.791	0.379	9.9	5.37	0.112	2.38	-1.48	-0.871
cg00076555	3	49705435	BSN	8927	5	green	0.461	-6.84	-6.55	-0.231	17.8	4.99	10	5.18	3	13.6	2.68	4.48	12	1.99	3.38	-0.381	-0.486	-3.42	2.78	14.3	2.17	3.9	6.78	4.5	0.283	5	-1.01	3.99	4.35	3.15	3.77	4.31	1.76	2.79	2.64	0.625	0.826	-4.69	-0.755	3.69	3.46	4.35	6.28
cg00076653	4	15341878	C1QTNF7	114905	7	black	2.48	-13.6	-7.75	-8.61	13.8	1.35	10	2.3	9.07	18.9	-0.129	11	3.44	4.11	1.76	-4.27	0.546	-0.468	2.87	13	2.02	0.833	9.02	2.02	0.157	0.829	0.13	5.41	4.27	1.54	2.13	1.11	3.14	3.7	4.37	-0.406	1.03	-8.83	-4.11	2.53	4.64	8.57	6.86
cg00077904	5	151078909		NA	3	brown	-1.82	17.4	23.7	7.75	-13.6	5.03	-9.02	0.143	-2.15	-8.44	4.06	-0.818	-2.78	7.7	-0.888	15.2	3.01	9.52	-1.46	-2.79	-1.4	2.08	-1.29	6.4	3.92	7.38	1.39	4.55	7.19	5.38	-0.489	-1.77	3.23	0.705	0.696	1.27	0.408	9.4	3.98	0.172	1.67	-2.23	-4.23
cg00078334	16	55513961	MMP2	4313	3	brown	0.243	9.94	18.8	4.43	-8.28	4.39	-4.77	2.03	1.68	-1.84	1.83	3.49	-1.77	10.8	0.731	13.7	4.58	10.5	0.18	1.29	1.57	0.578	3.32	7.3	3.4	7.09	1.39	7.06	11.2	4.48	-1.47	-1.62	3.36	1.58	0.354	0.239	-1.04	4.56	1.2	1.64	1.88	-0.198	-2.71
cg00079023	5	139492535	PURA	5813	5	green	0.113	-6.08	-8.82	1.79	18.5	4.02	10.5	3.94	0.584	10.1	1.42	1.12	14.4	-1.35	4.02	-1.37	-0.612	-6.16	1.71	11.5	2.33	2.48	3.65	2.19	-0.349	3.74	-1.87	0.282	1.22	2.48	2.32	2.85	0.215	0.52	1.39	0.773	0.537	-5.56	0.375	4.92	0.305	3.58	5.74
cg00079302	19	1439985	RPS15	6209	2	blue	-2.12	22.6	11.6	16.6	-7.36	4.85	-4.8	0.185	-7.34	-12.9	4.92	-9.35	3.65	-0.0168	0.104	13	1.64	3.44	-1.17	-3.82	-2.17	3.87	-6.82	5.29	4.37	6.77	1.24	0.443	2.29	5.44	2.48	0.162	1.07	0.0908	-1.81	0.644	1.26	13.3	8.87	0.0982	-0.414	-5.54	-3.19
cg00080333	4	184492770		NA	3	brown	-0.341	18.5	19.8	9.5	-11.8	4.13	-6.7	0.944	-2.28	-8.38	2.93	-2.44	-0.921	5.78	-0.0201	14	3.86	8.55	-0.122	-3.53	-0.333	1.42	-1.56	6.15	4.58	5.99	2.06	3.86	5.53	4.72	0.222	-1.02	2.93	1.24	-0.337	1.18	0.903	9.33	5.51	0.837	1.13	-4.49	-3.89
cg00081417	6	140400137		NA	5	green	4.95	-11.6	-6.47	-8.45	11.6	-0.287	10.4	4.02	11.4	17.5	-2.73	11.3	2.29	4.5	1.94	-4.19	1.69	1.36	5.05	10.8	4.7	-1.42	11	3	-1.46	0.0292	1.54	5.82	3.88	-0.316	1.04	0.906	2.72	2.59	4.05	0.206	-0.422	-10.1	-4.29	2.85	3.51	7.23	5.53
cg00081799	1	6390793	ACOT7;ACOT7;ACOT7;ACOT7	11332	5	green	1.81	-10.3	-16.7	-1.44	19.1	-1.34	12.2	2.24	0.865	8.37	-1.87	-1.01	9.13	-6.93	2.76	-7.48	-0.819	-8.92	2.26	6.22	2.42	-0.462	1.28	-2.21	-1.48	-3.02	-1.52	-3.34	-3.43	-2.21	1.71	3.07	-2.64	0.176	0.0723	-0.934	0.0616	-7.15	-0.914	2.25	-0.883	2.07	5.03
cg00083018	6	101840329		NA	3	brown	-0.603	10.2	17.2	5.21	-8.77	5.36	-5.84	0.124	0.334	-3.37	3.07	1.96	-1.71	9.01	-0.364	13	4.21	9.09	-1.31	0.468	-0.238	1.13	1.45	6	4.4	6.43	1.56	5.24	9.51	5.97	-1.22	-2.46	4.31	1.62	1.26	2.18	0.231	5.95	3.13	1.13	2.4	-0.76	-1.82
cg00084094	12	109096204	CORO1C	23603	2	blue	-2.52	19.5	10.1	16	-6.81	5.48	-4.66	1.35	-7.95	-12.6	4.17	-10.1	3.86	-1.1	-0.246	11.3	0.632	2.21	-0.885	-3.95	-1.15	3.63	-6.12	3.8	3.15	6	0.959	0.14	1.52	4.38	1.99	1.2	0.194	-0.57	-1.85	0.579	0.149	11.1	7.61	0.262	-1.31	-6.61	-1.95
cg00084347	12	124393913	DNAH10	196385	2	blue	-1.29	25.5	15.7	15.6	-9.06	5.44	-5.36	0.846	-5.5	-11.9	4.68	-7.02	2.47	2.19	-0.734	14.5	2.08	5.72	-0.299	-3.95	-1.49	3.81	-4.87	6.08	4.45	6.96	2.64	1.52	3.56	5.82	2.94	0.361	2.12	0.476	-0.499	1.74	0.551	13.3	8.56	0.256	0.479	-5.8	-2.76
cg00084432	13	36944471	SPG20	23111	2	blue	0.038	26.1	12.9	16.1	-9.71	2.89	-4.79	0.294	-6.03	-15.5	2.08	-10	1.55	-1	-0.461	12.1	2.37	5.16	0.221	-6.3	-0.437	1.73	-6.92	3.96	3.91	3.82	2.69	-0.503	1.56	3.79	1.97	-0.171	0.238	-0.232	-2.48	-0.0817	0.703	12.4	8.1	-0.543	-1.52	-6.96	-3.84
cg00085013	3	14871570	FGD5	152273	3	brown	1.73	20.1	17.2	11.2	-9.1	3	-3.79	3.23	-1.26	-8.65	1.89	-3.47	0.37	4.56	-0.0547	14.7	4.22	9.5	2.68	-2.75	1.47	1.36	-1.12	7.9	3.91	6.14	3.63	4.18	6.41	3.5	1.71	0.936	3.21	1.87	-0.0425	1.7	0.2	9.7	6.59	0.0722	1.71	-4.87	-3.32
cg00085199	8	141106596	TRAPPC9;TRAPPC9	83696	5	green	1.89	-8.49	-10.8	-0.826	20.3	1.23	13.7	3.87	2.97	10.7	-0.376	1.92	10.4	-2.31	2.57	-3.15	-0.306	-5.09	3.21	10.9	3.18	1.05	4.13	1.24	-0.568	1.17	-0.504	0.829	1.2	0.419	2.58	3.05	-0.944	0.0362	0.618	-0.7	0.633	-6.8	-1.46	2.89	-0.303	3.79	6.16
cg00085493	1	208040203		NA	5	green	1.82	-9.54	-10.4	-2.47	18.2	1.57	10.1	3.51	3.35	13.6	-0.0495	3.58	9.69	-0.698	3.36	-4.66	0.745	-4.98	2.27	9.61	2.93	0.0791	5.83	1.6	-0.691	0.815	-0.777	0.912	0.275	0.572	0.747	1.81	-0.43	0.159	1.23	0.548	-0.274	-8.47	-2.36	3.57	0.042	4.85	4.86
cg00086429	2	206566025	NRP2;NRP2;NRP2;NRP2;NRP2;NRP2	8828	8	pink	2.92	0.1	-0.371	2.91	8.04	3.42	7.54	17.8	3.42	5.98	-1.48	2.81	8.03	3.38	2.18	3.4	-0.954	1.52	9.58	8.39	9.16	2.26	9.87	6.19	-4.67	7.27	1.33	5.93	5.2	-2.23	2.37	11.5	0.387	0.584	1.68	2.04	-5.18	-2.11	-0.949	2.62	0.48	0.293	3.48
cg00087244	7	74042487		NA	3	brown	-2.17	21.3	18	11.4	-11.5	5.32	-7.9	0.711	-4.43	-10.8	4.21	-4.32	-0.0805	4.3	-0.815	14.2	1.01	7.06	-1.08	-4.06	-1.45	3.89	-3.3	5	3.2	7.27	1.5	1.96	4.19	5.14	1.74	0.287	2.15	0.397	-0.937	1.04	0.582	12.9	6.02	0.255	0.487	-4.43	-3.15
cg00088797	3	12976288	IQSEC1;IQSEC1	9922	10	purple	1.04	-10.6	-7.26	-4.23	16.7	3.62	9.95	4.76	5.52	17.6	1.06	8.33	7.79	3.46	3.25	-2.55	-0.202	-2.61	2.97	14	2.9	2.09	8.91	2.44	-0.272	3.02	-1.3	3.78	4.19	1.8	2.06	3.87	2.21	2.74	3.25	0.671	-1.24	-7.28	-2.55	4.44	3.11	6.81	6.13
cg00088844	12	52317349		NA	3	brown	2.01	12.3	20.1	5.76	-8.23	3.57	-4.02	2.84	2.45	-2.43	1.77	2.87	-1.24	10.8	0.236	14.7	6.72	12.3	1.82	0.544	2.06	-0.405	3.35	9.87	4.29	6.76	3.15	8.02	10.7	4.53	-0.994	-1.81	4.09	1.88	0.831	0.794	0.00825	4.76	3.05	1.79	2.21	0.723	-1.92
cg00089453	5	150003037	SYNPO;SYNPO	11346	5	green	1.67	-12.4	-8.5	-5.36	20.1	2.95	12	4.44	6.71	21	0.48	9.01	7.9	3.26	3.34	-2.73	1.41	-2.62	2.89	17	3.36	0.821	9.59	3.91	0.221	3	-1.05	6.4	5.08	1.86	1.07	2.04	2.22	3.15	3.46	0.298	0.502	-9.98	-3.58	3.92	3.11	7.84	6.48
cg00089821	6	170807096		NA	3	brown	-2.57	12.2	24.6	4.38	-13.4	5.38	-10.4	0.0811	-1.06	-5.04	3.55	2.54	-4.06	11	-1.04	13.7	2.14	10.2	-2.34	-1.47	-1.04	2.25	1.21	5.07	3.09	7.74	0.654	5.43	8.59	5.02	-1.65	-1.49	3.62	0.51	0.669	1.81	-0.131	7.99	1.65	0.605	1.86	-0.878	-2.89
cg00089823	5	1932098		NA	10	purple	2.9	-9.82	-4.61	-7.27	10.7	1.58	7.06	3.94	8.93	18.3	-1.08	11.4	3.51	6.29	3	-3.5	1.76	1.09	3.3	11.3	4.19	-0.537	11.6	3.83	-1.36	2.11	-0.311	7.03	3.2	1.11	-0.0897	0.603	3.57	2.44	3.45	0.89	0.233	-9.03	-3.04	3.85	3.82	7.92	6.01
cg00090282	3	21761217	ZNF385D	79750	2	blue	-0.638	19.9	11.9	14.4	-7.55	3.87	-3.64	1.32	-5.36	-12.1	3.39	-7.75	2.21	0.421	-0.701	12.5	1.34	4.85	0.651	-3.89	-0.895	3.53	-5.4	4.8	3.76	5.51	2.48	1.19	3.31	4.12	3.19	1.41	0.497	0.769	-1.44	1.04	-0.693	12.5	6.89	0.185	-0.441	-5.17	-2.22
cg00090452	12	111253413		NA	8	pink	8.24	1.23	1.23	0.545	3.58	-1.81	7.26	17.3	7.76	4.25	-6.15	3.88	2.55	4.02	0.808	1.75	2.16	6.32	14.5	3.54	13	-2.35	10.8	7.34	-5.9	3.09	4.63	6.77	3.33	-5.23	1.17	7.86	2.01	2.68	2.25	1.29	-3.82	-2.97	0.302	-0.0361	2.9	1.35	1.95
cg00090782	10	43248870		NA	17	grey60	11.6	2.96	2.64	1.86	1.59	-3.64	6.73	6.87	8.06	2.43	-7.44	1.84	1.68	2.72	2.86	2.79	17.1	7.32	8.07	1.25	11.5	-13.8	6.39	9.66	1.37	-1.19	4.75	5.68	3.16	-1.86	-7.49	-4.31	0.93	2.34	-0.0412	0.0216	-0.857	-8.71	0.0524	1.6	0.839	0.481	-2.89
cg00091960	7	126829514	GRM8;GRM8;GRM8	2918	2	blue	3.63	21.8	11.7	12.3	-9.84	0.21	-3.14	0.804	-2.21	-13.4	-0.693	-8.04	-0.124	-0.671	-1.06	9.59	3.35	8.1	2.73	-7.32	1.74	-0.228	-5.01	4.66	2.44	1.71	5.23	0.0241	0.617	2.21	2.55	-1.12	0.37	-0.152	-1.79	-0.202	0.326	9.74	7.6	-1.18	-1.1	-5.69	-4.08
cg00092309	4	185934797		NA	3	brown	-2.16	12.7	19.8	6.11	-11.8	5.29	-8.41	-0.496	-1.53	-5.95	4.27	0.49	-2.71	8	-1.21	13.5	2.95	8.53	-2.18	-1.71	-1.93	2.07	-0.338	4.61	5.03	6.44	1.16	3.73	7.89	5.77	-0.854	-1.62	2.57	-0.0258	-0.089	1.13	1.25	8.36	3.28	0.617	0.816	-1.32	-2.08
cg00092443	20	46578370		NA	8	pink	6.17	3.03	3.24	2.76	3.29	1.14	6.15	17.6	6.31	4	-2.66	3.56	4.37	5.51	1.27	4.75	1.72	6.55	12.9	5.25	10.1	0.256	10.6	9.79	-3.99	6.07	4.55	7.96	5.76	-2.6	3.1	8.62	2.33	2.39	2	2.15	-3.65	-1.08	0.357	0.923	2.08	0.627	1.56
cg00093354	17	15635464	TBC1D26	353149	8	pink	3.89	3.25	3.11	3.72	4.04	2.91	4.98	18.1	3.75	3.72	-1.09	2.75	5.72	5.53	1.16	5.42	0.0396	4.56	10.8	6.06	9.18	2.03	9.99	10.7	-5.12	8.84	3.17	8.33	5.63	-1.98	2.94	9.8	1.9	0.99	1.37	2.18	-4.36	0.0265	0.401	1.27	1.28	0.435	1.07
cg00093522	1	2252019		NA	8	pink	3.03	0.161	0.683	1.25	5.08	2	5.05	20.7	3.67	4.95	-2.25	3.62	4.71	4.44	1.17	2.5	-1.22	2.5	11.2	6.02	9.76	0.607	10.8	5.58	-6.98	6.21	1.73	5.36	4.42	-4.79	0.391	12.4	0.951	0.386	1.72	3.73	-6.25	-2.16	-1.15	0.932	0.852	0.765	2.07
cg00094734	2	96830479		NA	2	blue	0.388	20.4	11.6	12.5	-10.7	0.411	-5.53	0.874	-5.28	-15.5	1.21	-9.09	-0.671	-1.24	-0.471	9.75	2.29	4.97	1.12	-7.84	-0.312	-0.00306	-6.23	3.46	2.39	2.14	2.12	-1.05	0.296	0.897	0.695	0.404	-0.429	-1.07	-2.45	0.511	-0.47	10.8	6.9	-0.889	-1.98	-6.88	-5.04
cg00095018	6	36101338	MAPK13	5603	5	green	2.14	-6.2	-9.9	1.23	22.2	3.5	13.6	4.56	2.29	10.8	1.16	1.38	13.8	-1.77	3.49	-1.93	0.419	-4.73	3.63	11.6	2.94	2.29	3.96	4.14	0.186	3.25	0.0455	2.4	1.27	2.61	3.79	2.69	0.15	1.1	2.28	0.75	0.457	-5.71	-0.211	3.54	1.18	3.63	5.43
cg00095431	2	67775781		NA	3	brown	-0.778	12.2	22.2	3.77	-13.1	4.57	-8.55	-0.185	0.857	-5.01	3.23	2.82	-4.79	10.6	-0.831	12.4	2.06	12.9	-0.896	-1.73	-1.09	2.35	1.18	4.72	3.4	6.58	1.78	5.23	8.49	5.47	-0.0983	-1.51	3.72	1.44	0.763	1.95	-0.182	8.9	1.6	-0.122	2.69	0.29	-3.14
cg00095523	12	115105485		NA	4	yellow	0.229	15.1	7.08	18.9	-1	5.08	0.902	2.35	-5.36	-8.1	3.3	-9.35	8.28	-1.25	0.483	12.6	3.16	2.03	1.09	0.379	0.745	2.96	-4.83	7.01	4.47	6.48	2.31	1.81	4.71	5.79	3.17	0.866	-0.327	-0.209	-3.15	-1.16	2.07	8.44	7.85	1.29	-1.34	-4.15	0.182
cg00095930	12	109569116		NA	4	yellow	-1.91	21.2	15	15.9	-7.27	5.47	-3.95	-0.0248	-5.78	-10.7	5.45	-6.81	3.24	2.05	0.244	16.9	3.86	4.91	-1.3	-1.93	-2.16	2.85	-5.4	6.5	6.46	6.89	1.42	1.93	6.02	6.39	1.62	-0.874	1.74	0.337	-1.37	-0.123	1.61	11.7	8.49	1.56	0.031	-5.26	-2.2
cg00096536	4	154711906		NA	10	purple	1.97	-8.27	-3.13	-4.67	11.7	3.45	8.62	3.9	7.79	17.1	0.951	10.5	5.41	6.82	2.46	0.189	2.16	0.83	2.77	15.2	2.94	1.35	10.9	5.15	1.68	4.09	0.285	9.1	7.97	3.28	1.57	1.39	3.52	4.26	3.45	-0.735	0.385	-6.5	-2.67	3.77	4.22	6.02	7.42
cg00097088	4	2627246	FAM193A;FAM193A	8603	5	green	-0.68	-3.13	-8.3	5.34	17.6	4.77	10.3	3.05	-2.04	5.78	3	-3.18	17.4	-4.15	3.17	0.198	-1.62	-7.03	1.13	9.45	0.822	4.43	0.279	1.96	0.777	4.08	-1.25	-1.02	0.325	3.41	4.53	3.7	-0.967	0.279	-0.199	0.435	0.704	-1.67	2.07	3.78	-0.219	1.18	6.53
cg00097800	2	46593258	EPAS1	2034	5	green	5.25	-8.28	-12.4	-1.61	18.7	-1.37	14.6	4.83	4.94	10.9	-2.94	1.69	9.29	-3.37	2.99	-5.96	0.165	-4	5.92	7.08	5.13	-0.385	5.14	1.42	-2.15	-1.22	1.37	0.0377	-2.24	-1.35	3.45	3.06	-0.656	1.04	1.39	0.966	-0.886	-7.85	-1.46	2.16	-0.0807	2.66	4.6
cg00098297	12	117401813	FBXW8;FBXW8	26259	2	blue	1.82	18.6	10.7	13.4	-6.5	2.18	-2.07	1.43	-3.35	-10.3	1.23	-7.54	2.66	0.0302	-0.232	10.6	3.73	6.06	1.8	-4.22	1	0.661	-4.56	5.34	3.82	3.67	3.79	0.469	2.3	3.36	2	-0.318	-0.167	-0.0759	-2.7	-0.177	0.069	9.26	6.79	-0.672	-1.77	-4.38	-3.92
cg00098451	1	16370634	CLCNKB	1188	22	darkgreen	-10.7	2.37	2.64	3.48	-0.456	9.32	-4.88	-2.18	-7.13	-1.6	10.2	-0.846	2.97	2.02	-1.47	4.49	-13.9	-2.96	-5.2	3.34	-8.44	24.2	-3.23	-2.23	0.947	9.1	-2.81	-0.399	2.94	6.72	12.7	7.19	1.82	0.0424	1.56	0.718	0.648	14.3	2.58	0.655	1.91	-0.404	5.11
cg00098985	20	1275312	SNPH	9751	2	blue	-0.702	26.3	13.4	16.6	-8.99	3.83	-5.07	0.351	-6.26	-14	3.45	-9.3	2.48	0.0856	-0.277	12.7	2.66	4.84	-0.329	-5.48	-1.1	2.32	-6.35	5.45	4	5.38	2.34	-0.0504	1.8	4.72	2.05	-0.711	0.387	-0.616	-2.74	1.2	1.18	12	7.85	0.271	-1.31	-6.21	-4.01
cg00099766	6	90120705	RRAGD	58528	5	green	1.85	-10.8	-11.8	-3.11	20	1.37	11.7	2.99	3.78	14.7	-0.523	3.98	9.35	-1.05	2.95	-5.32	0.229	-5.27	2.35	10.5	2.9	0.462	5.61	1.18	-0.775	0.359	-0.806	1.85	0.327	0.737	1.57	1.68	0.158	1.18	1.8	-0.87	0.078	-8.72	-2.15	3.61	1.01	5.2	6.03
cg00100538	4	184067792	WWC2	80014	2	blue	6.01	17.2	9.88	10.9	-7.59	-1.02	-1.21	2.42	-0.0419	-9.97	-2.6	-6.42	0.408	-0.33	-0.33	8.22	5.81	8.55	4.56	-6.3	4.21	-2.7	-2.56	6	2.79	0.686	6.05	0.91	0.77	1.22	1.06	-1.13	0.109	-0.0118	-1.59	1.04	-0.618	6.21	6.5	-1.74	-0.807	-4.46	-5.28
cg00100762	1	204034928		NA	2	blue	-0.764	25.6	14	16	-9.66	3.69	-5.54	1.11	-6.13	-14	2.8	-8.89	1.83	0.168	-0.0502	12.7	2.58	4.94	-0.0774	-5.65	-0.329	1.71	-5.73	4.31	3.52	4.88	1.77	0.137	2.06	3.86	1.02	0.123	0.663	0.151	-2.33	0.961	-0.32	11.4	7.86	0.0411	-1.41	-6.25	-4.2
cg00101457	10	11246612	CUGBP2;CUGBP2;CUGBP2;CUGBP2	NA	5	green	2.13	-11.4	-9.88	-3.92	21	2.38	12.7	4.68	5.68	16.7	0.231	6.49	8.51	1.19	3.25	-3.74	-0.538	-3.25	3.79	13.5	3.17	1.94	7.73	2.18	-0.869	2.02	-0.54	2.9	2.98	1.07	3.07	3.79	1.23	2.27	2.59	0.823	-0.473	-7.74	-3.21	4.13	2.01	6.93	6.45
cg00101728	6	2953027	SERPINB6	5269	3	brown	-2.05	17.9	17.9	10.6	-10.8	4.6	-7.55	0.175	-4.07	-9.39	4.12	-3.52	-0.124	4.71	-0.531	14.5	3.09	6.55	-1.62	-3.25	-1.43	2.37	-2.7	5.39	4.58	6.71	1.41	2.44	5.47	5.04	0.0736	-0.731	3.02	1.23	0.204	0.601	1.11	10.3	6.47	1.39	1.06	-2.82	-1.35
cg00102955	1	150230345	CA14;CA14	23632	3	brown	-3.47	13.3	21.2	7.42	-10.7	7.73	-8.11	0.228	-2.65	-6.03	6.16	0.131	-1.35	8.31	-0.997	15.9	2.59	7.95	-2.55	-0.174	-2.6	3.65	-0.833	5.38	5.72	8.6	0.577	4.55	9.09	6.93	-0.104	-0.251	3.45	1.61	0.574	1.72	0.758	9.49	3.41	1.11	2.43	-2.2	-2.11
cg00103398	1	173834155	SNORD47;GAS5;SNORD81;SNORD80	NA	8	pink	10.4	1.36	0.342	1.39	4.69	-1.84	9.1	18.5	8.54	4.28	-6.15	2.83	3.7	2.52	0.823	1.51	3.16	6.33	17.5	3.3	13.7	-3.22	10.5	8.26	-4.72	1.82	6.43	5.35	2.39	-5.16	2.19	8.43	0.534	1.55	0.965	2.45	-5.13	-3.06	-0.0184	-0.124	1.4	0.937	0.468
cg00103961	20	62096129	KCNQ2;KCNQ2;KCNQ2;KCNQ2;KCNQ2	3785	4	yellow	-0.543	17.8	8.94	17.5	-3.39	5.1	-1.72	1.48	-5.63	-9.05	4.68	-8.61	6.52	-0.0792	0.0947	12.2	2.75	3.09	0.378	-1.36	-0.751	3.6	-4.85	7.85	4.69	7.26	2.24	1.47	2.91	6.1	3.37	0.343	2.22	1.65	-0.249	1.06	2.63	9.96	10	0.404	1.38	-3.42	-0.922
cg00105102	1	156217178	PAQR6;PAQR6	79957	3	brown	0.785	18	16.1	10.9	-9.97	3.12	-5.52	1.67	-2.42	-9.29	1.06	-3.98	0.128	3.86	0.693	12.5	4.01	7.88	0.478	-4.1	1.39	0.0299	-1.93	4.8	3.02	4.8	2.04	1.27	4.5	3.4	-1.19	-0.941	1.5	0.0682	-1.4	1.66	-0.00334	8.5	5.35	0.803	-0.498	-4.78	-3.98
cg00105306	15	85194978	WDR73	84942	5	green	0.316	-9.09	-12.6	-0.336	23.7	2.45	12.9	3.76	1.28	11.5	0.685	1.65	12.4	-2.5	2.73	-3.68	-1.97	-7.29	2.22	11.9	2.26	2.85	3.73	1.48	-1.68	2.53	-1.28	1.45	0.529	1.1	3.25	3.4	0.631	1.18	2.1	-0.826	0.197	-6.19	-0.132	2.62	0.998	3.47	6.77
cg00106808	2	3045057		NA	8	pink	4.6	2.27	1.73	3.29	4.74	1.72	6.15	18.7	4.27	3.95	-2.25	2.49	5.92	4.04	0.943	3.88	-1.59	3.99	12.3	5.43	9.58	2.61	9.66	7.3	-5.37	6.69	3.77	5.96	4.42	-3.17	4.74	12.3	1.48	0.83	1.76	2.94	-5.03	0.185	0.936	0.768	1.17	0.00176	2.52
cg00109344	9	116344532	RGS3;RGS3;RGS3;RGS3	5998	3	brown	-1.83	16.6	19.9	7.18	-14.2	3.98	-9.59	-0.193	-2.71	-9.57	3.53	-1.83	-3.38	5.92	-1.65	12.8	2.71	8.38	-1.64	-4.25	-1.43	1.44	-1.97	5.04	3.44	5.85	1.39	3.48	4.94	4.39	-0.894	-1.67	2.16	0.458	-0.257	1.42	0.899	8.99	3.37	-0.946	1.02	-2.41	-4.4
cg00112238	1	54719938	SSBP3;SSBP3;SSBP3	23648	5	green	2.44	-12.8	-8.56	-6.47	18	1.15	11.6	5.66	7.7	19.5	-0.78	9.44	6.11	3.37	2.34	-3.49	0.727	-2.13	4.16	15.1	4.32	0.341	10.7	3.51	-1.34	2.31	-0.208	5.66	4.64	-0.327	1	3.37	1.62	2.79	3.24	-0.217	-0.17	-9.56	-4.41	2.2	2.98	6.55	5.85
cg00113096	2	134119805	NCKAP5;NCKAP5	344148	3	brown	-0.818	13	21.8	4.7	-13.1	4.37	-8.01	-0.63	0.29	-5.85	3.25	1.48	-4.4	8.82	-1.9	12.7	2.18	11.5	-1.02	-2.17	-1.36	2.27	0.131	4.62	3.7	5.89	2.55	4.96	7.54	5.43	0.498	-1.72	4.1	1.52	0.988	1.77	0.777	9.03	3.17	-0.62	2.58	-1.2	-2.97
cg00114346	7	157207886	DNAJB6	10049	5	green	2.76	-7.45	-11.5	0.15	20.3	0.421	14.9	3.75	2.52	9.36	-1.24	0.759	11.1	-3.41	3.75	-3.33	-0.381	-5.35	3.63	9.72	3.63	1.04	3.31	1.46	-1.29	0.845	-0.693	0.384	0.175	0.179	3.06	2.75	-0.807	1.22	0.586	-0.465	0.549	-5.8	-0.22	3.1	0.528	1.69	5.75
cg00114478	8	73658110	KCNB2	9312	3	brown	-2.62	15.9	21.4	6.83	-15.4	4.32	-11.4	-0.673	-3.06	-9.11	3.24	-1.47	-3.75	6.67	-2.13	12.7	1.69	8.43	-2.58	-4.6	-1.57	1.88	-1.68	3.9	2.46	6.13	1.38	3.3	4.85	4.38	-1.41	-1.97	1.86	-0.775	-1.42	1.31	-0.0313	9.48	2.88	-0.868	-0.441	-2.97	-4.1
cg00116058	5	154320652	MRPL22;MRPL22;MRPL22;MRPL22	29093	11	greenyellow	-14.2	0.856	2.09	2.83	-0.351	10	-6.62	-4.82	-9.43	-1.13	17.8	-1.27	2.45	1.41	-0.224	4.3	-4.69	-5.74	-9.52	3.19	-14.3	10.1	-5.1	-1.84	6.47	6.6	-6.17	-0.609	2.83	7.24	2.56	1.66	1.56	0.15	0.241	0.424	3.07	6.71	1.41	2.84	1.01	0.135	2.51
cg00116686	1	28077531	FAM76A;FAM76A;FAM76A;FAM76A;FAM76A	199870	8	pink	9.74	1.63	1.13	0.973	3.24	-2.64	7.68	17.6	8.32	3.77	-6.62	3.32	2.41	3.4	1.35	1.47	2.63	6.68	16.1	2.73	13.5	-3.4	10.8	7.45	-5.77	1.91	5.69	6.27	2.55	-5.92	1.2	8.08	1.59	2.13	0.876	1.11	-5.53	-2.76	0.0798	0.475	1.11	0.158	0.412
cg00117599	17	45962589		NA	2	blue	-1.97	19.7	19.4	10.7	-11.4	5.32	-7.73	-0.441	-4.05	-9.53	4.59	-3.45	-0.23	5.2	-0.73	15.4	3.09	7.13	-2	-3.14	-1.96	2.51	-2.89	6.23	4.78	7.3	1.66	3.04	5.56	6.28	0.354	-2.1	2.35	0.171	-0.643	1.45	1.25	10.4	5.64	0.748	0.715	-4.16	-2.96
cg00118317	21	34392029		NA	10	purple	4.02	-7.45	-1.99	-4.97	10.7	2.76	8.86	4.61	10.3	18.6	0.082	12.1	5.01	8.34	2.38	0.304	4.43	3.38	4.24	14.5	4.23	-0.55	12	6.71	1.56	3.61	1.45	9.19	7.59	3.04	0.751	0.227	3.11	3.02	3	-0.539	1.77	-8.22	-3.32	3.34	3.95	10.2	5.29
cg00118342	2	106777038	UXS1	80146	5	green	4.26	-8.64	-11.8	-1.11	22.1	0.0401	16.8	4.69	4.86	11.6	-1.89	2.23	10.3	-2.53	3.09	-3.98	0.801	-4.24	5.16	10.8	4.6	0.168	4.75	2.43	-0.828	0.0743	0.664	2.1	0.982	-0.132	3.44	2.83	-0.388	1.83	1.26	-0.737	0.33	-7.74	-1.13	2.36	0.997	3.71	5.45
cg00118808	9	132097931		NA	10	purple	1.5	-15.5	-7.44	-9.89	13.8	1.35	7.88	3.31	8.61	24	-0.239	13.1	3.27	5.54	2.95	-4.84	0.784	-1.16	2.27	13.3	2.72	0.0864	11.6	1.9	-0.588	1.24	-1.7	5.43	4.49	0.465	-0.138	1.55	1.92	2.56	3.05	0.105	0.174	-11	-6.61	4.04	3.04	8.65	6.03
cg00119241	1	15152595	KIAA1026;KIAA1026	NA	5	green	2.66	-7.35	-10.1	-0.416	20.9	2.04	13.8	5	3.93	11.3	-0.291	2.59	11	-1.55	3.58	-3.19	-0.0873	-3.9	4.48	10.6	3.84	1.97	5.06	2.72	-0.696	2.05	0.076	2.01	0.507	1.25	3.89	3.88	1.15	2.49	1.82	0.0251	0.453	-5.94	-0.186	3.77	0.906	2.94	5.69
cg00120332	6	88432950		NA	2	blue	2.91	18.4	12.9	9.74	-9.96	1.24	-3.59	1.68	-1.06	-10.5	0.278	-4.67	-1.04	1.9	-0.0924	10.3	3.32	9.17	2.92	-5.59	1.36	0.298	-2.88	5.47	2.93	3.06	3.63	1.71	2.62	2.57	2.17	-0.244	1.78	1.14	-0.685	1.01	0.639	9.07	6.09	-0.178	0.0912	-3.96	-3.47
cg00120948	1	8484417	RERE;RERE;RERE	473	10	purple	1.85	-16.7	-9.06	-10.1	14.4	0.713	8.22	2.85	8.43	23.5	-1.15	11.8	3.41	4.36	2.68	-6.46	0.27	-1.94	2.16	11.8	3.05	-0.36	10.9	0.96	-1.65	0.309	-1.44	4.68	2.71	-0.165	-0.309	1.16	1.48	1.88	2.7	0.587	-0.367	-11.2	-6.22	3.07	2.5	8.73	6.48
cg00121366	20	62282182	STMN3	50861	5	green	1.27	-6.67	-10.9	1.57	23.8	2.78	14.1	4.11	1.47	10.1	0.974	0.689	14.3	-2.67	3.28	-1.98	-1.26	-5.94	3.14	11.9	2.48	3.14	3.17	2.39	-0.552	2.91	-0.705	1.04	1.17	1.84	4.25	3.74	-0.17	1.12	1.24	-0.761	0.676	-4.62	0.343	3.11	0.451	3.05	6.76
cg00122679	10	125673028		NA	5	green	2.15	-6.71	-10.3	0.243	18.6	1.55	12.9	3.92	2.5	8.95	-0.286	1.05	10.7	-2.54	2.51	-3.06	-0.418	-4.69	3.5	9.55	3.08	1.33	3.23	1.88	-1.04	1.42	0.279	1.36	0.419	0.794	2.92	2.84	-0.391	1.34	0.805	-0.591	-0.245	-5.47	-0.398	1.86	0.158	4	4.44
cg00122765	17	29457918	NF1;NF1;NF1	4763	10	purple	2.16	-7.75	-3.13	-4.07	12.9	4.02	8.67	4.68	7.95	18.1	2.27	10.8	6.43	7.07	3.34	0.423	2.69	1.34	3.63	15.7	2.46	1.84	10.7	6.48	2.25	4.93	-0.481	7.04	7.45	3.81	2.39	2.17	3.66	3.6	4.06	0.992	1.61	-6.55	-2.74	4.29	4.98	7.52	5.77
cg00123090	1	234667087		NA	2	blue	-1.23	19.7	19.5	12	-8.65	6.12	-5.25	1.7	-3.16	-7.66	4.57	-2.86	1.67	6.02	0.384	17.7	4.18	7.79	-0.424	-0.841	-0.344	2.54	-1.65	7.9	5.44	8.58	1.66	4.51	7.85	6.23	0.59	-0.358	2.38	0.919	-0.561	0.84	0.593	9.93	5.59	1.28	1.18	-2.8	-3.06
cg00124095	3	72305082		NA	3	brown	-4.06	11.1	17.3	5.51	-9.41	6.45	-7.9	0.193	-2.1	-4.32	5.79	1.62	-1.62	9.25	0.172	13.1	0.402	7.19	-2.2	0.182	-2.85	4.57	0.013	4.9	3.62	8.59	-0.709	4.65	8.13	5.81	0.91	0.365	2.77	-0.305	0.284	1.7	-0.318	9.24	2.12	1.54	2.07	-0.589	-2.67
cg00124133	15	89476436		NA	2	blue	-1.24	24.1	13.2	14.3	-10.3	3.78	-5.96	-0.0493	-6.19	-15	3.09	-8.76	0.926	0.0691	-0.996	12.1	2.08	5.38	-0.78	-5.83	-1.14	2.25	-6.56	4.17	3.36	5.04	2.36	-0.00109	1.85	4.37	1.37	-0.747	0.828	-0.245	-1.77	1.01	0.57	11.9	7.71	-0.524	-1.07	-5.94	-3.88
cg00126889	8	42103037		NA	3	brown	-1.98	18.3	20.5	8.76	-13.3	4.95	-9.15	-0.0907	-3.03	-9.2	3.97	-2.25	-1.92	5.95	-0.778	13.3	1.24	8.41	-1.46	-4.36	-1.85	3.21	-2.25	4.19	3.17	6.47	1.32	2.21	4.62	5.02	1.01	-0.607	2.08	0.237	-0.861	1.75	0.231	11.4	4.05	0.705	0.566	-3.45	-3.8
cg00127150	22	22862144	ZNF280B	140883	5	green	-0.924	-7.36	-10.3	0.884	20	3.52	10.9	3.16	-0.13	9.34	2.28	0.68	12.5	-2.38	2.92	-2.16	-2.12	-7.38	1.07	11.5	1.12	3.83	2.68	1.1	-0.701	3.34	-2.32	1.41	1.39	1.96	3.21	3.64	0.463	1.23	1.38	-0.561	0.322	-4.26	0.382	3.35	0.545	2.65	7.12
cg00127408	9	139420471	NOTCH1	4851	3	brown	-0.82	24.2	18.7	13.9	-10.3	4.45	-6.19	0.781	-4.14	-10.7	4.4	-5.24	1.07	3.75	-0.469	15.9	3.55	7.14	-0.342	-3.78	-1.3	2.57	-3.47	6.86	5.14	6.71	2.29	1.82	5.22	5.33	1.67	-0.41	2.37	0.802	-0.512	1.75	1.48	11.8	7.35	0.719	0.917	-4.88	-3.33
cg00128774	4	183859061		NA	8	pink	8.54	1.82	1.02	2.51	4.66	-1.43	8.08	17.4	6.79	3.98	-4.63	2.08	4.83	2.88	1.44	2.66	3.36	5.4	14.9	4.08	11.4	-2.5	9.2	8.64	-3.49	2.87	5.45	5.74	3.93	-4.69	1.93	8.11	0.725	1.89	0.499	0.665	-4.75	-2.98	0.124	0.495	0.896	1.18	1.17
cg00128877	1	47070178	MKNK1;MKNK1;MKNK1;MKNK1;MKNK1	8569	5	green	0.645	-9.78	-3.62	-5.24	11.7	4.51	7.06	3.71	6.69	18	1.69	10.7	5.57	6.57	2.39	-0.61	1.34	-0.29	1.62	14.9	2.5	1.87	10.4	3.54	1.64	3.7	-0.948	6.52	7.42	3.41	0.788	2.17	3.28	3.61	4.63	0.844	0.0367	-7.36	-4.03	4.55	4.54	7.15	6.91
cg00129774	12	56360414	CDK2;SILV;CDK2	1017	3	brown	-2.65	11.5	19.3	6.61	-9.53	6.91	-7.09	0.26	-1.36	-4.45	5.18	0.762	-1.4	8.52	-1.41	14.7	3.05	8.14	-2.07	0.366	-1.86	3.14	0.387	5.57	5.68	7.56	1.18	4.86	9.7	6.44	0.193	-0.524	3.19	1.35	0.694	0.398	1.71	8.16	2.92	0.689	2.28	-1.51	-1.21
cg00130693	1	226110727	PYCR2	29920	2	blue	-1.21	18	9.89	16.2	-5.59	5.26	-3.01	0.272	-6.59	-11.2	3.55	-9.28	4.47	-0.693	-1.3	12.1	1.61	2.85	-0.879	-2.79	-0.924	3.02	-6.38	4.19	3.99	5.52	2.45	0.368	3.14	5.55	2.32	-0.34	-0.492	-1.37	-2.4	0.397	0.437	10.4	7.32	-0.161	-1.66	-6.15	-1.12
cg00132888	13	26599785		NA	2	blue	1.35	20.2	11.3	14.8	-7.14	2.69	-2.14	1.04	-4.05	-12.5	1.45	-8.48	2.28	-0.599	-0.876	11.9	2.32	5.85	1.6	-4.24	0.423	1.82	-5.77	4.7	3.65	3.81	3.93	0.167	3.02	3.93	3.06	0.22	0.741	0.11	-1.27	0.323	0.355	10.7	8.52	-0.476	-0.52	-5.96	-2.55
cg00134210	10	14644132	FAM107B	83641	4	yellow	-2.56	18.7	13.1	15.1	-7.22	5.79	-4.59	1.71	-6.47	-11	4.5	-7.33	3.19	1.22	-0.495	14.9	0.628	3.69	-0.624	-1.83	-0.909	4.19	-4.53	4.6	3.18	7.68	1.15	1.37	4.8	4.99	2.11	1.6	1.68	0.582	-0.555	0.633	0.353	11.7	7.88	0.0463	-0.126	-4.28	-1.8
cg00135038	7	5391419	TNRC18	84629	5	green	0.203	-6.71	-10.1	1.72	21.1	3.24	12.3	4.86	0.44	9.3	1.06	0.456	13.6	-2.71	3.4	-1.64	-1.56	-6.53	2.6	11.5	2.63	2.96	3.33	1.24	-0.736	2.94	-1.78	0.219	1.62	1.08	3.13	5.07	-0.569	1.2	1.2	-0.0915	0.311	-4.59	0.21	3.34	0.714	2.77	6.06
cg00135874	2	210493473	MAP2;MAP2;MAP2;MAP2	4133	5	green	2.1	-4.7	-9.01	1.94	18.3	3.27	12.8	4.18	2.43	8.47	0.779	0.455	12.6	-2.26	2.53	-2.02	-1.45	-3.94	4.1	9.4	2.65	4.03	2.97	2.6	-0.471	2.82	0.614	1.6	0.226	2.75	6.46	4.13	0.439	2.36	1.76	-0.339	0.882	-3.1	1.24	2.81	1.42	3.35	6.65
cg00135888	11	57407543	MIR130A	406919	10	purple	2.18	-10.4	-5.21	-6.02	14.9	3.06	9.37	4.55	8.4	21.7	0.663	11.5	6.08	6.47	2.88	-1.57	1.67	0.237	3.3	16.5	3.35	1.1	11.4	5.07	0.638	3.73	-0.0575	7.56	6.33	2.28	1.53	2.07	3.05	2.98	3.4	0.073	-0.153	-8.19	-3.94	3.63	4.12	8.52	6.19
cg00136173	5	176045746		NA	5	green	0.866	-8.89	-12.8	-0.0622	23.2	1.98	13.3	3.64	1.22	10.4	-0.16	0.836	12.1	-3.52	2.46	-4.02	-1.82	-7.5	2.36	10.8	2.82	2.12	3.26	0.458	-2.14	1.38	-1.03	0.122	-0.0586	0.438	2.86	3.53	-0.277	1.1	1.69	-0.945	-0.645	-6.15	-0.369	2.71	0.333	2.83	6.02
cg00136787	X	153704948		NA	2	blue	-1.35	21.5	12.2	14.1	-9.88	2.91	-5.7	-0.209	-6.68	-14.8	2.72	-9.33	0.995	-0.633	-0.516	11.4	1.61	4.13	-1.03	-5.95	-1.22	1.92	-6.77	3.54	3.24	4.31	1.21	-0.53	1.67	3.53	1.02	-0.684	-0.165	-0.923	-2.83	-0.547	0.23	11.5	7.05	-0.615	-1.9	-6.79	-3.8
cg00137840	4	124301236		NA	2	blue	3.21	18.2	11.5	11	-8.62	1.04	-3.14	2.28	-1.52	-10.3	-0.0131	-6.12	0.263	0.819	-1.03	9.22	2.92	8.09	3.32	-6.02	1.97	0.0866	-2.88	5.2	1.79	2.67	4.96	0.913	1.27	2	2.23	0.0234	0.474	-0.392	-1.61	1.28	-0.295	8.65	5.69	-1.37	-1.05	-5.12	-4.37
cg00137944	1	50798265		NA	5	green	3.85	-7.43	-13.5	0.325	21.4	-0.0527	15.1	4.97	2.68	8.97	-2.3	-0.149	11.5	-4.84	2.74	-5.08	-0.129	-5.76	4.96	7.95	4.87	0.095	3.43	1.17	-1.98	-0.236	0.331	-0.647	-1.82	-0.739	2.86	3.56	-0.646	1.46	1.67	0.165	0.376	-7.23	0.116	2.11	0.314	2.4	4.84
cg00138766	8	27729073	SCARA5	286133	21	darkred	11.3	-0.353	-3.03	0.114	4.35	-5.67	9.01	11	6.95	2.48	-12.9	0.876	2.38	-0.882	0.57	-2.28	3.31	3.26	12.4	0.679	17.5	-7.41	7.42	3.23	-7.27	-2	5.48	2.73	-1.48	-7.19	-2.45	2.99	-1.57	-0.617	-0.148	0.492	-4.06	-6.87	-1.36	-1.44	-1.39	-0.742	-0.711
cg00138804	7	57706707		NA	22	darkgreen	-7.73	0.271	-0.239	2.06	1.4	6.41	-2.23	-2.63	-5.09	-0.365	9.4	-0.943	2.65	-0.339	-2.26	1.91	-9.84	-3.7	-3.57	2.67	-8.61	17.4	-3.54	-2.05	3.52	4.74	-1.05	-1.23	0.962	5.33	13.8	7.73	2.79	2.35	3.73	0.455	0.82	11.8	3.68	-0.449	4.41	-0.631	4.42
cg00140889	12	47159659	SLC38A4;SLC38A4	55089	2	blue	2.32	17.7	11.4	11.6	-7.57	1.76	-3.08	1.22	-2.11	-9.48	0.807	-5.88	1.33	1.06	-0.0542	10.6	4.32	7.34	1.86	-4.38	1.24	-0.29	-3.53	5.33	4.02	3.16	3.96	0.894	2.67	3.23	0.9	-0.886	0.408	-0.288	-1.97	0.315	0.0211	8.38	5.64	-0.549	-0.933	-3.48	-3.48
cg00142925	11	116706562	APOA1	335	10	purple	1.98	-10.8	-5.65	-6.03	13.7	2.73	8.48	3.45	7.46	20.2	-0.0401	10.2	5.79	5.29	2.82	-2.67	2.13	-0.497	2.32	13.5	3.38	-0.0681	10.3	3.3	0.372	2.27	-0.508	6.09	5.05	2.24	0.0648	0.57	1.59	1.78	2.14	-1.39	0.487	-9.82	-5.28	4.14	2.36	8.44	5.89
cg00143809	22	50720552	PLXNB2	23654	2	blue	-0.601	19.8	10.1	15.2	-7.5	2.3	-4.16	-0.129	-6.75	-13.5	2.69	-10.3	2.42	-1.87	-0.632	10.2	2.33	3.49	-0.213	-5.8	-1.35	1.72	-7.4	3.34	4.39	3.1	2.22	-2.32	0.802	3.21	2.06	0.378	-0.754	-1.2	-2.25	0.996	-0.312	12.2	8.34	-0.479	-1.44	-6.6	-3.9
cg00145118	5	141393931	GNPDA1	10007	3	brown	-4.49	12.8	19.1	7.35	-10.4	7.37	-9.42	0.968	-4.09	-5.86	5.95	-0.38	-0.774	7.77	0.112	14.2	2.36	6.03	-2.97	-0.83	-2.32	2.86	-0.504	4.5	4.83	8.56	-1.25	3.72	7.4	5.46	-2.05	0.2	2.05	0.517	-0.602	2.33	-0.0639	8.39	2.13	2.53	0.697	-2.52	-2.39
cg00145352	17	2319906	LOC284009;METT10D	284009	2	blue	-1.81	23.4	11.4	19	-7.47	4.5	-4.07	0.284	-8.23	-14.9	3.59	-11.6	3.76	-1.74	-0.759	12.9	1.64	2.99	-0.954	-4.63	-1.29	2.87	-7.83	3.79	4.02	5.22	1.94	-0.915	2.31	4.73	2.02	0.0224	-0.256	-1.3	-2.83	0.171	0.962	12.2	8.81	-0.154	-2.34	-7.01	-2.84
cg00145732	16	1095673		NA	2	blue	-1.11	21.6	19.6	11.7	-11.1	4.5	-6.29	0.653	-3.45	-10.4	4.15	-4.02	-0.303	4.59	-0.782	16.3	3.67	7.81	-0.468	-3.14	-1.27	2.26	-3	7.19	4.87	6.87	2.37	3.2	6.08	5.16	1.07	-0.858	2.54	0.988	-0.686	1.55	1.19	11.3	6.51	0.445	0.855	-4.57	-3.65
cg00147509	22	48917166	FAM19A5	25817	10	purple	2.42	-9.75	-5	-6.58	11.6	1.87	6.91	4.21	8.11	18.2	-0.835	10.9	4.71	6.03	2.49	-3.76	0.531	0.522	3.23	10.8	4.11	0.285	11.4	2.66	-1.61	2.41	-0.366	5.11	2.76	1.06	0.3	1.62	2.14	1.49	2.88	1.22	-0.907	-8.49	-4.3	2.93	2.8	7.7	5.03
cg00147578	12	120730932		NA	17	grey60	10.9	3.19	2.98	2.75	2.43	-1.76	6.96	7.14	7.54	3.34	-5.58	2.17	3.46	3.44	3.92	3.81	17.4	7	7.77	2.48	10.8	-11.9	6.64	11.3	2.18	0.0227	3.91	6.53	4.19	-0.446	-6.67	-4.16	0.723	1.99	-0.316	-0.393	-0.0742	-8.78	-0.241	3.78	0.0531	1.33	-2.11
cg00148114	7	5468197		NA	10	purple	3.74	-11.2	-7.5	-5.99	16.3	1.41	11.5	4.85	8.85	20.7	-0.944	9.69	6.35	3.97	3.78	-3.54	2.46	-0.505	4.6	13.6	4.5	-0.535	10.6	4.59	-0.0962	1.7	-0.144	6.25	3.85	1.21	1.29	1.53	2.25	2.9	3.08	0.46	0.708	-10.4	-3.39	4.38	3.43	8.11	5.54
cg00151124	15	39847908		NA	2	blue	-4.66	23.4	13.3	16.1	-9.52	5.97	-7.99	-0.573	-9.67	-14.7	5.46	-9.33	2.48	0.37	-0.879	13.2	-0.717	2.4	-3.17	-4.69	-3.19	5.15	-7.56	2.77	3.21	7.33	0.0406	-0.867	2.16	5.26	1.8	0.648	0.214	-1.35	-2.26	0.723	0.225	15	7.5	-0.116	-1.65	-5.9	-2.9
cg00151370	6	16323285	ATXN1;ATXN1	6310	2	blue	-0.68	20.7	11	15.4	-7.14	3.95	-3.48	1.03	-5.93	-12.8	2.53	-8.77	2.88	-0.349	-0.39	12.2	1.32	4.39	0.185	-3.87	-0.161	2.87	-5.95	4.29	2.67	5.37	2.46	0.771	2.83	4.2	2.34	0.34	0.589	-0.606	-1.99	-0.772	0.577	11.5	7.51	-0.462	-1.59	-6.14	-3.18
cg00151571	7	140179449	MKRN1;MKRN1	23608	37	skyblue3	-2.61	1.1	1.5	1.06	-1.37	2.41	-2.06	-7.55	-1.73	-1.33	5.9	-1.47	-0.155	-0.458	0.581	1.65	4.31	-0.253	-5.54	-0.472	-7.05	0.189	-5	-0.0181	10.1	-0.476	-2.45	-0.445	0.027	6.65	-0.429	-6.02	2.09	2.63	-0.664	-2.41	18.2	0.744	2.38	1.96	1.42	1.51	-0.647
cg00151906	1	154548273	CHRNB2	1141	5	green	1.8	-9.92	-16.6	-1.2	20.7	-1.18	13.3	2.37	1.23	8.08	-1.53	-0.916	9.32	-6.72	2.04	-6.93	-0.941	-8.57	2.68	6.87	2.39	-0.0368	1.19	-1.3	-1.36	-2.34	-0.753	-2.12	-2.93	-1.63	2.2	3.03	-1.91	0.42	0.367	-0.934	0.0983	-6.85	-0.788	1.36	-0.635	2.3	4.63
cg00152259	17	34957477	MRM1	79922	5	green	1.49	-7.01	-8.86	-0.119	17.4	2.2	10.6	4.95	2.19	11.2	-0.0219	2.46	12	-0.579	4.07	-2.6	0.617	-5.14	2.8	10.6	3.8	1	5.48	2.62	-0.418	2.86	-1.47	1.91	0.742	1.03	1.12	3.02	-0.648	1.15	1.24	-0.163	0.206	-7.21	-1.34	4	0.586	3.91	5.49
cg00153101	1	2431753	PLCH2	9651	3	brown	-0.595	12.8	17.1	5.68	-10.2	3.92	-6.82	1.03	-0.871	-5.34	2.36	0.522	-2.05	7.84	0.202	11.8	3.31	8.97	-0.549	-1.73	0.288	0.801	0.654	6.38	2.61	6.33	0.827	4.98	6.26	4.12	-1.38	-1.67	1.87	-0.544	-0.837	1.51	0.112	6.88	2.35	1.01	0.539	-1.79	-3.29
cg00154119	15	68174054		NA	8	pink	7.88	1.84	1.23	1.78	3.77	-1.91	7.44	18.3	6.83	3.58	-4.71	2.67	3.45	3.22	1.58	2.49	0.667	5.64	15.7	3.57	10.9	-0.608	9.91	8.18	-5.8	3.7	4.54	5.86	3.47	-5.51	3.72	10	1.87	2.1	2.39	1.83	-4.21	-1.43	1.11	0.181	2.27	0.151	2.51
cg00154957	1	109850562	MYBPHL	343263	4	yellow	-1.94	19.8	9.59	19.6	-5.2	4.91	-2.81	0.645	-8.12	-13.1	3.71	-11.1	5.21	-1.87	-0.597	12.9	0.559	1.87	-0.76	-3.02	-1.05	3.97	-7.38	3.96	2.8	6.13	1.75	-0.848	2.76	4.81	2.84	0.821	0.674	-0.344	-1.86	0.281	0.146	12.4	9.66	0.00912	-1.59	-6.83	-2.3
cg00155879	10	26222849	MYO3A	53904	3	brown	0.64	13.1	17.2	8.07	-6.89	5.74	-3.38	2.38	0.678	-3.63	3.49	0.712	0.865	8.31	1.22	15.5	4.69	10	1.12	1.03	0.853	2.17	1.57	8.62	5.05	7.94	1.76	6.13	9.18	6.44	1.09	-0.537	3.64	2.69	0.418	1.68	1.06	7.12	3.63	2.53	2.07	-1.25	-0.94
cg00156230	7	45073692	CCM2;CCM2;CCM2;CCM2;CCM2	83605	2	blue	-0.0575	20.3	13.1	14	-7.52	4.37	-3.89	1.01	-4.22	-10	3.46	-6.49	2.68	1.79	0.639	12.5	2.98	6.18	0.447	-3.69	-0.529	2.47	-4.02	5.74	4.79	5.49	2	1.29	3.28	5.31	2.16	0.0267	2.32	0.317	-0.903	1.9	1.11	11.1	8.31	1.44	0.419	-5.46	-2.92
cg00156427	11	119294322	THY1	7070	5	green	2.27	-9.03	-12.1	-1.08	22.1	1.54	13.3	4.31	3.12	12.3	-0.769	2.09	11.6	-2.22	2.99	-4.61	-0.00959	-5.66	3.34	10.5	3.77	0.738	4.91	1.98	-1.55	1.06	-0.2	1.44	-0.432	0.433	2.3	2.55	-0.468	1.37	0.709	-0.0259	-0.0978	-8	-1.14	2.75	0.162	4.56	5.16
cg00157043	11	35964907	LDLRAD3	143458	2	blue	-2.24	19.4	12	17.1	-5.81	6.65	-3.44	1	-6.83	-10.6	4.85	-8.36	4.84	0.583	-0.138	14.4	0.854	3.18	-0.949	-1.7	-1.4	4.6	-5.39	4.78	3.69	7.5	1.56	1.08	4.14	6.21	3.04	0.808	1.44	0.42	-1.34	1.13	0.875	12.2	8.55	0.821	-0.558	-6.48	-1.99
cg00157638	1	10963932		NA	4	yellow	-1.34	17.1	13	14.8	-5.02	5.94	-2.53	0.745	-4.6	-8.05	5.24	-5.52	4.64	2.76	-0.306	16.6	2.87	4.43	-0.686	0.489	-1.5	3.92	-3.75	7.56	5.47	8.66	2.24	3.6	7.01	6.87	2.4	-0.2	2.56	0.485	-0.13	0.625	0.991	11.1	8.48	0.662	0.796	-5.78	-1.74
cg00157962	1	109102212	FAM102B	284611	5	green	4.64	-7.15	-10.3	-0.783	18	-0.38	14.3	5.8	4.49	10.7	-3.13	2.01	9.67	-2.09	3.55	-3.88	0.953	-3.71	5.66	8.89	6.23	-0.566	5.93	2.97	-1.89	0.548	0.441	2.86	-0.0459	-0.879	2.23	2.99	0.128	2.44	1.58	-0.361	-0.41	-7.87	-0.518	3.01	0.886	3.42	5.59
cg00158770	8	19271585	CSGALNACT1;CSGALNACT1;CSGALNACT1	55790	5	green	3	-7.79	-10.6	-1.01	20.5	1.56	13.5	5.48	4.12	12	-0.397	2.71	10.6	-1.5	2.17	-3.85	-0.462	-3.89	4.99	10.1	3.93	1.42	5.64	2.51	-1.72	1.61	0.71	1.88	0.321	0.299	3.61	4.04	0.973	1.55	2.3	-0.0157	-0.178	-6.57	-0.362	2.52	1.05	3.84	6.07
cg00160583	1	32167512	COL16A1	1307	2	blue	-1.78	25.3	17.7	13.7	-11.2	4.89	-7.1	0.681	-5.36	-12.3	4.07	-6.16	0.788	2.98	-0.476	15	2.76	6.33	-0.979	-4.44	-1.2	2.46	-4.4	5.99	3.99	6.85	1.58	1.97	3.92	5.17	0.749	-0.687	1.68	0.214	-1.34	1.51	1	11.7	6.98	0.394	-0.254	-5	-3.66
cg00161124	1	234366259	SLC35F3	148641	2	blue	-2.09	22.5	14.4	14.6	-10.5	4.1	-7.24	-0.483	-7.09	-13.8	3.82	-8.43	1.35	0.763	-0.389	12.5	1.51	3.99	-1.89	-5.7	-2.11	2.25	-6.24	3.53	3.47	5.36	1.12	-0.464	2.38	4.37	0.506	-1.12	-0.172	-1.42	-2.71	0.914	0.546	11.4	6.35	0.145	-1.76	-6	-3.92
cg00161791	21	45575014		NA	3	brown	0.181	17.5	17.8	8.5	-10.9	3.5	-5.73	0.995	-1.47	-8.35	2.71	-1.99	-1.67	5.75	-1.08	13.5	3.3	9.23	0.438	-2.75	-0.112	1.85	-1.19	7.82	3.3	6.31	2.97	5.31	5.94	4.56	1.23	-1.11	4.46	2.23	1.55	1.35	0.672	9.87	6.5	-0.16	2.92	-4.11	-2.57
cg00162064	1	44998151	RNF220	55182	3	brown	-2.62	19.8	19.6	10.4	-12.6	5.32	-8.13	-1.07	-4.37	-11	4.55	-3.9	-1.28	4.42	-1.42	14.9	1.7	7.31	-2.29	-3.72	-2.51	3.39	-4.2	4.17	4.55	6.4	1.73	2.41	5.42	5.88	1.22	-1.24	2.07	0.351	-1.11	0.48	0.453	12.2	5.12	0.0276	0.154	-4.21	-3.6
cg00162344	4	8583937	GPR78	27201	2	blue	-1.63	22	16.6	13.6	-9.96	5.36	-6.46	-0.0324	-5.02	-10.9	4.48	-5.89	1.39	3.06	-0.221	14.6	2.59	6.08	-1.37	-3.79	-1.71	3.07	-4.2	5.28	5.09	6.72	1.43	1.66	4.4	6.13	1.33	-0.9	1.63	0.297	-1.49	0.926	1.76	12	6.87	0.606	-0.0583	-3.94	-2.7
cg00163546	18	34971057	BRUNOL4;BRUNOL4;BRUNOL4;BRUNOL4	NA	5	green	0.85	-7.97	-11.7	0.532	23.8	2.27	13.1	5.63	1.34	10.4	0.636	0.899	12.9	-2.91	3.15	-3.13	-0.882	-6.81	3.48	11.3	3.19	1.95	4.27	2.06	-1.43	2.43	-1.37	1.1	0.519	0.0516	2.64	5.01	0.349	2.09	1.87	0.534	-0.238	-6.22	-0.00874	3.01	1.11	2.87	6.36
cg00164282	17	30830732	MYO1D	4642	2	blue	0.331	19.1	10.7	14.5	-7.01	3.51	-3.32	2.73	-4.83	-11.6	1.8	-8.21	2.7	-0.305	0.356	11.5	1.64	4.42	1.66	-3.94	1.25	1.61	-4.24	4.24	2.28	4.8	1.86	0.523	2.31	3.08	1.4	1.68	-0.00996	-0.727	-2.13	0.867	-0.25	10	7.08	0.0121	-1.5	-6.25	-3.39
cg00164458	1	225676425	ENAH;ENAH	55740	5	green	2.86	-6.03	-11.3	1.74	20.9	1.32	14.8	4.51	2.2	8.6	-0.715	-0.523	13.1	-3.98	3.15	-3.06	0.566	-5.43	4.24	9.29	3.74	0.747	2.74	2	-0.172	0.779	0.321	0.689	-0.674	0.648	3.29	3.15	-2.32	0.403	-1.28	-1.67	0.528	-5.8	-0.876	2.8	-1.75	2.85	4.89
cg00164641	16	79030890	WWOX	51741	5	green	4.12	-7.57	-13.2	0.435	23.1	-0.217	17.3	5.55	3.05	9.16	-2.15	0.0802	11.7	-4.64	3.09	-4.2	0.477	-5.49	5.72	9.14	4.93	-0.0267	3.54	2.11	-1.86	-0.172	0.625	0.269	-0.651	-1.22	3.37	3.95	-0.453	1.35	1.72	0.0137	-0.472	-6.96	0.297	2.55	0.637	2.72	5.94
cg00164894	1	55535598	USP24	23358	24	darkgrey	7.63	4.39	5.21	3.41	2	0.844	5.48	7.69	6.86	3.55	-2.28	3.49	3.72	6.47	2.49	6.81	9.82	8.32	7.63	4.92	8.1	-4.16	7.59	17.1	1.4	5.09	5.12	10.3	7.23	1.77	-0.886	-1.64	3.63	2.48	1.58	0.454	0.00033	-3.31	1.66	2.05	2.01	1.42	-1.03
cg00164898	22	50709127	MAPK11	5600	10	purple	2.33	-9.58	-5.09	-5.31	12.8	3.54	8.24	3.82	7.37	18.6	0.635	9.69	5.93	5.17	2.16	-2.25	1.85	-0.0432	2.81	12.4	3.09	1.09	9.87	3.96	0.873	2.55	0.321	5.97	4.83	2.85	1.7	1.44	3.01	3.98	3.4	0.743	0.443	-8.12	-3.31	3.4	4	7.04	5.18
cg00165067	13	52030692		NA	8	pink	6.11	1.24	1.44	0.834	3.7	-0.843	5.77	17.4	6.21	4.4	-4.44	4.26	3.27	4.65	1.73	2.2	1.34	5.13	12.6	4.42	11.7	-1.74	11.5	7.74	-5.76	4.64	3.12	6.93	3.34	-5	0.316	8.43	2.22	1.77	2.47	2.12	-4.17	-2.77	0.165	0.596	2.47	0.777	1.26
cg00165078	1	94799132		NA	2	blue	-1.41	22	12.3	15	-7.99	4.17	-4.84	0.373	-6.08	-12.1	3.9	-8.22	2.71	0.522	-1.02	12.1	0.303	4.9	-0.342	-4.31	-1.55	4.09	-5.85	3.95	2.77	6.01	2.55	0.138	2.01	4.64	3.28	0.59	0.518	-1.08	-2.16	0.614	-0.0409	13.8	8.2	-0.434	-1.23	-5.51	-2.99
cg00165631	1	201159988	IGFN1;IGFN1	91156	3	brown	-2.53	14.1	20.9	7.2	-11.2	5.99	-8.5	1.29	-2.24	-6.39	4.01	-0.153	-1.68	8.19	-0.675	14.6	2.24	8.52	-1.6	-1.22	-0.781	2.37	0.167	5.11	3.47	8.19	0.967	4.45	7.9	5.1	-1.29	-0.455	2.82	0.231	-0.0789	2.14	-0.0933	8.25	2.84	0.876	1.22	-1.44	-2.08
cg00168634	4	154572830		NA	3	brown	-2.36	14.2	18.3	7.16	-10	5.87	-8.01	0.817	-2.48	-5.79	4.1	-0.337	-0.683	8.16	-1.18	13	2.67	8.13	-1.83	-1.33	-0.616	2.22	-0.0572	5.81	3.21	8.27	1.34	5.94	6.91	5.68	-1.49	-1.69	1.91	-0.557	-1.54	0.709	0.0669	7.68	2.52	-0.308	-0.236	-0.778	-3.29
cg00168694	21	40193056	ETS2	2114	7	black	4.57	-8.26	-10.7	-1.51	20.4	-0.346	16.9	5.81	5.66	11.5	-1.93	3.02	9.23	-1.79	3.71	-3.76	0.434	-3.11	6.34	10.3	4.92	0.584	5.85	2.41	-0.958	0.167	0.496	2.09	1.19	-0.878	4.25	4.54	0.135	2.09	2.03	0.622	-0.0531	-6.69	-0.718	3.39	1.83	3.96	5.78
cg00168942	10	35894430	GJD4;GJD4	219770	7	black	5.18	-8.39	-11	-1.48	21.3	-0.0711	17.7	4.45	6.11	11.4	-2.04	2.6	9.3	-2.1	2.56	-3.81	1.99	-2.93	5.71	10.5	4.82	-0.544	5.02	3.23	-0.061	-0.209	1.69	2.88	1.11	0.468	3.31	2.05	-0.0181	1.88	1.19	-0.591	0.388	-8.06	-1.5	2.5	0.763	4.14	5.21
cg00169111	1	36639894	MAP7D1	55700	4	yellow	-2.17	14.8	7.42	18.2	-2.09	5.86	-1.21	2.39	-7.37	-9.31	4.47	-9.13	7.31	-1.32	0.9	13	1.07	0.386	-0.43	-0.0167	-0.431	4.08	-5.01	4.8	3.52	7.45	-0.0112	-0.535	5.05	4.86	1.99	2.25	0.441	0.0564	-0.774	1.23	1.26	9.28	7.81	1.45	-0.833	-6.47	-0.908
cg00171092	3	124531371	ITGB5	3693	7	black	3.86	-10.4	-9.42	-4.13	17.3	0.88	13.8	3.85	6.98	14.7	-1.22	6.43	7.08	0.904	2.54	-3.92	0.755	-2.1	4.43	11.8	3.93	0.335	7.47	2.64	-0.688	0.697	0.626	3.77	2.47	0.9	2.82	1.87	2.08	3.45	3.69	-0.146	0.474	-8.47	-2.07	2.1	3.34	5.75	5.9
cg00171729	6	52416856	TRAM2	9697	3	brown	-3.15	15.3	19.4	8.45	-11.7	5.63	-8.85	-0.151	-3.39	-7.84	4.59	-1.24	-1.32	6.78	-0.476	14.3	0.759	7.45	-2.19	-2.41	-2.26	4.17	-1.71	4.03	3.4	7.61	0.631	1.83	6.5	5.52	0.959	0.00837	2.88	0.41	-0.069	2.03	0.0842	11.7	4.49	0.713	0.886	-3.07	-2.61
cg00171942	1	34088611	CSMD2	114784	2	blue	1.09	17.2	10.1	14.3	-4.65	3.48	-1.58	8.53	-3.51	-8.78	1.56	-6.57	4.17	0.951	0.112	11.8	2.42	4.76	4.92	-2.15	3.61	0.846	-0.93	6.69	0.609	6.53	3.05	1.67	3.48	0.352	0.725	5.25	0.104	-0.873	-1.45	2.63	-2.5	7.77	5.96	0.389	-1.11	-5.7	-2.81
cg00172872	12	89461426		NA	5	green	3	-7.87	-10.7	-0.701	19.9	0.563	14.5	4.59	3.9	10.5	-1.06	2.14	10.1	-2	2.61	-3.32	-0.686	-4.17	4.64	10.5	3.83	1.47	4.72	2.27	-1.25	1.21	0.314	1.62	1.18	0.124	3.94	3.53	-0.363	1.38	1.29	-0.475	0.289	-6.04	-1.15	2.33	1.04	3.4	5.77
cg00174179	3	49450293	RHOA;TCTA	NA	5	green	0.714	-12.3	-7.77	-5.5	17.6	3.13	10.4	4.09	5.96	19.4	1.05	9.03	7.27	3.71	3.3	-2.42	0.274	-2.91	2.12	16.7	2.66	1.53	9.57	3.34	-0.851	3.6	-1.88	5.42	5.5	1.61	0.993	2.03	2.47	2.76	3.95	0.433	0.458	-9.18	-3.49	3.33	3.67	7.2	6.2
cg00174500	14	23846479	CMTM5;CMTM5	116173	3	brown	-0.0935	15.7	20.5	7.26	-12.1	3.56	-7.18	1.2	-0.72	-7.09	2.16	-0.294	-2.25	7.7	-0.209	13.4	4.07	10.1	-0.102	-2.91	0.633	0.45	0.179	6.44	2.66	6.2	1.67	4.51	6.33	4.02	-1.26	-1.96	2.7	0.996	-0.623	1.22	0.352	7.26	3.77	0.637	0.889	-1.72	-3.45
cg00174573	12	125172635		NA	3	brown	-0.0998	14.5	22.9	5.5	-14.4	3.17	-8.51	0.293	-0.0894	-6.8	1.86	0.804	-4.47	8.38	-0.347	13	4.63	10.9	-0.725	-3.32	0.157	-0.388	0.424	5.73	3.63	4.97	1.46	5.03	7.01	3.89	-2.14	-2.64	2.62	1.06	-0.181	1.46	0.0405	6.69	2.18	0.486	1.51	-2.98	-4.57
cg00174718	6	47136110		NA	5	green	0.443	-11.6	-5.35	-7.03	13.2	3.97	8.45	2.89	7.6	19.3	1.76	12.1	4.41	6.3	1.61	-1.75	-1.16	-0.14	2.06	16.1	1.37	3.61	9.78	2.51	0.122	3.85	-0.643	6.82	6.67	3.03	3.13	2.73	3.85	3.71	4.98	-0.487	0.695	-6.09	-4.26	3.6	4.73	8.87	7.59
cg00175403	1	12223543		NA	3	brown	-1.85	15.7	20.9	9.04	-8.97	6.35	-6.12	0.995	-1.51	-5.85	5.45	-0.295	-0.222	8.55	0.1	17.3	3.27	9.34	-0.885	0.403	-1.45	3.59	-0.0675	8.01	5.51	9.72	1.36	5.59	9.93	6.77	0.776	-0.304	3.8	1.09	0.247	1.65	1.51	10.5	4.39	1.54	1.88	-1.89	-2.04
cg00175441	17	76100646	TNRC6C;TNRC6C	57690	5	green	1.86	-4.53	-8.78	2.71	18.1	2.22	13.2	4.9	1.17	6.78	0.43	-0.741	12.3	-3.15	2.29	-0.87	-0.989	-5.01	4.03	9.53	3.22	2.78	2.79	3.25	-1.33	2.81	0.428	0.524	1.26	0.983	4.78	4.37	0.229	1.12	1.62	-0.176	-0.58	-2.89	1.96	2.31	0.747	-0.379	5.28
cg00178359	16	56659460	MT1E	4493	17	grey60	9.92	4.96	5.83	2.71	-1.11	-2.19	4	5.16	7.17	0.891	-5.9	1.86	0.464	4.2	2.69	5.12	18.2	9.26	6.13	0.737	9.7	-13.1	5.41	10	2.51	-0.353	4.21	6.37	5.29	-0.172	-8.71	-6.02	1.15	1.24	-0.536	0.283	-0.474	-7.02	0.208	1.67	-0.136	0.809	-4.03
cg00179374	7	132259150	PLXNA4;PLXNA4;PLXNA4	91584	5	green	3.55	-12.3	-11.5	-4.81	19.7	-0.0491	14.1	4.22	6.51	15.7	-2.1	5.8	7.19	-0.172	2.92	-5.55	0.412	-3.38	4.44	11.4	4.45	0.0964	7.4	1.92	-1.52	-0.0375	-0.228	2.87	1.57	-0.362	2.42	2.57	1.11	2.61	2.72	0.0266	0.384	-9.47	-2.39	2.95	1.99	5.42	6.38
cg00179795	10	131695114	EBF3	253738	4	yellow	-1.46	15.2	7.28	19.3	-1.64	5.9	-0.404	1.72	-6.73	-8.87	4.02	-9.65	8.19	-1.46	-0.16	12.7	0.309	1.31	-0.0984	0.15	-0.326	4.96	-5.41	4.3	3.32	7.18	1.85	-0.655	4.22	5.59	3.75	2.13	0.85	-0.537	-1.02	0.582	0.257	11.4	10.1	0.341	-0.942	-5.9	0.454
cg00180097	6	31601157	BAT2	NA	5	green	0.623	-7.68	-9.02	-0.643	17.4	3.06	10.5	3.57	2.18	11.1	0.432	2.81	10.6	-0.834	3.58	-2.59	-0.822	-4.95	1.83	10.8	2.67	2.42	4.64	1.34	-0.842	2.45	-1.71	0.608	0.998	1.7	2.44	3.12	1.04	2.15	2.22	0.639	0.186	-5.4	-0.528	4.26	1.47	3.2	5.64
cg00183888	7	155276880		NA	2	blue	-0.593	18.9	15.9	12.4	-7.76	4.98	-4.27	2.16	-3.1	-8.49	4.22	-3.98	1.91	4.17	0.661	15.6	4.22	7.11	0.505	-1.47	-0.26	2.29	-2.27	7.8	4.82	7.79	1.69	3.17	6.15	5.09	1.07	0.316	2.96	1.73	0.00387	0.779	0.994	9.82	6.37	1.19	1.29	-3.83	-3.18
cg00184452	1	50887477	DMRTA2	63950	10	purple	2.24	-14	-8.41	-7.43	17.4	1.92	10.2	3.58	8.07	23	-0.076	10.6	5.81	4.21	2.64	-4.34	0.977	-1.72	2.89	14.4	3.15	0.541	10.4	2.96	-0.445	1.81	-0.669	5.4	4.11	1.32	0.967	1.52	2.19	2.91	3.27	0.353	0.00501	-10.2	-4.61	3.43	3.57	8.93	6.82
cg00185066	13	80910763	SPRY2	10253	5	green	6.68	-7.49	-11.2	-0.982	17.7	-1.5	17	5.55	6.12	10.3	-3.65	1.66	9.11	-3.15	3.37	-4.49	1.59	-2.79	7.38	7.7	5.98	-1.48	5.18	2.71	-1.49	-1.35	2	0.951	-0.708	-1.2	3.31	2.56	-0.767	1.33	0.98	-0.565	0.631	-8.2	-1.02	2.98	0.0935	2.41	4.98
cg00186909	12	93129288	PLEKHG7	440107	3	brown	-0.355	11.8	18.7	4.25	-11.6	4.01	-7.76	0.382	0.456	-4.35	2.42	1.9	-3.5	9.05	-0.216	10.6	2.57	10.4	-0.539	-2.33	-0.377	1.62	1.18	4.62	3.4	5.54	1.78	4.17	6.4	4.45	0.003	-1.2	1.81	-0.197	-0.388	2.21	0.444	7.28	1.42	0.895	1.22	-1.57	-3.85
cg00187465	1	52830898	CC2D1B	200014	2	blue	-4.62	19.4	10.5	19.1	-5.24	7.26	-4.8	0.377	-9.72	-11.4	6.65	-9.6	6.17	-0.0749	0.157	14.5	0.155	0.868	-2.71	-1.55	-2.89	5.55	-6.93	4.22	3.89	8.87	-0.26	-0.148	3.57	6.27	2.22	1.14	-0.023	-1.23	-2.77	0.252	1	13.1	8.33	0.988	-1.96	-5.9	-1.58
cg00187503	18	74729519	MBP;MBP;MBP;MBP;MBP;MBP	4155	2	blue	-2.27	23.1	13.7	14.8	-10.1	4.14	-6.03	0.354	-7.23	-15.3	3.48	-8.89	1.17	-0.0244	-0.875	13.2	0.577	4.11	-1	-5.08	-1.41	3.32	-6.67	3.4	2.79	5.62	1.56	-0.33	2.49	3.91	1.85	0.53	1	-0.313	-1.45	0.78	0.327	13.3	7.79	-0.514	-1.14	-7.28	-3.96
cg00187692	13	52199954	WDFY2	115825	2	blue	-2.78	22	15.5	14.2	-10.1	5.09	-6.68	-0.00759	-6.84	-12.7	4.71	-7.36	1.42	1.64	-0.177	14.4	1.6	4.43	-1.75	-4.15	-2.36	3.23	-5.74	4.02	4.76	6.23	0.69	0.66	3.75	5.01	1.27	0.257	0.877	-0.305	-1.77	0.636	1.41	12.8	6.97	0.429	-0.286	-5.8	-2.69
cg00190412	6	10836303		NA	2	blue	-1.46	22.1	13.9	13.8	-9.6	3.34	-5	0.137	-5.97	-13.7	3.53	-7.77	0.815	0.775	-0.76	13.5	1.16	5.21	-0.482	-4.48	-1.69	3.05	-6.11	4.49	3.39	5.43	2.19	0.872	3.94	3.98	2.3	-0.0599	0.73	-0.894	-1.55	-0.0325	-0.0927	12.9	7.06	-0.376	-1.01	-5.82	-3.19
cg00190545	17	37073701	LASP1	3927	5	green	3.18	-7.51	-11.8	0.414	23	0.813	16.1	5.08	2.87	9.72	-1.78	0.878	11.9	-3.34	3.1	-3.26	0.637	-5.23	4.34	10.4	4.94	0.151	4.2	2.28	-0.991	0.92	0.345	0.86	0.602	-0.237	2.28	3.22	-0.11	1.79	1.73	-0.386	-0.0974	-7.05	-0.236	2.3	1.1	3.17	5.59
cg00190795	3	195599898	TNK2;TNK2	10188	5	green	2.76	-5.16	-9.21	2.66	22.1	2.97	14.3	4.74	2.09	9.87	0.967	0.277	15.5	-2.39	2.99	-0.846	1.41	-4.77	3.86	11.5	3.08	1.76	3.5	4.63	1.15	3.04	0.601	1.32	1.28	2.47	3.79	2.89	-0.0841	1.13	1.42	0.512	1.57	-5.15	0.866	3.66	1.04	2.59	6.17
cg00191957	6	43476766	C6orf154	NA	5	green	2.67	-9.07	-8.4	-2.49	19.2	2.64	12.9	3.46	5.84	15.4	0.568	5.75	9.31	1.43	3.12	-2.01	1.89	-2.77	3.24	14.2	2.95	0.941	7.01	4.99	1.04	2.73	0.0187	5.86	3.74	2.81	2.58	1.02	2.29	2.99	3.27	0.145	1.11	-8.07	-1.12	3.47	3.16	5.65	6.4
cg00192031	7	47620790		NA	4	yellow	-1.68	18	11.2	17.7	-4.85	5.04	-2.7	1.52	-6.64	-10.1	4.13	-8.69	5.26	0.13	0.847	14.7	3.3	2.59	-0.712	-1.49	-0.555	2.42	-5.02	5.7	4.98	6.66	0.981	0.93	5.23	4.92	0.997	0.319	-0.864	-0.976	-3.28	-0.681	1.43	9.26	6.62	2.05	-2.43	-5.08	-1.74
cg00192882	17	19291120	MFAP4	4239	2	blue	-3.03	17.4	21.3	9.28	-12.5	6.25	-9.02	-1.01	-3.66	-8.65	5.39	-1.92	-1.29	6.66	-0.212	15.3	2.68	7.71	-2.77	-2.6	-2.9	3.09	-2.71	5.08	5.82	7.37	0.367	2.71	6.55	6.77	0.0651	-1.44	3	1.04	-0.209	1.45	1.08	11.3	4.86	1.64	1.88	-2.8	-2.52
cg00193283	3	10806047	LOC285370	NA	3	brown	2.21	17.2	13.3	8.41	-13.7	-1.22	-6.93	0.0423	-2.4	-12.9	-0.626	-6.14	-3.52	0.6	-0.885	7.73	6.58	7.48	0.8	-9.63	0.937	-4.02	-4.12	3.78	3.64	-0.0995	2.85	-0.273	0.153	0.374	-2.96	-2.86	-0.394	-0.408	-2.77	1.08	0.598	6.13	4.59	-1.12	-1.16	-5.36	-6.93
cg00194044	3	128141434		NA	8	pink	4.63	0.377	-1.18	1.18	4.34	-1.52	5.51	17.2	3.12	2.56	-5.88	1.68	3.71	1.64	0.254	0.206	-2.21	1.53	11.7	3	11.8	-0.686	8.68	3.53	-9.55	3.47	2.73	3.83	1.1	-7.34	0.48	11	-0.46	-0.256	0.634	1.37	-5.87	-2.17	-0.426	-1.53	-0.0972	0.0262	1.51
cg00195561	11	46408584	CHRM4	1132	8	pink	5.14	0.362	-0.26	1.16	5.22	-0.716	6.68	19.3	4.9	4.4	-2.84	2.85	4.51	2.85	0.258	1.38	-0.891	3.13	13.4	4.16	9.21	0.222	9.92	6.08	-6.04	4.03	3.74	4.97	2.61	-6.04	2.91	12.7	0.624	0.779	1.35	2.33	-4.81	-1.75	-0.653	0.556	0.997	0.546	2.65
cg00196151	3	195563279		NA	5	green	2.52	-5.14	-8.87	1.91	18.9	1.78	14	5.78	2.16	8.96	-1.19	1.04	12.6	-1.73	2.66	-1.2	-0.35	-4.47	4.33	10.9	5.23	1.8	4.77	3.48	-2.12	3.02	0.349	2.68	1.84	0.607	3.19	3.73	-0.549	0.5	0.841	-1.3	-0.655	-5.09	0.0497	3.05	0.0972	1.88	6.89
cg00196474	3	71702735		NA	7	black	6.62	-5.48	-10.4	0.943	18.2	-1.9	18.3	6.18	4.98	7.77	-4.03	-0.0705	10.1	-3.91	2.79	-3.12	1.27	-2.6	7.71	7.57	6.85	-0.879	4.01	3.27	-2.08	-0.628	2.36	0.672	-0.103	-1.58	3.94	3.57	-0.674	1.99	0.778	-1.2	-0.697	-5.97	0.379	1.5	0.692	2.63	4.58
cg00198141	6	168449330		NA	2	blue	-1.93	26.7	12.8	17	-9.6	4.11	-5.35	-0.357	-7.99	-16.3	4.24	-10.6	2.04	-0.969	-0.845	12.7	1.56	3.87	-1.11	-5.8	-2.21	3.38	-8.15	4.51	4.03	5.25	1.96	-0.377	1.57	4.78	2.78	-0.202	0.726	0.0244	-1.97	0.495	1.04	13.8	8.78	-0.283	-0.809	-6.77	-3.95
cg00198586	3	123861151	KALRN;KALRN;KALRN	8997	5	green	3.14	-5.49	-10.1	2.46	21.7	1.9	16	5.33	2.66	8.61	0.151	-0.1	13.3	-3.2	3.44	-1.55	0.635	-4.6	5.1	10.7	3.64	1.69	3.25	2.85	0.549	1.6	0.326	1.35	1.44	1.05	4.34	4.48	0.038	2.12	1.63	-0.158	0.502	-4.75	1.14	4.04	0.889	2.36	6.86
cg00198594	3	192734341		NA	3	brown	1.85	10.2	19.1	2.84	-8.8	4.26	-4.4	2.02	4.15	-1.14	1.56	5.22	-2.94	12.8	-0.121	11.5	3.79	14.8	1.87	0.85	1.65	1.58	4.34	7.26	3.8	6.74	3.7	8.37	9.74	5.48	0.974	-0.942	5.12	2.26	2.18	0.897	-0.114	5.78	1.89	1.03	3.62	1.24	-1.53
cg00199000	16	89350310	ANKRD11	29123	2	blue	1.88	21.9	11.6	14.6	-7.74	2.08	-2.44	1.45	-3.7	-12.5	0.833	-8.32	2.12	-0.209	-0.865	11.7	2.68	6.49	1.99	-4.74	1.18	1.21	-5.18	5.32	2.72	4.11	4.31	0.907	2.52	3.24	2.59	-0.293	0.0708	-0.6	-2.21	0.25	-0.0873	10.3	7.57	-0.964	-1.28	-5.64	-3.34
cg00200667	17	46753282		NA	8	pink	5.39	4.98	4.02	4.94	2.65	1.63	5.31	18.4	4.04	1.9	-1.82	1.61	5.2	4.3	1.76	6.14	1.7	5.69	12.4	4.3	9.04	0.589	8.16	9.39	-3.52	6.69	3.71	6.43	5.48	-2.85	2.86	9.83	2.97	2.99	2.29	2.35	-4.74	0.566	2.77	1.38	1.95	-0.361	1.31
cg00200734	9	970379		NA	10	purple	1.75	-11.4	-3.97	-10.1	8.71	1.52	5.47	2.44	9.42	18.9	0.454	15.1	1.15	8.06	2.29	-3.85	-0.208	1.51	2.39	10.7	1.78	2.06	11.6	3.11	-0.452	2.15	-0.621	7.36	4.13	1.62	2.36	1.61	4.87	5.46	5.36	0.934	1.02	-6.86	-4.6	3.11	6.49	9.63	6
cg00201468	9	88137984		NA	10	purple	3.02	-13	-7.76	-8.33	13.5	0.837	8.52	3.03	8.65	20.3	-1.34	10.3	4	3.94	2.58	-5.75	1.7	-0.576	2.85	10.7	3.61	-1.15	10	1.97	-0.831	-0.0684	-0.213	4.78	1.89	0.531	-0.0449	0.346	1.56	2.17	2.04	0.429	-0.0945	-11.1	-5.39	2.85	2.46	8.39	4.22
cg00202829	15	74609868	CCDC33;CCDC33	80125	3	brown	-2.9	13.2	24.1	4.93	-12.8	6.13	-9.6	0.925	-1.14	-5.63	4.59	2.09	-3.69	10.7	-0.72	14	1.73	10.1	-1.58	-1.04	-1.45	3.13	1.1	5.61	3.22	8.7	0.662	6.34	8.73	5.24	-0.555	-0.381	3.34	0.908	0.186	1.07	-0.429	8.81	1.82	0.728	1.83	-1.14	-2.94
cg00203564	3	176133845		NA	3	brown	2.74	18	15.9	8.25	-12.4	1.22	-5.66	1.13	-0.0026	-9.79	-0.225	-3.2	-2.58	3.65	-0.953	10.7	4.69	11.1	2.01	-5.86	1.73	-1.26	-1.85	5.7	2.63	3.02	4.62	2.07	2.94	2.78	-0.473	-2.33	1.74	0.582	-1.27	1.46	-0.236	7.32	4.51	-1.19	-0.604	-2.76	-5.34
cg00205436	2	132766767		NA	22	darkgreen	-11.2	3.85	3.61	5.81	0.352	12.2	-4.9	-0.642	-8.23	-1.39	12.6	-1.63	5.5	2.58	-0.868	6.68	-9.53	-3.17	-5.42	4.41	-7.93	19.2	-2.55	0.468	2.05	11.8	-2.73	1.21	4.24	8.11	8.4	6.04	4.29	1.88	2.2	1.25	-0.333	11.9	4.56	1.71	1.84	-1.03	3.72
cg00205605	1	2516401		NA	5	green	-0.166	-8.57	-10	-0.276	22.3	3.77	12	3.98	1.59	11.9	1.94	2.65	12.1	-0.944	2.38	-1.89	-1.39	-6.21	1.94	13.9	1.78	3.57	4.44	2.48	-0.355	3.83	-1.44	2.59	2.86	2.05	3.3	3.89	0.877	1.77	2.51	-0.31	0.843	-5.36	-0.317	2.62	1.7	4.16	7.14
cg00205658	7	120628002	C7orf58;C7orf58	NA	3	brown	-3.5	9.25	17.7	4.42	-8.66	8.63	-8.04	0.321	-1.16	-2.49	5.43	3.04	-1.52	10.6	-1.02	12.5	1.89	8	-2.84	1.41	-1.66	3.69	1.82	5.11	4	9.02	0.114	6.19	9.32	7.29	-0.818	-0.885	4.48	1.74	1.7	2.08	0.332	6.77	2.11	1.34	2.9	0.354	-1.15
cg00206161	16	89966879	TCF25	22980	5	green	1.44	-6.37	-10.2	1.28	19.8	1.89	12.6	3.75	1.66	8.86	0.635	0.289	12.5	-2.86	3.7	-2.34	0.247	-5.7	2.8	10.1	2.58	1.61	3.19	2.69	-0.13	2.05	-1.41	0.634	0.444	1.5	2.96	2.56	-0.704	1.23	0.327	-0.211	1.27	-5.6	0.00188	3.36	-0.0794	2.9	5.06
cg00206999	3	58222569	ABHD6	57406	3	brown	-3.03	11.4	21.2	4.4	-12.8	5.4	-9.91	-0.966	-1.39	-5.06	4.36	2.01	-3.86	10	-1.87	12.8	1.68	8.71	-3.11	-1.21	-2.28	2.74	0.529	4.58	3.56	7.38	0.718	5.36	8.29	5.53	-0.959	-2.14	3.58	0.95	0.656	0.699	0.111	8.18	2.57	-0.312	1.84	-1.01	-2.24
cg00207280	8	126441393	TRIB1	10221	5	green	2.06	-7	-9.51	0.204	19	2.56	11.6	4.3	2.58	11.9	0.299	1.92	12.4	-1.35	3.77	-2.76	0.812	-4.8	3.18	10.5	3.22	1.24	4.72	2.6	0.438	1.67	-0.352	1.76	0.994	1.65	2.57	3	0.758	1.58	1.99	-0.31	-0.546	-6.42	0.384	3.93	1.08	4.22	6.26
cg00207890	16	1098059		NA	2	blue	-1.18	21.3	14.3	12.5	-9.88	4.11	-6.07	0.578	-5.07	-11.9	3.65	-6.2	0.736	2.15	-0.205	12.6	2.74	5.79	-0.581	-4.61	-1.12	2.2	-4.53	5.85	3.98	5.78	1.39	1.97	2.99	4.43	1.19	-0.545	2.25	1.06	-0.636	2.16	1.23	11.2	7.29	-0.074	1.09	-4.99	-3.72
cg00207921	1	1098992		NA	8	pink	4.38	-0.108	0.864	0.353	4.58	1.02	5.15	17.1	5.14	5.34	-3.38	4.49	3.73	4.71	0.659	1.99	-0.207	3.72	10.9	5.71	10.5	0.0634	11.4	5.57	-5.13	5.21	2.76	6.09	4.13	-4.17	0.693	11.1	1.15	1.67	1.63	1.98	-5.15	-2.19	-1.75	-0.0493	1.69	1.48	2.3
cg00210098	3	12883308	SNORA7A;RPL32;RPL32;RPL32	NA	11	greenyellow	-14.4	1.22	1.87	3.75	0.457	11.6	-5.63	-2.58	-9.09	-0.804	18	-1.31	3.95	1.46	0.771	4.71	-6.78	-5.58	-7.4	4.2	-12.6	13.3	-4.12	-1.38	4.79	8	-6.5	-0.3	3.24	7.46	5.2	4.57	2.52	1.63	1.85	1.39	1.42	8	2.4	3.98	2.69	-1	3.31
cg00210127	16	12352233	SNX29	92017	2	blue	-1.04	20.3	12.2	14.1	-7.91	4.03	-4.47	0.364	-5.52	-11.8	3.51	-7.56	2.42	0.76	-0.833	11.6	1.42	4.69	-0.462	-4.22	-1.14	2.83	-5.54	4.3	2.82	5.59	2.31	0.365	2.44	4.58	1.94	-0.237	1.26	-0.529	-0.629	1.87	1.21	11.4	8.65	-0.563	-0.105	-5.21	-3.06
cg00210562	15	89914046		NA	5	green	3.66	-17.4	-12	-9.73	15.8	-1.51	11	2.62	8.54	19	-2.88	8.92	3.1	0.94	2.31	-8.16	1.02	-2.59	3.5	9.89	3.82	-1.88	8.54	0.0953	-1.47	-2.51	-0.3	2.8	0.674	-1.7	0.362	1.28	0.551	1.92	2.49	-0.883	-0.307	-12.2	-5.46	2.21	2.23	7.71	5.21
cg00211115	11	69257736		NA	3	brown	-1.31	19.1	19.5	9.01	-14.5	3.77	-9.47	0.455	-3.65	-10.8	3.24	-3.45	-2.33	4.77	-1.17	12.4	2.21	7.78	-0.947	-5.78	-1.34	1.84	-2.79	4.69	3.21	5.28	1.67	2.15	3.73	3.78	0.309	-0.79	1.52	-0.0389	-1.01	2.1	0.169	10.5	4.36	-0.0833	0.279	-4.04	-4
cg00211403	12	108525241	WSCD2	9671	5	green	4.01	-12.1	-10.6	-5.29	19.3	0.406	14.5	4.28	7.67	16.6	-1.87	6.85	6.56	0.603	2.86	-4.58	1.1	-2.34	4.84	12.6	4.44	-0.136	8.03	2.57	-0.612	0.119	0.338	3.94	2.55	0.244	2.46	2.42	1.86	3.18	3.64	0.0384	0.221	-9.21	-2.62	2.94	2.99	5.85	6.51
cg00211609	1	1178039	FAM132A	388581	2	blue	-2.23	25.8	15.1	16.5	-9.51	5.35	-5.9	-0.221	-7.09	-13.9	5.18	-8.54	2.37	1.02	-0.991	14.9	1.79	4.51	-1.44	-4.28	-2.58	4.01	-6.65	5.33	4.93	6.81	2.08	0.712	3.54	6.07	2.67	-0.363	1.21	-0.372	-1.3	0.26	1.65	13.6	8.54	-0.111	-0.603	-5.97	-2.85
cg00213295	17	32925561	TMEM132E	124842	2	blue	-1.4	22.5	13.1	14.6	-9.73	3.72	-5.89	3.69	-6.4	-14.1	2.38	-8.38	1.35	0.279	-1.12	12.5	0.676	4.24	1.06	-5.27	0.69	2.09	-4.44	3.87	0.799	5.86	1.91	-0.0629	2.21	1.64	0.478	2.77	0.395	-0.986	-1.58	2.14	-1.49	11.2	6.92	-0.982	-1.3	-7.32	-4.72
cg00214171	17	73642991	RECQL5;LOC100130933	9400	2	blue	-1.96	27.1	14.9	16	-10.5	4.32	-6.43	0.268	-7.16	-15.1	4.06	-8.94	1.56	0.491	-0.909	13.3	1.33	4.54	-0.936	-5.74	-1.82	3.14	-6.64	4.16	3.83	5.66	1.88	0.0958	2.31	4.43	1.97	0.247	0.719	-0.53	-1.72	0.652	0.573	13.4	8.1	-0.183	-1.07	-6.86	-3.44
cg00214780	11	47585888	PTPMT1;PTPMT1	114971	8	pink	2.23	2.06	2.13	3.8	5.14	4.02	4.63	17.2	2.43	4.47	-0.125	2.56	7.31	4.8	2.51	4.81	-0.098	2.53	8.87	6.75	7.96	1.6	9.18	7.26	-4.7	8.24	0.971	5.5	5.46	-1.73	0.877	9.72	1.42	1.33	0.939	3.34	-4.97	-1.37	-0.187	2.88	0.966	0.862	1.38
cg00215611	2	219860717		NA	3	brown	-1.35	13.1	23.3	5.23	-12.4	4.87	-8.54	0.251	-0.317	-5.14	3.85	2.13	-3.29	10.6	-1.02	14.3	2.85	10.7	-1.2	-1.34	-1.25	2.31	0.917	6.46	3.89	7.47	1.84	5.7	8.69	5.41	-0.149	-1.51	3.94	1.13	1.05	0.217	0.254	8.37	2.57	0.559	2.18	-0.532	-2.06
cg00216061	16	88547579	ZFPM1	161882	2	blue	-2.41	23.3	12	18.8	-7.32	5.24	-4.29	-0.634	-8.27	-14.7	4.99	-10.6	3.59	-0.976	-0.732	14.4	1.11	3.07	-1.59	-3.76	-2.69	4.56	-8.31	4.48	4.72	6.04	1.71	-0.649	3.37	6.04	3.52	0.128	0.532	-0.416	-1.95	0.0185	1.24	15	9.21	-0.0287	-1.09	-7.33	-2.69
cg00217795	14	80677688	DIO2;DIO2;DIO2	1734	2	blue	-1.45	23.1	12.7	16.7	-8.49	4.13	-4.94	-0.309	-7.1	-14.1	4.1	-9.77	2.57	-0.524	0.0681	13.1	1.95	3.73	-1.09	-4.93	-1.98	3.11	-7.11	4.47	4.55	5.27	1.44	-0.361	2.35	5.04	2.35	-0.238	1.8	0.766	-1.12	1.11	1.45	13	9.34	0.369	-0.0778	-7.11	-2.68
cg00217953	2	97527635	SEMA4C	54910	2	blue	-2.18	18	12.2	13.5	-7.06	5.08	-4.71	2.94	-6.14	-10.4	3.61	-6.35	2.9	2.01	-0.707	13.2	1.13	3.46	-0.117	-2.26	0.163	3.21	-3.18	5.83	1.64	8.25	0.734	2.66	4.19	3.63	0.649	1.58	1.65	0.422	-0.379	1.59	0.587	9.94	6.97	0.0601	-0.0562	-4.66	-1.91
cg00218409	2	74963008		NA	3	brown	-3.55	15.7	20.1	7.89	-13	5.58	-10.6	-0.356	-4.18	-8.46	5.09	-1.8	-1.89	6.64	-0.775	13.2	1.5	7.23	-2.95	-3.47	-2.65	3.16	-2.15	3.58	4.16	7.12	0.104	2.63	5.03	5.08	-0.751	-0.349	2.15	-0.0755	-1.35	1.37	0.56	11.2	3.59	0.424	0.573	-2.89	-3.55
cg00218620	2	219866460	MIR375	494324	3	brown	0.977	9.99	17.1	5.4	-7.1	4.58	-3.68	1.41	1.79	-1.86	2.73	2.67	-0.654	9.5	1.37	14	5.99	10.4	0.47	1.74	0.427	-0.0833	2.13	7.34	5.92	6.18	1.28	5.73	11	5.69	-1.43	-1.98	3.31	1.42	1.36	1.52	1.03	4.41	2.43	2.27	2.96	0.876	-1.78
cg00218707	15	75587027	GOLGA6D	653643	2	blue	-3.65	20.3	12	14.9	-8.62	5.78	-6.68	-1.28	-8.43	-13.3	5.49	-8.99	2.59	0.15	-1.35	11.9	-0.994	2.88	-2.78	-4.48	-3.58	5.42	-7.57	2.47	3.64	6.5	1.11	-0.796	1.89	5.97	2.89	0.196	0.962	-0.96	-1.25	1.46	0.794	14.8	7.97	0.167	-0.915	-4.22	-1.28
cg00219956	16	30794205	ZNF629	23361	22	darkgreen	-12.5	0.685	0.42	3.01	1.43	8.66	-4.43	-0.388	-8.65	-0.868	11.5	-1.27	3.58	0.499	-1.22	3.23	-13.1	-5.86	-5.03	3.74	-8.65	19.5	-2.82	-2.4	0.531	8.46	-4.48	-0.701	1.88	4.26	9.43	9.6	2.21	1.43	1.98	0.763	1.06	11.4	2.99	0.431	2.48	-0.979	4.84
cg00220335	5	1343783	CLPTM1L	81037	8	pink	2.72	0.842	1.7	1.7	4.57	2.04	4.78	19.7	3.83	4.98	-0.553	3.8	4.78	4.86	1.16	3.5	-1.12	3.21	11.1	6.01	7.63	2.23	10.4	6.33	-4.42	6.58	2.17	5.79	4.89	-4.11	2.92	14.7	1.77	1.75	2.28	2.63	-5.16	-0.0217	-0.00497	1.35	2.06	1.1	2.43
cg00221525	16	31085579	ZNF668;ZNF646	NA	6	red	-9.12	2.33	2.94	4.62	1.79	15.6	-2.52	-2.36	-5.29	0.849	12.7	0.537	5.7	3.76	0.323	6.35	-7.22	-1.7	-5.43	6.77	-8.25	17.4	-2.02	1.08	4.11	10.5	-2.84	2	5.44	12.4	9.56	3.43	3.69	2.15	2.4	1.62	2.28	9.89	3.23	3.11	2.89	1.14	4.76
cg00221658	7	43912425		NA	5	green	1.39	-12.5	-9.48	-5.14	18.8	2.9	11.1	3.84	5.97	17.9	0.241	7.86	7.6	2.19	3.25	-3.95	-0.34	-3.23	2.7	14.3	2.76	1.57	8.09	1.85	-0.674	2.24	-1.28	3.31	3.16	1.59	1.73	2.67	2.31	2.79	4.25	0.244	0.5	-8.79	-3.18	4.08	3.23	7.2	6.66
cg00221718	3	128914668		NA	4	yellow	-4.22	19.2	13	16.3	-7.56	7.05	-5.35	0.625	-8.39	-12.2	6.15	-8.31	3.49	0.707	-0.991	15.7	-0.149	2.4	-2.05	-1.89	-2.83	5.5	-6.35	3.55	4.15	8.07	0.601	0.69	4.88	5.72	2.37	1.85	0.821	-0.283	-1.55	0.701	-0.0591	14.1	7.15	0.617	-1.09	-6.75	-1.4
cg00222799	21	43655464	ABCG1;ABCG1;ABCG1;ABCG1;ABCG1;ABCG1	9619	4	yellow	-0.702	15.7	7.87	20.2	-0.771	6.31	0.568	2.68	-5.67	-7.48	4.55	-8.46	9.51	-0.475	2.07	14.1	2.64	1.79	0.783	1.08	0.15	4.15	-4.39	6.74	4.89	7.8	0.979	0.894	4.79	6.25	3.66	1.89	1.32	1.04	-1.15	0.248	2.11	9.36	10	2.42	-0.699	-4.67	-0.22
cg00225697	6	112684258		NA	2	blue	0.301	17.7	11.2	11.3	-7.58	3.15	-3.94	0.993	-3.48	-9.87	1.98	-5.85	1.61	1.46	-0.619	10.2	1.42	6.19	0.871	-4	0.377	2.06	-3.97	4.48	2.23	4.98	2.91	1.21	1.81	4.01	2.06	-0.356	-0.808	-1.78	-2.98	0.577	0.142	9.77	5.15	-0.616	-1.6	-3.26	-3.12
cg00225830	16	13214589	SHISA9	729993	10	purple	0.451	-14.4	-6.89	-9.18	12.9	2.06	7.11	3.69	7.52	20.6	0.255	12.6	3	5.6	1.53	-4.32	-1.95	-1.52	2.12	13.3	2.39	2.16	11.3	1.2	-2.25	2.43	-1.44	5.06	4.41	0.26	1.16	3.31	1.92	1.95	3.13	0.908	-0.939	-7.96	-6.19	2.58	2.9	8	6.27
cg00226085	6	58172067		NA	22	darkgreen	-13	0.501	0.766	2.81	1.25	10.7	-4.27	-3.46	-7.99	-0.467	12.5	-0.7	3.78	1.42	-1.28	3.49	-13.5	-4.96	-6.96	4.56	-10.7	24.2	-3.85	-2.67	1.69	8.89	-4.1	-0.441	2.75	7.93	11.1	5.83	2.88	1.32	2.88	1.1	1.59	11.8	2.8	1.23	3.02	0.192	6.18
cg00226822	4	1157673		NA	2	blue	-1.64	18.6	15.3	13	-7.58	5.66	-5.25	1.79	-4.73	-8.79	4.05	-4.69	2.56	4.05	-0.598	15.1	1.07	5.6	-0.354	-1.69	-0.546	3.59	-2.78	5.73	2.57	8.38	1.64	2.11	6.12	5.19	1.24	0.511	1.59	-0.822	-0.563	1.15	-1.29	11.2	5.82	0.322	-0.0761	-3.86	-3.32
cg00226849	18	72201785	CNDP1;CNDP1	84735	2	blue	-3.8	24.5	13.7	15.8	-10.7	5.04	-7.76	-1.05	-9.27	-16.5	5.14	-9.97	1.49	-0.229	-1.1	13.1	0.478	2.86	-2.88	-5.65	-3.16	3.91	-8.19	3.08	3.77	5.9	0.602	-0.752	1.97	5.07	1.51	-0.151	0.0957	-0.861	-2.45	0.663	0.964	14.6	7.73	-0.591	-1.51	-6.76	-4.05
cg00227093	5	149979838	SYNPO	11346	3	brown	-1.25	12	21.8	5.32	-10.7	6.22	-7.13	0.124	0.413	-3.62	4.17	2.77	-2.62	10.9	-0.482	14.4	3.12	10.8	-1.2	0.0582	-1.18	2.77	1.65	6.76	4.97	7.53	1.73	6.22	9.89	6.93	0.55	-1.48	3.52	1.25	0.293	2	0.231	8.28	2.09	1.17	2.45	-1.41	-2.11
cg00228738	9	95944545		NA	5	green	3.6	-8.37	-10.9	-1.44	19.5	-0.269	14.4	5.42	4.14	11.2	-1.87	2.61	9.09	-1.91	2.32	-4.04	-0.82	-4.25	5.31	9.85	4.69	0.771	5.59	1.92	-2.43	0.566	0.694	1.58	0.797	-1.37	3.22	4.37	0.00747	1.44	2.32	-0.309	-1.27	-6.21	-1.04	2.31	1	3.13	5.71
cg00229387	6	43445942	TJAP1;TJAP1;TJAP1;TJAP1;TJAP1;TJAP1	93643	4	yellow	-3.36	15.3	9.21	18.1	-2.28	8.3	-2.1	1.73	-7.18	-7.6	6.64	-7.4	8.28	0.82	2.39	15	0.329	1.32	-1.13	1.5	-1.84	6.29	-4.49	5.1	5.08	10	-0.851	1.11	5.5	7.3	3.41	2.35	1.08	-0.112	-1.11	0.79	0.995	11.2	7.76	2.85	-0.731	-5.03	-0.00016
cg00230074	17	72358042	BTBD17	388419	3	brown	-0.794	14.3	24.6	6.26	-12.2	4.6	-8.21	0.762	-0.165	-5.08	3.38	1.55	-2.79	10.1	0.122	15	4.6	10.7	-0.949	-1.5	-0.515	0.963	1.08	7.14	4.45	7.21	0.957	5.63	8.75	5.21	-1.48	-2.16	3.35	1.12	0.0605	0.71	1.05	6.8	2.92	1.32	1.51	-0.935	-3.29
cg00230715	5	106854267	EFNA5	1946	4	yellow	1.39	18.2	10	14.8	-4.95	3.68	-0.699	0.533	-3.3	-9.77	2.82	-7.55	3.84	-0.0306	-0.627	12.4	2.66	6.32	1.54	-2.21	-0.49	3.3	-5.41	5.43	5.36	5.05	4.26	0.597	4.02	5.65	4.62	0.289	1.39	0.938	-1.21	0.768	1.83	11.9	8.45	-0.55	-0.191	-2.78	-1.93
cg00231006	5	130599637	CDC42SE2;CDC42SE2	56990	17	grey60	8.99	-0.0669	1.05	-2.3	-1.17	-5.9	3.17	0.956	7.01	1.37	-8.17	2.22	-2.91	0.933	2.19	-1.02	15	5.57	3.45	-1.95	7.28	-17.4	3.25	3.69	1.31	-5.8	2.35	2.22	0.161	-2.92	-11	-8.64	-0.727	0.394	-1.24	-1.23	0.223	-10.5	-2.3	1.33	-1.49	1.41	-4.2
cg00231771	6	35748776	C6orf127	NA	2	blue	-1.8	21	17.7	11.7	-11.3	4.61	-7.9	1.93	-4.84	-11	3.57	-4.88	0.0545	3.96	-0.268	14.1	0.849	6.59	-0.234	-4.15	-0.647	3.05	-2.81	4.88	2.16	7.23	1.25	2.05	4.38	3.68	0.816	1.12	1.5	-0.27	-1.44	1.58	-0.592	12.1	5.66	0.0156	-0.101	-4.6	-3.09
cg00231918	4	2819393	SH3BP2;SH3BP2;SH3BP2;SH3BP2	6452	10	purple	5.09	-8.56	-3.5	-5.66	13	1.48	11.1	5.35	11.6	20.3	-1.04	12.3	5.05	7.39	3.81	-0.705	4.02	3	5.53	14.6	5.25	-0.637	13.4	7.37	0.944	3.04	0.669	9.15	7.59	1.96	1.38	0.954	3.48	3.91	4.35	1.83	0.0507	-8.92	-3.87	4.46	5.11	8.18	6.56
cg00232483	16	19849514	IQCK	124152	2	blue	-2.73	23	19.4	13.3	-11.1	6.36	-8.2	0.0905	-5.68	-11	5.03	-4.98	1.05	4.32	-0.283	15.9	2.41	6.11	-2.25	-3.63	-1.96	3.29	-3.99	5.16	4.69	7.88	1.02	1.81	5.22	6.35	0.391	-0.905	1.73	-0.0631	-1.43	1.17	1.34	11.7	6.17	1.32	-0.633	-4.39	-3.13
cg00232816	10	134697093		NA	3	brown	-1.24	9.07	18.8	1.87	-10.5	4.52	-7.79	1.11	1.55	-2.39	3.09	5.28	-4.58	13	-1.88	11.1	2.64	11.2	-0.664	0.121	-0.244	2.22	3.45	6.89	2.68	7.77	2.01	7.9	9.58	4.73	-0.848	-1.17	6.3	3.37	2.79	2.18	0.103	6.26	1.68	-0.528	3.57	1.25	-3.08
cg00234261	7	151106082	WDR86	349136	3	brown	-0.47	12.6	20.9	4.21	-13.3	3.98	-8.67	0.195	0.294	-5.55	2.58	1.54	-4.47	9.05	0.0138	11.3	3.63	11.2	-0.861	-2.79	-0.598	0.629	0.766	5.08	3.93	5.39	1.16	5	6.87	4.63	-1.38	-2.18	2.96	0.938	-0.436	0.985	0.161	6.72	1.97	0.868	1.11	-0.422	-3.58
cg00234467	17	20220360		NA	5	green	1.7	-6.92	-8.58	-0.195	18.4	1.92	12.2	5.21	2.76	10.5	0.245	2.84	10.5	-0.481	3.41	-1.6	-0.252	-4.19	3.66	11.6	3.58	1.98	5.62	3.87	-1.19	3.11	-0.983	2.25	2.41	0.635	2.97	3.79	1.13	1.71	1.88	0.417	0.06	-5.03	-0.108	3.55	1.75	1.92	6.66
cg00234655	18	78007841		NA	8	pink	3.16	0.822	1.07	2.16	5.23	2.62	5.04	17.8	3.3	4.84	-2.05	3.15	5.91	4.18	2.73	3.14	1.36	2.53	9.21	6.18	9.5	-0.838	9.71	6.27	-4.7	6.11	0.687	5.7	4.53	-3.51	-1.34	9.16	0.645	1.07	0.877	2.43	-5.64	-3.29	-1.41	2.7	0.742	1.04	0.742
cg00235442	7	157408294	PTPRN2;PTPRN2;PTPRN2	5799	5	green	2.83	-5.65	-11.1	2.61	23.6	2.25	15	4.51	1.97	9.35	0.55	-0.557	15.3	-3.89	3.91	-2.25	1.38	-5.8	4.09	10.1	3.25	1.38	2.85	3.65	0.836	1.7	-0.124	0.708	-0.251	1.82	4.05	3.04	-0.201	1.87	0.889	-0.309	1.11	-5.72	1.23	4.41	0.272	2.36	5.4
cg00236305	2	1796076	MYT1L	23040	5	green	2.12	-6.58	-11.4	1.53	20.1	1.38	14.4	3.48	1.59	8.1	-0.42	-0.429	12.1	-4.36	2.31	-2.6	-0.979	-6.1	3.46	9.63	2.78	2.17	1.92	0.84	-0.242	0.729	0.193	-0.615	0.564	0.892	4.63	3.64	-1.14	0.909	1.56	-1.16	0.666	-4.55	0.661	2.77	0.577	1.47	6.67
cg00237010	12	772861	NINJ2	4815	2	blue	-1.86	25.4	13.9	15.2	-10.8	3.62	-6.34	0.591	-7.35	-16.2	3.22	-9.36	1.03	-0.188	-0.786	12.6	1.34	4.22	-0.779	-6.03	-1.2	2.41	-6.83	3.88	2.74	5.21	1.52	-0.334	1.82	3.48	1.18	0.173	0.682	-0.449	-1.78	0.552	0.478	12.6	8.11	-0.791	-1.19	-7.01	-4.5
cg00237520	5	177764237	COL23A1	91522	7	black	5.88	-6.97	-8.74	-1.44	17.9	-0.655	14.8	6.25	6.4	11.7	-3.78	3.65	8.99	-0.544	2.95	-3.3	1.53	-1.46	6.73	9.54	7.31	-0.86	7.18	3.78	-2.37	0.735	1.82	2.38	1.12	-0.815	2.32	2.9	0.287	1.53	0.826	0.429	-1.32	-7.26	-1.26	1.95	0.315	3.69	4.25
cg00238213	7	75896399	SRRM3	222183	3	brown	1.91	10.2	17.2	2.82	-10.2	2.1	-5.33	1.51	2.95	-3.01	0.576	3.2	-4.27	9.82	-0.813	10.3	5.23	12.3	1.37	-1.12	1.75	-1.33	3.16	7	2.92	4.69	3.1	7.55	8.54	3.48	-2.01	-2.6	2.88	0.382	0.123	0.25	-0.33	3.82	1.09	-0.438	1.79	0.392	-2.52
cg00238391	7	150977475		NA	8	pink	4.46	1.33	0.0949	3.01	6.04	1.39	6.84	23.2	3.49	4.05	-2.79	1.96	6.41	2.78	1.83	2.78	-0.00421	2.19	13	5.42	10.6	0.0477	9.79	6.88	-5.99	5.59	2.46	5.66	3.47	-4.99	1.39	12.8	0.287	1.38	0.96	2.92	-6.65	-2.14	-0.317	1.36	0.974	0.0701	1.97
cg00238510	2	38961590	GALM	130589	10	purple	3.29	-9.38	-3.47	-8.58	8.64	1.04	5.85	3.95	10	17.5	-1.64	12.8	2.04	7.21	1.72	-3.99	0.661	2.53	3.54	9.72	4.34	-0.25	12.5	2.63	-1.55	1.73	0.522	6.34	2.68	0.434	0.0673	1.43	3.63	2.72	4.6	1.92	-1.16	-8.2	-4.91	2.15	4.54	8.21	4.21
cg00238818	5	176880261	PRR7	80758	5	green	2.51	-8.34	-11.1	-0.823	21.1	1.43	13.1	4.39	2.78	12.5	-0.207	2.71	11.3	-1.49	3.89	-3.72	0.977	-5.61	3.36	10.6	3.68	0.606	5.38	3.35	-0.653	1.52	-0.945	1.97	0.881	0.732	1.94	2.46	1.08	1.95	2.86	0.634	-0.0218	-7.53	-0.133	4.16	1.95	2.78	5.53
cg00238899	10	112046866	MXI1;MXI1;MXI1	4601	2	blue	2.7	18.2	9.92	11.9	-7.51	0.973	-2.28	0.851	-2.71	-11.5	-0.351	-7.3	1.19	-0.32	-1.28	9.34	2.42	6.45	1.91	-5.29	1.53	0.625	-4.66	4.67	1.98	2.93	4.6	0.409	1.4	2.74	2.3	-0.955	0.233	-0.447	-0.709	1.53	0.0648	9.24	6.72	-1.76	-0.56	-5.4	-3.32
cg00239117	2	238928702	UBE2F	140739	5	green	1.62	-5.2	-8.72	2.13	18.3	2.75	12.7	3.72	1.2	8.98	0.726	0.281	13.4	-2.45	3.74	-1.21	-1.03	-5.05	2.94	10.2	2.55	2.91	2.93	2.21	-0.0877	2.75	-0.591	0.418	1.25	2.22	4.12	3.34	-0.296	0.229	1.47	-0.328	0.38	-3.63	0.637	4.57	0.351	1.25	5.98
cg00241281	14	105779794	PACS2;PACS2	23241	2	blue	-1.64	27.4	13.3	17	-10.3	3.58	-5.77	-0.294	-8.01	-17.2	3.43	-10.9	1.75	-1.14	-0.597	12.5	2.11	3.75	-1.15	-6.45	-1.65	2.42	-8.18	4.13	3.87	4.68	1.7	-0.603	1.38	4.23	1.74	-0.507	0.251	-0.327	-2.44	0.0359	1.02	12.8	8.55	-0.263	-1.48	-7.15	-4.21
cg00241813	5	43280252	MGC42105	NA	7	black	2.95	-7.02	-9.67	-0.303	17.8	0.74	14	3.83	3.63	9.24	-1.15	1.99	9.47	-1.83	2.35	-2.78	-0.501	-3.74	3.96	10	3.53	1.59	3.93	1.64	-1.21	1.26	0.628	1.42	1.33	0.659	3.62	3.17	0.379	2.18	1.49	-0.514	-0.271	-5.02	-0.281	2.15	0.915	3.41	6.21
cg00242020	8	37797632	GOT1L1;GOT1L1	137362	2	blue	0.53	19.1	12.1	12.1	-10.2	1.1	-5.6	-0.209	-4.51	-12.6	1.38	-7.81	0.0513	0.1	-1.11	9.05	2.74	5.46	0.143	-7.45	-0.507	0.549	-5.45	3.58	3.35	2.52	3.15	-0.889	0.337	2.29	0.893	-0.801	0.849	-0.051	-1.59	1.48	0.175	10.6	8.03	-1.5	-0.482	-5.1	-4.07
cg00242039	19	58447434	ZNF418	147686	2	blue	-2.59	26.1	14	15.8	-11.1	4.13	-6.95	-0.233	-8.36	-17.3	3.83	-10.2	1.18	-0.495	-0.766	12.8	0.339	3.64	-1.58	-6.2	-2.14	3.29	-7.8	3.1	2.89	5.43	1.02	-0.799	1.64	4.06	1.61	0.0455	0.178	-1.12	-2.05	0.52	0.521	14	7.86	-0.641	-1.52	-7.1	-3.98
cg00244111	3	149086884	TM4SF1	4071	2	blue	2.64	22.4	11.5	13.1	-9.81	0.729	-3.49	-0.0868	-3.28	-14.5	-0.0563	-8.88	0.172	-1.15	-0.495	9.62	3.34	7.33	1.6	-7.45	0.698	0.14	-6.29	3.75	3.53	1.76	4.24	-0.868	0.504	2.91	2.27	-1.25	-0.286	-0.37	-2.53	0.959	0.235	10.6	7.19	-0.842	-1.3	-5.95	-4.62
cg00244391	6	109420291	C6orf182	NA	5	green	1.16	-6.57	-9.68	0.576	20.3	2.11	13.2	6.72	1.85	9.91	0.589	1.81	11.6	-1.66	2.49	-1.96	-2.28	-5.26	4.72	11.2	3.51	3.42	5.08	2.6	-1.98	3.35	-0.455	2.18	1.64	-0.325	4.43	6.62	-0.0665	1.23	1.32	-0.588	-1.09	-3.87	-0.605	2.23	0.827	2.67	6.21
cg00244776	6	30883192	VARS2;VARS2;VARS2	57176	4	yellow	-1.97	14.5	7.57	17.3	-1.59	7.04	-1.12	2.16	-6.37	-7.38	5.33	-8.01	8.32	-0.24	0.979	12.2	0.0173	1.42	0.00849	0.374	-1.18	6.12	-4.48	4.99	4.09	8.13	0.815	-0.101	3.54	6.41	4.75	2.99	1.2	0.942	-1.07	1.08	1.05	11.5	8.28	1.95	-0.399	-4.51	0.583
cg00245075	12	51756242	GALNT6	11226	2	blue	-3.05	24.9	14.9	16.4	-10.3	4.95	-7.41	-0.465	-8.31	-14.9	4.79	-9.18	1.81	0.425	-0.272	14	1.17	3.4	-2.39	-5.27	-2.52	3.4	-7.08	3.46	4.21	5.86	0.543	-0.773	2.95	4.82	1.27	0.0737	0.00828	-1.05	-2.42	0.647	0.142	13.8	7.23	0.525	-1.42	-6.93	-3.34
cg00245746	2	674940	TMEM18	129787	5	green	-0.3	-3.55	-6.47	4.05	18.3	5.43	10.9	4.01	-0.251	7.73	2.41	0.0597	15.6	-0.899	3.52	1.77	-0.12	-5.13	1.4	12.8	2.08	3.42	2.74	4.24	0.795	5.81	-1.43	1.85	3.62	4.07	2.64	2.75	-0.775	-0.0765	0.591	-0.579	1.54	-3.3	0.229	4.05	0.0896	2.13	4.81
cg00245778	1	179064635	TOR3A	64222	7	black	3.92	-5.4	-10.6	1.78	18.6	0.477	15.4	4.6	2.88	7.56	-1.63	-0.512	11.8	-4.16	2.82	-2.74	-0.213	-4.42	5.18	8.21	4.21	1.43	2.78	1.98	-0.851	0.38	1.21	-0.346	-0.454	0.0733	5	4.02	-0.347	2.12	1.27	-0.131	-0.0711	-4.3	1.22	1.77	0.56	1.55	4.88
cg00246121	5	141030607	FCHSD1	89848	3	brown	-2.48	12.5	18	8.44	-6.86	7.71	-5.05	1.91	-1.36	-3.77	6.1	0.885	0.819	9.17	1.37	16.9	2.48	7.85	-0.689	2.42	-1.45	4.48	0.906	8.16	5.34	10.6	-0.275	6.59	10.4	7.18	1.53	0.823	4.69	2.91	0.565	2.77	1.48	8.73	3.83	2.82	4.03	-1.56	-2.09
cg00246969	13	99159656	STK24;STK24	8428	10	purple	3.48	-13.5	-7.49	-8.56	13.5	0.553	9.54	2.84	9.58	20.6	-1.82	11.1	3.58	4.34	2.47	-5.33	0.643	-0.116	3.4	11.3	3.7	-0.126	10.2	1.69	-1.22	0.0488	0.138	4.41	2.84	0.615	1.44	1.07	2.53	3.14	3.26	0.351	-0.0216	-9.66	-4.49	2.53	3.7	8.29	5.32
cg00250391	11	93850000		NA	8	pink	7.16	3.1	1.48	3.17	4.42	0.592	7.65	19.3	6.05	3.11	-4	2.13	4.89	3.42	1.28	3.16	0.57	5.74	15.2	4.1	11.7	0.246	9.45	8.15	-5.2	4.63	5.46	6.53	3.37	-3.61	4.07	10.9	1.29	1.49	1.35	2.62	-5.65	0.0852	0.881	0.777	1.56	0.418	1.44
cg00251716	1	243479948	SDCCAG8	10806	2	blue	0.577	27	13.1	16.1	-9.73	2.62	-4.47	0.283	-5.46	-15.4	1.84	-9.8	1.46	-0.726	-0.656	11.8	3.32	5.81	0.325	-6.56	-0.111	0.922	-6.73	4.84	3.4	3.77	3.06	-0.243	1.46	3.79	1.34	-1.29	0.572	-0.0412	-2.21	0.88	0.603	11.1	8.21	-0.586	-1.38	-6.89	-5.05
cg00252442	1	201451260		NA	3	brown	-0.907	14.8	24.8	6.53	-13.1	4.38	-8.37	0.0494	-0.66	-6.44	2.8	0.508	-3.37	8.51	-0.71	14.8	3.87	10.4	-1.41	-2.33	-0.546	1.04	0.156	5.22	4.6	6.02	1.41	4.23	8.09	4.92	-1.23	-1.88	2.73	0.875	-0.0944	1.7	0.638	7.89	2.6	0.695	1.64	-1.76	-3.25
cg00252472	6	150739173		NA	2	blue	-1.31	22.4	11	17.7	-6.57	4.89	-3.65	1.09	-6.84	-12.9	3.14	-9.8	4.21	-0.783	0.579	12.8	1.23	3.65	-0.249	-3.55	-0.174	3.43	-6.17	4.16	3.35	6.09	1.36	0.453	2.42	5.08	2.35	0.657	0.18	-0.395	-1.98	0.234	0.157	11.9	7.74	0.43	-1.67	-5.89	-2.66
cg00252696	1	31769601	ZCCHC17;SNRNP40;SNRNP40	NA	17	grey60	12.9	0.142	0.847	-1.75	0.0238	-7.43	5.25	5.41	9.26	2.41	-10.5	2.47	-1.75	1.19	2.47	-1.08	16.8	6.46	7.76	-1.67	11.9	-20.7	6.43	5.67	-0.318	-5.58	3.99	3.09	0.208	-5.63	-11.4	-5.22	-1.13	0.313	-1.17	-0.397	-1.54	-12.3	-2.56	0.647	-1.52	1.04	-5.03
cg00253228	8	145025610	PLEC1;PLEC1;PLEC1;PLEC1	NA	10	purple	1.98	-8.48	-2.89	-5.22	11.1	3.2	7.46	4.29	7.93	18.2	0.666	11.2	5.2	7.39	2.74	-0.46	2.11	1.36	2.88	14.3	3.33	0.77	11.1	5.07	0.245	3.94	-0.296	7.8	7.12	2.6	0.773	1.13	3.16	2.3	3.54	-0.487	0.846	-7.59	-3.25	3.45	3.27	8.92	5.24
cg00253398	22	46833806	CELSR1	9620	2	blue	-2.27	25.1	15.2	15.4	-10.8	4.28	-7.45	-0.304	-7.26	-14.6	4.12	-8.59	1.33	0.908	-0.827	13.1	1.73	4.41	-1.85	-5.77	-2.1	2.64	-6.43	4.04	3.69	5.78	1.38	-0.199	2.46	4.56	0.731	-0.79	0.914	-0.716	-2.04	0.714	0.493	12.6	7.82	-0.102	-1.23	-6.2	-3.45
cg00254771	1	11538304	PTCHD2	57540	3	brown	-2.75	18.5	13.1	14.7	-6.32	6.71	-5.37	0.398	-6.38	-8.61	6.26	-5.85	4.54	3.2	0.268	14	2.3	3.78	-1.91	-1.58	-2.32	4.04	-4.24	6.45	4.79	8.94	0.762	1.9	4.48	7.03	1.36	-0.671	2.3	0.0996	-0.869	0.2	1.74	10.8	7.83	1.18	-0.144	-4.24	-2.38
cg00254888	6	163880196	QKI;QKI;QKI;QKI	9444	2	blue	4.74	19.4	10.5	11.5	-8.17	-0.257	-1.89	2.31	-0.982	-11.2	-1.62	-6.89	0.339	-0.212	-0.377	8.7	3.97	8.2	4.15	-6.4	3.25	-1.26	-3.42	5.34	1.68	1.77	4.96	0.711	0.681	1.6	1.52	-0.437	0.298	-0.317	-1.6	0.604	-0.288	8.07	6.87	-1.28	-1.22	-5.06	-3.9
cg00255732	2	242147702	ANO7	50636	3	brown	-1.87	19.5	18.7	11.9	-10.1	5.7	-7.02	0.497	-4.28	-9.29	4.69	-3.95	0.989	4.97	0.217	15.2	3.15	6.41	-1.59	-2.71	-1.4	2.7	-2.78	6.12	4.71	7.6	0.687	2.86	5.67	6.01	0.263	-0.913	2.19	0.761	-0.458	1.17	0.349	10.3	5.86	0.971	1.03	-3.46	-3.65
cg00256675	4	802962	CPLX1	10815	5	green	4.11	-5.28	-10.5	2.52	20.5	0.8	16.5	4.68	2.79	7.88	-0.653	-0.994	13.1	-4.45	3.09	-2.05	1.03	-4.54	5.26	9.15	3.82	1.39	2.45	2.79	0.912	0.473	1.02	0.156	0.351	0.838	5.22	4.02	0.516	2.89	1.64	-0.095	1.58	-4.36	2.51	2.82	1.65	1.73	5.85
cg00256932	22	51041732	MAPK8IP2;MAPK8IP2	23542	5	green	0.987	-4.97	-8.22	2.54	18.5	3.2	12	3.71	1.04	8.31	2.12	0.509	13.6	-1.79	3.87	0.0111	0.51	-5	2.56	11.6	1.7	2.69	2.95	3.93	1.22	3.71	-1.25	1.94	2.47	2.67	3.67	2.85	2.3	2.85	2.95	0.417	2.34	-3.8	2.63	4.22	2.76	1.82	7.38
cg00257893	6	138820840	NHSL1;NHSL1	57224	2	blue	-3	24.3	14	15.2	-10.7	5.05	-7.48	-0.314	-8.19	-15.2	4.47	-9.18	1.63	0.473	-1.01	12.7	1.1	3.45	-2.27	-5.57	-2.29	3.34	-7.06	3.77	3.51	6.26	0.919	0.519	2.14	5.05	1.05	-0.552	0.537	-0.683	-2.09	0.636	0.921	12.4	7.51	0.0383	-1.45	-6.28	-2.76
cg00260803	16	2107101	TSC2;TSC2;TSC2	7249	2	blue	-1.3	25.5	12.5	16	-9.19	3.94	-5.13	-0.487	-6.97	-15	3.98	-9.75	2	-0.59	-0.913	12.3	2.14	4.52	-0.802	-5.6	-1.97	2.88	-7.61	4.73	4.55	4.86	2.21	0.162	1.58	5.1	2.61	-0.499	0.751	-0.0977	-1.49	-0.0394	1.76	13	8.72	-0.733	-0.436	-6.05	-3.78
cg00262132	4	113430381		NA	5	green	4.61	-11	-6.5	-7.09	13.1	-0.05	10.9	5.2	10	17.8	-3.3	10.3	3.9	4.2	3.25	-3.95	1.74	0.782	5.23	11.4	6.31	-1.45	11.6	3.03	-1.94	0.564	0.429	5.85	3.79	-0.544	0.406	1.75	1.75	2.62	2.98	0.506	-0.646	-10.3	-4.53	2.77	3.19	6.13	4.93
cg00262446	4	101439228	EMCN;EMCN;EMCN;EMCN	51705	3	brown	-1.25	9.62	19	2.24	-11.4	4.72	-8.14	0.175	1.18	-3.17	2.63	4.05	-4.68	11.3	-0.254	10.4	3.15	11	-1.39	-0.715	-0.307	1.27	2.37	4.73	3.7	6.35	0.556	6.7	8.21	5.05	-1.83	-1.8	2.99	1.47	0.511	0.367	-0.0744	5.57	-0.301	0.662	2.06	2.61	-2.57
cg00263248	14	98444151	C14orf64	388011	2	blue	0.625	20.3	16.1	10.8	-11.3	2.86	-5.93	0.774	-2.75	-11	1.91	-4.98	-0.707	2.95	-0.705	12.9	2.75	8.19	0.552	-4.85	0.154	1.42	-3.16	5.21	2.94	5.06	3.03	1.47	3.63	3.84	1.1	-0.77	2.83	0.843	-0.607	1.79	0.112	10.8	7.23	-0.745	0.494	-5.01	-4.11
cg00263368	7	150999591		NA	3	brown	-3.01	13.7	17.3	6.9	-9.36	6.4	-7.58	0.448	-2.55	-5.84	5.36	-0.203	-0.847	7.82	-0.923	12.9	0.543	7.52	-1.75	-0.723	-1.98	4.92	-0.316	5.38	3.55	9.13	1.02	5.03	6.66	6.2	1.68	0.261	3.91	1.57	0.504	1.12	0.123	10.6	4.3	0.571	1.69	-1.47	-1.55
cg00265360	17	1101278		NA	10	purple	5.03	-6.33	-0.00268	-7.84	5.48	0.493	5.35	7.48	12	15.2	-2.36	14.9	0.172	10.5	1.85	-1.36	3.56	5.63	6.29	8.94	6.87	-2.14	17.1	7.22	-1.89	2.86	1.68	12	5.34	-0.586	-0.933	1.59	4.16	4.28	4.09	1.53	-0.734	-8.58	-5.01	2.19	4.46	7.31	2.82
cg00269140	7	86389542	GRM3	2913	2	blue	4.65	19.3	10.1	12.5	-7.45	0.745	-1.44	1.95	-1.23	-11.4	-1.28	-7.56	1.25	-0.752	0.344	9.06	4.62	8.18	3.69	-5.9	3.12	-1.06	-4	5.47	2.76	1.81	4.76	0.49	0.64	2.58	1.98	-1.03	0.753	0.565	-1.92	0.646	-0.0353	7.81	7.23	-0.198	-0.907	-4.87	-4.04
cg00269659	16	27729685	KIAA0556	23247	3	brown	0.472	21.7	15.5	12.5	-9.88	3.33	-5.43	3.52	-3.17	-11	1.81	-5.39	0.517	2.69	-0.163	12.7	3.44	7.52	1.97	-4.79	1.5	0.886	-2.42	5.88	2.73	5.3	2.71	1.45	3.35	2.52	0.5	1.45	1.42	0.65	-1.04	2	-0.89	9.94	6.22	0.356	0.0358	-4.39	-3.89
cg00276443	7	150878319	ASB10;ASB10;ASB10	136371	2	blue	-0.0627	17.1	9	12.4	-6.76	2.44	-3.36	1.72	-5.04	-11.4	2.49	-8.16	2.17	-0.902	0.898	8.81	1.92	3.58	1.17	-5.08	-0.404	1.56	-5.15	4.32	2.39	3.88	1.42	-0.343	0.0714	2.3	1.85	1.42	0.109	-0.0104	-1.02	2.24	-0.758	10	6.8	0.645	-0.134	-5.77	-2.79
cg00277048	2	25472875	DNMT3A;DNMT3A;DNMT3A	1788	7	black	5.42	-6.17	-12.1	0.723	18.2	-1.62	16.7	4.84	3.66	7.4	-3.36	-0.764	10.1	-5.06	2.56	-4.34	1.32	-4.45	6.03	6.9	5.52	-1.34	2.89	2.15	-1.97	-1.21	1.65	-0.0471	-1.65	-1.59	2.98	2.38	-1.59	0.463	-0.228	0.604	0.384	-7.04	0.0756	1.96	-0.674	1.43	4.25
cg00277714	13	30459305		NA	2	blue	-3.27	23.9	13.4	16.2	-9.85	5.57	-6.77	-0.453	-8.67	-15.5	4.56	-9.84	2.08	-0.374	-1.14	13.2	0.0956	3.24	-2.31	-5.11	-2.42	4.27	-7.7	2.97	3.32	6.09	1.06	-0.585	2.11	5.17	2.16	0.123	0.525	-0.412	-1.9	0.26	0.622	13.9	7.71	-0.434	-1.36	-6.53	-3.57
cg00278494	4	8639337		NA	8	pink	9.24	2.05	0.237	1.82	3.51	-3.21	7.79	17.4	6.73	2.25	-6.96	1.35	3.13	1.24	0.963	1.07	0.803	5.31	16.5	1.83	12.9	-2.15	8.63	6.33	-6.41	1.51	5.04	4.13	1.4	-6.85	2.93	9.52	-0.316	0.927	0.507	1.94	-4.81	-1.78	-0.105	-0.89	0.627	-0.0557	0.317
cg00280609	1	45250840	BEST4	266675	2	blue	-0.032	17.1	11	14.5	-4.68	4.44	-2.58	4.97	-4.2	-7.72	2.04	-6.15	5.11	2.02	0.536	12	1.2	4.34	2.22	-1.51	2.4	2.79	-1.61	6.56	0.432	7.91	1.84	2.1	3.8	2.93	1.83	2.6	1.53	-0.329	-0.604	0.774	-0.228	8.45	7.66	0.916	-0.454	-4.49	-1.44
cg00283876	16	30906273	BCL7C	9274	5	green	0.177	-3.28	-7.72	4.36	17.2	3.98	11.1	5.17	-0.608	6.02	2.31	-1.6	14.9	-2.95	3.41	0.352	-1.2	-5.71	2.84	9.95	2.18	3.99	1.88	2.79	0.0883	4.42	-1.34	0.486	1.3	2.2	4.32	5.19	-0.668	1.64	0.711	-0.571	1.02	-2.19	1.09	3.02	0.916	2.18	5.47
cg00284259	7	75827723		NA	3	brown	-1.3	10.1	19.7	3.83	-9.67	5.17	-6.95	1.76	1.02	-2.38	3.5	4.2	-2.78	12.3	-0.0478	13.1	2.63	10.8	-0.417	0.757	-0.0627	2.3	3.27	6.9	2.89	8.6	0.935	6.88	10.1	4.93	-0.801	-0.76	4.35	1.19	1.08	2.37	-0.451	6.4	1.12	1.86	2.21	-0.198	-2.07
cg00284386	8	1786207	ARHGEF10	9639	2	blue	-2.12	23.2	15	13	-12.4	3.8	-7.97	-0.82	-6.57	-15.2	3.34	-7.75	-0.302	0.964	-1.48	12.2	0.75	4.97	-1.86	-6.38	-1.95	2.84	-6.34	2.98	3.27	5	1.79	-0.0879	1.78	4.24	1.13	-0.553	0.835	-0.66	-1.49	1.21	0.396	13.4	6.75	-1.07	-0.67	-6.11	-3.7
cg00285394	8	126011954	SQLE	6713	4	yellow	-1.76	17.1	9.32	20.2	-2.89	6.61	-1.41	1.68	-6.73	-8.97	4.93	-9.03	7.64	-0.269	1	14.7	1.99	1.91	-0.678	0.00122	-0.685	3.78	-5.16	5.99	4.27	7.82	0.999	0.473	4.89	6.39	2.38	0.467	0.0015	-0.857	-2.24	0.0537	1.14	9.76	8.28	1.54	-1.42	-6.05	-1.61
cg00286119	8	29732574		NA	4	yellow	-2.61	18	10.6	17.4	-4.63	6.14	-2.75	0.636	-7.09	-10.3	4.99	-8.36	5.26	0.163	-0.00893	14.2	0.0316	2.51	-1.19	-1.16	-1.78	5.45	-5.87	4.19	3.86	7.46	1.08	-0.172	4.84	6.03	3.73	1.36	0.919	-0.835	-1.35	1.22	0.0955	13.1	8.84	1.63	-0.668	-5.75	-0.204
cg00286773	11	12207449	MICAL2	9645	5	green	2.23	-11.3	-10.4	-3.68	22.1	2.2	14.5	3.89	5.83	16.6	0.284	6.39	8.87	0.805	3.17	-3.51	-0.703	-3.43	3.72	14.5	2.81	2.18	7.12	2.41	-0.857	2.03	-0.321	3.37	3.12	1.65	3.86	3.07	1.95	2.74	3.87	0.0736	0.151	-7.39	-2.14	3.57	3.13	5.67	6.97
cg00288844	16	11835360	TXNDC11	51061	5	green	-0.316	-9.3	-7.58	-2.62	17.1	4.27	8.8	3.78	3.08	15.4	2.15	5.9	9.94	2.35	4.18	-2.06	-0.244	-4.32	1.17	13.7	1.99	2.74	7.34	3.29	-0.254	4.6	-2.76	3.71	3.35	2.77	1.34	2.29	1.74	2.31	2.7	0.802	0.0204	-6.91	-2.1	4.3	1.88	5.64	6.08
cg00289254	11	65197783		NA	3	brown	-0.304	13	23.6	4.53	-13	4.05	-7.82	0.46	0.798	-5.28	2.75	2.23	-4.6	9.98	-0.49	13.5	3.65	12	-0.425	-1.77	-0.428	1.24	1.32	6.39	3.81	6.1	1.63	6.32	8.9	4.78	-0.449	-1.64	4.19	2.04	1.36	2.01	-0.31	7.58	2.52	0.747	3.1	-1.71	-2.86
cg00290101	11	92624742	FAT3	120114	2	blue	-1.49	26.7	14.9	15.3	-11.5	3.84	-6.74	-0.782	-6.93	-16.3	3.23	-9.31	0.766	-0.00135	-1.15	12.7	1.5	4.97	-1.42	-6.52	-1.8	2.64	-7.42	3.29	3.81	4.64	2.04	-0.467	1.9	4.61	1.61	-0.835	0.693	-0.525	-1.86	0.299	0.793	13.5	7.96	-0.842	-1.3	-6.64	-4.2
cg00290758	10	121171859	GRK5	2869	3	brown	-0.64	11.2	17.3	2.5	-16.2	1.21	-10.2	-1.24	-0.48	-7.44	1.52	0.72	-7.3	6.57	-1.2	8.28	3.16	9.14	-1.24	-5.79	-1.35	-0.354	-0.811	3.15	3.38	2.5	1.18	2.95	3.51	2.17	-1.64	-1.86	2.85	1.44	0.205	1.28	-0.289	7.48	2.51	-0.964	2.21	-1.38	-4.66
cg00290994	1	41848739		NA	10	purple	5.39	-14.6	-6.74	-11.3	10.6	-2.18	8.73	3.35	12.1	19.3	-3.34	13	0.151	4.43	2.12	-6.13	3.78	1.19	4.64	9	4.64	-3.68	11.6	1.76	0.478	-2.96	0.49	4.75	3.19	-1.88	-0.768	1.12	1.74	3.4	3.17	-0.157	-0.353	-11.7	-6.04	2.44	3.59	7.55	4.68
cg00291054	16	81073839	ATMIN	23300	7	black	4.03	-4.54	-9.88	2.82	18.2	1.67	15.6	3.52	2.86	7.38	-0.437	-1.06	13.1	-4.21	4.07	-1.86	0.615	-4.09	4.72	8.54	3.29	1.6	1.85	2.41	0.714	0.796	0.526	0.401	-0.0606	2.22	5.22	2.44	0.281	1.85	1.57	-1.1	0.962	-4.49	2.1	4.02	0.434	2.15	5.02
cg00291292	20	61702795		NA	5	green	-0.315	-4.63	-7.25	2.5	17.6	4.05	10.7	4.08	0.178	8.03	2.65	0.901	13.2	-0.702	3.25	0.394	-2.24	-5.12	2.08	12.1	1.49	5.07	3.1	3.21	-0.301	5.49	-1.6	1.97	2.95	2.73	4.55	4.38	1.14	0.862	1.71	-0.671	0.949	-1.71	1.7	3.59	0.938	1.86	6.8
cg00291366	1	12616550		NA	3	brown	-1.22	12.1	21.5	4.37	-11.4	6.05	-8.42	-0.0321	0.298	-3.83	3.89	2.71	-2.91	10.9	-0.495	12.7	3.95	10.9	-1.54	-0.909	-0.985	1.64	1.34	6.72	4.96	7.43	1.53	6.53	7.84	6.77	-0.925	-2.63	3.51	0.987	-0.0203	1.69	0.663	6.38	1.54	0.946	1.94	0.129	-3.18
cg00291929	X	70129657	TEX11;TEX11	56159	8	pink	3.64	2.82	2.18	3.75	4.63	2.98	5.35	19.6	3.3	3.81	-1.25	2.31	6.42	4.36	2.07	4.42	-0.0569	3.41	11	5.63	8.97	1.24	9.48	7.87	-5.07	7.42	2.42	6.11	4.37	-2.81	1.96	11.1	2.47	1.71	2.52	3.13	-5.38	-0.527	1.49	2.19	1.95	-0.356	2.15
cg00292107	1	32800350	MARCKSL1	65108	4	yellow	-1.27	18.3	9.59	19.1	-4.35	5.6	-2.01	0.531	-6.95	-10.7	4.06	-10.2	5.92	-1.21	0.753	13.3	1.76	2.4	-0.655	-1.78	-0.945	3.72	-6.48	4.83	4.37	6.06	1.08	0.00128	3.77	6.18	3.19	0.16	0.589	-0.578	-1.63	-0.563	1.6	10.8	9.3	1.44	-0.993	-6.9	-0.738
cg00292971	7	143060536	FAM131B;FAM131B	9715	4	yellow	-1.87	15.1	7	17.6	-2.86	4.88	-1.41	1.84	-7.56	-10.6	3.14	-10.4	6.51	-2.36	-0.709	11.3	-0.798	0.627	-0.16	-1.48	-0.166	4.59	-6.11	2.81	1.84	6.1	1.41	-1.48	2.81	3.94	3.47	2.59	-0.903	-1.43	-1.96	-0.284	0.395	11	7.54	-0.572	-1.65	-6.1	-1.36
cg00293191	16	73126120	HTA	NA	2	blue	-4.08	23.3	13.3	15.7	-9.92	5.63	-7.87	-0.676	-9.33	-15	5.09	-9.49	2.16	0.14	-0.979	13.1	0.0495	2.5	-2.99	-4.87	-2.78	4.03	-7.41	3.02	3.13	6.68	0.317	-0.51	2.01	5.2	1.11	-0.177	-0.00815	-1.59	-2.28	0.434	0.711	13.4	7.32	-0.311	-1.72	-6.09	-3.12
cg00293626	8	143463227	TSNARE1	203062	5	green	3.14	-6.1	-12.6	1.79	19.1	-0.116	14.3	3.29	1.54	6.64	-0.486	-2.21	11.6	-6.58	3.16	-4.18	0.754	-6.41	4.07	6.67	2.57	0.685	0.751	0.801	0.952	-1.47	0.108	-2.07	-2.28	-0.294	4.3	4.01	-1.12	2.64	0.469	-0.658	0.589	-4.43	1.45	2.48	0.681	1.57	4.16
cg00293660	6	55103999	HCRTR2	3062	3	brown	-0.371	16.7	18.9	8.18	-10.9	4.89	-6.48	0.691	-1.34	-7.33	3.14	-1.18	-1.14	6.64	0.403	13.3	3.38	9.6	-0.271	-2.78	-0.499	1.83	-1.06	5.74	4.55	6.18	1.71	3.63	5.57	5.39	0.637	-0.89	2.84	1.35	-0.537	1.56	0.796	9.25	4.24	1.8	1.62	-1.97	-2.75
cg00294267	16	49572227	ZNF423	23090	5	green	4.72	-7.15	-7.35	-1.28	18.3	1.2	15	6.19	6.79	12.9	-1.67	4.94	9.31	1.34	3.61	-1.29	2.11	-1.02	6.04	13	5.95	0.481	8	5.57	-0.246	2.53	1.29	5.29	4.06	0.996	3.24	3.23	2.14	2.99	2.67	-0.138	0.232	-6.72	-0.363	4.15	2.69	5.34	7.59
cg00294956	5	13921996	DNAH5	1767	3	brown	0.565	10.5	21.3	2.29	-10.6	4.78	-6.55	1.67	3.34	-1.79	2.69	5.81	-4.05	14.3	0.0881	11.7	4.6	14.4	0.689	0.253	0.712	0.992	4.34	8.2	3.6	7.65	2.22	9.23	9.29	5.63	-0.958	-2.02	4.54	2.09	1.48	1.29	0.406	5.08	0.382	1.08	3.07	1.67	-2.63
cg00297721	20	55200767		NA	10	purple	5.68	-7.9	-2.19	-7.65	8.42	0.601	7.9	5.39	12.7	18.5	-1.24	14.1	1.96	9	3.15	-2.11	4.76	4.61	6.04	10.5	5.13	-1.69	14.9	8.14	0.429	2.26	1.36	10.7	4.93	1.24	0.923	0.26	5.23	5.19	5.09	1.27	1.71	-9.54	-3.67	3.43	6.62	9.05	4.25
cg00298532	1	9790325	CLSTN1;CLSTN1	22883	5	green	1.75	-8.16	-14.4	-0.0286	19.3	-0.644	12.6	3.25	0.847	7.49	-0.997	-1.34	10.1	-6.22	1.71	-5.67	-1.88	-7.85	3.33	6.76	2.45	1.41	1.34	-0.637	-1.96	-1.12	-0.246	-2.09	-2.63	-1.57	3.81	4.5	-1.47	0.5	0.706	-0.908	-0.154	-4.98	0.338	1.26	-0.373	1.18	5.03
cg00300046	1	2084595	PRKCZ;PRKCZ;PRKCZ	5590	7	black	3.14	-6.04	-10.8	0.97	17.3	0.0614	13.8	2.63	2.58	6.93	-0.866	-0.765	10.2	-4.7	2.76	-3.21	0.397	-4.83	3.75	7.58	2.6	1.34	1.23	1.5	0.235	-0.378	0.611	-0.381	-0.443	0.636	4.85	2.55	-0.317	2.33	0.851	-0.683	0.956	-4.26	0.895	2.75	0.687	2.11	5.27
cg00301239	8	103801487		NA	3	brown	-0.41	11.1	19.9	3.79	-11.6	3.47	-7.84	2.08	0.888	-4.06	1.87	3.06	-4.13	10.7	-0.627	12.3	1.99	11.4	0.275	-0.974	0.749	1.25	2.7	5.92	1.36	6.91	1.42	5.86	9.13	2.9	-1.24	-0.679	3.42	-0.0346	1.36	1.22	-2.16	6.43	1.67	-0.257	2.18	-0.658	-2.57
cg00301679	7	150817013	AGAP3;AGAP3	116988	5	green	3.99	-6.16	-10.1	1.03	21.4	0.953	16.3	9.99	3.5	9.84	-1.95	1.21	12.3	-2.53	2.8	-2.52	-0.238	-4.07	7.79	9.96	6.93	0.836	6.54	3.22	-2.75	1.97	1.01	1.32	0.768	-1.99	3.38	7.64	-0.0873	2.08	1.6	0.74	-2.12	-6.15	-0.032	2.8	0.466	2.02	5.35
cg00302160	8	10030945	MSRA;MSRA;MSRA	4482	5	green	3.43	-6.09	-10.1	0.766	17.6	0.58	13.7	4.19	3.01	8.37	-1.25	0.581	10.6	-3.17	2.97	-2.8	0.927	-4.2	4.31	8.61	4.27	0.396	3.3	1.98	-0.188	0.265	0.373	0.475	0.176	0.43	2.99	2.98	0.223	1.89	2.18	-1.03	0.655	-5.34	0.933	2.22	1.46	3.21	4.7
cg00303641	16	23712764	ERN2	10595	8	pink	4.69	-0.918	-2.24	1.74	8.1	1.02	8.42	18.7	3.97	5.78	-2.42	2.58	6.99	1.72	3.01	1.16	0.917	0.845	11.7	6.22	9.34	-0.557	9.56	5.74	-4.69	4.14	1.31	4.19	2.77	-4.52	1.14	10.7	0.72	2.02	1.88	2.1	-4.32	-4.1	-0.578	2.65	1.21	1.1	3.24
cg00304185	16	1033074	SOX8	30812	4	yellow	-2.18	15.5	7.19	18.2	-3.24	5.61	-2.04	-0.169	-8.01	-10.6	4.73	-10.9	6.49	-2.6	0.751	11.3	1.29	0.487	-1.62	-1.97	-1.92	4.04	-7.52	3.39	4.84	5.46	0.332	-2.1	2.42	6.07	2.8	0.595	0.875	0.278	-1.65	1.61	1.45	11	10.4	1.31	-0.757	-5.73	-0.696
cg00305281	22	42316176		NA	3	brown	-0.498	11.4	17.1	6.79	-6.63	6.15	-4.04	1.95	0.183	-2.51	3.91	1.47	0.62	9.25	-0.677	14.5	3.53	9.19	0.0448	1.89	0.0773	2.42	2.02	7.21	4.21	8.56	2.78	6.36	10.1	6.06	0.323	-0.444	3.42	0.74	-0.016	1.65	-0.0661	6.78	2.69	1	1.41	-1.37	-1.95
cg00305629	9	117265998	DFNB31;DFNB31	25861	4	yellow	-1.62	22.7	13.8	16.3	-8.25	4.88	-4.42	1.88	-6.26	-13	4.06	-8.11	2.84	0.819	0.105	14.9	1.79	4.24	0.0816	-3.34	-0.843	3.14	-5.42	5.61	3.42	6.92	1.41	0.74	4.28	4.34	1.81	1.08	1.26	0.193	-0.932	2.05	0.343	11.7	8.11	0.758	-0.256	-6.65	-3.03
cg00305774	1	1361077	TMEM88B	643965	2	blue	-0.665	21.3	10.1	14.4	-10.7	1.24	-5.68	0.566	-7.56	-19	1.48	-11.9	0.326	-3.07	-1.14	9.17	1.45	2.89	-0.0248	-8.55	-0.724	0.449	-8.28	2.1	1.85	2.35	1.72	-2.44	-0.845	1.06	0.314	0.352	-0.824	-1.24	-2.87	0.481	-0.0716	11	8	-1.59	-2.33	-7.77	-4.67
cg00306523	8	94257369		NA	2	blue	-0.49	20.9	10.9	13.3	-11.2	1.74	-6.08	-1.86	-6.59	-17.3	2.77	-10.7	-0.292	-2.3	-1.82	8.93	2.01	4.27	-0.955	-8.89	-2.76	1.49	-9.16	2.14	4.59	1.67	3.06	-2.76	-0.686	3.32	2.28	-0.984	-0.693	-0.973	-3.3	0.0952	2.09	12.2	7.16	-1	-2.01	-6.45	-4.34
cg00307276	16	15689899	KIAA0430	9665	13	salmon	0.209	-2.7	-8.39	5.6	17.5	3.7	11.3	5.49	-1.59	5.1	1.96	-3.22	16.9	-4.49	3.31	0.11	-1.27	-6.82	2.97	9.04	2.42	3.42	1.16	2.47	-0.413	4.09	-1.29	-0.716	-0.205	1.51	3.79	5.22	-1	0.609	-0.608	-1.02	1.17	-2.35	2.34	3.02	-0.843	-0.292	4.75
cg00307497	2	207976271	KLF7	8609	2	blue	-1.06	22.7	11.7	17.1	-7.26	4.44	-3.4	1.99	-6.33	-13.4	4.12	-9.44	3.26	-0.621	0.322	12.9	1.56	4.53	1.03	-4.28	-1.09	3.61	-6.12	4.94	3.85	5.88	1.97	0.0589	2.66	4.12	3.45	2.11	0.846	0.53	-1.84	0.885	1.21	12.7	8.12	0.128	-1.06	-6.57	-4.04
cg00307662	16	29917305	ASPHD1	253982	5	green	-0.529	-9.44	-15.7	-0.496	19.3	0.589	10.5	1.93	-0.882	7.28	1.13	-1.51	10.3	-6.55	2.55	-6.19	-3.48	-9.99	1.35	6.92	-0.0312	2.98	0.145	-1.96	-1.33	-0.455	-2.29	-3.25	-3.14	-0.662	3.97	4.6	-2.04	0.189	0.373	-0.996	0.614	-4.13	-0.395	2.39	-0.35	2.41	6.18
cg00307737	7	124402490	GPR37	2861	2	blue	0.119	25.2	11.9	15.1	-9.86	2.09	-4.68	-0.111	-6.04	-16.5	2.01	-10.2	0.872	-1.45	-0.915	11.2	1.14	5.5	0.4	-6.88	-0.884	2.59	-7.54	3.91	2.98	3.56	3.02	-0.656	0.947	3.37	3.42	-0.133	0.397	-0.235	-2.15	0.323	0.803	13.4	8.41	-0.956	-0.959	-7.24	-3.78
cg00308503	5	160171384	ATP10B	23120	2	blue	-3.86	22.7	14.1	14.7	-11.1	4.87	-7.96	-0.635	-8.99	-15.6	4.81	-9.24	1.17	0.202	-0.948	12.8	0.437	2.86	-2.81	-5.75	-2.91	3.52	-7.42	2.86	3.28	5.9	0.404	-0.428	2.18	4.41	0.793	-0.238	0.169	-0.925	-2.22	1.06	0.305	12.8	6.76	-0.225	-1.68	-6.9	-3.87
cg00309313	3	54634169	CACNA2D3	55799	4	yellow	-0.448	14.4	6.08	18.9	-0.72	5.97	0.893	2.26	-5.77	-8.23	3.29	-9.67	8.54	-2.16	1.05	11.4	1.58	1.56	0.868	0.0904	0.564	3.78	-5.03	5.04	3.97	6.18	1.66	-0.307	3.29	5.87	3.61	1.78	-0.113	0.04	-1.97	0.922	0.48	9.24	8.33	1.8	-1.18	-5.73	0.0559
cg00310412	15	74724918	SEMA7A;SEMA7A;SEMA7A	8482	13	salmon	1.2	1.97	-3.75	10.1	11.9	4.24	9.53	4.62	-2.2	2.03	1.9	-5.11	17.7	-3.61	3.42	4.43	0.484	-4.18	2.93	8.15	2.81	3.43	0.079	4.84	1.44	5.45	0.0788	0.688	2.43	3.56	4.18	3.41	-0.793	0.225	-0.098	-0.45	1.64	0.52	5.02	3.76	-0.71	-2.39	5.21
cg00310523	12	86230176	RASSF9;RASSF9	9182	3	brown	-1.14	9.83	18.4	5.28	-7.97	5.5	-5.45	0.469	0.73	-2.13	4.22	2.93	-1.45	10.4	0.272	14.6	4.09	9.35	-1.18	1.81	-0.99	2.28	1.85	6.84	5.01	7.81	0.644	6.03	11.5	6.18	-0.574	-1.62	4.66	1.9	0.618	1.35	0.795	6.73	2.82	1.8	2.07	-1.23	-2.17
cg00311921	22	19119464	TSSK2;DGCR14	NA	22	darkgreen	-13.6	1.04	1.71	2.79	0.056	10.9	-5.72	-3.25	-8.32	-0.933	12.4	-0.521	3.19	2.14	-1.53	3.92	-14.1	-4.58	-7.26	3.97	-10.6	24.5	-3.61	-2.35	1.28	9.68	-4.05	-0.345	2.78	7.67	10.7	5.79	2.34	0.268	2.03	1.33	1.2	12.4	2.19	0.963	2.39	0.307	5.24
cg00313685	7	101468882	CUX1;CUX1;CUX1	1523	5	green	-1.74	-7.73	-8.31	0.104	17.7	4.42	9.66	2.49	-0.000999	9.48	3.54	2.21	10.4	-0.943	2.67	-0.632	-2.39	-6.54	0.363	12.7	-0.29	4.39	2.93	0.915	0.435	3.89	-2.47	0.973	3.2	2.6	2.87	3.96	1.64	1.51	2.88	0.221	0.896	-3.05	0.415	4.15	1.67	3.18	7.07
cg00314003	11	126873943		NA	10	purple	1.43	-11.1	-4.92	-8.35	10.3	1.64	5.79	2.67	7.73	17.7	-0.578	12	2.51	6.15	1.28	-3.92	0.124	0.408	1.95	11.2	2.71	0.424	10.1	1.96	-1.24	1.78	-0.663	5.23	3.86	1.14	-0.0828	1.02	3.57	2.69	4.4	0.858	0.431	-8.14	-4.13	2.09	3.7	10.6	4.31
cg00314622	3	12199836	SYN2;TIMP4;SYN2	NA	2	blue	-0.154	18.2	10.8	13	-7.66	2.44	-4.5	1.78	-5.06	-10.9	1.29	-7.49	2.19	0.164	-0.124	9.74	1.86	4.32	0.575	-5.09	0.87	1.12	-4.21	3.81	1.93	4.29	2.11	-0.325	1.03	2.38	0.662	0.371	-0.111	-1.3	-2.63	0.552	-0.242	8.92	6.9	-0.00137	-1.98	-5.34	-3.44
cg00315394	5	179232165	MGAT4B;SQSTM1	NA	5	green	4.78	-4.36	-7.58	1.85	19.2	1.86	15.2	5.93	4.58	10.3	-0.222	1.87	13	-0.744	4.4	-0.647	2.91	-2.23	6.09	10.9	4.79	0.864	5.51	7.13	0.832	2.88	0.806	3.84	2.22	1.93	4.43	2.86	1.85	3.54	2.99	0.153	1.14	-5.39	2.02	4.15	3.09	2.72	5.67
cg00315487	3	44906755	TMEM42	131616	3	brown	-3.02	18.6	16.7	10.1	-12.1	4.96	-8.67	-0.666	-5.13	-11.4	4.39	-4.38	-0.967	3.8	-1.12	13.2	1.82	6.02	-2.47	-4.05	-2.22	2.52	-4.26	4.18	3.88	6.4	0.538	2.04	4.11	5.08	-0.467	-1.32	1.6	-0.576	-0.907	0.729	0.158	11.2	5.22	-0.272	-0.962	-4.02	-4.4
cg00315563	3	182243039		NA	3	brown	-0.71	17.5	17.2	8.37	-12.1	3.72	-6.98	-0.531	-2.3	-10	3.2	-3.01	-2.2	4.58	-1.76	12.5	2.49	8.75	-0.745	-3.89	-1.49	2.12	-3.2	4.89	4.37	5.44	2.76	3.03	4.75	5.14	1.15	-1.47	3.19	1.54	0.327	0.899	2.25	10.3	5.66	-1.4	1.9	-2.54	-3.46
cg00319893	1	181526714	CACNA1E	777	4	yellow	-3.21	19.2	17.6	13.1	-9.38	7.43	-6.22	0.0514	-5.24	-9.95	5.89	-4.74	1.47	3.94	-0.0438	17.1	1.45	5.77	-2	-1.28	-2.46	4.93	-4.13	5.25	5.19	8.52	0.744	2.95	6.58	7.27	2.22	0.163	1.96	0.658	-0.32	0.456	0.156	12.9	5.92	1.27	0.867	-4.77	-2.22
cg00320094	1	68695183	GPR177;GPR177	NA	10	purple	4.67	-9.27	-4.03	-7.38	9.96	0.738	8.44	4.37	11.1	18	-1.65	12	3.02	6.34	2.93	-3.25	2.19	2.64	4.89	10.2	4.59	-0.756	12.1	3.75	-0.463	1.25	0.876	6.33	3.51	0.812	1.16	1.11	2.83	3.26	3.55	0.773	0.0828	-9.13	-4.49	3.68	3.84	7.92	5.54
cg00321007	17	15340112	CDRT4	284040	2	blue	-2.04	25	15.5	14.2	-11.6	4.09	-7.93	0.254	-6.75	-14.2	3.74	-7.84	0.675	1.32	0.234	12.8	2.33	4.72	-1.54	-6.13	-1.51	1.91	-5.5	4.44	3.65	5.51	0.53	0.0391	2.3	4.05	0.0812	-0.611	0.789	-0.594	-1.74	1.88	0.846	11.6	6.83	0.547	-0.788	-6.39	-4.53
cg00321115	13	28942568	FLT1;FLT1	2321	8	pink	3.29	2.66	0.998	4.61	6.01	3.38	6.57	19.6	2.84	3.53	-0.112	1.27	7.75	2.92	1.42	4.33	-2.35	2.71	11.9	6.23	7.66	4.16	8.16	6.63	-4.12	7.4	2.98	5.18	4.25	-2.28	5.86	16	1.37	1.99	1.7	2.03	-4.99	1.93	1.68	1.47	1.89	0.148	3.38
cg00321478	1	197238398	CRB1	23418	4	yellow	-4.35	17.2	8.41	20.5	-4.48	6.59	-3.81	-0.0075	-10.7	-12.8	5.61	-12	6.47	-2.35	-0.751	12.8	-0.111	-0.592	-2.85	-2.16	-2.57	4.72	-8.26	3.02	3.18	7.34	0.29	-1.96	2.7	5.53	1.73	0.564	0.0747	-1.47	-1.98	0.685	0.945	11.6	8.93	0.156	-2.1	-7.43	-2.14
cg00321619	9	131153847		NA	2	blue	-3.04	25.6	13	16.4	-10.7	4.08	-7	-0.276	-9.14	-17.9	3.87	-10.9	1.49	-1.14	-1.07	12.5	0.152	2.86	-1.94	-6.29	-2.13	3.43	-8.32	2.55	2.73	5.35	0.862	-1.24	1.37	3.81	1.46	0.354	0.252	-0.88	-1.83	0.0165	0.617	14	8.34	-0.767	-1.54	-7.69	-3.83
cg00321901	8	10512459	RP1L1;RP1L1	94137	3	brown	-0.164	7.81	17.7	2.05	-7.06	5.65	-5.02	3.06	3.05	0.742	3.22	7.15	-2.12	16.1	0.15	12	3.18	11.9	0.846	3.08	1.01	2.82	5.91	8.94	2.95	9.64	1.61	10.1	12.5	5.46	0.173	0.0505	6.16	2.91	3.17	2.48	-0.0769	4.92	1.56	2.28	4.82	1.99	-0.24
cg00322262	4	8085866	ABLIM2;ABLIM2;ABLIM2;ABLIM2;ABLIM2;ABLIM2;ABLIM2	84448	5	green	0.545	-10	-11.4	-1.7	22.2	2.51	12.6	3.24	2.58	12.6	0.171	3.23	10.5	-1.33	2.87	-3.59	-0.972	-5.92	1.83	12.6	2.55	2.18	4.71	0.923	-0.285	1.91	-1.36	1.4	1.63	1.41	2.36	3.08	0.00285	1.45	1.8	-0.401	0.382	-6.55	-1.89	3.43	0.869	3.98	6.54
cg00323501	22	37464839	TMPRSS6	164656	3	brown	-1.87	11.7	22	5.32	-11.5	5.2	-8.29	-0.273	-0.786	-4.53	3.79	1.91	-2.88	9.98	-0.658	14.3	3.54	9.49	-2.27	-0.543	-1.29	1.44	0.858	5.51	4.44	7.17	0.869	5.28	9.43	5.64	-1.87	-2.48	3.93	1.3	0.584	2.08	0.293	7.05	2.44	1.46	2.21	-0.993	-1.99
cg00324719	8	1155602		NA	1	turquoise	6.9	1.13	-0.217	1.82	4.58	-1.61	7.23	18.8	5.4	3.35	-5.17	1.99	4.18	2.14	1.34	1.4	1.04	3.64	14.2	3.28	11.8	-1.96	9.48	6.96	-6.26	3.07	4.22	5.02	2.01	-6.19	1.43	9.54	0.537	0.881	0.495	2.48	-4.45	-2.7	-0.091	0.768	0.566	-0.127	1.06
cg00324725	16	56581212		NA	2	blue	-4.35	17.5	15.2	12.9	-8.18	7.94	-6.81	1.07	-6.5	-9.14	5.95	-4.58	2.52	4.02	-0.101	15.1	0.995	4.11	-2.45	-1.59	-2.04	4.69	-3.52	4.29	3.97	8.67	0.203	1.74	5.75	6.27	0.961	1.2	1.17	-0.492	-1.42	1.01	0.284	11.9	5.66	1.57	-0.834	-4.2	-2.42
cg00326785	7	22395217	RAPGEF5	9771	5	green	1.12	-8.73	-13.2	0.0676	23.2	1.66	13.9	4.42	1.11	9.83	-0.3	0.371	12.2	-3.97	2.64	-4.11	-1.75	-7.59	2.93	10.2	3.2	1.87	3.4	0.864	-2.66	1.46	-0.985	-0.0183	-0.197	-0.146	2.77	3.78	-0.375	0.713	1.75	0.442	-0.942	-6.76	-0.262	2.7	0.235	2.44	6.32
cg00327263	2	120019111	STEAP3;STEAP3;STEAP3	55240	8	pink	8.32	1.23	-0.426	1.59	4.24	-2.95	7.92	21	6.17	3.02	-6.01	1.66	3.49	1.45	0.978	0.927	1.77	4.25	17	2.33	12.6	-3.06	9.48	6.86	-6.2	1.74	4.83	4.3	1.61	-7.85	1.3	10.4	0.437	1.22	1.31	1.91	-5.12	-3.06	0.375	-0.304	0.878	-0.0213	0.436
cg00327697	8	24076220		NA	3	brown	-2.94	13.9	22	6	-14.4	4.85	-10.6	-0.795	-2.69	-7.67	3.51	-0.317	-3.8	7.5	-0.935	13.3	1.85	8.18	-3.05	-3	-1.76	1.94	-0.876	3.75	3.23	6.34	0.168	3.24	6.96	4.71	-1.66	-1.88	2.83	0.471	0.00969	1.39	0.163	8.92	2.98	0.185	1.51	-3	-3.69
cg00328219	8	29033680	KIF13B	23303	4	yellow	0.314	18.7	10	15.7	-5.67	3.69	-1.14	1.43	-4.76	-11.7	2.27	-8.63	3.6	-0.98	-0.249	12.7	1.43	4.14	1.07	-2.75	0.186	2.64	-5.51	4.51	2.8	4.86	2.74	0.259	3.7	4.07	2.99	0.741	0.415	0.312	-1.1	0.439	0.326	10.8	7.58	-0.0246	-0.267	-7.62	-1.75
cg00328227	1	109204325	C1orf59;C1orf59	NA	5	green	2.1	-12.1	-7.02	-6.97	14.9	1.83	9.89	4.08	8.09	18.9	0.429	10.6	4.82	4.44	3.36	-2.99	1.7	-1.09	3.26	14.2	2.83	0.637	10.2	4.15	0.459	2.33	-1.12	6.68	4.78	1.24	1.31	2.09	4.01	5.26	4.67	-0.846	1.84	-9	-3.14	3.21	5.18	7.47	6.06
cg00328497	20	60551707	TAF4	6874	2	blue	-2.04	28.1	14.2	16.7	-10.7	4.08	-6.35	-0.312	-7.96	-16.8	4.18	-10.1	1.67	-0.346	-0.79	13.2	1.91	3.9	-1.41	-6.14	-2.16	2.88	-7.76	4.54	4.08	5.45	1.65	-0.246	1.86	4.63	1.79	-0.486	0.809	-0.124	-1.71	0.665	1.05	13.5	8.67	-0.534	-0.825	-7.19	-4.22
cg00332048	7	18535072	HDAC9;HDAC9;HDAC9;HDAC9;HDAC9	9734	4	yellow	-3.32	13.6	6.91	17.6	-2.56	6.38	-2.29	0.822	-8.59	-9.73	4.48	-10.2	7.08	-1.97	-0.532	11.2	-0.628	-0.368	-1.77	-0.938	-1.38	4.86	-6.53	2.64	2.82	6.8	0.442	-1.57	3.03	5.4	2.44	1.67	0.559	-0.708	-1.64	0.254	1.32	10.1	8.47	0.531	-1.79	-5.93	-0.207
cg00332509	16	89363830	ANKRD11	29123	2	blue	-3.33	21.4	11.6	17.3	-7.24	5.95	-5.58	0.113	-8.62	-13	4.99	-9.46	4.06	-0.0739	-0.462	13.1	0.253	2.3	-2.12	-3.52	-2.14	4.6	-6.84	3.57	3.83	6.99	0.531	-0.613	2.56	5.65	2.24	0.803	-0.566	-1.81	-2.6	0.777	0.756	13.7	7.6	-0.00602	-1.83	-6.12	-2.81
cg00333622	20	33459477	GGT7	2686	5	green	0.638	-3.58	-9.15	4.78	19.8	3.62	11.9	4.32	-0.818	7.04	1.78	-2.12	18	-3.86	4.29	-0.468	0.177	-6.76	2.39	9.98	2.44	2.47	1.49	3.52	0.144	3.91	-1.49	0.22	-0.242	2.37	3.04	3.05	-0.425	0.978	0.212	-0.305	1.55	-4.02	2.17	4.24	-0.0607	1.9	4.82
cg00333946	15	99975310		NA	4	yellow	0.144	17.2	9	19.3	-2.45	5.28	-0.259	1.89	-4.98	-8.53	3.46	-8.94	7.14	-0.66	0.784	14	3.04	3.07	0.665	-0.151	0.354	3.13	-4.81	6.68	5.25	6.57	2.2	0.452	4.73	6.05	3.14	0.933	0.785	0.204	-1.41	0.495	1.46	9.54	9.15	1.19	-0.239	-4.97	-1.12
cg00334063	3	147106010	ZIC4;ZIC4;ZIC4;ZIC4;ZIC4	84107	42	lightcyan1	-0.556	-5.22	-3.97	-4.13	3.46	-0.289	1.57	-1.59	1.84	4.25	0.51	2.44	0.211	-0.157	0.205	-4.17	-1.45	-1.25	-0.617	2.08	-1.34	1.16	0.733	-2.39	0.745	-1.31	-0.804	-0.115	-1.61	0.361	1.24	0.511	0.116	1.98	0.98	-2.08	2.31	-2.1	-1.83	0.475	1.21	18.2	4.03
cg00334498	7	91603056	AKAP9;AKAP9	10142	2	blue	4.74	18.1	9.47	12.3	-7.42	0.0835	-1.75	2.61	-1.37	-10.8	-1.95	-7.68	1.38	-1.06	-0.693	8.18	3.81	7.45	4.03	-6.48	3.81	-1.27	-3.36	5.2	1.42	1.51	5.3	-0.412	0.139	1.45	1.7	-0.559	-0.17	-0.221	-1.87	0.509	-0.195	6.99	6.36	-1.31	-1.75	-5.8	-4.52
cg00334507	16	29824599	PRRT2	112476	5	green	0.56	-8.68	-8.07	-1.86	17.7	3.77	10.7	4.62	3.49	13.7	1.17	5.25	10.1	1.66	2.83	-2.09	-1.82	-3.79	2.64	13.8	2.84	3.18	6.58	2.02	-1.43	3.82	-0.909	3.14	3.23	1.87	2.59	4.17	1.87	2.18	3.43	0.543	-1.6	-5.52	-1.13	3.46	3.16	6.29	8.14
cg00334821	7	73508994	LIMK1	3984	3	brown	-1.24	10.6	19.8	5.11	-8.12	5.8	-6.18	1.67	0.566	-2.09	3.85	3.26	-1.07	11.3	-0.49	14.4	2.9	10.3	-0.453	1.34	-0.0728	2.84	2.74	7.03	4.11	8.75	1.76	6.71	10.4	5.82	0.104	-0.198	3.96	1.59	-0.122	0.426	-0.86	7.11	1.74	1.3	1.43	0.946	-1.6
cg00335219	16	86012305		NA	5	green	2.89	-7.36	-7.68	-1.24	17.7	2.66	13.2	3.67	5.36	12.8	0.446	4.83	9.46	0.997	3.63	-1.26	2.32	-2.22	3.74	13.1	3.22	1.16	6.36	4.99	1.87	2.4	0.0737	5.6	3.93	3	3.37	1.63	1.8	3.53	2.42	-1.6	2.06	-6.55	-0.99	3.49	2.88	5.82	6.35
cg00335361	1	174417375	GPR52;RABGAP1L	NA	2	blue	0.288	22.2	9.97	17.3	-6.92	3.07	-3.1	1.4	-6.11	-14.2	1.55	-11	3.45	-2	-0.363	11	1.98	4.04	0.811	-5.12	0.733	1.46	-6.61	3.99	2.27	4.39	2.82	-0.963	1.11	3.47	1.57	0.0431	-0.275	-0.778	-2.39	0.416	0.313	10.2	8.27	-0.595	-2.17	-5.83	-3.54
cg00338002	1	28198813	C1orf38;C1orf38;C1orf38	NA	2	blue	-2.7	15.7	17.5	10.1	-8.71	7.06	-6.58	0.584	-3.87	-6.83	5.78	-2.22	1.37	6.07	0.467	15.7	2.29	6.14	-1.9	-0.783	-2.16	3.96	-1.79	5.85	5.37	8.61	0.224	3.46	7.01	6.75	1.02	-0.193	2.84	1.15	0.377	0.58	1.58	10.2	5.58	1.66	1.4	-2.58	-1.41
cg00338529	2	134948022		NA	2	blue	2.83	17.4	9.7	12.5	-7.31	0.759	-2.3	0.61	-2.7	-11.2	-0.511	-7.64	1.44	-0.8	0.956	9.27	4.03	6.21	1.52	-5.51	1.73	-0.946	-4.81	4.3	2.6	2.12	2.98	-0.752	1.42	2.57	0.628	-2.03	-0.161	-0.632	-2.02	0.596	0.395	7.43	6.17	0.242	-1.39	-4.91	-4.27
cg00339241	15	41196012	VPS18	57617	5	green	-0.726	-1.99	-4.73	5.66	15.2	7.33	9.19	4.13	-1.05	6.77	3.92	-0.311	17.3	-0.323	3.09	3.44	-0.27	-4.38	1.19	13.1	1.3	5.1	2.34	4.3	2.32	7.09	-0.88	1.57	4.32	5.34	3.82	3.75	0.353	1.47	1.48	0.0806	0.834	-1.07	1.56	4.41	0.198	2.86	6.4
cg00339415	9	136085771	OBP2B	29989	2	blue	-2.38	25.3	13.2	20.2	-7.06	6.02	-4.39	0.349	-8.02	-13.5	5.44	-10	4.52	-0.00192	-0.218	15.4	1.66	3.31	-1.28	-3.31	-2.2	4.49	-7.08	5.65	4.76	7.42	1.56	0.188	3.64	6.35	3.07	0.301	1.81	0.44	-0.937	0.981	1.79	13.9	9.97	0.899	-0.354	-7	-2.33
cg00339913	8	22085227	PHYHIP;PHYHIP	9796	4	yellow	-1.13	13.6	6.67	19.2	-0.0276	5.97	0.585	2.54	-6.03	-7.04	4.29	-8.56	9.49	-0.746	1.35	13	2.02	0.992	0.226	1.56	0.205	3.8	-4.34	6.14	3.92	7.75	0.707	0.406	5.3	5.82	2.55	1.59	1.13	0.299	-1.23	-0.384	1.6	8.55	8.76	1.66	-1.07	-4.66	-0.459
cg00340928	18	74630659	ZNF236	7776	8	pink	7	0.781	0.121	1.35	5.05	-0.802	7.65	19.3	6.41	4.57	-4.12	3.07	4.3	3.07	1.08	1.44	-0.537	4.5	15.4	4.3	10.6	0.752	10.3	6.49	-5.53	3.71	4.6	5.14	2.69	-5.18	4.64	13.2	1.35	2.56	2.2	2.32	-5.75	-0.696	0.445	0.764	2.2	1.28	2.66
cg00340958	20	48328658	B4GALT5	9334	10	purple	1.67	-12	-8.96	-5.27	17.4	2.12	10	4.12	5.74	18.2	-0.19	7.67	7.29	2.51	3.02	-4.4	0.293	-3.16	2.65	12.6	3.4	0.708	9.01	2.25	-1.23	1.99	-1.01	3.35	2.7	0.77	0.692	2.19	1.14	1.1	2.78	1.43	-0.403	-9.23	-4.32	3.77	2.17	6.3	5.77
cg00341191	10	126332072	FAM53B	9679	2	blue	-1.82	21.9	10.6	20	-5.75	4.94	-3.93	0.792	-8.09	-12.5	4.22	-10.9	5.33	-1.23	0.356	12.9	2.29	2.21	-1.05	-3.54	-1.07	3.05	-6.96	5.03	4.69	6.02	1.07	-0.97	2.38	5.2	2.01	0.437	0.321	-0.396	-2.31	0.432	1.43	11.5	9.54	0.828	-1.19	-5.98	-2.58
cg00341732	22	31479561	SMTN;SMTN;SMTN	6525	2	blue	-1.47	22.2	14.8	12.9	-9.88	4.66	-6.26	0.65	-5.04	-11.5	4.08	-6.16	1.22	2.41	-0.0632	13.3	1.71	5.75	-0.651	-4.17	-1.26	3.12	-4.24	5.74	3.4	6.77	1.3	1.75	3.11	5.1	1.75	-0.362	1.51	0.387	-0.684	1.99	0.756	11.3	6.9	0.194	0.556	-5.02	-3.38
cg00343414	11	109292465	C11orf87	399947	5	green	1.92	-10.6	-16.4	-1.66	21.3	-0.342	13.7	2.61	1.75	9.1	-0.998	-0.16	9.32	-6.09	2.94	-7.04	-0.895	-8.13	2.93	7.46	2.1	0.604	1.73	-1.38	-0.521	-2.29	-1.17	-1.77	-2.7	-1.27	3.15	3.77	-1.8	1.22	0.396	-0.871	0.118	-6.72	-1.53	2.35	-0.341	2.58	5.06
cg00344308	3	30273887		NA	2	blue	1.86	20.1	10.8	13.4	-8.54	1.69	-3.62	0.944	-3.98	-13	0.626	-8.78	1.26	-0.878	-0.312	9.9	4.28	5.75	1.19	-6.2	0.957	-0.935	-5.59	4.64	2.87	2.7	3.22	0.00531	1.04	2.79	0.0199	-1.86	-0.685	-0.643	-3.39	0.162	0.703	7.74	5.89	-0.895	-2.71	-5.93	-5.4
cg00344482	19	38658072	SIPA1L3	23094	2	blue	-2.18	25.2	12.8	16	-9.71	4.42	-6.31	-0.329	-7.88	-15.2	3.84	-9.91	2.19	-0.377	-1.18	12.3	1.22	3.69	-1.68	-5.62	-1.84	2.97	-7.45	3.61	3.38	5.51	1.7	-0.531	1.47	4.8	1.43	-0.569	-0.497	-1.71	-2.85	-0.0613	0.868	12.7	7.19	-0.619	-2.1	-6.97	-4.16
cg00344577	17	79504745		NA	3	brown	-1.54	13.6	21.5	7.81	-9.75	5.84	-6.99	1.27	-1.22	-4.56	4.12	0.956	-0.54	9.48	-0.292	16.5	3.96	8.93	-1.26	-0.0541	-0.523	2.04	1.01	6.92	4.84	8.55	0.898	4.93	9.51	5.86	-1.08	-1.11	3.5	1.4	0.387	1.24	1.37	7.56	2.97	1.27	2.14	-1.75	-2.29
cg00344888	15	58699976		NA	2	blue	-2.11	27.1	13.5	16.4	-10.5	3.62	-6.14	0.117	-7.99	-17.5	3.63	-10.4	1.41	-0.813	-0.91	12.7	0.302	4	-0.84	-6.24	-1.9	3.32	-7.86	3.42	2.81	5.21	1.59	-0.634	1.53	3.8	2.28	0.483	0.108	-1.08	-1.99	0.531	0.768	14.1	8.18	-0.613	-1.51	-7.05	-3.58
cg00346180	19	50189880	PRMT1;PRMT1;PRMT1	3276	5	green	4.78	-4.61	-7.02	1.19	18.7	1.83	14.8	5.52	5.44	10.6	0.153	2.54	12	0.121	4.52	-0.405	3.44	-1.18	5.88	11.6	4.34	0.72	5.58	7.81	1.62	3.3	1.14	4.52	2.65	2.53	4.08	2.05	1.3	2.95	1.39	0.264	1.63	-5.43	0.583	4.15	2.06	3.95	5.06
cg00347518	20	23337006		NA	8	pink	3.52	3.12	1.94	5.03	5.37	2.44	6.23	18.1	2.94	3.02	-1.44	1.4	6.95	3.37	1.5	5.37	0.0383	3.13	10.8	6.23	9.27	2.05	8.46	8.14	-3.89	7.35	2.56	5.33	5.3	-2.58	3.22	12.3	2.45	2.61	2.43	2.05	-4.73	0.832	2.44	2.04	2.78	0.0672	2.31
cg00347775	22	43829831	MPPED1	758	5	green	3.17	-5.81	-11.6	2.11	22.2	1.09	15.5	4.71	2.16	8.54	-0.687	-0.697	13.7	-4.25	3.05	-2.85	0.0766	-5.61	4.66	9.38	3.9	1.35	2.77	2.88	-0.845	1.14	0.462	0.746	-0.435	0.612	4.31	3.42	-0.288	1.45	1.13	-0.16	0.463	-5.25	1.67	2.89	0.556	2.51	6.17
cg00349460	X	153031002	PLXNB3;PLXNB3	5365	2	blue	-2.38	24.6	13.5	16.2	-9.62	4.66	-6.36	0.136	-7.84	-14.6	4.42	-9.35	2.05	0.0512	-0.0312	12.9	2.09	3.65	-1.64	-5.41	-1.83	2.69	-6.72	4.64	3.84	5.63	0.652	0.0523	2.18	4.65	1.08	-0.326	0.988	0.234	-1.73	1.29	0.868	12.3	8.24	0.441	-0.392	-6.85	-4.42
cg00349573	1	242611826	PLD5	200150	2	blue	1.84	21.9	10.9	15.5	-7.21	2.43	-2.7	0.683	-4.06	-12.3	1.39	-9.13	2.86	-0.794	-0.431	10.8	4.02	5.94	1.33	-5.19	0.64	0.298	-5.82	5.21	3.94	3.5	3.85	-0.153	1.47	4.11	1.5	-1.29	0.202	-0.5	-2.13	1.18	0.58	9.38	8.06	-0.399	-1.48	-5.18	-3.66
cg00349943	20	21500021		NA	10	purple	2.57	-19.6	-10.9	-12.1	14	-1.32	9.08	2.3	9.04	21.2	-2.1	11.5	1.6	2.65	1.98	-8.2	0.0187	-2.2	2.88	10.4	2.85	-0.906	9.76	-0.513	-1.28	-1.92	-0.905	3.52	1.49	-1.69	0.477	2.02	1.22	2.4	3	-0.529	-0.0128	-11.3	-6.09	2.34	2.72	8.29	6.09
cg00349948	8	703433		NA	5	green	1.81	-5.03	-8.75	1.67	18.1	3.44	12.3	4.45	2.52	8.88	1.45	1.07	12.6	-1.2	2.46	-1.59	-0.527	-3.86	3.71	10.6	2.62	3.35	4	4.41	-0.438	4.04	0.653	3.01	1.03	2.95	5.07	2.93	1.6	2.49	2.69	0.652	1.38	-4.16	1.53	2.68	2.21	3.21	6.57
cg00351047	19	15234963	ILVBL	10994	4	yellow	-2.22	17.6	10	18.8	-3.84	6.45	-2.18	1.12	-6.93	-9.88	4.99	-8.66	6.29	-0.24	0.512	14.6	1.83	2.14	-0.953	-0.734	-1.22	4.09	-5.82	5.18	4.79	7.19	0.864	-0.398	4.6	6.32	2.59	1.13	0.706	-0.295	-1.76	1.21	1.03	11.2	8.61	1.35	-0.981	-6.39	-1.95
cg00351119	6	143836747		NA	2	blue	0.631	19.9	11.2	15.5	-6.48	4.07	-2.59	1.49	-4.34	-10.6	2.68	-8.33	3.72	0.0567	-0.208	11.9	2.34	5.39	1.22	-3.65	-0.0216	2.76	-5.03	5.04	4.34	4.95	3.3	0.292	2.83	4.79	3.62	0.716	-0.0487	-0.36	-2.49	0.266	1.18	10.7	7.27	0.214	-1.25	-4.73	-2.59
cg00351283	1	89448431	RBMXL1;CCBL2;CCBL2;RBMXL1	NA	22	darkgreen	-5.76	4.76	3.96	5.73	0.747	10.2	-1.21	-0.799	-3.28	-0.739	9.3	-0.648	5.26	3.13	-1.77	6.61	-7.34	0.999	-2.05	4.34	-5.77	17.6	-1.83	2.3	3.36	9.67	1.38	2.34	4.02	9.56	13.6	5.21	3.96	2.48	2.3	1.53	2.12	13.2	4.93	0.867	2.77	0.177	4.17
cg00351537	19	7580275	ZNF358	140467	5	green	2.25	-10.1	-11.4	-2.15	23.5	2.09	14.2	3.88	4.34	14.2	-0.124	4.04	10.2	-1.02	3.26	-3.7	0.437	-4.58	3.31	12.7	3.35	1.2	5.83	2.85	-0.557	1.57	-0.547	2.36	1.75	1.45	2.75	2.33	1.06	2.66	2.62	0.239	0.386	-7.91	-1.48	3.19	2.22	4.98	5.64
cg00351554	17	210047		NA	2	blue	2.62	19.9	10	14	-7.61	1.01	-2.52	1.27	-3.53	-12.9	-0.55	-9.4	1.78	-1.63	-0.328	9.11	3.36	5.81	1.94	-6.31	2.03	-0.106	-5.42	4	2.44	2.15	3.9	-1.12	0.557	2.34	1.63	-0.571	-0.83	-0.68	-3.38	0.564	-0.176	9.01	7	-0.802	-2.25	-5.33	-3.74
cg00352652	16	88547533	ZFPM1	161882	4	yellow	-1.68	20.8	9.69	16.9	-8.19	2.9	-4.32	-1.56	-8.7	-17.5	3.28	-12.8	2.19	-3.39	-1.54	11	0.839	2.16	-1.54	-6.16	-2.58	2.75	-10.3	2.16	3.68	3.23	2.26	-2.91	0.82	3.94	2.61	-0.419	-1.03	-1.9	-3.18	-0.0673	0.641	13.9	8.65	-1.03	-2.67	-8.56	-3.57
cg00353571	19	49238653	RASIP1	54922	2	blue	-3.02	19	15.4	12.8	-8.04	6.96	-5.88	-0.625	-4.93	-8.99	7.04	-4.51	2.22	4.19	-0.369	15.2	1.06	5.82	-1.8	-1.64	-3.62	6.1	-4.26	6.64	5.71	8.7	1.4	2.48	5.49	8.18	4.16	-0.156	2.96	0.838	-0.378	1.33	1.59	14.2	7.43	0.946	1.18	-3.96	-1.98
cg00354437	16	87133690		NA	2	blue	-0.951	19.2	14.6	11.5	-9.97	3.59	-6.19	0.255	-4.14	-10.6	2.8	-5.37	0.635	2.66	-0.241	11.7	2.19	6.57	-0.553	-4.64	-0.738	2.06	-3.9	4.04	3.77	5.19	1.88	1.59	2.73	4.5	0.894	-0.656	1.65	0.233	-1.42	0.72	0.665	10.4	6.56	0.739	-0.227	-4.11	-2.43
cg00355613	6	32064956	TNXB	7148	2	blue	-2.3	17.3	10.4	14.4	-7.95	4.38	-5.06	-0.866	-7.68	-13.1	4.1	-9.83	2.15	-1.82	-0.594	10.7	1.14	2.29	-1.62	-5.06	-2.81	3.71	-8	1.16	6.44	3.3	1.34	-2.35	1.68	4.46	3.11	1.71	0.858	0.169	-0.369	0.714	0.871	13.6	9.82	0.735	-0.295	-5.58	-1.65
cg00355656	1	229692519	ABCB10	23456	4	yellow	-3.03	17.6	8	18	-4.72	5.48	-3.6	-0.154	-8.94	-12.4	4.78	-11.2	5.72	-2.21	-0.552	11	-0.0995	0.524	-1.95	-3.04	-2.14	4.75	-7.74	3.02	3.51	6.49	0.787	-1.56	1.05	5.51	2.75	0.757	0.711	-0.0639	-1.61	0.763	1.77	12.3	9.75	0.00957	-1.31	-6.28	-1.3
cg00355829	3	128326679		NA	2	blue	-1.41	17.2	12.2	13.8	-6.04	4.93	-4.28	2.09	-5.27	-8.29	4.44	-5.78	4.13	2.59	1.87	12.4	1.92	3.68	-0.272	-2.25	-0.687	3.36	-2.83	6.04	3.19	7.84	0.139	1.01	3.57	4.42	1.62	1.03	3.46	1.64	0.662	2.96	0.74	10	9.3	1.94	1.36	-5.22	-1.63
cg00356361	18	77286260	NFATC1;NFATC1;NFATC1;NFATC1	4772	3	brown	-1.03	15.4	17.1	10.5	-7.38	5.91	-4.46	1.9	-1.93	-6.21	4.17	-1.59	1.37	6.2	0.589	16.9	2.97	8.02	0.109	0.288	-0.256	2.91	-0.75	6.79	4.26	8.33	1.66	3.17	8.95	5.83	0.954	0.28	3.07	1.16	0.0433	2.07	-0.788	9.56	5.18	1.16	1.36	-4.36	-3.02
cg00357971	20	61923848	COL20A1	57642	2	blue	-3.81	18	13.8	11.7	-10.2	5.71	-8.52	-0.447	-7	-11.7	4.8	-6.09	0.82	2.54	-1.61	12.2	-0.29	4.03	-2.94	-3.89	-2.37	4.36	-4.87	3.38	2.44	7.61	0.814	1.01	3.04	5.18	0.737	-0.334	1.98	0.083	-1.25	1.01	0.485	12.9	6.26	-0.697	-0.266	-4.94	-2.53
cg00359110	12	75699252	CAPS2	84698	22	darkgreen	-5.18	0.759	1.07	2.3	2.87	8.01	0.156	-1.04	-1.88	2.17	8.36	1.17	4.41	2.46	-1.22	3.38	-8.5	-0.569	-1.56	5.43	-5.97	18.6	-0.53	0.991	3.16	7.28	0.617	1.91	3.53	7.71	16.3	6.48	3.42	2.72	2.7	1.07	1.62	10.1	2.57	1.23	3.62	1.07	6.21
cg00361176	7	75260791	HIP1	3092	2	blue	0.747	18.5	9.68	14.4	-4.9	3.93	-2.21	4.43	-4.04	-9.02	1.88	-7.2	4.71	0.742	0.298	10.5	1.69	4.7	2.66	-2.75	2.17	2.29	-2.62	6.31	1.15	6.57	2.87	1.89	1.73	2.96	2.13	2.35	0.157	-0.321	-2.14	1.36	-1.05	8.94	6.25	-0.482	-1.09	-3.64	-2.72
cg00362569	4	5724005	EVC	2121	2	blue	3.17	17.8	11.1	11.2	-6.39	0.916	-1.05	3.79	-1	-9.04	-0.142	-5.27	1.45	1.6	-0.902	10.5	2.63	8.55	4.44	-3.37	2.84	1.25	-2.08	6.64	1.47	4.63	4.84	2.91	3.57	1.78	3.15	1.6	0.642	0.183	-1.63	1.21	-0.783	9.06	6.14	-1.65	-0.214	-3.06	-2.66
cg00363312	7	139333296	HIPK2;HIPK2	28996	2	blue	0.0452	18.7	12.9	11.3	-9.44	2.47	-5.29	1.25	-4.41	-11.2	1.6	-6.58	0.412	1.41	-0.685	10.8	2.65	5.46	0.215	-4.96	0.31	0.542	-4.03	4.62	2.19	4.53	2.24	1.47	2.96	2.64	-0.271	-0.819	0.0377	-1.78	-2.23	0.817	-1.04	8.84	5.25	-0.428	-1.95	-5.04	-2.91
cg00364281	22	37654641		NA	8	pink	8.94	3.09	1.34	2.83	3.79	-1.19	7.88	18.7	6.71	2.84	-5.62	1.67	4.26	2.37	0.325	2.48	1.13	6.27	16.6	3.06	13	-1.01	9.37	7.37	-4.99	2.95	6.61	5.51	2.49	-4.68	3.89	10.4	0.437	1.16	0.513	1.79	-5.27	-0.606	0.937	-0.808	0.965	-0.0507	1.19
cg00365524	1	19992771	HTR6	3362	3	brown	-1.13	14.1	19.3	7.43	-10.4	4.31	-6.94	1.75	-1.42	-6.26	3.41	-0.17	-1.82	7.61	-0.209	14.3	3	8.97	-0.159	-1.52	-0.408	1.99	0.447	6.36	3.46	7.05	1.41	4.29	8.65	4.05	-0.177	0.0867	3.4	1.33	0.196	2.25	-0.833	8.81	4.53	0.356	1.02	-2.77	-3.29
cg00366359	11	79145542	ODZ4	NA	5	green	3.95	-9.95	-10.9	-2.83	21.9	0.824	16.3	5.74	6.51	14	-1.33	4.7	8.96	-0.446	3.1	-4.05	-0.893	-2.77	6.03	12.3	4.6	1.79	7.28	2.66	-2.12	1.4	0.845	3.04	1.85	-0.0911	4.71	4.46	0.951	2.35	2.85	0.195	-0.626	-7.01	-1.72	3.16	2.18	5.05	7.07
cg00369194	7	157950511	PTPRN2;PTPRN2;PTPRN2	5799	4	yellow	-3.42	18	12.7	14.6	-6.76	6.66	-4.96	0.316	-6.89	-10.4	5.49	-6.72	3.61	1.89	0.244	14.8	0.944	3.16	-2.16	-1.4	-2.09	4.67	-4.78	5.02	3.91	8.74	0.233	1.47	4.82	6.41	1.56	0.0885	1.8	-0.235	-1.28	1.6	0.974	11.6	7.35	1.21	-0.749	-5.54	-1.49
cg00370608	16	70784519	VAC14	55697	13	salmon	0.423	-1.43	-6.43	5.99	15.9	5.29	9.74	4.04	-0.895	6.29	3.05	-2.22	18.2	-2.4	2.67	1.07	-0.304	-4.89	2.22	9.59	1.59	4.13	1.62	4.62	1.07	5.48	0.392	1.05	0.861	4.4	4.81	2.95	-0.222	0.204	0.0479	0.66	1.68	-1.77	2.78	3.35	-0.109	1.77	4.97
cg00371061	2	10501297	HPCAL1;HPCAL1	3241	2	blue	-0.899	22.2	12	15.4	-8.28	3.58	-5.22	1.02	-6.22	-13	2.69	-8.81	2.31	0.012	-0.434	11.4	1.89	4.36	-0.266	-5.35	-0.348	2.15	-5.63	4.46	2.75	5.08	2.02	-0.348	1.93	3.76	1.3	0.124	0.52	-0.382	-2.49	1.91	-0.0737	11.2	7.45	0.189	-1.41	-6.37	-3.29
cg00371134	1	77912654	AK5;AK5	26289	9	magenta	7.1	-4.64	-0.532	-5.6	6.2	-0.542	7.79	13.7	13	12.3	-3.91	11.6	1.15	8.11	0.896	-1.11	-0.147	6.65	12.7	7.99	9.56	0.175	18.4	6.63	-5.18	3.33	4.43	8.95	4.43	-3.46	3.62	8.4	3.79	3.69	4.72	2.69	-3.71	-5.06	-3.31	0.344	5.42	5.42	3.29
cg00371418	17	35014438		NA	3	brown	0.719	12.2	19	5.32	-10.1	3.58	-5.53	1.6	1.23	-4.16	2.39	1.6	-2.68	8.71	-0.305	12.4	4.03	11.2	0.948	-1.11	0.397	1.38	1.59	6.62	4.41	5.55	2.28	5.55	8.23	4.32	0.675	-0.36	3.07	2.4	-0.521	0.439	0.284	7.37	2.68	0.879	2.11	-0.827	-1.82
cg00372692	2	204800409	ICOS	29851	8	pink	7.08	0.943	0.013	1.66	5.57	-0.286	8.05	21.9	6.22	4.51	-4.98	2.95	4.83	3.03	1.21	1.73	0.258	4.48	15.4	4.86	12.5	-0.755	10.9	6.57	-6.65	4.18	4.28	5.6	3.11	-5.46	2.08	11.6	1.02	1.64	1.44	2.26	-5.31	-2.37	-0.212	0.507	0.967	0.901	1.91
cg00373293	10	99897001	C10orf28	NA	8	pink	5.33	1.78	1.37	1.86	3.1	-1.06	5.37	17.5	4.62	2.81	-4.84	2.32	3.06	3.2	1.28	2.51	0.994	3.85	11.6	3.27	11.3	-1.96	9.25	6.14	-6.63	3.97	2.63	5.48	3.08	-6.01	-0.459	8.64	0.324	1.02	0.386	1.5	-6.24	-2.47	-0.986	0.149	0.704	-0.539	-0.0943
cg00373436	3	111721343	TAGLN3;TAGLN3;TAGLN3	29114	7	black	4.06	-3.96	-9.4	3.29	19.2	1.07	16	5.43	2.71	7.6	-0.877	-0.927	13.9	-3.29	2.38	-1.31	0.0789	-3.92	5.8	9.35	4.53	1.76	3.09	3.83	-0.981	2.1	2.09	1.51	0.416	0.854	5.23	3.69	-0.231	1.14	0.926	-1.16	0.793	-3.86	2.25	2.49	0.604	1.45	6.21
cg00374747	11	2907930	CDKN1C;CDKN1C;CDKN1C	1028	3	brown	-2.8	12.6	14.7	10.8	-4.43	8.36	-3.81	2.6	-2.94	-3.74	6.07	-0.831	4	7.21	-0.254	17.8	1.71	5.8	-0.832	3.18	-0.825	4.87	0.351	6.74	4.57	11.2	1.28	4.84	10.8	7.17	1.24	1.79	2.87	0.136	-0.667	0.0485	1.16	9.23	4.58	1.92	0.00842	-2.46	0.171
cg00375132	10	22768370		NA	4	yellow	-0.884	18.5	8.4	18.2	-4.91	4.58	-1.95	1.03	-7.03	-12.8	2.78	-11.3	5	-2.6	-0.693	11.7	-0.127	2.17	0.272	-3.14	-0.471	4.27	-7.19	3.42	2.76	5.29	2.74	-1.37	2.26	4.61	4.08	1.62	-0.245	-0.481	-1.69	0.538	0.197	12.2	8.71	-0.505	-1.63	-6.14	-1.37
cg00376910	15	89765061	RLBP1	6017	3	brown	-1.74	22	17.9	12.5	-11.7	4.1	-7.64	0.166	-5.1	-12.3	3.52	-5.51	-0.057	3.31	-0.858	14.1	2.61	6.37	-1.33	-4.9	-1.37	1.69	-4.39	4.71	3.51	6	1.52	1.02	4.03	4.42	-0.308	-1.16	1.19	-0.222	-1.91	0.831	1.07	10.9	5.85	-0.139	-0.754	-4.96	-4.96
cg00376979	21	34350727		NA	3	brown	0.159	18.9	13.4	11.6	-8.98	3.5	-4.36	0.534	-3.05	-10.8	2.04	-5.45	0.436	1.97	-0.57	12.4	2.42	7.3	0.431	-3.92	-0.109	2.1	-4.08	5.1	3.43	4.98	2.81	1.3	3.38	4.45	2.13	-0.591	1.76	0.48	-0.874	1.6	0.84	10.8	6.31	0.169	0.515	-4.05	-2.26
cg00377953	20	62101531	KCNQ2;KCNQ2;KCNQ2;KCNQ2;KCNQ2	3785	5	green	3.07	-2.83	-8.07	4.6	18.2	2.03	14.1	7.21	1.44	6.33	-0.446	-1.87	15.1	-3.63	2.53	-0.195	0.841	-4.17	5.76	8.89	5.13	1.3	3.13	3.93	-0.5	2.53	1.46	0.68	0.607	0.458	3.78	5.33	0.0351	1.43	0.495	-0.0841	0.122	-3.37	2.84	2.25	0.164	1.46	4.82
cg00378158	22	34314305	LARGE;LARGE	9215	5	green	0.249	-7.29	-11.8	1.16	20.9	2.44	11.2	3.46	-0.0697	9.69	0.928	-0.243	14	-3.69	3.75	-3.49	-0.881	-8.13	1.54	9.67	2.15	1.93	2.7	1.38	-0.98	2.14	-2.07	-0.336	-1.01	1.08	2.03	2.76	-1.45	0.101	0.0458	-0.207	0.236	-6.08	-0.248	3.75	-0.588	1.9	4.99
cg00379528	12	125350693		NA	8	pink	2.97	1.16	0.735	2.69	5.52	2.07	5.58	21.3	2.88	4.26	-2.04	2.53	5.96	3.59	2.16	3.39	-0.317	2.06	10.9	6.07	9.7	0.3	10	6.51	-6.19	6.65	1.25	5.39	4.46	-4.69	0.34	11.8	0.724	0.466	1.47	2.87	-6.88	-2.07	-0.394	2.04	0.701	-0.344	2.3
cg00379619	19	17793480	UNC13A	23025	2	blue	0.804	17.9	11	13.6	-6.69	2.76	-2.39	2.46	-3.81	-10.8	1.93	-7.09	2.34	0.302	-0.679	11.9	2.76	5.25	1.79	-3.57	0.72	1.55	-4.17	5.09	2.88	4.47	3.33	0.598	3.43	2.76	2.09	1.31	0.284	-0.0696	-1.66	0.799	-0.869	9.92	6.69	-0.271	-1.08	-5.3	-2.84
cg00379733	3	10486117	ATP2B2;ATP2B2	491	5	green	0.842	-7.86	-8.9	-0.11	23.4	4	12.9	3.95	2.99	13.4	1.83	3.65	12.7	0.323	3.33	-1.06	-0.746	-4.61	2.59	15.3	2.24	4.02	5.47	4.27	0.0585	4.65	-0.731	3.34	3.51	3.12	4.64	3.32	2.07	2.48	3.14	0.65	0.766	-4.98	0.113	4.06	2.51	4.56	7.61
cg00380904	6	20468372	E2F3	1871	2	blue	-2.88	25.4	13.6	16.4	-9.92	4.55	-6.88	0.604	-8.45	-15.6	4.47	-9.71	2.14	0.0682	-0.657	13	1.41	3.25	-1.54	-5.44	-1.93	2.88	-7.04	4.03	3.35	6.33	0.827	-0.32	2.02	4.08	0.623	0.263	0.372	-0.876	-2.45	0.569	0.964	12.6	7.93	-0.149	-1.67	-5.85	-3.67
cg00381789	11	424667	ANO9	338440	4	yellow	-1.1	14.9	7.33	17.2	-2.61	5.8	-1.26	2.41	-6.33	-9.14	4.19	-9.34	6.8	-1.46	0.458	11.6	-0.0813	1.3	0.581	-0.768	-0.301	4.59	-4.84	4.86	2.82	7	1.26	-0.247	2.97	5.08	3.84	2.48	0.167	-0.797	-0.818	0.815	0.971	10.2	8.01	0.702	-0.195	-5.35	0.572
cg00382470	6	38141572	BTBD9;BTBD9;BTBD9	114781	8	pink	5.78	1.26	1.26	1.79	4.93	0.037	6.79	22.8	5.45	4.77	-3.82	3.76	4.62	4.56	0.99	2.98	0.451	4.16	14.3	5.35	11.7	-0.166	11.9	8.06	-6.05	5.46	4.18	6.49	4.23	-5.32	2.03	12.1	1.78	1.66	2.47	2.97	-5.84	-1.73	0.073	0.254	2.16	0.612	1.44
cg00382999	3	136649333	NCK1	4690	3	brown	-2.1	12.5	19.4	5.98	-10.2	6.91	-7.34	0.622	-1.05	-4.69	4.41	1.37	-1.73	9.34	-0.691	13.7	1.98	8.95	-1.58	-0.288	-1.36	3.36	0.636	5.64	3.95	8.29	1.53	5.28	8.29	6.54	0.333	-0.919	3.3	1.01	0.512	1.58	0.0627	8.14	2.19	1.41	1.65	-1.12	-2.02
cg00383220	11	118963880	HMBS;HMBS	3145	4	yellow	-2.58	12.9	6.77	17.2	-0.838	6.08	-0.628	2.33	-7.25	-7.33	4.93	-8.22	8.26	-0.853	0.416	12.8	0.302	-0.188	-0.507	1.3	-0.847	4.66	-4.69	4.52	3.33	7.6	0.245	-0.597	5.31	4.75	2.72	2.94	0.52	-0.865	-0.243	1.1	0.0604	9.71	8.2	1.8	-0.659	-5.74	0.224
cg00386405	19	30863275	ZNF536	9745	2	blue	-2.19	17.3	13.2	9.37	-14.2	1.86	-9.11	-1.66	-5.92	-15	2.58	-6.83	-2.82	0.592	-1.79	9.27	0.83	4.71	-2.07	-7.99	-2.58	1.41	-6.45	1.3	2.71	2.61	1.19	-1.15	0.904	2.29	0.144	-0.594	-0.317	-0.968	-2.67	0.261	-0.0732	11.8	5.15	-1.47	-1.76	-5.92	-4.69
cg00388391	1	18459578	IGSF21	84966	5	green	0.354	-5.94	-9.3	1.35	17.7	3.08	10.5	2.66	0.715	9.22	1.75	0.425	12.8	-2.4	1.87	-2.02	-0.386	-5.71	1.45	9.73	1.25	2.3	2.58	1.87	0.227	2.54	-0.107	0.276	0.127	2.18	3	2.1	0.749	0.937	1.1	0.25	0.89	-4.56	1.24	2.9	0.268	3.45	6.15
cg00388660	10	47659088	ANTXRL	195977	2	blue	-2.03	26.4	14.1	15.6	-10.8	3.81	-6.37	0.0261	-7.5	-16.5	3.49	-9.72	1.09	-0.308	-0.795	12.8	0.926	4.31	-1.11	-6.09	-1.7	2.96	-7.39	3.4	3.05	5.17	1.44	-0.449	1.83	3.93	1.74	0.181	0.342	-0.737	-1.85	0.194	0.574	13.6	7.89	-0.497	-1.12	-7.3	-3.9
cg00388673	1	99729460	LPPR4;LPPR4	9890	7	black	8.87	-4.87	-10.2	0.703	15.8	-2.32	18.7	6.14	6.37	7.82	-6.49	0.312	9.6	-3.78	3.54	-3.8	1.88	-1.52	8.66	6.37	9.17	-2.29	4.74	3.18	-2.76	-1.37	3.23	1.24	-1.44	-1.36	3.2	1.91	-0.637	1.4	0.821	-0.241	-0.555	-7.43	0.263	2.08	-0.183	1.78	4.3
cg00393263	1	228336474	GJC2;GUK1;GUK1;GUK1	NA	2	blue	-1.34	22.4	15.4	15.3	-8.67	5.08	-5.56	1.46	-5.54	-11.1	3.92	-6.72	2.47	2.31	-0.127	14.9	1.8	5.04	-0.46	-3.48	-0.626	3.31	-3.85	5.83	3.27	7.09	1.7	1.2	4.65	4.86	1.75	0.516	1.15	-0.198	-1.36	1.32	-0.378	12	6.96	0.606	-0.395	-7.06	-3.48
cg00393283	10	92984646	PCGF5	84333	2	blue	3.04	19	11.4	12.4	-7.78	2.09	-2.49	1.58	-1.91	-10.3	-0.0817	-6.61	1.4	0.358	-1.19	10.2	2.99	7.57	2.54	-5.02	2.03	0.811	-3.68	4.33	3.43	2.82	4.98	0.726	1.99	3.57	2.63	0.0229	1.05	0.647	-1.14	0.162	0.175	9.36	6.86	-0.58	-0.428	-4.97	-2.52
cg00393673	1	165494483	LOC400794	400794	2	blue	0.832	21.1	13.3	12.1	-10.3	2.16	-4.65	-0.428	-3.61	-13	0.952	-7.12	-0.0273	0.662	-0.609	11.2	2.44	7.22	0.189	-5.66	0.159	1.06	-5.49	3.7	3.05	3.53	2.74	0.744	2.31	4.02	1.43	-1.82	0.839	0.0533	-2.02	-0.34	0.418	10.6	6.81	-1.2	-0.782	-5.19	-4.34
cg00394581	16	84512362	KIAA1609	NA	5	green	-2.17	-7.29	-10.5	1.67	21.6	4.69	10.5	3.44	-1.33	9.04	3.12	0.391	14	-2.64	2.99	-1.58	-3.51	-8.56	0.578	12.3	0.541	5.4	2.31	0.697	-0.502	4.17	-2.83	-0.164	1.46	2.31	4.02	5.34	0.202	0.883	1.66	0.0646	0.186	-2.89	0.564	3.67	0.743	1.85	6.77
cg00394718	8	120684921		NA	2	blue	0.476	19.5	13	10.4	-14	0.31	-7.77	-1.39	-4.5	-15.5	0.928	-7.72	-2.65	-0.345	-1.39	8.66	3.09	6.06	-0.481	-9.74	-1.08	-0.395	-6.44	2.71	3.08	0.934	2.7	-1.8	-0.114	1.76	0.331	-1.81	0.347	0.202	-1.81	0.751	0.274	10.2	6.28	-1.51	-1.01	-5.42	-5.66
cg00395894	19	17881640	FCHO1;FCHO1;FCHO1;FCHO1	23149	5	green	1.42	-5.74	-8.33	0.999	17.8	2.38	10.8	3.84	1.83	9.29	1.01	1.21	11.8	-1.47	4.4	-1.82	1.15	-4.71	2.46	10	2.7	1.22	3.7	3.37	0.633	2.72	-1.59	1.21	0.899	1.85	1.99	2.62	0.828	2.64	1.82	0.768	1.08	-5.4	0.612	4.08	2.3	3.96	5.36
cg00395929	15	57181938	LOC145783	145783	8	pink	8.66	2.59	1.29	3.11	4.65	-0.357	8.31	20.6	6.74	3.71	-4.58	2.24	4.99	2.98	1.8	3.2	2.86	5.65	16.5	3.96	12.6	-1.85	10.3	9.14	-3.94	3.36	5.25	5.91	3.6	-4.32	2.67	9.86	1.21	1.93	1.2	2.38	-5.13	-1.81	0.972	0.9	1.44	-0.396	0.718
cg00395990	11	119054921	PDZD3;PDZD3	79849	8	pink	1.45	1.25	0.548	3.07	4.65	2.52	4.08	19.4	0.981	3.12	-1.22	1.38	5.82	2.65	2	3.16	-1.18	0.381	9.06	4.99	8.18	0.531	8.27	4.87	-6.38	6.28	0.0632	4.29	3.5	-4.95	-0.534	11.9	0.351	0.374	1.11	2.64	-6.88	-1.75	-0.307	1.65	0.212	-1.1	0.9
cg00397104	1	3662685	KIAA0495	NA	2	blue	-3.5	22.2	11.5	18.2	-8.09	4.93	-5.77	0.429	-9.78	-15.6	4.8	-11.3	3.39	-1.4	-0.594	12.9	0.226	1.54	-1.89	-4.68	-2.34	3.86	-7.85	3.21	3.02	6.1	0.496	-1.38	2.18	4.05	1.7	1.16	-0.174	-0.927	-2.61	0.634	0.00235	13.9	8.59	-0.278	-1.39	-7.9	-2.86
cg00397274	2	240240189	HDAC4	9759	2	blue	1.27	17.4	9.69	11.6	-9.26	0.803	-4.08	-0.679	-4.14	-14	-0.379	-8.6	-0.198	-1.78	-1.22	8.4	1.15	5.46	0.493	-7.04	0.347	1.2	-6.67	1.42	2.48	1.46	3.54	-2.33	0.292	2.42	2.34	-0.383	-0.711	-0.957	-2.67	-0.616	-0.303	11	6.45	-1.31	-1.92	-5.9	-4.1
cg00397714	2	192815005	TMEFF2	23671	2	blue	2.32	21.4	11.5	12.7	-10.1	0.848	-4.02	-0.35	-3.32	-14.4	0.0893	-8.47	-0.177	-1.03	-1.03	9.68	2.99	7.04	1.22	-7.49	0.525	0.252	-6.11	3.71	3.07	1.7	4.06	-0.875	0.525	2.88	2.22	-1.62	-0.125	-0.19	-2.14	0.633	0.565	10.3	7.01	-1.28	-1.37	-6.24	-4.35
cg00399807	16	11368889	PRM3	58531	1	turquoise	12	0.467	-1.06	-0.0153	3.88	-5.35	9.08	13.3	8.83	3.26	-11.3	2.23	1.95	1.04	1.47	-0.717	4.16	5.81	14.4	1.44	17.1	-6.36	9.25	6.19	-6.09	-0.558	5.48	4.28	0.533	-6.75	-0.865	4.08	0.453	1.95	1.03	1.35	-4.02	-5.81	-0.119	-0.534	0.667	0.633	-0.116
cg00400827	16	29230046		NA	5	green	2.47	-10.7	-13.4	-2.8	19.1	-0.601	13.4	2.91	3.56	10.8	-0.851	2.21	7.56	-3.49	2.16	-5.96	0.0542	-5.84	3.44	8.7	2.25	0.603	3.48	0.454	-0.327	-1.59	0.0567	0.13	-0.178	-0.973	3.42	3.44	-0.472	1.74	1.51	-0.938	0.164	-6.84	-1.3	1.9	1	0.97	4.01
cg00402074	6	46889742	GPR116;GPR116	221395	5	green	3.24	-7.61	-7.93	-1.84	18.5	1.98	11.9	5.23	5.35	13.8	-0.744	5.13	9.82	1.42	3.48	-2.84	0.5	-2.08	4.37	11.4	4.88	1.71	7.85	4.06	-1.13	3.03	0.554	3.81	2.19	1.58	2.94	2.99	2.73	3.73	3.69	0.939	-0.188	-6.77	-1.02	3.23	3.16	5.53	6.08
cg00403579	9	124533992	DAB2IP;DAB2IP	153090	10	purple	2.83	-9.55	-3.75	-7.72	10.2	1.74	6.44	5.15	9.21	19.2	-1.28	12.9	3.28	7.71	3.94	-3.31	1.55	1.6	3.72	11.1	4.79	-0.378	13.6	4.5	-1.99	3.02	-0.931	7.94	3.87	0.578	-0.421	1.32	3.57	3.35	3.61	1.29	-0.696	-9.54	-5.06	4.07	3.88	7.86	4.08
cg00404053	1	178313656	RASAL2;RASAL2	9462	3	brown	-2	13.6	19.1	6.3	-11.7	6.07	-8.38	0.161	-1.63	-6.43	3.91	0.137	-2.44	7.74	-1.88	13.1	0.628	9.03	-1.53	-2	-1.65	3.55	-0.351	3.9	3.3	6.96	2.14	3.87	6.98	5.58	0.948	-0.465	2.3	0.348	-0.503	1.67	0.434	10.1	2.46	-0.614	1.43	-2.52	-2.7
cg00404861	12	131590393	GPR133	283383	5	green	3.72	-8.02	-13.3	-0.0629	20.1	-0.633	14.7	3.04	2.76	8.48	-1.1	-0.586	10.1	-5.61	3.42	-4.95	2.41	-5.97	3.92	7.57	2.94	-1.05	1.91	1.18	1.72	-2.32	0.00646	-1.2	-1.31	-0.424	2.54	2.69	-1.5	1.81	0.405	-0.843	1.37	-7	-0.19	3.13	0.37	2.56	4.72
cg00405078	6	34504890		NA	8	pink	4.03	-1.61	-2.55	2.57	10.6	2.5	9.57	17.3	3.48	7.33	-2.07	2.57	10	2.31	3.29	2.13	1.23	-0.0393	9.95	9.13	9.93	-0.422	9.89	6.65	-4.28	5.85	0.818	4.97	4.53	-2.8	-0.119	8.7	0.53	1.64	1.7	1.35	-4.11	-5.56	-0.91	3.32	0.732	1.71	4.26
cg00405484	8	141544373	EIF2C2;EIF2C2	NA	5	green	0.39	-7.15	-8.72	0.143	20.1	4.17	11.7	3.91	2.15	12.2	2.03	3.44	12.3	0.111	2.26	-1.3	-0.935	-4.95	2.17	13.6	1.98	3.46	5.14	3.23	-0.13	4.38	-0.467	2.89	2.69	2.96	3.6	3.19	1.27	1.94	2.43	0.0872	0.336	-5.02	-0.51	3.16	2.23	3.98	7.54
cg00405554	8	65490897	LOC401463	401463	2	blue	1.78	19.1	12.3	14.8	-6.63	3.38	-2.91	2.06	-3.28	-9.38	1.46	-6.97	3.37	1.19	0.813	12.3	6.24	5.83	1.07	-3.4	1.9	-0.73	-3.12	6.96	4.76	4.57	2.78	2.06	3.6	4.46	-0.637	-1.7	0.829	0.508	-2.07	0.39	1.12	6.83	7.14	0.899	-0.962	-4.73	-3.06
cg00406392	10	13749405	FRMD4A	55691	10	purple	2.67	-14.4	-7.74	-9.7	13.3	0.788	8.27	2.77	9.17	22.9	-0.746	11.9	3.17	4.85	1.99	-5.98	0.876	-0.446	2.83	11.3	2.75	-0.179	10.8	1.86	-0.873	0.276	-0.218	5.08	2.54	0.492	0.934	0.885	2.44	2.84	3.16	0.646	0.505	-10.4	-4.85	2.6	3.77	9.36	5.84
cg00407062	9	130964374	CIZ1;DNM1;DNM1;CIZ1	NA	5	green	-1.12	-1.52	-5.71	6.42	16.1	5.96	9.56	3.9	-2.06	5.54	3.81	-1.91	17.9	-1.92	2.89	2.67	-1.43	-5.34	1.22	11.5	1.21	5.53	1.23	3.4	1.12	6.4	-0.856	1.26	3.29	4.44	4.58	4.17	0.16	0.418	0.386	-1.51	1.05	0.0973	3.08	3.84	-0.351	1.68	6.41
cg00408348	11	122851122	BSX	390259	3	brown	-2.67	11.5	18.5	6.92	-8.47	6.08	-6.38	1.4	-1.72	-4.31	4.39	0.89	-0.755	8.46	-1.14	15.8	1.58	7.75	-1.28	1.16	-0.984	3.46	0.687	5.67	3.43	8.66	0.895	4.96	11.3	5.3	-0.0271	0.443	2.8	0.332	0.684	1.64	-1.13	8.48	2.91	0.377	1.62	-1.97	-1.43
cg00408773	1	47689193	TAL1	6886	2	blue	-3.26	15	17.1	10.8	-7.43	7.33	-5.42	0.756	-3.98	-6.83	6.2	-2.04	1.66	6.39	-0.802	18.4	1.71	5.95	-1.87	1.06	-2.17	4.66	-1.87	6.7	4.35	10.1	0.982	4.47	10.2	6.96	1.12	-0.0211	4.09	1.44	1.18	0.58	0.806	11	6.54	1.09	1.6	-3.08	-1.17
cg00409104	17	8762014	PIK3R6	146850	2	blue	-2.44	21.7	14	15.3	-8.33	6.05	-5.93	-0.111	-6.88	-11.9	4.73	-7.64	2.89	1.68	-0.444	14	1.72	4.05	-2.01	-3.4	-1.86	3.81	-5.88	5.12	4.39	7.07	1.32	1.84	3.91	6.46	1.77	-0.626	1.06	-0.197	-1.62	-0.521	0.938	12	7.5	0.599	-0.664	-4.9	-1.98
cg00409696	2	106646656		NA	5	green	2.1	-14.3	-12.4	-5.64	18.8	-0.0988	12.1	3.75	5.14	15.3	-1.7	5.44	6.55	-0.797	2.88	-6.18	0.601	-5.22	2.87	11.1	3.78	-1.17	6.98	0.288	-1.35	-0.73	-1.51	1.21	1.07	-1.4	-0.227	2.41	0.152	1.91	2.36	-0.433	-0.0025	-10.9	-3.74	3.14	1.53	5.92	6.02
cg00410534	16	67232557	ELMO3;E2F4	NA	10	purple	3.6	-8.87	-2.93	-7.52	9.88	1.89	6.98	4.3	10.5	20	-0.484	13.7	3.14	8.55	2.91	-2.77	2.92	2.99	4	11.1	4.12	-0.453	13.1	5.25	0.392	2.5	0.658	7.93	4.19	1.92	0.577	0.7	4.79	3.83	4.74	0.978	0.329	-8.72	-3.28	3.99	5.01	8.94	4.77
cg00410926	9	35563534	FAM166B;FAM166B	730112	5	green	2.28	-11.3	-8.57	-5.14	17	1.91	10.9	3.95	6.49	18.2	-0.323	7.98	6.95	2.53	2.86	-3.95	-0.316	-2.38	3.37	12.8	3.35	1.67	8.97	2.93	-1.43	2.12	-0.565	4.62	3.03	1.23	2.65	2.37	3.07	3.46	4.2	0.258	-0.717	-8.01	-2.18	3.39	3.8	5.93	7.4
cg00411413	16	83171299	CDH13	1012	2	blue	-1.18	20.6	11.6	14.9	-8.22	4.06	-4.05	-0.61	-6.07	-13.4	3.89	-8.95	1.98	-0.629	-0.301	12.2	1.07	4.91	-0.657	-4.65	-2.27	4.02	-7.28	3.33	4.49	4.87	2.06	-0.531	2.5	5.23	3.72	0.202	1.59	0.906	-0.811	-0.262	0.706	13.5	8.4	0.412	-0.199	-6.46	-2.83
cg00411697	11	116663321	APOA5;APOA5	116519	2	blue	-3.43	15.1	18.2	9.87	-8.18	7.39	-6.31	0.545	-3.74	-6.81	5.59	-1.62	0.916	6.97	-0.11	17.6	1.47	6.89	-2.29	0.805	-1.86	4.51	-1.61	6.46	4.16	10.1	0.22	4.61	9.54	6.8	0.884	-0.337	2.14	-0.485	-0.705	1.34	0.0716	10.9	3.99	1.13	1.06	-2.83	-0.916
cg00414166	11	67777664	ALDH3B1;ALDH3B1;ALDH3B1	221	3	brown	-0.447	12	19.4	2.54	-19	0.659	-11.4	-1.74	-0.114	-8.15	0.978	0.54	-8.41	6.79	-1.41	8.55	4.08	10.2	-1.65	-6.51	-1.11	-1.64	-0.92	2.83	3.51	1.92	1.46	3.12	3.91	1.97	-2.99	-3.28	2.04	0.135	-0.883	1.08	0.346	6.21	1.49	-0.707	0.661	-1.89	-5.41
cg00414835	10	48439452	GDF10	2662	5	green	1.14	-4.91	-7.07	1.6	17.6	4.15	10.7	4.64	2.21	10.5	1.14	2.24	13.8	0.199	2.66	-0.483	-0.171	-3.39	2.94	11.8	3.09	3.3	4.74	4.08	-0.0576	4.94	0.352	3.03	2.07	3.24	3.66	3.16	2.04	2.41	1	-0.579	1.37	-4.22	1.01	3.5	0.943	4.7	7.45
cg00415971	10	86004761	RGR;RGR;RGR	5995	3	brown	-3.34	16.7	21.3	8.48	-13.6	5.28	-10.5	-0.168	-4.33	-9.31	4.48	-2.16	-2.06	6.24	-0.611	14.4	2.68	6.88	-2.87	-3.59	-1.93	2.19	-2.11	4.96	4.12	7.07	0.154	2.71	5.65	4.95	-1.35	-1.21	2.61	0.914	-0.615	2.02	0.136	10.1	4.32	0.872	0.782	-3.26	-3.9
cg00417131	6	89828674	SFRS13B	NA	5	green	1.33	-4.78	-10.1	3.37	21.4	2.83	12.9	4.4	0.363	8.27	0.943	-1.34	16.5	-3.58	3.83	-1.61	0.0335	-6.38	2.92	9.96	2.88	2.24	2.37	2.96	0.18	2.92	-0.759	0.324	-0.235	1.87	3.38	3.43	-0.162	1.24	0.708	-0.0919	0.839	-4.33	1.85	3.5	0.227	2.44	5.37
cg00417147	12	125578545	AACS	65985	5	green	2.51	-6.82	-12	1.39	23	0.941	15.3	5.87	1.72	8.85	-1.11	-0.186	13.2	-4.08	2.84	-3.07	-1.19	-6.12	4.8	9.88	4.39	1.49	3.43	1.82	-2.44	1.75	0.0164	0.0495	-0.206	-0.584	3.44	4.66	-0.954	1.19	0.783	0.0902	-0.532	-5.84	0.114	2.52	-0.0798	2.1	5.93
cg00417151	20	17598356	RRBP1;RRBP1	6238	3	brown	-1.77	15.8	20.8	8.87	-10.9	5.74	-7.32	0.153	-2.34	-7.36	4.27	-1.16	-0.871	7.39	-1.32	15.9	2.83	8.44	-1.57	-1.54	-1.42	2.88	-1.17	6.44	3.96	8.14	2.06	3.84	7.83	6.21	0.265	-1.52	3.8	1.07	0.267	1.46	1.1	9.68	5.02	0.425	1.23	-2.52	-2.66
cg00417823	16	56330268	GNAO1;GNAO1	2775	4	yellow	0.32	18.9	9.89	17.8	-3.6	5.33	-1.09	2.05	-4.68	-8.71	3.54	-8.32	6.26	0.147	0.406	13	3.84	4.42	1.08	-1.22	0.577	2.45	-4.26	8.03	4.65	6.54	2.88	1.96	3.93	6.01	2.73	-0.0999	1.29	-0.0263	-1.48	0.958	1.28	9.09	9.05	1.31	-0.374	-5.23	-1.68
cg00419094	12	106480579	NUAK1	9891	2	blue	0.334	20.4	8.7	14.7	-9.03	0.636	-4.13	-0.12	-6.99	-18	0.928	-12.7	0.787	-4.18	-1.2	8.43	2.56	2.9	0.376	-8.51	-0.476	0.106	-8.94	2.78	3.03	1.2	2.65	-2.55	-1.3	1.43	1.44	-0.23	-1.73	-1.47	-3.32	0.331	-0.328	10.5	7.7	-1.29	-2.55	-7.78	-5.06
cg00420847	19	41388384	CYP2A7;CYP2A7;CYP2A7;CYP2A7	1549	22	darkgreen	-9.73	0.577	0.316	2.84	1.83	8.85	-3.13	-1.28	-6.55	0.134	9.25	-0.418	4.68	1.73	-1.29	3.1	-13.9	-4.37	-4.75	4.62	-7.28	19.1	-1.97	-0.78	-2.46	9.81	-2.68	0.434	2.43	5.78	9.98	4.99	2.33	-0.0563	2.55	0.989	-0.306	8.66	2.37	0.521	1.77	-0.222	5.48
cg00420879	22	42086546	C22orf46;C22orf46	79640	2	blue	-2.78	24.9	13.2	16.3	-9.38	4.6	-6.54	0.448	-8.29	-14.9	4.22	-9.48	2.39	0.0613	-0.194	13	0.662	3.29	-1.54	-5.02	-1.67	3.36	-6.73	3.93	2.77	6.39	0.468	-0.191	2.01	4.27	1.28	0.324	0.169	-1.16	-1.93	0.587	0.219	13.1	7.83	-0.218	-1.29	-6.74	-3.48
cg00421173	4	140603682	MGST2	4258	10	purple	1.06	-9.85	-2.41	-8.87	7.94	2.23	4.19	5.3	8.57	18.1	0.235	15.6	1.51	9.37	2.53	-2.53	0.139	1.54	2.96	11.2	3.49	0.915	14.3	3.38	-1.94	3.53	-1.33	7.23	5.26	0.00949	-0.391	3.09	3.79	3.6	4.84	1.31	-1.8	-7.48	-5.53	3.45	4.63	7.99	4.55
cg00421221	2	121106091	INHBB	3625	10	purple	6.33	-11.7	-7.07	-7.94	14.1	-1.39	11.7	7.06	12	19.5	-4.46	11	3.57	4.12	2.45	-5.05	0.743	1.54	7.69	11	7.48	-1.88	13.6	2.55	-3.51	-0.0747	1.72	5.38	3.07	-2.48	0.967	3.33	0.589	1.03	2.59	-0.439	-2.06	-10.9	-5.86	1.81	1.9	7.24	4.76
cg00422120	2	219848333	FEV	54738	3	brown	-2.71	12.1	19.8	5.8	-10.3	6.34	-7.58	-0.0286	-1.11	-4.73	6.02	1.31	-2.19	9.14	-0.195	13.7	1.89	8.95	-1.72	-0.362	-3.04	4.14	-0.035	4.68	5.83	7.69	0.643	4.87	8.47	6.41	1.1	0.422	4.56	2.24	1.2	1.35	1.12	10.2	3.97	1.38	3.47	0.00857	-1.62
cg00422474	8	67261068		NA	3	brown	-0.831	14.8	18.1	8.6	-10.1	5.5	-6.64	0.65	-1.85	-6.58	3.45	-1.4	-0.605	6.18	-0.702	14	3.44	8.33	-0.974	-1.91	-0.49	1.76	-0.809	4.79	4.87	6.24	1.69	2.96	6.57	5.47	-0.499	-0.744	2.71	1.21	-0.0967	1.08	0.513	8.91	4.19	0.853	0.948	-2.1	-2.76
cg00422488	9	100747767	ANP32B	10541	5	green	2.5	-5.73	-9.36	1.57	18.6	1.69	13.2	3.47	2.21	9	0.34	0.322	12.5	-2.78	3.86	-1.82	1.8	-4.82	3.05	9.88	2.9	0.994	3.08	3	1.54	1.37	-0.781	1.71	0.737	1.78	2.88	2.21	-0.296	2.54	1.28	0.307	1.59	-5.47	0.887	3.29	1.54	3.58	6.66
cg00422995	2	98256494		NA	4	yellow	-4.47	17.1	10.8	17.5	-4.24	9.66	-3.62	0.735	-8.11	-9.3	7.57	-7.69	6.31	1.11	-0.547	15.1	-1.14	2.2	-2.03	-0.000612	-3.35	8.16	-5.82	4.25	4.21	9.75	1.1	0.427	5.44	8.22	5.1	2.22	1.66	-0.216	-0.572	2.38	0.643	14.8	8.37	1.58	-0.08	-5.36	0.523
cg00423035	7	105319486	ATXN7L1;ATXN7L1	222255	5	green	0.749	-10.9	-8.45	-3.77	19	3.35	11	4.13	4.74	16.7	1.48	6.81	8.62	2.11	2.88	-2.64	-0.128	-3.65	2.39	15	2.44	2.38	7.82	2.73	0.0777	3.06	-1.56	4.46	4.22	1.91	2.17	3.3	1.87	2.78	3.19	1.07	-0.0901	-7.38	-2.89	3.7	3.43	5.3	6.88
cg00423597	1	33235531	KIAA1522	57648	5	green	2.4	-12.4	-12.7	-4.88	18.8	-0.463	12.8	3.14	4.79	12.6	-1.2	4.56	5.99	-1.78	2.75	-6.13	-0.448	-4.86	3.6	9.76	2.7	0.403	5.13	0.566	-1.22	-0.958	-0.751	1.23	0.227	-0.996	2.41	3.41	0.971	2.71	2.73	0.447	-0.197	-7.34	-2.05	2.28	2.09	5.03	4.71
cg00423811	7	157359579	PTPRN2;PTPRN2;PTPRN2	5799	8	pink	7.99	1.95	0.534	1.87	3.45	-2.63	7.02	20.1	5.78	2.6	-5.77	1.76	3.09	1.88	1.1	1.6	1.06	4.49	15.9	2.17	12.5	-1.79	9.69	7.55	-6.88	2.56	4.48	4.79	2.12	-7.3	2.38	10.4	0.93	1.55	1.63	2.03	-5.58	-2.01	0.801	-0.587	1.05	-1.09	0.0696
cg00424169	13	31506837	C13orf26;C13orf26	NA	3	brown	2.14	19.7	15.1	12.6	-8.35	2.19	-3.33	2.33	-1.93	-8.78	1.18	-4.85	1.54	3.1	0.985	13.2	6.21	7.73	1.79	-3.77	1.85	-0.697	-1.84	7.45	4.06	4.52	2.71	2.19	4.75	3.29	-0.26	-1.16	1.31	0.652	-1.6	1.28	0.338	7.43	6.88	1	-0.299	-4.81	-4.15
cg00424354	11	100555339		NA	2	blue	3.3	19.6	10.3	13	-7.83	1.02	-2.29	1.01	-2.45	-11.8	-0.108	-8.14	1.4	-0.856	-0.536	9.15	2.94	7.12	2.8	-6.1	1.42	0.656	-5.09	4.49	3.57	2.18	4.85	-0.2	0.654	3.03	3.3	-0.0587	0.0807	-0.159	-2.08	0.926	0.517	9.76	7.51	-0.567	-1	-4.8	-3.2
cg00425217	19	13205470	NFIX	4784	4	yellow	-3.04	14.6	8.77	17.7	-2.33	8.09	-2.03	0.96	-7.62	-7.73	6.07	-8.2	7.93	0.0579	0.253	14.5	0.635	0.634	-1.81	0.987	-1.87	5.49	-5.13	4.5	4.96	8.21	0.631	0.587	6.08	7.25	3.14	1.26	0.129	-1.06	-1.87	-0.227	0.217	10.4	7.37	1.48	-1.77	-6.5	-0.196
cg00425827	5	131346715	ACSL6;ACSL6	23305	5	green	2.87	-8.08	-11.2	-0.451	20.1	1.2	13.1	3.86	3.2	11.9	-0.954	1.82	11.8	-2.45	2.83	-4.11	0.485	-5.12	3.49	9.46	3.72	0.468	4.46	1.58	-0.689	0.387	0.377	-0.128	-0.569	0.69	2.46	2.58	-0.00106	1.21	1.43	0.337	-0.202	-7.04	-0.15	3.39	0.335	3.59	5.9
cg00425843	10	94883021		NA	2	blue	-2.35	24.6	11.8	19.1	-7.93	4.81	-5.08	0.687	-8.82	-15.6	4	-11.3	3.75	-1.32	-0.665	13.2	1.12	2.49	-1.17	-4.76	-1.36	3.41	-7.65	3.92	3.62	6.12	1.3	-0.795	2.02	4.55	1.76	0.757	0.375	-0.602	-1.79	0.766	0.601	12.7	8.94	-0.359	-1.4	-7.22	-3.1
cg00426822	1	39546536	MACF1	23499	5	green	1.69	-8.04	-11.6	-0.437	17.3	1.36	10.7	3.1	1.68	9.74	-0.378	0.524	10.5	-3.59	2.79	-4.78	1.29	-6.25	2.31	7.79	2.47	-0.413	2.69	-0.242	1.07	-0.872	-0.57	-0.916	-1.41	0.218	0.888	2.7	-1.68	0.374	-0.141	-0.811	0.659	-7.24	-1.09	3.39	-1.14	4.68	5.47
cg00428636	8	18589742	PSD3;PSD3	23362	2	blue	2.89	19.1	10.7	11.9	-7.81	1.24	-2.58	1.57	-2.24	-11	0.456	-7.01	1.13	0.119	-0.773	9.7	2.64	7.27	2.79	-5.22	1.3	0.875	-4.15	5.37	2.47	3.25	4.43	0.945	1.51	2.73	2.88	-0.111	0.342	-0.917	-0.733	0.952	-0.0322	9.73	6.69	-1.38	-0.668	-4.7	-3.73
cg00428638	19	7224713	INSR;INSR	3643	3	brown	-1.43	19.3	23	9.41	-13.2	4.66	-8.76	0.374	-2.9	-9.14	4.12	-1.91	-1.5	6.99	-0.264	14.8	2.88	8.98	-1.16	-3.89	-1.53	2.47	-1.87	5.52	4.2	7.04	1.36	2.53	5.7	5.09	0.0933	-0.803	2.78	0.602	-0.35	2.11	0.668	11.2	4.86	0.652	1.08	-3.62	-4.08
cg00429268	20	48097073	KCNB1	3745	5	green	0.813	-9.79	-12.4	-1.01	25.8	2.67	13.8	4.49	2.36	12.8	0.618	2.53	12	-1.98	3.4	-3.91	-1.74	-6.4	3.02	12.7	2.73	2.87	4.81	1.21	-1.2	2.28	-1.5	1.6	1	0.961	3.56	4.47	0.355	1.87	2.23	-0.744	0.00704	-6.31	-0.836	3.61	1.4	4.17	7.55
cg00429618	9	99962350	ZNF322B	NA	31	paleturquoise	-2.89	3.45	1.96	4.87	2.07	6.51	1.18	-1.56	-1.93	-0.238	7.97	-1.15	4.77	0.897	0.438	4.83	-4.55	0.653	-0.545	3.45	-5.74	14.7	-2.66	3.27	5.24	5.72	0.88	1.37	2.94	8.22	17.8	4.84	3.22	3.91	1.9	0.048	2.65	11.7	5.19	2.19	4.05	0.895	4.9
cg00430036	9	99145401	SLC35D2	11046	3	brown	-2.74	14	22.5	6.44	-13	5.33	-8.91	0.0116	-1.79	-6.93	4.25	0.282	-3.23	8.41	-0.438	14.3	1.72	9.04	-2.03	-1.68	-1.78	2.87	-0.345	4.48	3.45	7.37	0.351	4.26	8.16	5.12	-0.506	-0.794	3.17	0.981	0.164	1.68	-0.00697	9.53	3.15	1.03	1.7	-2.45	-2.61
cg00430287	6	116382876	FRK	2444	2	blue	-3.22	21.1	14.8	13.1	-10.7	4.68	-7.05	-0.282	-6.84	-13.3	4.8	-7.1	0.763	1.76	-1.35	13.7	0.405	4.57	-1.91	-4.2	-2.64	3.78	-5.8	4.07	3.13	6.81	1.1	0.763	3.75	4.68	1.61	-0.226	0.891	-0.617	-1.7	1.12	1.21	13	7.07	-0.748	-0.338	-5.03	-2.81
cg00430484	22	38484679	BAIAP2L2	80115	5	green	4.85	-6.15	-6.74	-0.636	17.2	1.08	14	7.55	5.98	12.1	-2.16	4.34	9.67	1.17	2.83	-0.911	2.74	-1.07	6.42	11.7	6.98	-0.662	8.35	6.97	-1.95	2.9	1.52	4.67	3.61	0.111	1.73	2.68	1.71	3.19	2.15	1.07	-0.9	-7.71	-0.781	1.94	2.36	3.95	4.05
cg00433866	6	29623646	MOG;MOG;MOG;MOG;MOG;MOG;MOG;MOG;MOG;MOG;MOG	4340	2	blue	-1.3	21.5	13.2	13.3	-10.5	3.28	-5.97	-0.237	-5.87	-14.4	2.57	-8.13	0.439	0.137	-0.569	12	0.377	5.01	-0.741	-5.55	-1.23	2.82	-6.16	3.27	2.5	4.7	1.62	-0.148	1.87	3.78	2.27	-0.312	0.573	-0.686	-1.81	0.0768	0.0941	12.3	7	-0.523	-0.903	-6.45	-2.72
cg00435173	17	40284046	RAB5C;RAB5C	5878	2	blue	1.08	18.7	12.3	13.1	-6.3	4.5	-3.06	1.7	-2.66	-7.57	2.82	-5.12	3.64	2.68	0.654	11.2	2.61	6.9	1.33	-2.92	0.64	2.77	-2.38	5.95	4.09	5.93	2.99	2.7	2.59	5.55	2.98	0.275	1.12	0.139	-1.29	1.41	0.557	9.56	6.23	0.924	-0.397	-2.93	-2.44
cg00436254	2	127862614	BIN1;BIN1;BIN1;BIN1;BIN1;BIN1;BIN1;BIN1;BIN1;BIN1	274	2	blue	-2.05	23.2	13.3	16.3	-9.19	4.75	-5.98	0.353	-7.52	-14	4.12	-9.33	2.59	0.118	-1.16	13.2	1.28	3.48	-1.26	-4.79	-1.73	3.11	-6.63	4.23	3.47	6.09	2.11	-0.207	2.67	4.66	1.66	-0.0794	0.875	-0.551	-1.36	0.857	0.498	12.1	8.44	-0.576	-1.31	-6.33	-3.69
cg00438026	6	31513267	ATP6V1G2;NFKBIL1;NFKBIL1;ATP6V1G2	NA	13	salmon	-1.54	2.1	-2.47	9.43	11.4	7.21	6.67	6.18	-3.22	2.98	4.37	-3.62	19	-1.32	3.98	4.74	-1.41	-4.22	2.01	8.84	1.9	5.85	1.26	4.71	1.03	8.83	-1.88	1.11	2.12	4.35	4.33	5.94	0.0619	0.931	-0.362	0.924	0.744	1.29	4.03	4.21	0.168	-0.368	4.89
cg00439261	16	75273413	BCAR1;BCAR1;BCAR1;BCAR1;BCAR1;BCAR1;BCAR1;BCAR1;BCAR1	9564	4	yellow	0.461	18.4	11.2	15.6	-4.75	3.53	-0.932	2.2	-3.96	-9.85	2.94	-6.9	4.17	0.92	0.371	14.9	3.09	4.89	1.47	-0.999	0.589	2.75	-3.92	7.84	3.6	6.93	2.54	2.31	5.84	4.26	2.93	0.664	1.99	0.843	-0.326	0.376	0.682	10.6	8.54	0.75	0.345	-7.01	-1.64
cg00445142	3	120115868	FSTL1;MIR198	NA	2	blue	4.11	21.3	12.5	11.7	-10.1	0.126	-3.22	1.11	-1.52	-12.4	-1.57	-7.08	-0.426	0.105	-0.862	9.82	4.84	8.66	2.61	-7.02	2.71	-1.76	-4	4.98	2.69	1.53	5.38	0.315	1.2	1.95	0.625	-1.88	0.487	-0.218	-1.89	1.13	-0.00536	8.1	6.95	-1.29	-1.19	-5.81	-5.02
cg00446900	10	129717806	PTPRE	5791	2	blue	-3.67	21.2	15.4	14.7	-9.77	6.21	-6.78	-0.131	-7.51	-12.4	5.36	-7.37	2.03	1.73	0.0215	15.9	1.08	3.6	-2.62	-3.02	-2.52	4.41	-5.56	4.14	4.53	7.56	0.0691	1.14	4.89	5.85	1.49	0.135	0.671	-0.401	-1.8	0.907	1.08	13.2	6.79	0.907	-0.681	-6.81	-2.36
cg00448889	15	60714492	NARG2;NARG2	NA	8	pink	6.45	2.07	1.43	3.3	6.2	1.64	8.55	21.9	6.17	5.21	-2.07	3.2	6.46	4.48	1.87	4.23	1.6	4.97	14.9	6.77	10.5	0.679	11.1	9.58	-3.27	6.18	4.25	7.67	5.39	-2.74	3.79	11.5	2.75	3.37	2.56	2.95	-4.35	-1.32	1.41	1.5	3.04	0.617	2.38
cg00449021	1	234658467		NA	2	blue	-2.19	24.7	14.4	15.5	-9.85	4.51	-6.12	1.3	-7.27	-14.2	3.07	-8.61	1.77	0.65	-0.757	13.7	1.17	4.07	-0.797	-4.82	-0.483	3	-5.69	4.15	2.73	6.3	1.33	0.929	3	3.85	1.16	0.803	0.118	-1.03	-2.43	0.611	-0.498	12.4	7.02	0.0562	-1.76	-6.68	-3.88
cg00450784	12	106979062	RFX4	5992	10	purple	1.3	-17.1	-8.29	-12.3	9.95	-1.08	5.65	0.768	7.78	17.6	-1.2	11.5	-0.072	3.53	1.63	-7.58	-0.494	-1.93	1.06	8.54	1.32	-0.243	8.93	-1.06	-0.921	-1.78	-1.84	3.35	1.88	-1.19	0.169	1.06	2.06	2.7	3.55	-1.13	-0.229	-9.37	-5.49	2.02	2.93	7.86	5.92
cg00450990	2	23751324	KLHL29	114818	5	green	1.15	-8.18	-11.7	0.015	22.5	2.72	13	3.88	1.89	11.2	0.298	1.47	12.3	-2.49	3.51	-3.58	-0.522	-6.23	2.72	11.1	2.98	2.02	3.94	1.6	0.12	1.78	-1.14	1.34	0.371	1.74	2.93	3.37	-0.223	1.34	1.25	0.136	0.497	-6.25	-0.855	3.63	0.665	3.81	6.44
cg00452133	1	7308117	CAMTA1	23261	2	blue	-2.42	24.9	14.1	15.4	-10.5	4.66	-6.67	-0.319	-7.64	-15.5	4.24	-9.14	1.39	0.137	-0.567	13	0.929	3.91	-1.78	-5.49	-2.19	3.48	-7.08	3.59	3.47	5.74	1.1	0.0522	2.38	4.76	1.87	-0.168	0.76	-0.0108	-1.82	0.879	0.0487	13.4	7.91	-0.0933	-0.786	-6.89	-3.24
cg00452755	1	28864993	SNHG3-RCC1;RCC1;RCC1;RCC1;SNHG3-RCC1;SNHG3-RCC1	NA	2	blue	-3.33	24.8	13.9	17.1	-9.17	5.61	-6.37	2.08	-8.65	-14.7	4.65	-9.36	2.84	0.386	-0.671	14.4	0.286	2.99	-0.891	-4.21	-1.32	3.96	-6.03	4.23	2.38	7.62	0.828	0.224	2.99	3.83	1.34	1.99	0.709	-0.758	-1.42	0.998	0.271	13.4	8.08	-0.194	-1.14	-6.81	-3.24
cg00453938	20	39320532		NA	4	yellow	-0.796	16.4	8.73	18.3	-3.03	5.09	-0.762	1.26	-6.05	-9.42	3.85	-9.17	6.66	-0.905	0.46	13.7	2.67	2.13	-0.0969	-0.682	-0.387	3.12	-5.41	5.7	4.82	6.41	2	0.298	4.9	5.79	2.52	0.355	-0.115	-0.754	-2.04	0.0627	2.35	9.68	8.27	0.785	-1.42	-5.33	-0.748
cg00454864	7	150819434	AGAP3;AGAP3	116988	5	green	2.08	-4	-5.67	2.31	17.9	3.67	12.7	10.8	2.74	9.9	0.715	2.66	13.1	1.32	1.74	1.42	-1.51	-2.63	6.8	13.7	5.51	3.82	7.7	6.4	-2.98	6.91	1.29	4.74	4.76	0.0259	4.43	8.08	1.58	1.56	2.77	1.56	-1.76	-3.4	0.591	2.65	2.05	2.83	7.2
cg00455327	18	20714217	CABLES1	91768	5	green	1.45	-11.2	-11.8	-3.07	20.2	1.84	12.3	3.51	3.75	13.2	-0.802	3.71	9.24	-1.21	1.88	-4.91	-1.67	-5.37	2.51	11.4	3.14	1.82	5.43	0.45	-2.14	1.38	-0.317	1.24	0.316	0.519	2.53	2.97	0.444	1.54	2.32	-0.509	0.0579	-7.56	-1.76	2.55	1.17	5.25	6.8
cg00455386	7	140104086	RAB19	401409	3	brown	0.35	12.2	20.2	4.12	-10.6	3.5	-6.4	2.09	1.66	-3.81	1.97	2.8	-3.45	10.8	-0.61	12.2	2.59	12.5	1.12	-0.818	0.983	1.79	2.84	7.59	2.29	7.39	2.71	7.48	8.77	4.01	0.487	-0.653	4.04	0.785	0.902	1.72	-0.118	6.93	2.33	0.857	2.67	0.641	-0.432
cg00455883	3	73046007	PPP4R2	151987	17	grey60	11.3	2.36	2.4	1.43	1.07	-2.97	6.17	5.88	7.96	2.32	-6.38	1.64	1.12	1.96	3.02	2.27	17.5	6.99	7.68	0.5	9.87	-13.3	5.59	8.42	2.33	-2.49	4.35	4.25	2.43	-1.42	-6.68	-4.1	0.83	2.35	-0.00405	0.716	0.225	-8.31	0.258	1.94	0.26	0.888	-3.05
cg00456162	13	96706773	UGGT2	55757	8	pink	3.79	1.16	0.646	2.51	5.21	1.25	5.9	18.1	3.55	4.12	-2.19	2.29	5.56	3.08	1.87	2.99	-0.852	2.65	11.1	5.26	8.98	1.45	9.08	6.11	-5.32	5.79	2.09	4.64	3.88	-4.23	2.58	12.3	1.54	2.1	1.7	3.07	-5.72	-0.698	0.379	1.98	1.55	0.193	2.09
cg00456299	1	22677736		NA	4	yellow	-1.85	17.1	9.83	16.6	-4.22	6.37	-2.14	-0.323	-6.35	-9.46	5.83	-8.38	5.54	-0.0224	0.429	13.6	1.6	2.81	-1.31	-1.13	-2.57	5.11	-6.04	5.31	6.21	6.66	1.43	0.755	4.53	7.83	4.32	0.034	0.722	0.388	-1.76	-0.586	1.88	11.7	7.51	1.31	-0.453	-4.73	-1.35
cg00457087	1	162602295	DDR2;DDR2;DDR2;DDR2	4921	3	brown	-0.144	15	20.5	6.26	-12.1	4.38	-6.88	0.589	0.158	-6.39	3.03	0.589	-2.88	8.12	-1.53	13.2	2.51	11.3	0.111	-2.51	-0.599	2.41	0.15	5.99	3.31	6.29	3.12	4.29	6.45	5.15	1.34	-1.05	3.89	1.72	0.756	2.19	0.352	9.45	4.14	-0.176	2.6	-1.7	-2.91
cg00458395	19	13104674		NA	8	pink	4.85	1.94	1.93	2.36	4.32	0.783	5.92	18.5	4.85	4.1	-2.85	3.19	4.63	4.84	1.12	3.68	-0.582	4.34	12.4	5.46	10.3	1.1	10.5	8.3	-6.03	6.63	3.42	7.33	4.5	-3.92	2.72	10.7	2.66	1.41	2.57	2.16	-5.08	-0.728	1.04	1.09	2.12	0.465	2.79
cg00458754	10	88427813	LDB3;LDB3;LDB3;LDB3;LDB3;LDB3	11155	2	blue	-2.1	24.2	14.6	14.2	-11.4	3.9	-6.78	-0.606	-6.98	-15.4	3.66	-8.53	0.676	0.529	-0.459	13.1	2.03	4.62	-1.7	-5.59	-1.84	2.03	-6.83	3.92	3.71	5.28	1.11	0.136	2.39	4.46	0.523	-1.23	0.926	-0.403	-1.55	0.743	1.11	11.9	7.72	-0.383	-0.858	-5.82	-4.09
cg00459447	7	108210006	THAP5;DNAJB9;THAP5	NA	17	grey60	14.4	-0.358	-0.156	-1.95	0.842	-8.43	6.73	5.33	10.2	2.84	-9.88	2.3	-1.57	0.331	2.37	-1.71	15.9	6.35	9.24	-1.86	10.8	-17.2	6.14	6.75	0.189	-6.2	5	3	-0.391	-5.49	-6.81	-4.48	-0.436	1.63	-0.381	-0.0961	-0.27	-11.5	-1.5	0.149	0.00338	1.38	-4.38
cg00459845	16	33070632		NA	51	thistle1	2.56	1.45	0.853	2.17	0.498	-0.117	1.86	1.43	1.3	0.00766	-1.51	-0.933	1.74	-0.483	3.89	1.23	3.96	1.57	1.81	-0.0383	2.36	-1.85	0.616	1.69	2.5	-0.841	-0.445	0.512	0.361	0.51	-0.436	-0.184	1.61	2.84	-0.714	-0.488	-2.64	-0.454	2.27	4.93	-1.37	-0.985	2.05
cg00459913	8	11469136		NA	8	pink	10.6	3.14	1.12	3.35	4.18	-2.04	8.88	18	7.31	3	-6.32	1.57	5.02	2.3	2.09	2.54	4.12	6.15	16.8	2.74	14.3	-3.57	9.61	9.72	-4.3	2.28	5.91	5.85	2.64	-4.68	1.76	6.88	0.514	1.7	0.193	1.02	-5.06	-3.15	0.596	0.647	0.0705	-0.179	-0.31
cg00460322	13	112980649		NA	5	green	2.58	-12.3	-8.59	-5.9	18.8	1.76	12.1	4.92	7.49	19.9	-0.0892	9.11	6.67	3.17	3.64	-3.24	1.63	-2.02	3.91	15.2	3.75	0.314	10.1	4.41	-0.00796	2.25	-0.96	5.77	4.67	0.893	1.39	2.47	1.95	3.2	3.25	0.672	0.63	-9.94	-4.58	4.08	3.7	7.09	5.97
cg00460776	12	120731287		NA	3	brown	-4.19	16.1	17.6	8.78	-12	6.68	-10.2	-0.311	-5.23	-8.9	5.23	-2.84	-0.788	5.38	0.229	12.8	0.163	5.64	-3.01	-3.37	-2.73	4.26	-2.84	3.19	3.52	7.56	-0.816	2.66	4.38	5.61	0.49	-0.0291	1.82	-0.0916	-1.34	1.28	0.412	11.5	3.99	1.58	0.165	-3.36	-2.39
cg00460983	10	91133941		NA	3	brown	-0.944	17.5	19.8	7.53	-14.7	3.91	-8.58	-0.826	-2.17	-9.84	2.91	-2.41	-3.33	5.23	-1.86	12.5	2.37	9.34	-1.23	-4.74	-1.55	2.07	-2.65	4.14	3.88	5.1	2.84	3.07	4.69	5.06	0.799	-1.77	2.56	0.83	-0.513	0.701	0.442	10.5	4.66	-1.06	0.371	-3.12	-3.68
cg00461578	4	146819333	ZNF827	152485	2	blue	1.45	24	12.8	13.9	-9.88	1.61	-4.3	0.526	-4.25	-14.4	0.899	-8.64	0.578	-0.313	-0.826	11.1	2.55	6.5	1.21	-6.54	0.416	0.772	-5.79	4.55	2.74	3.29	3.55	0.108	1.39	2.91	1.87	-0.782	-0.474	-1.09	-2.68	0.459	-0.151	11	6.84	-1.12	-1.45	-6.09	-4.35
cg00461650	16	14003724		NA	2	blue	-2.85	23	16	15.2	-9.65	6.14	-6.6	-0.395	-6.64	-12.4	4.95	-7.08	2.03	2.06	-0.917	15.4	1.64	4.95	-2.29	-3.49	-2.24	3.88	-5.68	4.24	4.65	7.07	1.41	0.412	4.48	6.27	1.46	-0.351	2.2	0.446	-0.903	1.49	1.15	13.6	8.26	0.104	0.188	-5.98	-3.21
cg00461753	12	116990469		NA	7	black	6.29	-8.68	-14.2	-1.78	18.7	-3.19	17.4	5.2	5.2	8.89	-4.27	0.464	8	-5.37	2.08	-6.64	1.01	-4.35	7.1	6.12	5.81	-1.95	3.78	1.11	-2.63	-3.27	2.3	-0.749	-2.53	-3.41	3.15	3.58	-0.561	1.72	1.45	-0.69	-0.626	-7.87	0.111	0.888	0.395	2.39	3.43
cg00461991	2	239963209		NA	21	darkred	11.6	1.52	0.282	1.19	3.32	-3.54	8.54	11.4	8.37	2.91	-11.1	2.45	2.67	2.03	2.52	0.838	2.88	6.5	12.7	2.27	17.2	-4.67	8.87	5.51	-6.25	0.559	4.98	4.54	1.98	-4.39	-0.17	3.49	1.26	1.86	2.07	1.23	-4.97	-4.02	0.313	0.364	1.2	-0.0566	0.343
cg00462700	10	134021845	STK32C	282974	2	blue	-3.19	18.9	13.5	15.7	-6.45	6.98	-4.75	0.739	-6.53	-9.7	6.65	-6.39	4.08	2.3	-0.0236	15.7	1.03	3.85	-1.27	-1.4	-2.8	5.74	-4.94	5.55	6.01	8.3	1.12	1.15	5.68	7.06	3.66	1.69	1.65	0.488	-0.746	1.28	1.21	13.7	8.1	1.37	0.496	-5.37	-1.12
cg00462951	12	5539736		NA	2	blue	-1.26	20.3	15.1	13.5	-8.86	5.91	-5.27	0.546	-4.43	-10.2	4.38	-5.87	1.87	2.57	-0.0815	14.2	2.6	6.05	-0.82	-3.06	-1.35	3.28	-4.07	5.55	4.91	6.59	1.72	1.7	4.49	6.26	2.17	-0.369	1.72	0.475	-0.654	1.49	0.58	11	7.09	1.17	0.211	-4.59	-2.57
cg00463202	13	114107710	ADPRHL1	113622	5	green	3.43	-6.25	-10.6	1.76	23.7	1.37	16.3	4.82	2.85	9.22	-0.206	0.213	13.4	-3.12	3.68	-2.01	1.75	-4.8	4.58	10.9	3.86	0.703	3.4	3.96	0.502	1.46	0.14	1.02	1.23	1.14	3.49	3.17	0.296	2.49	1.93	-0.318	0.934	-5.93	1	3.19	1.88	2.82	5.35
cg00463491	3	177914725		NA	7	black	4.18	-8.27	-8.8	-1.95	17.6	1.1	14.7	4.87	6.28	12.1	-1.64	4.25	8.39	0.0123	2.58	-2.77	0.651	-1.88	5.18	11.3	4.74	1.03	6.37	2.79	-0.818	1.26	1.17	2.79	2.7	0.823	3.55	3.05	0.439	1.71	2.23	0.0198	1.24	-6.55	-1.52	3.05	1.24	4.07	5.68
cg00463577	6	74161911	C6orf150;C6orf150	NA	3	brown	-2.33	14.8	22.1	7.5	-12.1	5.67	-8.44	-0.0266	-1.97	-6.68	4.65	-0.32	-2.24	7.9	-0.616	15	2.91	8.63	-1.99	-1.64	-1.9	2.73	-0.626	5.77	4.67	7.35	0.765	4.15	7.79	5.91	0.0432	-1.18	4.38	1.77	0.989	1.9	1.29	9.13	4.43	0.759	2.88	-3.37	-2.65
cg00463859	1	23750101	TCEA3	6920	10	purple	2.37	-11.3	-3.36	-9.88	8.48	1.23	6.12	3.62	10.4	19.4	-0.407	16	0.872	8.62	2.08	-2.93	0.127	2.08	3.21	11.4	3.01	0.745	13.1	2.8	-1.74	2.17	-0.493	7.31	5.5	0.451	0.75	1.77	3.84	3.38	4.45	0.348	-1.32	-7.7	-5.5	2.53	4.1	6.89	4.16
cg00465319	3	123339568	MYLK;MYLK;MYLK;MYLK;MYLK;MYLK	4638	4	yellow	-2.18	23.2	12.3	18.6	-7.61	5.28	-4.13	0.4	-7.92	-14.4	3.85	-10.5	3.58	-1.12	0.445	14.1	0.801	3	-1.02	-3.89	-1.42	4.07	-7.38	3.4	4.06	5.66	0.919	-0.819	3.25	5.04	3.01	1.04	-0.493	-0.775	-3.12	0.179	-0.37	13.8	7.67	1.22	-1.67	-7.54	-2.29
cg00465927	1	26190114	PAQR7	164091	5	green	1.33	-5.92	-11.3	1.42	17.3	0.281	12.2	3.74	0.685	5.99	0.808	-1.47	10.4	-5.08	2.05	-3.22	-1.13	-6.59	3.66	7.37	1.42	2.22	0.891	1.05	-0.609	0.246	-0.177	-1.03	-1.08	-0.721	4.62	4.98	-0.422	1.68	0.88	-0.827	-0.111	-2.81	1.71	1.85	0.314	0.15	4.94
cg00466136	11	131561778	NTM	50863	5	green	0.555	-11.8	-6.68	-6.78	13.9	3.11	8.89	2.02	6.57	18.1	1.43	10.6	4.86	4.65	2.03	-2.58	-0.655	-1.66	1.39	14.7	1.17	3.05	8.74	2.47	0.573	3.04	-1.08	5.85	5.05	2.87	2.55	1.93	5.48	5.52	6.2	0.134	0.795	-6.05	-1.89	2.86	6.11	8.39	6.64
cg00466249	17	79269884	SLC38A10;SLC38A10	124565	5	green	1.43	-5.21	-10.3	2.67	18.5	1.46	12.4	3.78	0.161	7.13	0.106	-1.73	13.9	-4.34	2.72	-2.21	-0.234	-6.58	2.63	8.76	2.81	1.68	1.67	1.44	-0.208	1.85	-0.413	-0.399	-0.518	0.817	2.74	3.17	0.0104	1.16	1.19	-0.361	1.03	-4.58	1.76	2.6	0.16	1.9	6.28
cg00466425	6	30856491	DDR1;DDR1;DDR1;DDR1	780	2	blue	-0.73	23.9	19.3	12.3	-11.1	4.72	-6.38	0.773	-3.6	-10.6	3.94	-4.49	0.251	4.36	-0.901	15.5	3.46	8.08	-0.193	-3.68	-0.983	2.26	-3.34	7.06	4.45	7.03	2.69	3.08	5.19	5.56	1.15	-1.06	2.96	1.02	0.0415	1.41	0.831	10.9	6.94	0.214	0.968	-4.12	-4.16
cg00466436	20	123163	DEFB126	81623	2	blue	-2.16	22.3	13.9	17	-7.78	6.02	-4.78	0.628	-6.88	-12.4	4.31	-8.11	3.41	1.04	-0.256	15.2	0.838	4.06	-1.35	-3.04	-1.39	4.35	-5.8	4.26	3.37	7.25	1.52	0.0421	4.57	5.55	2.37	0.55	1.82	0.455	-0.872	1.46	0.298	13.9	8.9	0.744	-0.288	-6.8	-2.84
cg00467854	X	25040358		NA	5	green	4.03	-12.7	-7.74	-7.66	14.1	-0.455	10.6	4.16	9.46	18	-2.68	9.96	3.82	3.46	1.11	-4.76	0.00566	-0.214	4.69	11.6	4.8	-0.0085	10.4	1.85	-2.04	0.297	2.09	4.9	3.48	-0.576	2.05	2.42	1.8	2.32	3.11	0.28	-1.5	-9.01	-4.47	1.43	2.93	6.52	6.98
cg00468670	3	69371195	FRMD4B	23150	2	blue	-1.89	24.1	12.8	16.2	-9.83	3.76	-5.9	0.592	-7.66	-16.4	2.85	-10.3	1.67	-1.04	-0.819	12.3	0.122	3.63	-0.67	-5.85	-0.99	2.97	-7.24	2.39	2.44	4.89	1.31	-1.24	1.51	3.4	1.74	0.983	-0.381	-1.35	-2.42	0.389	-0.207	13.2	7.55	-0.793	-1.93	-7.24	-3.46
cg00470044	2	28456184	BRE;BRE;BRE;BRE;BRE	9577	3	brown	0.939	19.2	17.5	9.55	-11.3	3.7	-6.14	1.32	-1.28	-8.7	2.55	-2.81	-0.978	4.92	-0.371	12.3	2.47	10	1.34	-4.47	-0.0961	2.16	-1.63	5.9	3.26	5.27	3.24	2.47	4.11	4.44	2.21	-0.215	2.09	0.309	-0.764	1.44	0.516	10.7	5.04	0.119	0.39	-4.08	-3.99
cg00472029	13	100619842	ZIC5	85416	10	purple	3.13	-11.8	-4.82	-9.12	9.64	0.518	7.16	3	10	17.8	-2.13	12.8	1.44	5.9	2.35	-3.97	0.537	1.32	3.01	10.5	3.95	-0.0432	11.5	1.49	-1.32	0.531	-0.214	5.5	4.38	0.265	0.649	1.38	2.77	3.55	4.46	1.05	-1.16	-8.36	-5.54	2.59	4.45	7.44	4.42
cg00472879	10	97181896	SORBS1;SORBS1;SORBS1;SORBS1;SORBS1;SORBS1;SORBS1	10580	4	yellow	-5.21	20.2	10.7	19.8	-6.6	6.89	-5.96	-0.312	-11.3	-14.3	6.47	-11.3	5.08	-1.18	-0.252	14.2	0.00745	0.1	-3.54	-3	-3.37	5.12	-8.29	3.54	3.73	8.03	-0.653	-1.39	3.25	5.81	1.45	0.449	-0.2	-1.61	-2.29	0.583	1.05	13.1	8.5	0.519	-2.03	-7.88	-2.3
cg00473531	17	42843798	ADAM11	4185	4	yellow	-2.8	12.9	5.45	17.2	-1.12	5.46	-0.75	0.638	-8.01	-8.97	4.58	-10.2	8.22	-2.53	-0.548	10.7	-1.09	-0.863	-1.27	-0.0298	-1.5	5.37	-6.54	3.07	2.44	7.01	1.15	-1.62	2.6	5.21	3.72	1.56	-1.05	-1.87	-2.12	-0.606	0.565	10.1	7.8	0.159	-2.44	-5.18	-0.179
cg00473916	2	183878531	NCKAP1;NCKAP1	10787	2	blue	-2.09	19.9	11.5	14.8	-7.06	5.09	-5.5	0.537	-7.04	-10.7	4.3	-7.92	3.8	0.995	0.639	12	2.71	3.03	-1.67	-3.46	-1.13	2.09	-5.34	5.67	3.8	6.65	0.549	1.3	2.23	5.21	0.0485	-1.1	-0.452	-1.91	-2.93	0.0897	0.709	9.49	6.1	0.766	-1.95	-5.2	-4.26
cg00474328	6	50811836	TFAP2B	7021	4	yellow	-0.642	12.6	4.86	17.4	-0.558	4.12	0.768	1.83	-6.41	-8.51	3.43	-10.9	8.06	-3.29	0.523	10.1	1.07	-0.0529	0.69	-0.5	-0.318	3.72	-5.78	4.61	3.5	5.32	1.55	-0.659	2.68	4.35	3.86	1.91	-0.845	-0.883	-2.75	0.465	1.61	8.76	8.64	0.406	-1.96	-7.17	0.465
cg00475787	3	180641553	FXR1;FXR1;FXR1	8087	2	blue	4.01	19.6	11.9	10.6	-9.67	-0.103	-2.94	1.11	-1.03	-11.6	-1.3	-6.29	-0.744	0.388	-0.72	9.29	3.5	8.85	3	-6.66	2.35	-0.771	-3.93	4.73	1.91	1.77	4.86	0.646	0.713	1.95	1.84	-1.14	0.268	-0.35	-2.2	0.366	0.0897	8.58	6.13	-1.31	-1.16	-4.29	-4.67
cg00477287	19	19414441	SF4	NA	5	green	3.1	-6.48	-10.9	1.41	23.5	1.59	15.4	5.03	2.55	9.86	-0.261	0.576	13.6	-3.15	3.58	-2.27	1.75	-5.17	4.34	10.7	4.01	0.409	3.84	4.08	0.0385	1.68	0.116	1.31	0.523	0.866	2.63	2.85	0.228	2.05	1.45	0.182	0.644	-6.42	0.56	3.61	1	2.51	4.66
cg00477673	3	167097564	ZBBX	79740	5	green	3.49	-6.88	-11	0.375	19.6	-0.371	15.3	4.04	3.2	8.83	-1.67	0.582	10.7	-3.48	3.11	-3.1	0.0663	-4.59	4.53	9.26	3.86	0.918	3.09	2.19	-1.13	0.448	0.371	0.638	0.391	-0.336	3.92	3.02	-0.133	1.84	1.02	-0.313	0.704	-5.57	0.612	2.83	1.31	3.28	6.44
cg00478851	11	7534329	PPFIBP2	8495	3	brown	-1.43	14.6	25.5	5.1	-15	4.17	-9.94	0.0848	-0.511	-6.62	2.95	1.34	-4.68	9.57	-1.34	13.1	2.69	11.1	-1.35	-2.94	-0.818	1.54	0.572	5	3.43	6.42	1.62	5.17	7.14	4.54	-1.15	-1.56	3.64	1.39	0.291	1.49	0.477	8.63	2.74	-0.463	2.1	-1.37	-3.55
cg00479718	7	691761	PRKAR1B;PRKAR1B;PRKAR1B;PRKAR1B;PRKAR1B;PRKAR1B	5575	7	black	3.68	-7.12	-12.2	0.496	22.2	0.602	16.8	4.07	3.57	9.25	-0.614	0.358	11.7	-3.84	1.73	-3.59	-0.528	-4.76	5.07	9.69	3.08	1.73	2.81	2.21	-0.955	0.654	1.66	0.98	-0.125	0.511	5.43	3.23	-0.46	1.19	1.15	-0.804	1.28	-5.52	0.342	1.96	0.0468	3.25	6.68
cg00479912	16	79472241		NA	4	yellow	-1.01	17.5	11.5	17	-3.96	6.07	-1.54	2.13	-5.18	-8.64	4.3	-6.6	5.84	1.58	1.67	16.5	3.4	3.45	0.179	0.217	-0.189	3.03	-3.96	7.17	4.9	7.87	0.707	1.59	6.61	5.82	1.83	0.847	0.641	-0.172	-1.32	0.607	0.86	9.71	7.44	2.31	-0.205	-5.14	-0.0439
cg00480115	19	35606877	FXYD3;FXYD3;FXYD3;FXYD3;FXYD3;FXYD3;FXYD3;FXYD3	5349	2	blue	-0.151	19.9	10.1	14.8	-7.56	2.75	-4.29	2.01	-5.68	-12.8	1.64	-9.18	2.49	-0.977	-0.996	9.95	0.675	4.01	0.883	-5.51	0.574	1.95	-5.29	3.41	1.6	4.28	2.52	-1.05	0.789	2.36	1.57	1.39	-0.51	-1.19	-2.11	0.619	-0.31	10.6	7.22	-1.23	-1.84	-5.59	-3.08
cg00480142	12	96046743		NA	1	turquoise	9.48	0.962	0.598	1.04	4.78	-1.9	8.92	17.7	8.35	5.11	-5.51	3.55	3.83	3.03	1.75	1.65	2.31	6.11	16.9	3.84	12.1	-1.54	10.9	7.41	-3.52	2.06	5.55	5.28	3.1	-4.82	3.69	9.97	1.38	2.57	1.74	0.997	-4.07	-2.14	0.348	0.747	1.81	1.45	2
cg00480231	2	2196537	MYT1L	23040	4	yellow	-5.05	16	8.8	18.2	-3.86	8.16	-4.35	-0.186	-9.96	-10.3	6.36	-9.59	6.98	-0.608	-0.101	13	-1.25	-0.0874	-3.56	-0.811	-2.93	6.25	-7.14	2.6	3.29	8.61	-0.508	-1.45	3.54	6.92	2.38	1.1	-0.56	-1.88	-2.26	-0.0731	0.784	12.7	7.6	1.03	-2.05	-5.43	0.193
cg00480381	16	7382796	A2BP1;A2BP1;A2BP1;A2BP1;A2BP1;A2BP1;A2BP1;A2BP1;A2BP1	NA	7	black	4.63	-7.87	-10.4	-1.15	18.9	0.263	16.1	4.53	5.26	10.9	-2.24	2.58	9.65	-2.01	3.17	-3.28	1.62	-3.17	5.13	10.1	4.92	-0.601	5.12	2.96	-1.15	0.241	1.11	1.79	1	0.159	2.59	1.89	1.04	2.87	2.37	-1.12	0.234	-8.01	-0.261	3.13	1.26	4.36	5.45
cg00481600	15	65503829	CILP;CILP	8483	3	brown	-2.15	16.5	23.7	7	-14.6	4.98	-9.31	-0.54	-2.02	-8.34	4.39	-0.634	-3.36	7.77	-0.827	14.2	3.23	9.55	-1.98	-2.87	-2.04	2.28	-1.49	5.84	4.64	7.13	1.15	4.79	6.69	5.73	-0.296	-2.02	3.45	1.37	0.00516	0.797	1.35	9.56	4.1	0.418	1.76	-1.68	-3.18
cg00482994	6	32945234	BRD2;BRD2	6046	5	green	-1.07	-8.42	-13.7	-0.147	18.1	1.15	10.1	2.03	-0.821	7.22	1.37	-0.774	10.1	-5.39	2.84	-5.17	-4.02	-9.38	1.17	7.48	0.0678	4.2	0.665	-1.51	-1.44	0.545	-2.78	-2.44	-2.69	-0.221	4.87	5.33	-0.886	1.42	1.38	0.109	0.509	-2.86	0.358	2.71	0.923	1.96	6.25
cg00483893	11	60501032		NA	2	blue	-1.96	14.9	17.2	8.76	-7.63	6.93	-5.65	1.61	-1.89	-5.51	4.76	-0.602	0.913	8.09	-0.649	15.1	2.13	8.7	-0.703	0.453	-0.537	4.26	-0.0111	7.88	3.54	10.6	1.97	6.13	8.08	6.92	1.36	-0.193	3.92	0.856	0.246	1.19	1.91	9.7	4.94	1.27	1.65	0.297	-0.0643
cg00484122	2	20579065		NA	3	brown	-2.72	16.1	24	8.26	-12.6	5.99	-8.69	0.0724	-2.56	-7.77	4.88	-0.922	-2.07	7.57	-0.598	16.3	2.75	8.66	-2.12	-1.83	-1.93	2.81	-1.28	5.45	4.64	7.59	0.845	3.71	7.99	5.83	-0.285	-0.926	3.02	1.11	-0.484	1.98	0.453	9.96	3.85	1.12	1.37	-2.86	-3.82
cg00484803	2	157196299		NA	2	blue	-1.57	23	11.8	16.5	-8.83	3.81	-5.3	-0.675	-7.17	-15	3.81	-10.3	2.32	-1.09	-0.923	11.6	0.601	4	-1.03	-5.92	-2.33	3.6	-7.74	3.29	3.72	4.72	2.21	-1.39	1.16	4.64	3.05	-0.0263	0.553	-0.382	-1.6	0.79	1.03	13.6	8.4	-0.443	-0.646	-6.07	-2.98
cg00486352	10	126139435	NKX1-2	390010	3	brown	-3.01	12.1	22.1	5.78	-10.1	6.71	-8.18	0.482	-1.17	-3.97	4.85	2.19	-1.8	10.8	-0.949	15.1	1.5	9.42	-2.09	0.645	-1.46	3.89	1.17	5.43	4.11	9.33	0.816	6.34	10.3	6.38	-0.0585	-0.451	2.9	0.146	0.0282	0.692	-0.408	8.67	1.89	0.669	1.07	0.0562	-1.37
cg00486358	18	54309442		NA	2	blue	0.595	24.7	15	13.5	-10.5	2.99	-4.92	0.325	-4.1	-13.3	2.23	-7.21	0.454	1.06	-0.804	12.9	3.4	7.47	0.557	-5.6	-0.437	1.52	-5.38	4.89	4.84	3.98	3.35	0.67	3.02	4.37	2.08	-0.715	0.94	0.343	-1.56	0.666	0.595	11.7	7.28	-0.618	-0.437	-5.46	-4.45
cg00489660	11	57089821	TNKS1BP1	85456	10	purple	1.41	-11.6	-6.08	-6.21	14.4	2.36	7.74	3.55	7.15	20	0.411	10.3	6.05	5.11	3.73	-3.16	1.02	-1.05	2.12	13.2	2.89	0.415	10.1	2.19	0.0185	2.24	-1.92	3.91	4.73	1.43	-0.145	1.47	1.29	1.59	2.29	0.21	0.117	-9.26	-4.94	4.49	2.07	7.76	5.3
cg00489795	22	24041104	LOC91316;RGL4	NA	2	blue	-1.18	21.8	10.2	15.3	-10.1	1.38	-5.36	-1.24	-8.33	-19	2.16	-12.7	0.827	-3.34	-1.38	9.76	1.22	2.74	-1.14	-8.02	-1.89	1.38	-9.66	1.99	3.03	2.43	1.88	-2.7	-0.443	2.43	1.34	-0.719	-0.94	-1.54	-3.35	-0.006	0.964	12.5	8.39	-1.73	-2.51	-7.67	-4.54
cg00489902	12	133260711	POLE	5426	2	blue	-3.96	24.7	12.9	17.5	-9.97	5.06	-7.49	-0.79	-10.3	-17.2	5.06	-11.2	2.51	-1	-0.908	12.9	0.151	1.88	-2.97	-5.74	-3.13	3.93	-8.78	2.91	3.36	6.25	0.401	-1.47	1.52	4.8	1.29	-0.214	-0.0172	-1.31	-2.14	0.731	0.879	13.6	8.02	-0.31	-1.87	-7.29	-3.83
cg00490075	13	27359547		NA	3	brown	-2.41	8.24	17.6	2.32	-9.67	5.24	-7.72	-0.127	0.378	-2.03	4.34	4.41	-3.7	12	-1.16	11.3	2.44	9.29	-2.11	0.751	-1.89	2.52	2.21	5.71	3.77	7.4	1.02	6.86	10.9	5.34	-0.993	-1.74	4.9	1.59	1.69	1.79	-0.876	6.01	1.37	0.576	2.99	0.58	-1.27
cg00491412	2	149859732	KIF5C	3800	5	green	2.21	-9.45	-11.5	-1.45	24.5	2.3	14.5	4.02	4.06	13.4	0.809	3.39	11.2	-1.29	3.42	-3.46	0.762	-4.81	3.6	12.8	2.85	1.77	5.25	3.59	0.312	1.99	-0.655	2.94	1.46	1.87	3.71	2.93	1.41	3.5	2.65	0.323	1.06	-7.26	-0.977	3.94	2.38	4.74	6.12
cg00491523	16	6913336	A2BP1;A2BP1;A2BP1	NA	5	green	3.19	-11.7	-5.76	-8.19	11.3	0.919	9.49	3.25	9.79	17.5	-0.794	11.8	2.38	4.98	1.48	-3.28	-0.0686	0.976	4.16	11.9	2.82	0.711	10.3	1.84	-0.215	0.733	1.17	5.6	4.75	0.783	2.55	2.37	2.39	3.07	4.27	0.377	-0.166	-7.49	-4.98	2.12	4.61	7.73	6.39
cg00491530	12	53437765		NA	2	blue	-2.21	20.5	12	14.3	-9.13	4.16	-5.8	-1.13	-7.36	-13.9	3.77	-9.11	1.76	-0.419	-0.777	11.3	1.11	3.37	-1.99	-5.35	-2.27	3.08	-7.51	3.09	3.98	4.73	1.47	-0.481	1.33	5	1.83	-0.739	1.34	0.403	-1.87	-0.506	1.63	12.1	8.19	-0.648	-0.415	-5.91	-4.88
cg00491548	19	3539158	C19orf28;C19orf28;C19orf71;C19orf71	NA	2	blue	-2.95	21.4	15	16.8	-6.68	7.31	-4.93	1.68	-6.65	-9.8	5.32	-6.22	4.56	3.15	0.324	17.2	1.12	4.12	-1.18	-1.16	-1.14	5.24	-3.89	6.08	3.97	9.75	1.12	1.91	6.05	6.49	2.48	1.24	2.94	1.16	-0.436	0.975	0.258	13.1	8.74	1.69	0.283	-5.19	-1.42
cg00493363	7	106619774		NA	2	blue	0.898	22.4	10.5	15.6	-7.75	2.38	-3.26	0.783	-5.26	-14.2	1.49	-10.1	2.42	-1.52	-0.911	10.7	1.29	4.98	1.12	-5.71	0.142	2.13	-6.6	4.01	2.33	3.8	3.52	-0.921	0.862	3.35	3.09	0.127	-0.269	-0.798	-2.06	-0.552	0.389	11.8	7.93	-1.29	-1.75	-5.55	-3.16
cg00493422	4	57547872	HOPX;HOPX;HOPX	84525	4	yellow	-1.49	18.3	9.62	18.8	-4.56	5.34	-2.13	1.24	-7.06	-11.2	4.12	-10.3	5.68	-1.34	0.0651	13.4	1.92	2.12	-0.372	-2.1	-0.893	3.48	-6.27	4.88	4.43	6.05	1.73	-0.12	3.61	5.18	2.74	1.01	0.42	-0.272	-1.8	-0.0158	1.94	11.1	9.14	1.32	-1.26	-6.21	-0.834
cg00494544	3	195268648	PPP1R2	5504	5	green	1.56	-6.3	-10	1.57	22.4	2.79	14.2	6.37	1.88	10	0.6	0.865	14.2	-2.21	3.3	-1.77	-1.78	-5.38	4.53	11.8	3.72	3.27	4.51	2.66	-1.69	3.59	-0.458	1.78	0.952	0.782	4.46	5.79	0.791	2.05	2.22	-0.292	-0.229	-4.57	1.31	3.29	1.32	3.45	7.86
cg00495311	3	120068861	LRRC58	116064	6	red	-8.45	4.89	5	8.19	1.54	17.2	-2.73	-0.127	-6.44	-0.282	12.9	-0.946	8.23	4.26	1.51	9.89	-2.51	-1.55	-5.09	7.26	-5.76	10.9	-1.59	3.29	5.76	12.5	-3.36	2.8	7.28	12.3	3.95	2.5	3.38	1.79	1.39	1.28	1.78	7.35	3.59	4.06	2.21	0.577	3.73
cg00495476	6	168061660		NA	5	green	2.39	-11.7	-11.2	-4.07	20.5	0.76	13.4	3.56	5.36	14.8	-1.24	5.3	7.94	-0.291	2.74	-4.74	-0.534	-3.93	3.33	12.2	3.5	1.01	6.29	0.926	-1.21	0.72	-0.474	1.89	1.8	0.271	2.39	2.82	0.746	1.84	2.79	-0.176	-0.0628	-7.99	-2.03	2.94	2.2	5.55	6.69
cg00496026	10	102766610	LZTS2	84445	2	blue	-0.993	19.2	15.8	10.5	-11.2	3.07	-7.01	0.45	-3.76	-10.9	2.55	-4.65	-0.764	3.44	0.0402	12.6	1.53	7.43	-0.358	-4.45	-0.576	2.08	-3.21	5.11	2.41	5.96	1.22	1.84	3.82	3.65	0.675	-0.94	1.72	-0.0508	-1.3	1.06	0.544	10.7	5.67	0.0388	-0.242	-4.3	-3.63
cg00496272	16	67877232	CENPT;THAP11	NA	10	purple	2.67	-10.4	-7.26	-4.62	14.6	2.54	9.42	3.88	6.46	17.1	-0.249	7.54	7.06	2.77	3.02	-3.56	2.24	-1.77	2.98	11.6	3.61	-0.445	8.61	2.62	0.732	1.02	-0.155	3.86	3.08	1.77	0.442	1.33	1.8	2.4	3.46	1.26	0.18	-9.78	-2.92	3.88	2.85	6.69	4.9
cg00498211	2	65217568	SLC1A4;SLC1A4	6509	5	green	2.68	-8.66	-9.71	-1.22	21.1	1.78	13.8	5.03	4.27	14	-0.497	3.62	11.2	-0.24	3.21	-2.9	0.897	-3.98	4.04	12.6	4.11	0.734	6.42	3.36	-0.791	2.07	0.0392	3.21	2.56	0.877	2.12	2.85	1.29	2.33	1.3	-0.59	0.306	-7.74	-0.328	2.92	1.06	4.66	5.04
cg00498305	10	119000236	SLC18A2	6571	3	brown	-0.774	14.8	20.2	7.8	-10.6	5.23	-6.7	0.474	-1.21	-6.29	3.83	-0.379	-1.39	7.39	-0.68	15.3	3.18	9.31	-0.67	-1.59	-1.05	2.27	-0.503	5.92	4.67	6.64	2.03	3.9	8.07	5.73	0.632	-1.05	2.51	0.463	0.399	0.513	0.428	9.12	3.81	0.452	1.61	-2.13	-2.98
cg00499539	2	113960266	PSD4;LOC440839	23550	2	blue	-1.64	22.3	13.5	15.7	-8.11	5.14	-5.53	0.13	-6.42	-11.5	4.34	-7.77	3.19	1.44	0.00554	13.2	2.97	4.36	-1.44	-3.95	-1.43	2.44	-5.46	5.6	4.7	6.43	1.49	0.881	3.13	5.94	0.802	-1.26	1.7	-0.00705	-1.24	1.39	0.975	10.9	8.42	0.494	-0.324	-6.13	-4.74
cg00499707	20	34679665		NA	5	green	1.84	-5.08	-8.96	2.5	20.1	2.67	13.1	4.88	1.44	9.52	0.393	0.271	14.5	-2.21	3.67	-1.11	-0.494	-5.07	3.61	10.9	3.43	2.64	3.87	3.03	-0.605	2.98	-0.478	1.13	1.56	1.51	4.14	4.01	-0.164	0.713	1.24	0.128	-0.475	-3.95	1.7	3.7	0.162	1.16	5.95
cg00500100	5	140098250	VTRNA1-2	56663	22	darkgreen	-9	3.88	3.76	5.95	1.02	11.7	-3.15	-0.261	-6.34	-0.829	11	-0.848	5.84	3.26	-1.64	7.32	-9.39	-1.96	-4.11	5.39	-6.57	20	-1.83	1.7	1.39	12.5	-1.39	2.01	4.92	8.44	10.8	5.98	3.77	1.98	2.59	2.1	0.757	12	4.34	0.732	3.6	-0.0228	5.69
cg00500213	22	21337671	LZTR1	8216	13	salmon	0.814	-3.09	-6.9	4.32	17.3	5.23	11.3	5.41	0.202	7.85	2.1	-0.411	16.8	-1.36	3.93	0.72	-0.772	-4.74	2.92	11.4	3	3.83	3.49	3.73	0.127	5.38	-0.966	1.8	2.01	3.55	3.85	4.25	0.19	1.42	1.28	-0.152	0.984	-3.02	1.3	4.34	1.38	1.32	7.1
cg00501622	9	139563832	MIR126;EGFL7;EGFL7	NA	10	purple	3.28	-9.84	-2.96	-7.82	10.3	2.53	7.17	3.73	10.7	21.9	-0.0059	14.7	3.28	9.04	2.95	-1.87	3.12	2.76	3.26	13.1	3.55	-0.23	13.4	5.57	0.782	2.99	0.238	8.26	6.33	2.54	0.357	-0.041	3.81	4.15	3.85	0.775	0.512	-9.35	-5.2	3.87	4.25	8.38	4.53
cg00501869	7	157690732	PTPRN2;PTPRN2;PTPRN2	5799	2	blue	1.08	19.1	9.03	14.3	-7.83	0.28	-3.19	0.593	-5.7	-15	0.778	-11.4	1.34	-3.18	-0.677	9.17	3.48	3.62	0.881	-7.08	0.177	-0.469	-7.02	3.64	3.29	1.71	2.84	-2.12	0.134	1.19	0.889	-0.327	-0.643	-0.729	-2.51	0.889	0.479	9.5	8.16	-1.33	-1.4	-7.72	-4.31
cg00501876	3	39193251	CSRNP1	64651	10	purple	1.24	-10.4	-6.04	-5.38	14.4	3.29	8.56	3.65	6.54	19.1	0.904	9.48	6.51	4.79	3.98	-2.42	1.34	-1.2	2.22	13.6	2.62	1.31	9.63	3.62	0.519	3.22	-1.54	5.46	4.5	2.75	1.15	1.49	2.03	2.56	2.22	0.0973	1.53	-8.47	-4.25	5.21	2.2	7.97	5.94
cg00502041	16	64650041		NA	2	blue	-2.47	18.1	15.6	12.1	-8.76	5.89	-6.32	1.18	-5.15	-9.36	4.33	-4.58	1.61	4.04	-0.737	14.6	2.23	5.36	-1.52	-2.14	-0.819	2.81	-2.87	5.65	3.32	7.82	1.33	2.92	5.77	5.32	-0.0539	-0.424	1.51	-0.0687	-1.12	1.3	-0.158	10.2	5.2	0.67	-0.682	-5.4	-2.8
cg00502062	1	201578212		NA	4	yellow	-2.19	19.6	10.7	17.1	-5.95	5.8	-2.85	0.256	-7.08	-11.7	5.56	-9.16	4.44	-0.458	-0.0477	13.8	1.32	3.39	-0.757	-2.46	-2.53	4.6	-6.98	4.54	5.34	6.26	1.61	0.413	3.62	6.17	3.87	0.816	0.395	-0.271	-2.06	-0.583	1.81	13	7.8	0.868	-0.587	-6.95	-2.15
cg00502575	13	114800841	RASA3	22821	2	blue	-2.04	19	11.3	14.2	-7.9	4.5	-5.24	0.643	-6.98	-12.5	3.73	-8.4	2.36	-0.024	-0.887	11.8	0.829	3.24	-0.963	-4.23	-1.31	3.24	-6.02	3.43	2.92	5.48	1.38	-0.631	3.02	4.18	1.59	0.743	-0.619	-1.91	-2.09	0.546	0.0438	11.8	6.19	-0.241	-1.88	-5.92	-3.53
cg00502926	14	21510056	RNASE7	84659	4	yellow	-1.37	19.2	9.66	18.9	-4.87	4.74	-1.9	0.707	-7.27	-12.2	4.14	-10.6	5.17	-1.86	-0.254	13.5	1.66	2.27	-0.251	-2.54	-1.3	3.69	-7.14	4.31	4.82	5.3	1.74	-0.4	3.66	5.08	3.38	1.02	0.146	0.124	-1.82	0.0638	0.948	11.8	8.86	0.593	-0.924	-6.72	-1.37
cg00504226	21	45344525	AGPAT3;AGPAT3	56894	8	pink	3.64	0.796	-0.467	1.5	4.06	-0.649	5.17	18.3	2.94	2.25	-2.68	1.25	3.32	1.35	-0.468	1.06	-2.85	1.99	12.4	3.03	8.31	1.47	7.75	3.92	-6.71	3.75	3.47	3.16	1.68	-6.93	3.52	16.3	-0.461	-0.00431	0.607	1.74	-5.63	0.593	-0.482	-1.1	0.255	-0.395	1.37
cg00504248	3	195687741	SDHAP1	255812	8	pink	6.66	0.431	-0.855	2.13	8.21	1.29	10	17.3	6.7	6.47	-2.98	3.41	7.33	3.33	2.41	1.96	2.12	3.91	12.9	6.95	10.9	-0.374	10.7	8.03	-3.65	5.01	3.56	6.32	3.33	-2.36	2.38	8.92	3.45	3.24	3.98	2.5	-3.14	-3.28	1.68	2.17	3.51	1.62	3.19
cg00504341	1	4842718	AJAP1	55966	5	green	2	-11.7	-6.52	-6.85	14.1	2.37	9.61	3.8	8.12	19.2	-0.0103	11.2	4.57	5.01	2.81	-2.96	-0.441	-0.388	3.24	14.3	3.02	1.62	10.5	2.81	-1.28	2.59	-0.511	5.56	5	1.48	2.07	2.29	2.66	2.77	4.1	1.04	-0.611	-7.72	-4.55	3.29	3.78	7.11	5.14
cg00504782	1	111037272		NA	5	green	-1.26	-11.3	-8.99	-3.6	19	3.92	9.86	3.24	2.67	15.2	2.16	6.13	8.87	1.69	2.49	-2.63	-1.98	-5.76	0.64	15.4	1.24	3.58	6.58	1.72	-0.824	4.27	-2.52	3.93	3.8	1.97	1.96	3.45	1.89	2.55	3.35	0.124	-0.113	-6.52	-2.25	3.4	2.91	5.33	7.6
cg00505001	13	36049807	MAB21L1;MIR548F5;NBEA	NA	3	brown	-1.02	11.2	18.7	5.56	-9.45	5.02	-5.74	1.56	0.176	-4.03	3.41	1.68	-2.16	8.88	-0.262	13.9	2.84	9.76	-0.0528	0.173	-0.368	2.51	1.45	6.11	3.87	6.96	1.49	5.47	9.62	4.57	0.545	0.0376	2.89	0.949	0.204	0.977	0.165	7.79	2.29	1.37	1.71	-1.42	-0.837
cg00505133	1	95320459	SLC44A3;SLC44A3	126969	3	brown	-1.38	11.7	17.5	5.8	-9.62	5.87	-6.88	0.308	-0.327	-4.48	4.19	1.03	-1.73	8.37	-0.623	12.5	2.41	9.39	-1.02	-0.586	-1.33	2.74	0.572	5.33	4.6	6.88	1.78	4.42	7.49	6.02	0.652	-0.988	2.89	1.01	-0.443	2.49	0.878	7.87	2.3	0.484	2.31	-0.503	-2.03
cg00505318	3	69130918	UBA3;UBA3	9039	2	blue	-1.46	24.4	13.2	14.9	-9.4	3.92	-5.39	0.462	-6.51	-14.1	3.27	-8.7	1.81	0.402	-0.917	12.4	1.22	4.82	-0.547	-5.15	-1.09	3.01	-6.28	4.75	2.79	5.82	2.19	1.18	1.86	4.33	2.2	-0.238	0.00591	-1.19	-2.47	0.3	0.85	12	6.8	-0.317	-1.47	-5.4	-3.16
cg00506299	3	16469127	RFTN1	23180	5	green	2.81	-9.79	-12	-2.16	21.3	0.668	14.7	4.07	4.51	12.1	-1.41	3.05	9.31	-2.04	2.55	-4.6	-0.368	-4.67	4.13	10.9	3.7	0.941	5.07	1.62	-1.29	0.489	-0.027	1.85	0.755	0.0477	3.2	2.99	0.406	1.96	2.13	-0.353	0.0589	-7.65	-1.36	2.48	1.1	4.46	5.65
cg00507497	18	34838423	BRUNOL4;BRUNOL4;BRUNOL4;BRUNOL4	NA	5	green	-0.368	-10	-7.44	-3.15	18.2	4.75	10	3.59	4.1	16.7	3.04	7.25	8.99	3.02	3.37	-1.27	-1.33	-3.49	1.75	16.7	1.04	4.58	7.72	3.45	0.568	4.75	-2.14	5.26	5.42	3.42	3.99	3.6	2.97	2.89	3.26	-0.188	1.9	-5.26	-1.38	4.35	3.3	5.93	8.63
cg00508855	5	179287084	C5orf45;C5orf45	51149	5	green	2.68	-4.67	-10.3	2.98	18	0.897	13.3	4.56	1.01	6.94	-0.718	-2.04	13.4	-4.91	1.59	-2.23	-0.157	-5.63	4.2	7.84	3.63	1.24	1.89	1.69	-0.392	0.844	1.16	-0.923	-0.589	0.123	3.65	3.85	-1.43	-0.162	0.208	-0.604	-0.569	-4.32	0.703	1.8	-1.35	1.47	5.73
cg00509136	19	50141490	RRAS	6237	3	brown	-0.904	12.7	24.7	3.68	-14.3	4.1	-9.49	-0.173	0.846	-4.94	3.17	3.07	-5.35	11.1	-0.674	12.8	3.04	12.2	-1.17	-2.22	-1.09	1.37	1.56	5.71	3.57	6.34	1.37	5.82	7.98	4.96	-1.02	-2.32	3.39	0.643	0.396	1.99	0.44	7.52	1.21	0.501	2.19	-0.186	-3.4
cg00509772	20	32273129	E2F1	1869	2	blue	-0.387	18.5	19.2	9.56	-10.4	4.43	-5.93	1.55	-1.95	-8.07	2.86	-2.23	-0.543	6.27	-1.17	14.9	3.15	9.15	0.178	-2.1	0.258	1.83	-1.16	7.43	2.78	7.65	2.49	5.28	6.47	4.85	0.309	-1.13	2.63	0.598	-0.918	0.699	1.29	9.13	4.98	-0.386	0.83	-2.65	-3.67
cg00510437	12	110384506	GIT2;GIT2;GIT2;GIT2;GIT2	9815	10	purple	2.86	-10.8	-4.31	-8	10.7	1.08	8.13	4.46	9.65	18.8	-0.87	13	2.68	6.89	2.45	-2.51	0.61	1.38	3.93	12.6	3.97	0.566	12.3	3.16	-0.923	2.32	-0.137	7.4	5.97	0.573	0.861	2.35	3.33	3.2	4.95	0.819	0.136	-8.13	-4.69	3.02	4.89	7.73	6.26
cg00511027	7	1062887	C7orf50;C7orf50;MIR339;C7orf50	NA	5	green	4.53	-5.83	-10.2	1.34	22.4	0.775	17.5	5.36	4.16	9.46	-0.982	0.599	12.3	-2.89	3.69	-2.09	1.17	-3.68	6.09	10.3	4.57	1.16	4.25	4.67	-0.291	1.53	0.884	2.16	0.818	0.859	5.11	3.56	0.228	2.49	1.33	-0.24	0.985	-5.43	0.917	2.96	1.43	2.12	5.46
cg00513564	13	44388673		NA	3	brown	-2.8	16	20	7.59	-13.4	5.1	-9.85	-0.0404	-3.09	-8.69	4	-1.55	-2.46	6.64	-1.67	13.1	0.876	8.21	-2.03	-3.54	-1.77	2.89	-1.68	3.91	2.61	7.11	1.13	2.84	5.48	4.93	-0.341	-0.995	2.11	-0.0672	-0.845	1.02	0.684	9.98	3.21	-0.51	0.711	-2.48	-3.62
cg00513981	7	5642784	FSCN1	6624	5	green	2.73	-9.64	-15.3	-1.55	19.7	-1.5	13.7	6.08	1.99	8.59	-2.55	0.101	8.81	-5.55	2.81	-6.58	-2.8	-7.3	5.64	6.91	4.36	0.719	3.57	-0.604	-4.58	-1.22	-0.559	-1.47	-2.66	-4.09	3.5	6.6	-1.98	0.141	0.41	-0.772	-1.62	-6.3	-1.32	1.73	-0.65	2.02	5.49
cg00516067	20	61447530	COL9A3	1299	10	purple	2.02	-10.8	-3.99	-8.53	10.1	1.55	6.36	3.82	8.79	19.1	-0.221	13.6	2.34	7.47	2.86	-3.03	1.63	1.03	2.79	11.6	3.01	-0.233	11.9	2.96	-0.154	1.95	-0.931	7.16	4.92	0.799	-0.357	1.63	2.55	2.46	2.81	0.102	-0.239	-8.91	-6.14	3.73	3.73	8.78	5.21
cg00516881	19	4493907	HDGF2;HDGF2	NA	5	green	6.1	-5.16	-9.35	0.656	18.4	-1.18	16.6	8.36	5.13	8.86	-3.3	1.18	10.2	-2.42	3.07	-2.82	1.33	-2.24	8.56	8.35	7.4	-0.487	5.83	4.49	-2.34	0.78	2.12	2.1	0.213	-2.08	3.75	5.3	-0.123	2.05	1.09	0.257	-1.4	-5.9	0.277	1.86	1.21	2.49	4.75
cg00517080	11	134098583	VPS26B	112936	7	black	2.96	-6.92	-10.4	0.374	20.9	1.34	15.4	4.44	3.26	10	-0.331	1.56	11.5	-2.58	3.25	-2.4	-0.339	-4.43	4.57	10.8	3.34	1.93	3.75	2.06	-0.118	1.37	0.291	1.33	1.16	0.913	4.66	4.08	-0.138	2.04	1.58	-0.833	0.908	-4.98	-0.16	3.4	1.61	2.96	6.46
cg00518190	1	6294768	ICMT	23463	5	green	-0.222	-4.42	-8.56	3.59	18.1	4.51	11	3.01	-0.647	7.11	2.34	-0.936	14.8	-2.71	1.97	-0.232	-1.82	-6.02	1.43	10.9	1.11	4.39	1.26	1.45	0.426	3.78	-0.234	0.207	1.85	3.39	4.4	3.72	0.101	0.835	1.29	-0.423	1.19	-2.1	2.16	2.55	0.746	3.05	6.92
cg00519537	16	7796774		NA	2	blue	0.866	23	14.8	12.2	-10.1	2.69	-4.77	-0.129	-3.05	-11.9	2.13	-6.19	0.146	1.88	-1.13	12.5	2.51	8.73	0.644	-5.01	-0.499	2.47	-4.75	5.03	4.21	4.51	4.02	1.34	3.2	4.58	3.25	-0.641	1.15	-0.151	-1.65	0.964	1.18	13.3	7.34	-0.94	-0.45	-4.71	-3.57
cg00520135	15	63333846	TPM1;TPM1;TPM1;TPM1;TPM1;TPM1	7168	5	green	2.53	-7.74	-7.24	-1.78	17.9	2.56	13	5.53	5.26	12.7	-0.968	5.48	8.93	1.64	1.95	-0.952	0.444	-1.74	4.06	14	4.94	1.35	7.6	3.94	-1.68	3.52	0.585	4.11	4.63	1.2	2.04	3.02	2.2	2.3	3	0.245	0.151	-6.29	-1.18	1.69	2.15	4.38	5.48
cg00522231	2	9549277	ITGB1BP1;ITGB1BP1	9270	5	green	3.83	-8.95	-15.9	-0.606	22.5	-1.6	16.5	3.96	2.85	8.8	-2.17	-0.461	10.3	-6.15	3	-6.34	0.353	-6.81	4.92	7.45	3.69	-0.42	2.27	0.453	-1.07	-2.18	0.121	-1.3	-2.58	-2.01	3.33	3.68	-0.986	1.74	1.28	-0.53	0.363	-6.98	0.307	2.13	0.446	2.52	5.24
cg00522276	8	67452722		NA	3	brown	-3.27	13.5	22.8	6.25	-12.5	6.31	-10.3	0.169	-2.65	-6.16	4.98	0.676	-2.64	9.14	-0.4	14.1	2.11	8.35	-2.59	-1.7	-2.08	2.88	-0.148	4.89	4.1	8.09	-0.0802	4.39	7.72	5.63	-1.08	-0.832	3.12	0.838	-0.0602	1.77	0.548	8.93	2.25	1.72	1.8	-2.07	-2.6
cg00523241	16	30688961		NA	3	brown	-1.65	13.5	17.3	7.4	-8.76	5.55	-6.46	2.05	-1.87	-5.35	4.25	0.0345	-0.32	8.05	0.156	14.3	3.26	8.01	-0.572	-0.0625	-0.294	2	0.643	7.93	3.15	8.84	0.82	6.26	8.24	5.05	-1.01	-0.737	2.9	0.418	0.665	2.05	-0.113	7.71	3.47	0.768	1.58	-2.26	-2.08
cg00523379	6	148726218	SASH1	23328	3	brown	-1.95	19.4	17.4	11.3	-11.4	5.25	-7.98	0.174	-4.56	-10.6	3.77	-4.56	-0.09	3.87	-0.995	13.5	2.35	6.48	-1.7	-4.19	-1.2	2.18	-3.51	4.28	3.53	6.31	1.46	1.8	4.22	5.21	-0.331	-1.17	2.16	0.377	-0.772	1.36	0.177	10.2	5.88	0.571	-0.302	-4.58	-3.77
cg00524899	2	133635152	NCKAP5;NCKAP5	344148	8	pink	3.64	2.68	2.46	3.52	4.19	2.61	4.88	21.3	3.33	3.71	-1.56	2.57	5.85	4.5	1.87	4.48	0.871	3.59	11.3	5.59	9.57	0.219	9.9	7.47	-4.28	6.82	1.92	6.32	5.03	-3.64	0.458	11.4	1.44	1.49	1.58	2.49	-5.54	-1.25	0.4	1.45	1.52	0.172	1.15
cg00525044	8	144369512		NA	22	darkgreen	-8.99	5.31	7.18	7.26	0.974	15	-3.53	1.69	-5.31	0.582	12.2	1.19	7.15	7.45	0.83	11.9	-4.86	0.118	-3.92	8.55	-5.09	14.1	0.645	4.79	3.52	18.2	-2.95	4.82	9.85	10.1	5.07	4.75	3.22	0.474	1.67	2.36	0.819	9.07	2.34	3.73	1.62	0.0279	3.17
cg00525496	6	11203784	NEDD9;NEDD9;NEDD9	4739	2	blue	-1.28	22.8	13	15.7	-8.24	3.87	-4.94	1.13	-6.39	-12.9	3.32	-8.42	2.54	0.615	-0.86	13.1	1.07	4.3	-0.236	-4.33	-0.675	3.17	-5.31	4.74	2.66	6.26	2.11	0.284	2.96	3.88	1.95	0.691	1.07	-0.5	-1.47	1.74	0.625	12.7	8.44	-0.449	-0.567	-6.54	-2.91
cg00525597	1	973595	AGRN	375790	5	green	2.73	-5.28	-8.37	1.64	18.4	1.67	13.8	9.37	2.48	8.64	-1.2	0.86	12	-1.89	2.95	-1.19	-1.08	-4.06	6.59	10.2	6.12	1.79	5.81	3.31	-2.77	3.11	0.268	1.4	1.81	-1.38	3.43	7.75	-0.68	0.826	1.23	0.138	-2.71	-4.74	-0.366	2.71	0.517	1.22	5.29
cg00525722	2	112280286		NA	3	brown	-1.95	16.6	17.9	8.13	-11.5	4.18	-7.89	0.144	-3.05	-8.61	3.52	-2.18	-1.58	5.86	-0.99	13.2	2.2	7.62	-1.47	-2.97	-1.05	2.12	-1.85	5.72	2.92	7.14	1.67	3.59	5.16	4.69	-0.284	-1.46	2.21	-0.401	-0.821	1.17	0.55	9.39	4.52	0.436	0.413	-2.7	-3.41
cg00526835	10	93335140	LOC100188947	NA	2	blue	-0.588	24.4	12.3	15.7	-9.99	2.76	-5.61	0.167	-6.6	-15.9	2.31	-10.2	1.4	-1.03	-1	10.9	2.19	4.54	-0.335	-7.09	-0.74	1.41	-7.09	3.9	2.94	3.89	2.39	-0.872	0.638	3.48	1.16	-0.768	0.0471	-1.22	-2.65	0.754	0.558	11.3	7.96	-0.909	-2.07	-7.61	-4.62
cg00528616	16	75036318	ZNRF1	84937	5	green	0.314	-4.66	-9.44	3.03	17.9	3.48	10.6	3.69	-0.708	7.68	1.98	-1.32	15.2	-3.57	2.98	-1.76	-1.36	-6.84	2	9.04	1.69	3.22	1.88	1.6	-0.0151	2.96	-0.734	-0.289	-0.614	2.1	3.84	3.73	-1.36	0.194	-0.0659	-0.079	-0.129	-3.4	1.01	2.79	-0.879	2.77	5.63
cg00529236	16	85239958		NA	2	blue	-1.65	19.7	19.9	11.2	-10.7	5.67	-6.55	-0.0334	-3.46	-9	5.16	-3.14	0.267	5.57	-0.659	16.5	3.27	7.63	-1.28	-2.29	-2.13	3.27	-2.86	7.05	5.69	7.68	2.16	3.17	6.63	6.67	1.65	-1.15	3.5	1.34	0.252	1.06	1.45	11.5	6.7	1.09	1.14	-3.94	-3.07
cg00531009	11	64533347	SF1;SF1;SF1	7536	5	green	4.5	-5.38	-9.67	1.69	20.4	0.602	15.9	4.61	3.58	8.7	-0.721	0.239	12.2	-3.06	3.11	-1.74	2.1	-3.77	5.27	9.69	4.05	0.692	3.44	5.27	0.405	1.23	1.34	1.43	1.08	1.06	4.6	2.45	0.256	2.45	1.72	-0.473	0.709	-5.17	1.3	2.83	1.65	2.22	4.81
cg00531137	16	57643932		NA	3	brown	-1.53	18.9	16.9	10.2	-10.6	5.26	-6.64	-0.261	-3.14	-9.72	4.33	-3.73	-0.359	4.27	0.0747	13.8	2.55	8.12	-1.03	-3.15	-1.76	3.02	-3.53	5.28	5.14	6.51	1.55	2.99	4.71	6.34	1.54	-1.01	2.64	1.6	-1.07	8.54E-05	1.89	11	5.63	0.929	1.2	-2	-3.19
cg00531745	6	34191048		NA	2	blue	-3.13	17.1	14.4	11.8	-7.08	7.48	-6.09	0.48	-4.94	-7.37	5.73	-3.42	3.08	5.07	0.639	14	1.22	5.13	-2.06	-0.977	-1.9	4.68	-2.67	6.03	3.55	9.73	0.167	2.76	4.9	7.11	1.4	-0.605	2.82	-0.0909	-0.297	1.89	1.28	10.8	6.45	1.34	0.483	-2.97	-3.19
cg00532411	1	6241506	CHD5	26038	3	brown	-0.151	11.6	18.7	6.76	-6.79	6.64	-4.15	1.96	0.677	-2.03	3.61	2.62	0.592	11	-0.425	16.6	3.7	9.82	0.048	2.33	0.409	2.67	2.61	8.62	4.3	9.49	2.54	7.4	11.8	6.79	0.452	-1.24	3.44	0.504	0.472	1.42	0.0123	6.78	2.34	1.36	2.02	-1.08	-0.931
cg00534318	3	129032826		NA	5	green	1.14	-5.19	-6.33	1.52	17.1	3.87	11.7	5.12	2.33	9.72	0.322	2.56	11.9	0.675	3.2	0.592	0.0543	-3.44	2.98	13.3	4.06	2.43	5.1	3.35	0.241	4.19	-0.529	3.53	4.56	2.44	2.49	3.87	-0.104	0.816	1.41	0.0118	-0.805	-4.35	-0.959	3.94	1.45	2.99	6.34
cg00534380	2	101766586	TBC1D8	11138	5	green	4.38	-7.77	-6.65	-2.07	17.6	1.53	14.5	4.61	7.61	14.5	-0.171	6.08	8.61	2.24	3.83	-0.72	2.97	-0.535	5.01	14.1	4.27	0.513	8.29	6.58	0.842	2.68	0.762	5.31	5.23	2.1	3.36	1.44	2.73	3.53	3.56	0.434	0.78	-7.24	-0.85	3.76	3.87	4.66	6.09
cg00534468	16	81579629	CMIP;CMIP	80790	5	green	1.56	-4.99	-9.47	2.96	21.2	2.68	14	4.12	1.1	8.18	0.548	-0.428	14.7	-3.13	3.34	-0.813	-0.853	-5.43	3.24	11.1	3.03	3.15	2.54	2.83	-0.438	3.12	-0.445	0.752	1.32	2.07	4.57	3.65	0.00951	1.24	0.899	0.351	0.758	-3.62	1.52	3.42	0.586	1.77	6.14
cg00534655	5	139492727	PURA	5813	10	purple	1.4	-11.3	-10	-3.86	18.9	2.31	10.3	3.18	4.49	17	0.238	5.77	9.06	0.854	3.45	-4.61	0.222	-4.35	2.12	11.7	2.63	0.9	6.91	1.4	-0.27	1.26	-1.15	2.23	1.4	1.43	1.47	1.88	0.663	1.44	2.04	-0.164	0.269	-8.99	-2.54	4.4	1.2	6.83	6.62
cg00535027	4	8593933	CPZ;CPZ;CPZ	8532	3	brown	-2.62	14.1	17.4	6.72	-11.2	5.06	-7.9	-0.346	-2.53	-7.84	4.41	-1.1	-2.52	6.74	-1.59	12.5	0.864	8.01	-1.86	-1.79	-2.08	3.4	-1.41	5.15	2.67	7.38	1.26	4.84	6.71	5.35	0.733	-1.14	4.35	1.03	1.9	0.893	0.755	9.75	4.69	-0.628	2.6	-2.29	-2.08
cg00537121	11	67055633	ANKRD13D;ANKRD13D	338692	5	green	0.0494	-7.89	-8.75	-0.842	19.4	4.14	10.5	3.59	2.39	13	2.69	3.65	11.6	0.418	3.37	-1.93	-0.547	-4.8	1.99	13.4	1.42	3.5	5.08	3.61	0.774	4.38	-1.72	4.31	2.39	3.13	3.38	2.9	2.07	3.08	2.82	-1.16	1.45	-5.81	-0.543	3.52	2.77	6.53	7.14
cg00537210	2	23786588	KLHL29	114818	3	brown	-2.51	18.5	19.7	8.83	-13.4	5.41	-8.95	-0.33	-3.66	-10.2	4.07	-2.6	-2.03	5.6	-1.12	13.9	1.6	7.84	-1.91	-3.79	-1.85	3.05	-2.93	4.91	3.27	6.98	1.21	2.94	4.88	5.61	0.535	-1.24	3.48	0.793	0.524	2.01	0.656	11.1	5.69	0.0305	1.27	-3.45	-3.52
cg00537820	9	140346864	NELF;NELF;NELF;NELF	NA	5	green	1.54	-7.02	-5.53	-1.05	17.4	4.56	11.8	3.86	5.37	14.5	2.36	5.82	10.3	3.14	2.75	0.619	1.18	-1.43	3.01	16.7	2.11	3.37	7.03	5.31	2.63	4.79	0.35	6.13	6.29	4.36	4.46	2.67	1.85	2.51	2.1	-0.609	0.965	-4.76	-1.61	4.52	2.95	4.91	7.28
cg00538495	10	94429506		NA	22	darkgreen	-8.94	3.29	2.2	6.16	2.08	11	-2.03	-1.21	-6.89	-0.989	9.78	-1.82	6.6	1.75	-0.364	6.25	-9.53	-2.85	-4.77	5.72	-6.27	18.8	-3.06	-0.0941	1.68	11	-2.68	0.94	4.31	8.65	9.84	5.39	3.13	1.78	2.06	0.193	1.96	11.2	4.45	2.1	2.68	-0.285	6.44
cg00539154	1	7181893	CAMTA1	23261	4	yellow	-1.5	23.2	16	17	-7.47	6.01	-3.72	1.56	-5.34	-10.6	5	-6.61	3.5	2.44	-0.00139	18.6	3.4	5.61	-0.166	-1.46	-0.953	3.6	-4.28	7.68	5.6	8.05	2.15	2.63	6.63	6.14	2.49	0.45	1.72	0.497	-1.11	1.06	1.22	12.3	8.09	0.925	0.374	-6.03	-2.41
cg00539300	16	2895093		NA	3	brown	0.159	12.9	18.6	4.38	-12.9	2.6	-7.55	0.118	0.509	-6.83	2.03	0.618	-5.09	7.27	-1.86	11.2	3.27	11.5	0.118	-3.39	-0.658	1.01	-0.333	5.26	3.68	4.54	3.11	4.73	6.85	3.62	0.377	-1.42	3.04	1.23	0.195	0.387	0.745	8.19	2.41	-0.677	1.39	-0.936	-3.66
cg00539360	6	43737136	VEGFA;VEGFA;VEGFA;VEGFA;VEGFA;VEGFA;VEGFA;VEGFA;VEGFA;VEGFA;VEGFA;VEGFA;VEGFA;VEGFA;VEGFA;VEGFA	7422	2	blue	-3.54	19.8	12.7	15.4	-7.81	6.41	-6.24	0.11	-7.92	-11.8	5.55	-7.81	3.37	1.04	-0.854	13.6	0.597	2.75	-2.29	-3.07	-2.54	4.25	-6.04	3.84	3.86	7.41	0.768	-0.492	3.26	5.78	1.52	0.435	0.841	-0.961	-0.672	1.39	0.9	12.4	7.67	-0.00234	-0.244	-4.75	-2.63
cg00539955	22	44395433	PARVB	29780	5	green	2.12	-5.1	-7.88	1.48	18.3	2.42	13.1	10.6	2.74	9.13	0.32	1.73	11.8	-0.894	1.81	-0.627	-3.09	-3.47	7.57	11.4	5.08	4.16	6.46	3.81	-3.54	4.54	1.01	2.79	2.56	-1.34	5.96	10.2	1.15	2.07	2.96	0.42	-2.08	-3.04	0.521	2.11	1.87	2.26	6.5
cg00540067	3	126074344	KLF15	28999	3	brown	-2.03	19.2	17.5	10.3	-12.5	4.34	-8.79	-0.0694	-4.4	-11	3.41	-4.26	-1.02	4.18	-0.934	12.5	2.51	6.95	-1.73	-4.96	-1.23	1.54	-3.51	4.48	3.57	5.85	1.03	1.75	3.75	4.62	-0.914	-1.79	1.84	-0.221	-1.51	1.46	0.721	9.98	4.85	0.496	-0.327	-4.17	-4.53
cg00540819	10	134803507		NA	5	green	0.744	-8.23	-12.7	-0.257	19	0.0364	12.2	4.17	0.488	7.84	-0.244	-0.152	9.45	-4.69	2.02	-4.59	-3.22	-7.75	3.21	8.08	2.17	2.65	2.36	-0.573	-2.68	0.215	-0.846	-1.8	-0.833	-2	4.13	6.35	-0.572	0.857	1.42	0.0837	-2.25	-3.43	0.624	1.44	0.49	0.767	5.21
cg00542975	2	122392291	CLASP1;CLASP1;CLASP1	23332	2	blue	-2.58	19.3	18.9	11	-9.69	6.93	-7.1	1.18	-4.06	-8.1	5.07	-2.67	1.09	6.25	0.825	15.8	2.13	7.03	-1.45	-1.46	-1.17	3.89	-1.85	6.03	4.36	9.25	0.327	4.37	6.35	6.46	0.655	0.0928	2.44	0.86	-0.77	0.861	0.301	11.5	4.86	1.47	0.485	-2.93	-3.29
cg00543976	1	112058750	ADORA3	140	10	purple	2.07	-9.7	-2.46	-7.87	9.4	1.93	6.18	4.52	9.42	20.1	0.137	14.8	2.68	9.36	2.57	-1.36	1.94	2.11	3.02	13.2	3.58	0.473	13.7	4.98	-0.481	3.55	-0.471	8.65	7.43	1.16	0.172	1.48	4.25	3.63	4.53	0.144	-0.491	-8.12	-4.27	3	5.03	9.15	5.31
cg00546971	1	4207818		NA	2	blue	-2.33	21	13.4	12.6	-11.5	3.31	-7.19	-1.41	-6.85	-15.3	3.65	-8.34	-0.324	0.138	-1.14	11.4	1.82	4.57	-2.19	-6.46	-2.77	1.95	-7.36	2.91	3.93	4.01	1.39	-0.414	1.85	4.01	0.734	-1.43	0.279	-1.12	-2.42	-0.558	0.857	11.9	6.2	-0.424	-1.62	-6.43	-4.16
cg00547480	10	103875961	LDB1;LDB1	8861	5	green	-0.624	-5.1	-8.25	2.83	19.1	4.61	11.1	3.86	-0.32	8.4	1.73	0.194	14.8	-1.88	3.96	-0.165	-1.3	-6.31	1.34	12.2	2.44	3.85	2.95	1.86	0.296	4.55	-2.43	1.85	2.24	3.12	2.97	3.8	-0.514	0.944	0.258	-0.75	0.0764	-3.41	-0.00883	4.06	-0.262	2.13	6.34
cg00547484	1	32219777	BAI2	576	4	yellow	-1.8	15.6	9.2	18.5	-2.25	6.85	-1.21	2.66	-6.13	-7.88	4.78	-7.46	7.57	0.601	1.42	14.7	2.3	2.01	-0.201	0.682	-0.144	3.74	-4.12	6.54	4.2	8.33	0.338	0.143	5.48	5.97	2.02	1.53	0.173	-0.728	-1.79	1.8	0.549	9.02	6.77	2.62	-1.02	-4.98	-1.02
cg00548098	16	11295667		NA	2	blue	-1.61	21.8	12.5	13.6	-9.84	3.89	-5.93	0.223	-6.59	-14.2	3.12	-8.66	1.06	-0.0408	-1.32	11.7	1	4.34	-0.839	-5.53	-1.38	3.01	-6.41	3.79	3.12	4.99	2.21	0.0354	1.9	3.89	2.08	0.12	-0.159	-0.446	-1.35	0.498	0.378	12.3	6.5	-0.911	-0.551	-5.52	-2.78
cg00548633	19	46094335	GPR4	2828	4	yellow	-1.32	15.8	8.93	17.8	-2.81	7.25	-1.7	2.05	-6.19	-8.14	4.81	-8.09	7.4	-0.13	1.52	13.2	2.63	2.07	-0.438	-0.32	-0.445	3.66	-4.48	5.53	5.2	7.02	0.883	0.332	4.88	6.45	2.27	1.27	1.77	1.6	-0.0666	0.637	0.943	9.33	8.5	2.15	0.632	-5.23	-1.04
cg00549398	17	78725201	RPTOR;RPTOR	57521	2	blue	-2.2	25.7	13.2	16.9	-10	4.12	-5.95	-0.635	-8.21	-16.6	3.91	-10.6	1.88	-1	-0.547	13	1.42	3.61	-1.63	-5.83	-2.1	3.43	-8.19	3.45	4.45	4.98	1.48	-0.918	2	4.75	2.34	0.0164	0.801	0.157	-1.86	-0.0621	0.738	14.1	9.07	-0.416	-0.922	-7.05	-3.87
cg00549972	6	170455374		NA	8	pink	7.68	1.16	0.282	2.84	5.86	-0.38	8.64	18.5	5.96	4.7	-4.59	2.17	6.15	2.72	2.99	2.9	4.63	3.92	13	5.12	12.4	-3.88	9.82	8.65	-3.76	3.54	3.18	5.77	4.21	-4.3	-1	6.64	0.28	1.28	0.993	1.22	-3.62	-5.67	-0.636	2.56	0.362	0.467	0.929
cg00550082	2	114735221		NA	5	green	2.88	-4.99	-9.31	1.81	17.5	1.97	12.6	3.64	2.17	8.35	-0.903	-0.00863	12.5	-3.03	4.15	-2.5	0.896	-4.53	3.34	8.32	3.82	0.78	2.78	1.95	0.104	1.17	-0.21	0.258	-0.723	1.7	2.59	2.19	-1.08	1.24	-0.306	0.958	-0.698	-5.3	-0.256	3.93	0.00198	3.17	3.8
cg00551609	2	74214662		NA	2	blue	1.29	21.1	11.5	14.2	-9.28	1.76	-4.29	0.414	-4.85	-13.9	0.741	-9.4	1.23	-1.03	-0.511	10.3	3.22	5.24	0.582	-6.56	0.705	0.0758	-5.92	4.01	2.9	2.82	2.97	-0.117	1.19	3.03	0.8	-1.49	0.727	-0.182	-2.12	-0.836	0.568	9.31	8.01	-1.04	-1.58	-6.58	-4.27
cg00553833	1	29447700	TMEM200B	399474	4	yellow	-1.01	19.7	11.7	15.7	-5.35	5.51	-2.58	2.18	-5.21	-9.82	4.77	-6.94	4.45	1.6	0.0248	14.2	1.54	4.61	0.855	-1.42	-0.792	4.85	-4.15	7.27	4.22	8.1	2.26	3.01	4.54	5.72	4.28	1.81	3.54	2.35	0.453	0.814	1.17	12.9	9.9	0.74	1.92	-4.89	-0.763
cg00554173	20	3149777	ProSAPiP1	NA	5	green	0.779	-7.05	-11.2	1.07	20.1	2.23	12.6	3.26	0.85	8.66	0.306	0.063	12.5	-3.63	3.36	-2.94	-1.79	-6.71	2.33	10	2.12	2.85	2.35	0.553	-0.619	1.81	-1.54	-0.528	-0.352	1.11	3.85	3.76	-0.509	1.19	1.14	-0.495	1.07	-4.45	0.317	2.98	0.445	2.17	5.1
cg00554421	7	1513368	INTS1	26173	5	green	1.41	-6.31	-9.52	0.941	21.4	3.36	13	3.89	2.57	10.7	2.05	1.85	13.2	-1.19	2.89	-1.6	-0.218	-4.6	3.35	12.3	1.84	3.51	3.95	4.77	0.738	4.07	-0.175	3.07	1.36	3.12	5.34	3.06	1.12	2.35	1.99	0.372	2.11	-4.72	0.543	3.03	2.38	4.44	6.51
cg00556100	1	110407766		NA	4	yellow	-3.1	14.2	7.32	17.5	-2.34	8.18	-2.23	0.518	-8.14	-8.53	5.91	-9.51	7.93	-1.29	0.81	11.8	0.0564	0.135	-1.89	-0.236	-1.97	5.4	-6.04	3.36	4.44	7.19	0.248	-1.01	3.42	7.35	3.23	1.4	0.222	-0.792	-1.69	2.31	0.714	10.7	8.04	1.69	-0.925	-5.79	-0.534
cg00556627	2	201187003	SPATS2L;SPATS2L;SPATS2L;SPATS2L	26010	3	brown	3.67	17.9	15.6	8.25	-11.7	0.883	-4.52	1.58	0.578	-9.37	-0.514	-3.06	-2.61	3.55	-0.985	10.9	3.94	11.6	2.99	-5.37	1.91	-0.605	-1.68	5.71	2.64	2.54	4.92	2.38	3.81	2.35	1.45	-1.18	1.32	0.686	-1.27	0.262	-0.496	8.13	4.4	-0.629	0.297	-3.67	-4.11
cg00557996	11	69945518	ANO1;ANO1	55107	5	green	3.06	-9.21	-8.76	-2.56	20	1.55	14.2	8.98	5.98	14.9	-1.15	5.77	9	1.23	2.87	-2.34	-0.903	-2.61	6.78	13.8	6.1	1.78	10	3.75	-2.77	3.1	0.0533	4.25	3.69	-1.29	3.43	6.96	1.88	2.95	3.25	0.435	-1.39	-7.05	-1.61	3.18	2.4	5.45	7.08
cg00559249	5	131831244		NA	10	purple	1.04	-15.3	-8.13	-9.04	14.8	1.8	8.16	2.47	7.7	22.8	0.203	11.5	4.19	4.69	2.46	-5.32	-0.671	-1.86	1.74	12.8	1.91	1.43	10.1	1.39	-0.955	1.42	-1.55	4.98	3.41	1.15	1.41	1.57	2.33	2.46	3.66	0.735	0.111	-9.49	-5.09	3.55	3.72	8.91	7.2
cg00559935	2	238990731	SCLY	51540	2	blue	-0.684	19.5	13	11.3	-9.82	3.03	-5.27	1.39	-4.58	-12.3	3.09	-6.13	-0.197	1.41	0.0331	11.7	1.78	5.82	0.567	-4.78	-0.796	2.16	-4.41	4.61	3.05	4.95	1.12	1.54	3.15	3.08	1.54	0.861	0.501	-0.492	-0.85	0.706	0.538	11.1	5.25	0.74	-0.341	-6.46	-4.24
cg00560689	1	2883706		NA	2	blue	-0.492	26.6	12.9	16.8	-9.13	3.29	-4.68	0.205	-6.6	-14.9	3.28	-10	2.34	-0.554	-0.305	12.8	3.91	4.47	-0.393	-5.53	-0.902	1.25	-6.89	6.12	4.54	4.94	2.26	0.617	1.9	4.42	1.14	-1.39	1.15	0.449	-1.67	0.744	1.43	10.8	9.22	-0.115	-0.678	-6.54	-4.12
cg00561287	1	150230177	CA14	23632	3	brown	0.594	14.1	21.9	5.04	-13.7	2.45	-7.49	1.24	0.656	-6.62	1.13	1.05	-4.69	8.44	-1.18	12.6	3.83	11.8	0.485	-3.11	0.87	-0.203	0.939	6.1	2.49	5.15	2.65	5.29	7.12	2.98	-1.43	-1.78	3.07	0.788	0.1	1.09	-0.313	7	2.85	-0.522	1.47	-2.49	-3.96
cg00561322	11	111606373	PPP2R1B	5519	3	brown	0.492	15.9	19.7	8.01	-11.1	3.79	-6.81	1.16	-0.739	-6.61	2.46	-0.631	-1.39	7.11	0.665	12.7	5.28	9.72	0.114	-3.44	0.397	0.131	-0.218	6.25	4.95	5.16	1.72	2.93	5.55	4.5	-0.885	-1.44	3.01	1.62	0.12	2.13	0.323	7.17	4.22	1.87	1.64	-2.52	-4.75
cg00561803	9	140265575	EXD3	54932	2	blue	0.398	27.3	12.6	18.3	-7.77	3.52	-3.45	1.01	-5.78	-13.9	2.74	-9.95	3.38	-0.519	0.0504	13.2	3.07	5.16	0.614	-4.93	-0.0684	2.26	-6.25	6.35	3.65	5.32	2.92	0.383	2.42	4.7	2.79	-0.576	1.15	0.0789	-1.31	0.55	0.569	11.4	9.6	0.397	-0.97	-6.88	-3.6
cg00561891	13	113745525	MCF2L;MCF2L	23263	5	green	3.45	-7.06	-14.1	0.994	21.4	-0.585	15.6	2.84	2.15	7.47	-0.791	-1.52	11.6	-6.37	2.99	-4.77	0.611	-6.64	4.18	7.31	2.41	0.533	1.03	1.48	0.165	-1.46	0.399	-1.53	-2.4	-0.163	4.61	2.87	-0.522	2.18	0.882	-0.766	1.03	-5.16	1.77	2.3	0.711	1.51	4.45
cg00562430	8	66475106		NA	4	yellow	-1.32	19.1	10.6	18.6	-4.52	6.27	-1.92	1.51	-6.13	-10.7	4.63	-8.77	5.56	-0.246	-0.0443	14.5	1.16	3.5	0.311	-1.3	-1.16	4.79	-5.71	4.81	5.01	7.03	2.03	0.575	4.58	6.13	3.99	2.06	1.79	0.82	-0.358	1.56	0.695	12.8	9.49	0.932	0.0892	-6.05	-0.412
cg00562598	17	8311594		NA	2	blue	-0.122	21.6	11.9	15.6	-6.08	4.97	-3.16	1.77	-4.57	-10.1	3.69	-6.95	4.18	1.75	0.761	13.1	2.29	5.36	0.72	-2.45	0.0671	3.16	-3.91	7.42	3.29	7.74	1.95	2.76	3.22	5.73	2.47	-0.192	1.84	0.825	-0.622	1.44	0.822	10.6	7.75	0.899	0.713	-4.56	-2.13
cg00563107	4	141173528		NA	5	green	3.52	-12	-9.12	-5.69	17.4	0.588	12.7	4.19	7.87	17.3	-1.41	7.85	6	1.98	2.79	-4.36	0.594	-1.66	4.48	12.4	3.99	0.42	8.78	2.8	-0.913	0.626	0.328	4.19	3.16	0.257	2.69	2.5	1.5	2.83	2.94	0.342	0.682	-8.46	-3.26	2.27	3.37	6.03	5.18
cg00563768	17	34174170	TAF15;TAF15	8148	38	plum1	-4.47	15	8.98	11.9	-7.78	5.62	-5.78	-3.04	-8.3	-12.4	6.58	-8.18	1.56	-0.845	-1.51	9.59	-4.74	1.96	-2.83	-4.2	-6.23	10.6	-9.01	1.37	3.59	5.59	1.2	-1.61	1.29	6.69	9.75	2.13	1.4	0.327	-0.257	0.442	1.09	21.2	8.24	-0.707	0.775	-5.17	-0.312
cg00563932	9	139871049	PTGDS	5730	2	blue	-1.18	23.8	16.3	12.5	-11.8	3.9	-6.64	0.236	-4.84	-13.3	3.44	-6.39	-0.276	2.14	-0.921	13.7	2.45	6.72	-0.541	-5.07	-1.27	2.25	-4.97	5.2	3.95	5.6	2.21	2.07	3.38	4.58	1.26	-0.735	1.41	-0.144	-0.898	0.617	1.07	11.8	6.68	-0.326	-0.164	-5.51	-4.32
cg00564212	19	41098516	LTBP4	8425	5	green	2.19	-6.15	-8.94	0.783	20.1	2.46	13.7	5.11	2.86	10.3	-0.311	2.2	12	-1.09	3.73	-1.54	-0.0688	-4.24	3.83	11.6	4.24	1.99	5.07	3.8	-1.31	3.23	-0.604	2.54	1.82	1.27	3.29	3.33	0.206	1.46	1.93	0.621	0.458	-5.59	-0.398	3.86	1.4	2.56	4.61
cg00565786	8	1012465		NA	5	green	2.15	-5.48	-8.51	1.72	20.1	3.22	13.4	5.07	2.53	9.94	0.789	1.52	13.2	-1.23	3.57	-0.845	1.25	-4.04	3.9	11.8	3.48	1.69	4.29	4.27	0.357	3.38	-0.15	2.66	2.38	2.13	2.99	3.13	0.179	1.85	1.25	0.945	0.637	-5.26	-0.354	5.05	1.02	4.82	6.45
cg00566320	1	32172204		NA	2	blue	-0.562	23	11.3	15.9	-9.07	2.82	-5.23	0.18	-6.84	-15.5	2.11	-10.5	2.01	-1.38	-0.757	11	2.35	3.9	-0.591	-6.36	-0.411	0.817	-7.14	3.8	2.62	4.01	2.04	-1.14	0.721	3.44	0.238	-1.35	-0.363	-1.34	-2.93	0.591	-0.0621	10.3	7.35	-0.911	-2.05	-6.87	-4.94
cg00566961	5	119488431		NA	2	blue	2.62	21.8	10.3	13.4	-9.17	0.387	-3.14	1.04	-3.66	-15	0.124	-9.73	0.555	-2	-0.607	9.06	3.14	6.56	2.47	-7.55	0.902	-0.322	-6.32	3.95	2.66	1.76	4.15	-0.971	-0.109	1.91	1.87	-0.571	-0.722	-0.942	-2.86	-0.0773	0.363	9.35	6.69	-1.55	-2.17	-5.97	-5.28
cg00568910	1	43429380		NA	2	blue	-1.56	21.8	13.7	12.6	-11.1	3.47	-7.23	0.0829	-5.89	-13.8	2.71	-7.44	0.0316	0.976	-2.11	11.1	0.505	5.5	-0.821	-6.34	-1.1	2.95	-5.6	3.07	2.48	4.61	2.83	0.357	1.44	3.62	1.8	0.214	0.305	-1.17	-2.69	0.00087	0.154	13.4	6.74	-1.68	-1.89	-5.82	-4.45
cg00569813	8	8483549		NA	2	blue	-4.54	14.6	17.2	10.4	-8.41	8.3	-7.03	0.228	-5.2	-7.62	6.43	-2.79	1.2	5.42	-0.605	16.8	1.61	5.06	-3.16	0.148	-2.63	4.5	-2.85	5.03	5.11	9.23	-0.182	3.21	7.96	7.15	0.434	0.11	2.51	0.677	-0.241	0.865	1.31	10.5	4.73	1.47	1.26	-3.32	-0.667
cg00570000	1	118728226	SPAG17	200162	3	brown	-1.56	10	19.5	4.48	-8.42	6.45	-6.25	1.22	0.683	-2.18	3.99	3.92	-1.72	12.4	-0.271	14.3	3.21	10.4	-1.26	2	-0.254	2.56	2.89	7.44	3.58	9.3	1.06	7.41	11.6	6.25	-0.879	-1.58	4.65	1.77	1.44	1.53	0.66	6.28	1.89	1.31	2.85	-0.211	-1.79
cg00571033	8	9760957	MIR124-1;LOC157627	406907	10	purple	6.58	-9.82	-5.27	-5.96	13.1	0.645	12.3	4.97	12.2	18.6	-1.77	10.5	4.49	4.9	2.99	-2.18	4.87	2.33	6.37	12.3	5.32	-1.58	11.5	6.74	1.61	0.684	2.25	7.27	5.65	1.61	2.32	0.746	3.61	5.02	4.22	0.12	0.925	-10.1	-3.05	3.76	4.4	7.99	5.53
cg00571101	12	12435302		NA	2	blue	1.54	23.3	12.3	14.9	-7.06	3.37	-2.57	2.55	-3.41	-10.8	2.37	-7.31	2.9	0.967	-0.642	12.6	2.47	7.33	2.53	-3.74	0.661	2.41	-4.12	6.5	2.97	5.58	4.23	1.88	2.92	4.06	3.48	0.785	0.48	-0.503	-2.09	0.962	-0.156	11.2	7.44	-0.402	-1.33	-5.46	-3.57
cg00571354	7	150666767	KCNH2;KCNH2	3757	5	green	2.28	-2.35	-6.21	4.57	17.7	3.68	12.4	5.85	1.5	7.82	1.56	-0.251	16.2	-1.16	3.02	1.33	1.74	-3.44	4.22	11.1	3.57	2.29	3.5	5.97	1.55	4.64	0.719	2.78	2.26	2.8	3.93	3.93	0.537	1.66	1.13	-0.96	0.511	-3.09	1.96	3.27	1.04	2.1	5.4
cg00571466	2	219437332	RQCD1	9125	8	pink	9.11	2.51	1.89	2.66	4.94	-0.864	8.86	18.1	8.1	4.68	-4.57	3.4	5.23	4.31	1.94	3.43	2.68	7	15.8	5.07	12.4	-1.24	11	9.6	-3.98	4.26	5.56	7.13	4.55	-3.69	3.05	8.66	2.04	2.28	1.71	0.699	-3.66	-1.96	1.04	1.14	2.14	1.06	2.19
cg00571483	1	59046173		NA	3	brown	-2.25	18.5	18.7	9.57	-13.2	5	-9.39	-0.505	-4.23	-10.4	4.31	-3.62	-1.43	4.75	-1.13	12.8	3.05	7.09	-2.26	-4.71	-2.09	1.85	-3.49	4.34	4.83	5.95	1.62	1.93	4.08	5.33	-0.755	-1.58	2.12	0.348	-0.66	1.16	1.16	10	4.84	0.638	0.39	-3.26	-3.6
cg00572323	16	29706151	QPRT	23475	3	brown	-0.963	21.2	20.9	11.6	-10.5	5.52	-6.39	0.922	-2.88	-8.87	4.53	-2.99	0.293	5.9	-0.249	16.9	3.35	8.5	-0.29	-2.34	-1.09	3.1	-2.18	7.37	5.25	7.95	2.43	3.59	6.61	6.33	1.6	-0.445	3.14	1.49	-0.0749	1.84	0.9	11.6	6.13	0.658	1.35	-3.85	-3.61
cg00573352	10	35754300	CCNY;CCNY	219771	4	yellow	0.606	16.3	7.54	18	-1.42	5.38	0.544	2.37	-4.4	-7.52	3.87	-8.56	8.23	-0.735	1.12	11.8	1.87	3.55	1.84	-0.0167	0.291	4.24	-4.25	6.93	4.57	6.79	2.74	0.888	3.59	6.35	5.04	1.62	1.84	0.796	-0.188	0.113	2.29	9.97	10.4	1.14	0.563	-3.32	0.236
cg00574251	2	164965991		NA	8	pink	4.87	3.18	2.76	4.07	4.53	2.03	5.89	17.8	4.17	3.98	-1.66	2.69	6.41	4.75	2.7	5.16	2.49	4.37	11.1	5.7	9.47	-0.048	9.68	9.1	-2.66	6.94	2.4	6.71	5.38	-2.19	1.29	9.24	2.6	3.14	2.5	2.56	-3.32	-1.57	1.55	2.03	2.72	0.614	1.49
cg00574328	19	56851220		NA	7	black	4.23	-5.74	-10.6	1.48	19.5	0.557	16.4	4.97	3.49	8.09	-0.624	-0.286	11.8	-3.95	2.44	-2.56	0.28	-4.26	5.84	8.78	3.61	1.41	2.86	3.13	-0.571	0.87	1.8	0.9	-0.0369	0.359	5.44	3.79	-0.233	1.68	1.76	0.433	-0.301	-5.14	0.776	2.32	0.731	2.27	5.68
cg00575135	16	2174255	PKD1;PKD1	5310	10	purple	1.51	-7.29	-2.11	-3.27	12.9	5.32	7.77	4.45	7.3	19.5	2.51	10.9	8	7.98	3.83	1.37	2.55	1.19	2.49	17.7	2.67	2.09	11.1	6.19	2.72	5.78	-1.14	7.14	8.73	4.69	1.42	1.82	2.51	2.31	3.62	1.71	0.612	-6.5	-3.69	5.2	4.23	7.81	5.83
cg00575903	16	1439060		NA	8	pink	9.4	0.805	-0.711	0.66	4.46	-3.46	8.58	19.2	7.47	3.69	-8.26	2.82	2.83	2.08	0.726	0.194	0.878	5.03	17.2	2.69	15	-2.71	10.6	6.42	-8.4	1.63	5.67	4.97	1.6	-7.8	1.99	9.66	-0.113	0.526	0.688	1.44	-7.04	-2.9	-0.735	-0.756	-0.0424	0.0962	0.274
cg00577865	5	81075060		NA	3	brown	-1.09	13.7	25.4	4.98	-13.6	4.29	-8.53	0.737	0.202	-5.59	3.14	1.92	-4.31	9.95	-0.705	13.9	3.01	11.4	-0.552	-1.9	-0.709	1.81	1.14	5.58	4.31	6.55	1.64	5.85	8.42	4.7	-0.253	-0.805	3.89	1.57	0.635	1.18	0.409	8.23	2.7	0.59	2.56	-1.25	-2.24
cg00578304	7	2968627	CARD11	84433	3	brown	1.74	20.5	18.2	11	-9.69	3.23	-4.53	1.73	-1.05	-8.53	2.04	-3.1	0.0462	4.99	0.693	14.5	6.33	9.9	1.42	-3.2	0.945	-0.283	-1.55	8.74	4.97	5.66	2.78	3.29	5.66	4.5	-0.262	-1.79	2.37	1.38	-0.775	1.76	1.04	8.1	5.54	0.983	0.749	-4.19	-4.96
cg00578511	5	758260		NA	4	yellow	-1.65	17	8.89	17.4	-3.7	5.77	-2.43	0.868	-7	-9.4	4.64	-9.1	6.41	-0.614	0.459	12.6	2.02	1.8	-0.962	-1.32	-1.16	3.62	-5.56	5.34	4.2	6.79	1	-0.177	3.72	5.81	2.4	0.302	0.687	-0.623	-1.6	-0.0477	1.46	10.3	8.96	1.28	-1.41	-5.36	-1.92
cg00579105	6	31704587	CLIC1	1192	3	brown	-3.53	10.6	21.6	4.46	-10.6	7.08	-8.74	-0.443	-0.993	-3.6	5.8	3.3	-2.84	11.8	-0.877	14.5	1.63	9.07	-2.9	0.933	-2.63	3.9	1.28	5.49	4.47	9.27	-0.065	6.34	10.6	6.9	-0.393	-1.27	5.08	1.76	2.35	1.71	0.713	8.38	2.64	1.68	3.79	-0.279	-1.04
cg00581617	1	25557633	SYF2;SYF2	25949	2	blue	-0.0489	22.7	11.7	14	-8.75	2.89	-4.41	0.634	-5.18	-13.3	2.32	-8.42	1.6	-0.0566	-0.473	10.9	1.41	5.48	0.516	-5.55	-0.477	2.86	-5.78	4.72	2.61	4.83	2.83	0.469	1.25	3.68	3.22	0.149	0.954	-0.35	-1.2	0.119	1.1	12.5	8.08	-0.69	-0.535	-5.2	-3.06
cg00581764	6	158183853		NA	4	yellow	-1.01	18.3	9.16	17.6	-3.89	5.14	-2.17	2.56	-6.47	-9.91	3.75	-9.23	6.31	-0.491	0.499	12.4	1.76	2.29	0.358	-1.52	0.27	3.11	-4.55	6.01	2.88	7.31	1.38	1.11	3.34	4.8	1.94	1.03	0.0828	-0.824	-1.33	1.47	1.61	9.17	7.83	0.468	-1.02	-5.65	-1.74
cg00582579	8	135533786	ZFAT;ZFAT	57623	2	blue	-1.2	22.9	13.9	16.3	-8.29	5.07	-4.82	-0.0868	-6.13	-12.2	4.19	-8.32	2.92	0.762	-0.373	13.8	2.1	4.74	-0.85	-4.19	-1.8	3.48	-6.01	4.52	5.23	5.69	2.14	-0.0541	3.44	5.89	2.7	0.0628	0.948	0.0884	-1.64	0.262	1.62	13.2	8.51	0.905	-0.856	-6.03	-2.19
cg00584174	11	63257403	HRASLS5;HRASLS5;HRASLS5	117245	2	blue	3.1	18.1	12.2	11.4	-8.78	1.46	-3.46	2.01	-1.97	-10.6	-1.19	-6.04	0.494	1.1	-0.526	10.2	3.23	7.27	2.29	-5.24	2.98	-0.547	-3.02	4.49	1.71	2.95	4.12	0.966	2.36	2.29	0.579	-0.785	0.816	-0.103	-1.2	0.454	-0.734	7.7	6.2	-0.983	-0.896	-4.64	-4.09
cg00584594	16	84951560		NA	5	green	0.0969	-2.03	-7.59	6.2	17.5	3.76	11.1	4.62	-1.6	5.13	2.12	-3	17.1	-3.96	3.36	1.1	-1.36	-6.25	2.71	9.34	2.26	4.63	1.03	3.89	-0.236	4.6	-0.644	0.0954	1.01	2.4	5.48	4.81	-0.355	1.12	-0.188	-0.794	0.436	-0.704	3.16	2.88	0.066	-0.634	4.03
cg00585174	10	134499472	INPP5A	3632	2	blue	-1.45	18.3	10.7	13.2	-8.67	3	-5.32	-1.17	-6.53	-13.2	2.67	-8.89	1.6	-0.787	-0.575	9.82	2.09	3.35	-1.87	-5.75	-1.46	1.32	-7.11	2.91	3.29	3.71	1.47	-1.09	0.882	4.06	0.326	-2.01	-0.778	-1.6	-3.13	-0.292	1.44	9.59	6.18	-0.461	-2.55	-5.7	-4
cg00585207	3	10452954	ATP2B2;ATP2B2	491	7	black	5.73	-6.3	-7.68	-0.348	18.1	0.1	16.6	9.39	6.44	11.1	-3.26	3.3	9.61	-0.206	3.42	-1.67	1.98	-1.22	8.43	10.7	8.08	-1.02	8.14	4.55	-2.32	1.56	1.53	3.25	2.59	-1.8	2.25	5.15	-0.832	0.993	0.319	1.16	-1.13	-7.51	-1.78	3.38	0.141	2.55	4.53
cg00585213	2	236760254	AGAP1;AGAP1	116987	2	blue	-1.19	18.6	8.84	14.7	-5.65	4.02	-3.68	1.72	-6.5	-10.9	3.53	-8.91	4.28	-0.841	1.52	9.78	1.23	2.8	0.105	-3.89	-0.393	2.82	-5.17	4.52	2.59	5.73	0.227	-0.0632	0.523	3.77	1.88	0.909	-0.0428	-0.796	-1.85	2.41	0.0133	9.98	6.68	1.31	-0.997	-5.87	-3.37
cg00585776	16	30790892	ZNF629	23361	5	green	2.71	-4.53	-8.68	2.61	17.2	0.845	13.8	5.88	1.48	6.7	-2.56	-0.632	12.2	-3.08	3.43	-1.23	-0.225	-4.76	4.33	9.01	6.23	1.05	3.74	2.09	-2.33	2.03	-0.366	0.217	0.962	-0.404	2.39	4.23	-0.621	0.953	1.45	0.11	-1.42	-4.39	1.15	2.8	0.532	1.46	5.16
cg00587115	7	47621025		NA	2	blue	-1.96	19.2	12.7	15.7	-6.7	5.64	-4.23	0.585	-6.2	-10.1	4.39	-7.32	3.97	1.46	-0.109	14.1	1.75	3.94	-1.15	-2.4	-1.36	3.62	-4.84	5.08	4.2	6.7	1.76	1.16	4.54	5.82	2.21	-0.127	1.51	0.215	-1.54	0.283	0.774	11.2	7.99	0.844	-0.981	-5.71	-2.18
cg00588430	11	117400424	DSCAML1	57453	2	blue	-2.31	19.8	12.5	15.1	-7.18	5.04	-5	1.81	-6.82	-11	3.76	-7.64	3.31	1.14	-0.292	13	1.3	3.35	-0.787	-3.19	-0.438	3.25	-4.54	4.55	2.73	7.16	1.27	0.871	3.33	4.15	1.1	1.13	-0.13	-1.24	-2.44	1.59	-1.15	11	6.12	0.922	-1.9	-5.97	-2.34
cg00588559	19	1014481	C19orf6;C19orf6	NA	8	pink	2.33	3.55	2.47	3.85	2.82	1.63	3.49	17.8	1.64	1.43	-1.94	1.29	4.65	3.24	1.18	4.18	-2.37	2.89	9.91	3.88	8.6	2.48	7.82	5.23	-6.2	6.9	1.57	4.38	3.72	-4.4	2.47	13.4	0.812	0.593	1.08	2.99	-5.24	1.49	1.07	0.817	0.947	-0.24	1.86
cg00589251	3	132036382	ACPP;ACPP	55	3	brown	-2.68	11.7	22.1	3.98	-12.6	5.78	-9.46	-0.596	-0.405	-4.8	4.44	2.66	-4.4	10.8	-1.05	12.8	1.69	10.4	-2.32	-1.01	-2.05	3.05	0.811	4.38	3.92	7.49	0.755	6.05	8.75	5.98	-0.653	-1.38	3.58	0.715	0.272	1.17	0.27	8.62	1.39	0.61	2.01	-1.11	-2.51
cg00589488	3	49760249	GMPPB;GMPPB	29925	5	green	-0.516	-5.54	-8.77	2.45	20.3	5.06	10.7	3.36	0.27	9.85	2.6	0.839	15.6	-1.54	4.3	-0.664	-1.11	-6.04	1.29	12.2	1.43	4.44	3.03	3.16	0.596	5.11	-2.06	1.48	1.22	3.84	4.08	3.17	1.37	2.55	2.09	0.621	1.27	-3.88	1.28	4.95	1.42	3.88	6.46
cg00592007	16	1226235	CACNA1H;CACNA1H	8912	2	blue	-1.75	14.7	18.8	8.94	-8.05	6.82	-5.65	1.27	-1.62	-5.21	4.93	-0.219	0.598	8.36	-0.105	16.3	3.02	8.54	-1.05	0.807	-0.849	3.62	0.136	7.9	4.89	9.73	1.42	6.08	9.21	7.09	1.05	-0.61	3.2	0.958	-0.125	1.57	1.14	9.01	3.51	1.46	2.09	-2.59	-1.34
cg00593008	5	75465603	SV2C	22987	2	blue	-4.97	19.5	19	12.3	-10.8	7.52	-8.5	-1.22	-6.47	-10.5	6.84	-4.53	0.746	4.57	-1.62	16.8	0.158	5.35	-3.8	-2.33	-4.1	5.9	-4.77	3.88	4.95	8.68	0.979	1.57	6.31	7.42	2.09	-0.135	2.28	-0.044	-0.638	0.759	0.624	15.1	6.13	0.377	0.184	-4.33	-2.11
cg00593111	16	88958311	CBFA2T3;CBFA2T3	863	3	brown	-3.96	13.8	19.8	8.03	-9.68	7.65	-8.41	-0.366	-3.23	-5.92	6.37	-0.124	-0.416	8.72	-1.53	16	1.35	7.36	-3.09	0.0291	-3.09	4.78	-0.788	6.05	4.82	10.2	0.83	4.7	8.93	7.49	0.584	-0.956	3.61	0.64	0.771	1.53	2.33	10.7	4.28	0.279	2.03	-1.62	-1.06
cg00593243	5	172196153	DUSP1	1843	5	green	1.33	-10.4	-8.1	-3.71	17.2	2	11.1	4.2	5.16	15.3	-0.0326	6.39	7.86	1.79	2.74	-2.5	-0.242	-3.42	2.71	13.8	3.42	1.51	8.35	2.72	-1.47	2.82	-1.21	3.94	3.8	0.837	1.57	2.75	2.39	2.76	3.66	0.874	-0.318	-7.57	-1.55	2.43	3.15	4.22	5.98
cg00595472	11	61525251	DKFZP434K028;C11orf9;C11orf9	26070	2	blue	-1.24	23.5	13.3	14.4	-11.2	2.97	-6.69	0.0715	-6.79	-16.3	2.16	-9.46	0.484	-0.582	-0.827	11.6	1.7	4.27	-1.04	-6.7	-0.651	1.34	-6.85	2.83	2.68	4.1	1.56	-0.941	1.11	3.21	0.109	-0.522	0.119	-0.791	-1.93	0.355	0.0994	11.5	7.25	-0.774	-1.52	-6.95	-4.99
cg00597931	8	142179697	DENND3	22898	2	blue	-1.05	23.2	10.8	17.1	-7.72	3.39	-4.12	1.75	-7.27	-15	2.61	-10.8	3.05	-1.58	-0.817	11.6	-0.228	3.4	0.609	-5.16	-0.291	3.56	-6.61	3.47	1.41	5.42	2.45	-1.08	1.25	2.87	3.13	1.85	0.119	-1.07	-2.14	0.694	-0.462	13.3	8.6	-0.853	-1.97	-7.77	-2.84
cg00598021	4	10113794	WDR1;WDR1	9948	2	blue	1.43	17.1	12.5	10.8	-8.41	2.52	-3.75	1.24	-2.5	-9.62	0.304	-5.16	0.732	2.07	-1.02	10.8	1.89	7.09	1.31	-4.17	1.63	0.832	-3.04	4.09	2.08	3.9	3.88	1.22	3.15	3.43	0.92	-0.471	1.29	-0.697	-1.23	0.158	-0.878	9.08	5.81	-0.946	-1.25	-4.41	-4.07
cg00598553	16	49918219		NA	21	darkred	13	-2.47	-2.33	-2.61	4.62	-7.33	9.66	9.67	10.7	5.4	-13.8	3.8	0.819	1.1	1.69	-2.63	5.41	5.11	12	1.85	17.4	-9.18	9.85	4.24	-5.63	-3.2	4.72	3.81	0.491	-7.44	-3.18	1.47	-0.903	-0.0526	-0.0402	-1.97	-3.09	-9.13	-2.43	-0.495	-1.07	1.44	-0.574
cg00599266	4	55967	ZNF595;ZNF718	NA	22	darkgreen	-9.77	-0.951	-2	3.41	5.62	10.4	-0.556	-2.05	-6.34	2.32	10.1	-0.367	7.72	0.639	0.0311	2.49	-11.2	-6.13	-5.41	7.11	-7.21	18.7	-2.12	-1.51	1.1	8.95	-3.8	-0.0686	1.95	8.11	10	5.16	2.3	1.52	1.74	0.315	1.59	7.58	2.65	2.11	2.19	0.417	5.82
cg00600454	1	65468017		NA	5	green	0.637	-8.22	-8.04	-1.1	19.4	3.79	11.6	3.73	3.35	13.2	1.64	4.34	10.9	0.99	3.4	-1.09	0.34	-3.86	2	14.6	2.4	2.36	5.96	3.67	0.274	4.09	-1.65	3.38	3.95	2.84	2.19	2.09	1.3	2.3	1.92	0.608	1.74	-6.55	-1.64	3.75	2.28	5.53	5.81
cg00601042	12	132900274	GALNT9	50614	5	green	3.49	-16.2	-11.1	-9.5	14.7	-1.8	11.1	2.29	8.35	17.6	-2.21	8.94	2.6	1.05	2.3	-7.34	0.84	-2.55	3.64	9.72	3.01	-1.23	8.19	0.55	-0.835	-2.37	-0.265	3.18	0.873	-1.54	1.43	1.82	0.963	2.74	2.21	-0.315	0.583	-10.2	-4.48	2.48	2	7.67	5.42
cg00603097	18	72125359	FAM69C	125704	4	yellow	-2.78	15.7	9.1	17.7	-3.68	6.46	-2.59	0.336	-7.64	-9.53	5.36	-8.93	6.37	-0.731	1.12	13.9	2.17	0.792	-2.13	-0.73	-1.92	3.53	-6.01	4.21	5.28	6.76	-0.306	-0.897	4.87	6.28	1.23	0.106	-0.256	-0.539	-2.56	-0.342	1.81	9.59	6.84	2.04	-2.14	-6.07	-0.925
cg00604771	16	32213944		NA	51	thistle1	0.359	1.37	0.524	2.07	-0.28	0.436	0.14	0.6	-0.67	-1.19	-0.34	-1.41	0.805	-0.904	2.86	1.08	1.64	-0.185	0.198	-0.674	0.857	-0.157	-0.43	0.71	0.766	0.135	-1.24	-0.138	-0.159	0.297	-0.283	0.292	3.72	5.2	0.452	1.41	-4.27	0.971	3.8	3.14	-0.153	-3.36	-0.842
cg00604840	5	154230173	C5orf4;C5orf4	NA	3	brown	-3.37	10.5	19.9	4.54	-11.7	5.54	-9.53	-0.686	-1.71	-4.78	4.19	1.75	-3.27	9.36	-0.462	12.8	2.55	8.01	-3.44	-0.886	-1.72	1.76	0.476	4.02	3.41	7.09	-0.628	4.12	8.42	5.27	-2.63	-2.4	2.48	0.178	-0.561	1.43	0.157	6.77	1.25	1.05	1.19	-0.915	-2.92
cg00608540	5	180627973	TRIM7;TRIM7;TRIM7;TRIM7;TRIM7	81786	2	blue	-2.01	17.5	14.3	12.1	-7.48	5.73	-5.02	1.08	-4.77	-8.87	4.01	-4.43	1.97	3.81	-0.287	14.8	0.231	5.45	-0.872	-1.25	-0.982	5.09	-3.05	5.2	2.97	8.4	1.38	2.76	6.65	5.42	2.61	1.2	2.21	0.585	-0.307	1.27	-0.592	13.3	6.48	0.906	0.933	-5	-1.13
cg00609473	14	23351842	REM2	161253	3	brown	-0.458	10.5	17.9	4.05	-8.84	5.09	-6.2	1.52	1.47	-2.24	2.95	3.34	-2.08	10.7	-0.117	11.7	3.51	10.8	-0.134	0.432	0.296	1.71	3.04	6.61	3.99	7.32	1.77	6.94	8.66	5.61	-0.563	-1.14	3.81	1.81	0.768	1.15	0.893	5.75	1.34	0.879	2.22	0.658	-2.46
cg00610508	16	4013337	ADCY9	115	2	blue	-2.18	20.2	11.7	12.9	-11.4	2.06	-6.69	-1.38	-7.84	-17	3.53	-9.98	-0.536	-1.74	-1.36	10.4	0.587	3.22	-1.64	-7.45	-3.12	2.92	-8.46	1.87	3.67	2.86	1.39	-1.84	1.04	2.65	2.5	0.466	-0.397	-1.01	-2.15	0.562	0.398	14.5	7.4	-1.39	-1.58	-8.7	-4.48
cg00610692	2	74668072	RTKN;RTKN;RTKN	6242	3	brown	-0.57	17.8	21.9	7.89	-13.7	3.93	-8.33	0.617	-1.63	-8.59	2.6	-1.26	-2.58	6.88	-0.0486	13.7	4.05	9.75	-0.685	-3.98	-0.178	1.12	-1.01	6.37	3.79	6.09	1.59	4.08	5.44	4.46	-0.494	-1.73	2.76	1.53	-0.397	1.26	0.919	8.8	4.25	0.869	1.54	-2.74	-4.06
cg00611495	16	1120275	LOC146336	NA	3	brown	0.676	12.4	24	3.31	-12.4	3.49	-7.32	0.942	2.36	-3.98	2.12	3.75	-4.84	12	-1.01	12.8	4.82	14.1	0.422	-1.24	0.413	0.315	2.59	7.91	3.68	6.55	2.79	8.05	9.35	4.65	-1.11	-2.44	4.76	1.81	0.994	1.27	0.139	6.07	2.01	0.238	2.72	0.688	-3.34
cg00611614	8	145019630	PLEC1;PLEC1;PLEC1;MIR661;PLEC1;PLEC1	NA	5	green	2.73	-10.4	-6.46	-4.98	17.4	2.35	12.1	6.09	8.29	19.6	0.0144	9.92	6.81	4.57	4.2	-1.46	1.02	-0.675	4.78	16.6	4.3	1.12	11.5	4.89	-0.311	3.49	-1.1	6.31	6.15	1.08	2.09	3.74	2.32	2.94	3.55	0.619	-0.754	-8.02	-3.89	4.77	4.03	5.8	6.53
cg00612625	10	100991745	HPSE2;HPSE2;HPSE2;HPSE2	60495	3	brown	0.747	8.36	17.3	1.84	-8.32	4.38	-5.15	2.17	3.44	-0.38	2.75	6.09	-3.12	13.6	0.257	10.8	5.07	12.6	1.01	1.33	0.921	0.624	4.91	8.73	3.79	7.19	2.13	9.79	10	5.09	-0.963	-1.72	5.22	3.21	2.5	0.995	0.578	3.62	0.837	1.3	4.19	2.74	-1.28
cg00614413	19	5286594	PTPRS;PTPRS;PTPRS;PTPRS	5802	8	pink	2.3	2.12	1.79	3.69	4.19	2.45	4.04	19.9	1.59	3.26	-1.13	1.54	6.03	3.33	2.32	4.27	0.682	1.67	9.55	4.96	8.56	-0.0269	8.69	6.51	-4.49	6.32	0.595	4.98	4.56	-4.42	-0.515	11.4	-0.121	0.445	0.0277	2.22	-5.82	-1.63	-0.699	1.98	-0.168	-0.44	1.04
cg00614503	10	11117464	CUGBP2;CUGBP2	NA	7	black	3.71	-6.71	-12.2	0.588	17.5	-0.587	14.8	4.22	2.69	7.51	-1.2	-0.675	10.1	-4.88	2.24	-3.98	-1.09	-5.33	5.24	7.52	3.03	0.726	2.03	0.965	-1.7	-0.607	1.09	-0.788	-1.01	-0.986	4.38	3.54	-0.987	0.533	0.97	-1.11	0.508	-5.44	0.433	2.03	0.274	2.15	6.34
cg00614959	4	720870	PCGF3	10336	5	green	3.44	-9.47	-15.2	-1.73	18.4	-2.44	13.1	3.11	2.37	8.71	-2.57	-0.152	8.45	-6.07	2.28	-7.27	-0.339	-7.26	3.97	5.75	3.47	-0.628	2.49	-0.383	-1.95	-3.02	-0.0511	-2.27	-3.59	-2.8	2.71	3.38	-1.1	1.19	1.68	-0.419	-1	-6.73	0.061	1.45	0.455	1.57	3.79
cg00615941	3	45293922		NA	2	blue	0.56	22.3	10.2	16	-7.4	2.65	-2.98	0.764	-5.49	-13.9	1.79	-10.3	2.94	-1.66	-0.253	10.7	1.64	4.74	0.884	-5.41	-0.0356	2.41	-6.78	3.85	2.95	4.11	3.19	-1.07	0.984	3.62	3.15	0.229	-0.608	-0.933	-2.52	0.0107	0.939	11.7	8.06	-0.4	-2.29	-6.64	-3.55
cg00617064	2	27272375		NA	5	green	0.801	-5.15	-9.14	2.91	19.3	3.03	12.2	2.98	0.3	7.99	1.07	-0.796	14	-3.33	3.33	-0.935	-0.386	-5.86	2	10.5	2.1	2.78	1.71	1.47	0.944	2.28	-0.452	0.0194	1.61	2.36	3.73	3.18	-0.898	0.839	-0.441	-0.721	-1.3	-3.09	1.27	3.91	-0.765	1.65	6.53
cg00618596	16	71088536	HYDIN;HYDIN	54768	2	blue	1	17.9	13.4	10.4	-7.98	3.75	-3.5	1.22	-1.83	-8.71	2.39	-4	0.819	3.33	-0.257	11.5	1.71	8.83	1.71	-3.12	-0.137	3.12	-2.95	5.84	3.19	5.33	3.61	2.87	4.23	4.71	4.04	0.288	1.03	-0.0405	-1.31	0.899	0.924	10.8	5.6	1.04	0.0434	-3.1	-2.24
cg00618626	17	39807901		NA	2	blue	-0.956	21.2	13	12.3	-12.1	1.54	-6.57	0.161	-6.17	-16.7	1.91	-8.92	-1.09	-0.686	-1.1	11	2.4	4.68	-0.454	-7.21	-0.941	0.302	-6.78	3.12	2.55	3.06	1.61	-1.01	1.45	1.68	-0.286	-0.375	0.439	-0.588	-1.86	0.246	0.15	11	7.43	-1.6	-1.02	-6.73	-5.47
cg00619345	2	98278404	ACTR1B	10120	5	green	0.377	-6.69	-10.7	1.5	21.5	3.05	12.1	3.97	0.229	9.38	1.36	0.338	14.1	-2.73	2.88	-2.29	-1.07	-7.14	2.04	10.9	2.27	2.74	3.12	2.43	-0.707	3.09	-1.18	0.81	0.521	1.86	3.06	3.31	0.106	1.47	1.69	0.236	0.553	-5.06	0.521	3.73	1.36	3.48	6.98
cg00619561	13	112980676		NA	5	green	1.13	-14.5	-13.6	-6.07	19.2	-0.153	11.7	2.83	4.41	14.5	-0.233	5.59	6.09	-1.06	2.93	-6.91	-1.58	-5.69	2.75	10.7	1.64	1.19	5.6	0.0367	-1.54	-0.314	-2.03	1.18	0.306	-1.01	2.5	3.53	0.79	2.11	2.96	0.2	0.0109	-8.12	-2.85	2.76	2.57	5.12	6.31
cg00621258	20	60781288		NA	2	blue	-0.627	22.2	14.6	13.8	-8.59	4.38	-4.77	1.12	-4.41	-10.9	4.01	-6.09	1.8	2.46	-0.754	14.2	2.84	6.26	0.249	-3.34	-0.918	3.02	-3.96	7.56	4.43	6.66	2.99	2.66	4.07	5.19	2.63	-0.148	1.64	0.133	-0.883	1.24	0.233	12.1	7.06	-0.0336	0.0328	-5.7	-3.62
cg00621646	11	123849141	OR10S1	219873	3	brown	1.96	17.1	16.2	9.19	-9.17	3.55	-4.3	0.84	-0.216	-7.26	1.67	-2.34	-0.0709	5.17	0.539	12.6	3.73	10.7	1.28	-2.75	0.9	1.34	-1.25	6.34	4.12	5.51	3.1	3.77	5.52	5.51	1.57	-1.75	1.8	0.566	-1.22	0.455	0.893	8.4	4.14	0.551	0.57	-0.341	-2.93
cg00621899	7	100486423	UFSP1;UFSP1	402682	5	green	-0.358	-7.43	-10.4	0.867	20.7	3	11.7	3.82	0.467	9.11	1.81	0.575	12.3	-2.62	2.95	-2.17	-1.6	-7.04	1.84	11.5	1.7	3.2	3.12	1.35	-0.466	3.04	-1.94	0.549	1.2	1.33	3.28	4.24	-0.404	1.37	1.25	0.0387	1.19	-4.71	-0.151	3.28	0.623	2.94	6.29
cg00624037	12	89315201		NA	2	blue	-1.36	25.2	14.5	14.8	-10.5	4.07	-5.9	-0.128	-6.21	-14.9	3.49	-8.42	1.08	0.644	-0.933	13	1.29	5.6	-0.772	-5.61	-1.73	3.18	-6.6	3.99	3.58	5.35	2.4	0.18	2.54	4.79	2.3	-0.282	0.724	-0.366	-1.53	0.844	1.09	13.2	7.52	-0.462	-0.979	-5.5	-3.62
cg00624212	3	47020760	NBEAL2	23218	10	purple	0.106	-11.3	-5.75	-5.76	13.7	4.07	7.25	2.77	5.78	19.6	1.85	9.82	6.45	5.2	3.06	-2.33	0.129	-1.96	0.889	14.7	1.61	2.08	9.28	2.32	0.694	3.3	-1.92	5.03	5.18	2.95	0.982	1.66	2.15	2.37	2.64	0.0851	-0.222	-7.54	-3.8	3.92	2.97	8.3	6.64
cg00624410	16	57127968	CPNE2	221184	2	blue	-3.52	21.8	13.2	16.8	-8.43	5.34	-5.52	0.151	-8.51	-14.1	5.37	-9.27	2.68	-0.236	-0.0489	14.5	0.236	2.86	-1.68	-3.83	-2.89	4.86	-7.32	2.95	4.42	6.13	0.174	-1.07	3.71	4.85	2.91	1.88	0.679	-0.309	-1.05	0.392	0.739	15.2	8.51	0.298	-0.691	-7.38	-3.63
cg00624799	15	90605618	ZNF710	374655	2	blue	0.109	19.7	11.7	11.8	-10.7	0.802	-5.34	-0.26	-5.27	-14.6	1.69	-8.44	-0.793	-0.837	-0.288	9.73	2.84	4.87	0.125	-7.42	-0.948	0.506	-6.27	3.86	3.4	2.26	1.97	-0.0324	1.05	1.92	1.24	-0.652	-0.358	-0.822	-2.45	-0.164	1.03	10.7	6.38	-0.465	-1.15	-7.73	-4.7
cg00624908	1	3327395	PRDM16;PRDM16	63976	2	blue	-1.51	22.2	12.4	15.2	-7.66	4.77	-4.89	0.627	-6.19	-11.9	4.3	-7.95	3.12	0.857	0.943	13	2.44	4.27	-0.737	-3.79	-1.29	2.97	-5.52	6.02	4.11	6.68	0.482	1.18	2.35	5.42	1.82	-0.408	1.05	-0.113	-1.57	0.741	2.23	11	7.8	0.839	-0.443	-4.65	-3.65
cg00626702	4	1647016	FAM53A	152877	2	blue	-1.03	18.8	17	8.74	-15.3	2.22	-8.81	-1.01	-3.8	-12.9	2.4	-4.53	-3.49	2.79	-1.53	11	2.68	7.31	-1.11	-7.2	-1.75	0.954	-4.69	2.96	4.09	2.98	2.18	0.101	2.38	3.02	0.212	-0.633	2.12	1.05	-0.432	0.975	0.556	11.6	6.03	-0.86	1.03	-4.77	-4.55
cg00628375	17	42390584	RUNDC3A;RUNDC3A;RUNDC3A	10900	5	green	2.31	-6.66	-11.3	1.55	23.2	2.09	15.2	3.65	2.2	9.1	0.679	-0.0855	13.4	-3.57	2.35	-2.32	-0.196	-5.57	3.74	10.9	2.28	2.26	2.44	2.68	0.584	1.71	0.585	0.561	0.666	1.91	4.7	3.11	-0.204	1.36	1.14	-0.413	1.09	-4.82	0.5	2.53	0.621	2.51	6.1
cg00628382	3	176820549	TBL1XR1	79718	2	blue	-4.54	14.1	19.4	7.22	-10.4	7.19	-8.66	-0.172	-3.08	-6.44	6.16	0.0947	-1.38	8.42	-0.148	14.5	0.706	7.45	-2.77	-0.439	-2.93	4.93	-1.09	5.24	3.9	9.66	-0.469	5.05	7.3	6.68	0.711	-0.181	3.3	1.25	0.0859	0.124	0.655	10.9	3.11	1.19	1.95	-1.31	-2.94
cg00629382	8	10268916	MSRA;MSRA;MSRA	4482	7	black	7.82	-6.05	-9.96	-0.339	15.7	-3.07	17.6	6.2	5.9	7.87	-5.61	0.752	8.12	-3.54	3.01	-3.82	2.55	-2.11	8.01	6.59	7.99	-2.65	4.71	2.89	-1.73	-1.87	2.54	0.86	-0.362	-2.56	2.4	3.04	-0.21	2	1.81	-0.587	-0.953	-7.41	0.176	2.05	0.754	2.68	4.76
cg00629427	13	95357638		NA	10	purple	4.31	-9.83	-2.98	-10.1	7.62	-0.358	6.28	3.36	11.5	17.8	-1.46	15.8	0.151	8.77	2.7	-3.97	3.13	3.62	4.14	8.56	3.68	-1.05	12.7	4.6	-0.132	0.656	0.363	8.54	3.81	0.397	0.722	0.231	4.54	5.28	4.8	0.635	-0.235	-8.99	-5.1	3.11	5.4	8.4	4.22
cg00630237	15	91433507	FES;FES;FES;FES	2242	5	green	1.96	-8.24	-12.6	-0.839	18.6	-0.182	12.6	4.76	1.86	8.22	-0.903	0.614	8.8	-4.25	2.29	-4.86	-2.72	-6.22	4.6	7.81	2.78	2.28	2.86	-0.0729	-2.36	-0.174	-0.344	-0.898	-1.24	-1.92	4.58	6.56	-0.0752	1.21	1.85	0.105	-1.69	-3.79	0.345	1.84	1.08	2.09	5.53
cg00632379	6	113306339		NA	2	blue	1.69	20.5	10.7	13.1	-9.32	0.739	-3.89	0.25	-4.31	-14.2	0.0672	-9.22	0.433	-1.59	-1.28	9.35	3.18	5.74	1.08	-7.24	0.648	-0.256	-6.32	3.55	2.72	1.77	4.23	-1.18	0.517	2.2	1.24	-1.19	-0.0571	-0.413	-2.25	0.0384	-0.222	9.68	7.53	-1.85	-1.48	-6.52	-5.14
cg00632466	8	98610888		NA	3	brown	-2.53	18.6	19.9	10.8	-11.6	5.72	-8.33	-0.421	-4.58	-9.56	5.16	-3.68	-0.262	5.04	-0.48	16	2.73	6.68	-2.37	-3.09	-2.38	2.85	-3.16	5.16	5.15	6.94	0.812	2.06	6.42	6.06	0.202	-1.22	1.55	0.00891	-1.72	1.41	0.967	11.3	5.09	0.909	-0.125	-3.64	-3.17
cg00632575	7	5539927	FBXL18	80028	5	green	4.09	-5.62	-7.69	0.233	17.8	1.12	14.6	5.26	4.82	10.3	-0.484	3.15	10.1	-0.323	3.42	-1	1.13	-2.2	5.49	11.1	4.34	1.28	5.71	5.39	-0.248	2.71	0.942	3.4	2.54	1.24	4.15	3.02	2.24	2.7	3.62	1.13	0.243	-5	0.976	3.52	3.01	2.7	5.52
cg00633062	20	61298068	LOC100127888;SLCO4A1	NA	2	blue	-1.54	26.3	14.9	15.5	-10.3	4.37	-6.4	-0.432	-6.5	-14.2	4.36	-8.42	1.51	0.878	-0.0152	13.8	2.95	5.04	-1.38	-5.28	-1.98	2.7	-6.36	5.81	5.08	5.74	1.44	0.826	2.64	5.5	1.84	-1.11	1.16	0.292	-1.78	1.57	1.65	12.7	8.23	0.394	-0.276	-6.12	-3.88
cg00634606	2	218933345	RUFY4	285180	3	brown	0.266	11.6	20.6	5.48	-9.59	5.18	-5.67	0.746	1.35	-3.23	2.65	2.72	-1.91	10.7	0.594	14.3	5.91	11.4	-0.712	0.458	0.553	0.178	2.21	7.43	5.22	7.16	1.51	6.94	10	6.35	-2.13	-3.21	4.81	3.08	1.1	1.4	1.62	5	3.02	1.7	2.83	0.253	-2.04
cg00635560	12	56359158	CDK2;CDK2;SILV	1017	2	blue	-2.71	16.8	13	15.9	-3.84	8.38	-3.17	2.28	-5.41	-6.5	6.3	-4.72	6.58	4.21	0.821	17.5	2.76	3.89	-1.08	1.58	-1.05	4.67	-2.48	7.65	5.85	11.1	0.818	2.95	7.78	7.64	1.7	0.953	2.22	0.363	-0.167	1.85	0.508	10.2	7.04	2.68	0.693	-2.86	-0.396
cg00635695	7	158349388	PTPRN2;PTPRN2;PTPRN2	5799	1	turquoise	12.9	0.967	-1.01	0.43	2.83	-7.19	8.23	10.3	7.88	1.59	-13.4	0.722	1.14	-0.253	0.412	-1.08	3.82	5.35	12.7	-0.125	17.3	-6.71	6.98	5.05	-7.31	-1.81	6.07	2.71	-0.276	-7.69	-1.11	2.82	-0.564	0.705	0.454	0.136	-4.18	-4.76	-0.0583	-2.3	-0.497	-0.00186	-0.647
cg00636527	5	176859356	GRK6;GRK6;GRK6	2870	2	blue	-1.26	26.2	13.1	19.5	-7.52	4.87	-4.21	0.843	-7.28	-13.8	4.37	-10.3	3.95	-0.427	-0.195	14.4	2.73	3.78	-0.375	-4.2	-1.25	2.98	-6.82	5.47	5.16	6.05	2.05	-0.075	3.13	5.3	2.33	0.466	0.522	-0.193	-1.91	1.06	1.19	12.6	9.06	0.667	-0.978	-6.53	-3.46
cg00636737	20	62695569	TCEA2;TCEA2	6919	5	green	1.38	-7.26	-7.29	-0.668	17.9	4.16	10.8	4.1	3.93	13.3	1.52	4.45	11.6	1.38	4.86	-1.38	0.882	-3.03	2.72	13.2	2.7	2.14	5.93	3.4	1.18	3.75	-1.4	2.51	2.63	3.4	2.5	2.74	1.75	2.8	2.83	0.425	1.22	-6.18	-0.788	5.44	2.76	6.22	5.65
cg00637047	10	38384101	ZNF37A;ZNF37A	7587	2	blue	-3.41	21.1	14.6	14.8	-8.96	6.49	-6.82	0.105	-7.23	-11.5	5.68	-6.82	2.78	2.36	0.581	13.9	0.243	3.89	-2.08	-3.54	-2.74	5.55	-5.23	4.54	4.21	8.13	0.145	0.774	3.4	6.26	2.97	0.773	2.88	1.54	-0.013	1.41	0.666	14.3	8.97	1.41	0.27	-5.5	-3.37
cg00637361	16	20493661	ACSM2A	123876	2	blue	-3.53	22.5	16.4	13.9	-9.9	6.22	-7.73	0.00611	-6.74	-11.5	5.25	-6.17	1.8	3.14	-0.889	14.7	1.29	5.04	-2.49	-3.42	-2.24	4.1	-4.79	4.8	4.01	8	1.08	1.39	4.33	6.09	1.03	-0.451	1.84	-0.608	-1.07	1.18	0.954	13.2	7.21	-0.0326	-0.489	-5.19	-3.22
cg00637688	5	135170000	LOC153328	NA	3	brown	-2.8	13.1	18.4	6.36	-11.9	5.83	-9.63	-0.0479	-3.08	-6.65	4.46	-0.455	-2.06	7.29	-0.349	12.4	1.97	7.33	-2.54	-2.54	-1.92	2.51	-0.917	3.94	3.69	6.87	0.278	3.27	6.15	5.14	-1.14	-0.898	2.52	0.682	0.0565	0.963	-0.0379	8.84	3.07	0.334	1.39	-1.51	-2.3
cg00637826	12	12673150	DUSP16	80824	2	blue	3.32	19.8	9.03	14.8	-6.49	1.04	-1.13	1.79	-3.28	-12.4	-0.271	-9.96	2.81	-2.3	-0.443	9.48	3.66	5.71	2.92	-5.59	2.04	-0.407	-5.52	4.73	2.68	2.2	4.65	-0.874	0.531	2.38	2.08	-0.546	-0.335	-0.595	-2.16	-0.118	0.511	8.24	8.29	-1.01	-1.87	-5.67	-3.42
cg00638062	8	108519393		NA	3	brown	2.92	18	15	8.29	-11.6	1.17	-5.03	0.201	-0.158	-9.58	-0.243	-3.36	-2.27	3.29	-0.404	10.2	3.41	10.8	1.7	-6.05	1.3	0.142	-2.27	4.9	2.65	2.91	4.25	1.86	2.28	3.24	1.49	-1.91	1.18	0.821	-1.88	0.643	1.02	9.06	4.73	-0.293	0.118	-2.71	-4.63
cg00638574	1	209956565	C1orf74	148304	2	blue	-3.11	20.4	16.1	12.1	-10.4	5.79	-7.57	0.0411	-5.92	-11.1	5.21	-5.29	0.77	3.49	0.263	13.7	0.777	5.2	-1.88	-3.57	-2.35	4.37	-4.36	4.9	3.43	7.59	0.225	2.12	3.93	5.49	1.81	0.204	2.77	0.77	-0.0701	1.42	0.306	13.4	7.53	0.777	1.19	-5.15	-3.02
cg00639656	17	27050360	SNORD42A;RPL23A;SNORD4B	NA	4	yellow	-3.85	19.1	10.3	21.3	-4.12	7.8	-3.81	0.365	-9.24	-10.5	6.74	-10.2	7.24	-0.434	-0.288	15	1.02	1.03	-2.43	-0.893	-2.74	5.38	-6.85	4.68	5.62	8.59	0.717	-0.458	4.25	7.46	2.67	0.92	0.0594	-1.46	-2.41	0.917	1.49	12.3	8.44	1.42	-1.56	-5.55	-1.06
cg00640719	16	70426268	ST3GAL2	6483	5	green	-1.07	-10.7	-8.66	-3.25	18.8	4.29	9.81	2.87	3.02	15	3.04	6.16	9.19	1.96	3.09	-2.27	-1.41	-4.99	0.855	15.5	0.581	3.75	6.24	2.65	-0.0724	4.46	-2.8	3.42	3.84	2.8	2.56	3	2.68	3.09	3.79	1.11	0.763	-5.85	-1.67	3.7	3.78	6.58	6.97
cg00641579	10	88146442		NA	8	pink	11.4	0.258	-0.685	-0.275	4.34	-4.43	9.2	19.6	9.37	4.49	-8.79	3.41	2.3	2.28	1.15	-0.456	2.7	6.15	19.6	2.32	16.2	-4.68	11.8	7.32	-7.09	0.485	5.95	5.47	1.25	-7.99	1.11	8.18	0.0117	1.09	0.971	1.71	-5.13	-4.98	-1.16	-0.654	0.793	1.23	0.714
cg00642615	15	69590937	PAQR5	54852	3	brown	1.54	14.1	19.8	7.28	-7.32	5.21	-3.35	2.4	2.03	-2.92	3.23	2.06	0.185	10.5	0.516	16	4.62	12.7	1.95	1.21	0.854	2.63	2.56	10.6	5.15	8.76	3.55	7.69	10.2	6.49	2.47	-0.474	4.66	2.25	1.49	1.95	0.584	8.12	4.25	1.48	3.67	-0.584	-0.881
cg00644814	1	6480929	HES2	54626	3	brown	1.04	11.6	17.3	3.67	-13.9	-0.0369	-7.53	-0.519	0.652	-7.34	-0.0189	-0.238	-6.46	5.61	-0.921	9.45	4.22	10.3	-0.0297	-4.87	0.167	-1.53	-0.646	2.93	3.59	1.55	1.81	2.4	5.53	1.33	-1.88	-1.66	1.19	0.0163	-0.662	-0.442	-0.155	6.74	2.03	-0.752	1.07	-2.09	-4.38
cg00647040	17	12634361	MYOCD;MYOCD;MYOCD	93649	3	brown	-3.98	14.2	20.5	7.51	-10.9	6.35	-8.64	-0.473	-3.38	-6.62	5.75	-0.391	-1.42	7.99	-0.417	15.7	2.15	7.22	-3.15	-0.633	-2.85	3.53	-1.26	5.73	4.89	8.77	-0.418	4.83	8.54	6.29	-0.483	-1.24	2.88	0.26	-0.182	1.19	0.949	9.85	3.46	0.991	1.41	-2.72	-2.3
cg00648955	2	31456217	EHD3	30845	2	blue	-3.68	25.3	13.4	16.9	-9.95	5.3	-7.09	-0.867	-9.51	-16.4	5.15	-10.3	2.3	-0.352	-0.596	13.4	0.388	2.56	-2.71	-5.17	-3.04	4.26	-8.36	3.51	3.84	6.58	0.478	-0.483	1.99	5.43	1.77	-0.135	0.477	-0.725	-2.03	0.617	1.29	14.4	8.29	-0.174	-1.18	-6.43	-3.48
cg00649199	10	82119370	DYDC2	84332	8	pink	1	0.316	-0.92	1.47	4.01	0.623	3.35	15	0.801	2.23	0.0957	1.27	3.59	1.2	0.382	0.808	-3.94	-0.171	9.11	2.77	4.94	3.58	6.36	3.2	-5.49	4.53	1.19	2.11	0.728	-5.76	4.31	17.3	1.42	1.99	2.73	3	-3.82	1.54	0.934	-0.0851	2.68	-0.977	1.82
cg00649632	16	16108802	ABCC1;ABCC1;ABCC1;ABCC1;ABCC1	4363	23	darkturquoise	4.08	-6.6	-1.63	-6.05	8.15	0.476	6.77	13.7	10.1	14.9	-2.76	12.5	2.42	8.33	1.69	-1.21	-0.08	3.44	9.24	10.1	8.75	-0.32	19.5	5.48	-5.67	4.31	1.1	8.22	5.22	-4.07	0.0756	8.34	2.84	2.78	3.94	2.79	-4.55	-7.12	-4.94	1.69	3.94	5.09	3.67
cg00649827	15	44038871	PDIA3;CATSPER2P1	NA	17	grey60	12.5	0.35	1.78	-1.6	0.205	-6.53	5.66	4.7	10.1	3.29	-8.65	3.62	-1.76	2.66	2.06	0.213	18.8	7.39	7.37	-0.495	10.5	-17.6	6.75	7.39	1.81	-4.55	4.21	4.68	1.91	-3.7	-9.09	-5.49	1.57	2.63	0.732	0.0419	0.331	-11	-0.218	0.608	1.53	1.45	-3.03
cg00651087	10	103539519		NA	3	brown	-1.09	10.9	17.2	6.66	-8.73	4.88	-5.6	0.751	-0.8	-4.2	3.2	0.562	-1.02	7.53	0.911	14	3.31	8.21	-1.05	0.293	-0.458	2.2	0.449	4.94	4.99	6.71	0.183	4.3	9.59	5.1	-0.345	-0.388	1.93	1.45	-0.513	0.082	0.718	7.24	2.39	2.29	1.24	-1	-0.701
cg00651488	16	85236465		NA	3	brown	-0.258	13.8	23	5.51	-11.7	4.07	-7.56	2.45	0.411	-4.9	2.71	2.17	-3.16	10.6	0.244	13.9	4.4	11.9	0.418	-1.28	0.724	0.563	2.28	7.49	3.27	7.45	1.11	5.99	8.7	3.85	-1.97	-0.597	3.25	0.824	0.495	2.38	-0.367	6.79	2.19	0.98	2.02	-1.51	-4.05
cg00654448	8	142365315		NA	2	blue	1.61	20.4	13.5	13.4	-8.04	2.54	-3.83	3.04	-3.25	-10	1.16	-6.34	2.17	2.03	-0.377	11.9	4.61	6.59	1.88	-4.2	2.07	-0.342	-2.44	7.15	2.52	5.12	3.21	2.76	3.44	2.92	-0.346	-0.859	1.46	0.012	-1.08	0.679	0.267	7.55	7.09	-0.468	-0.702	-5.39	-3.29
cg00654637	9	131156065	MIR219-2	NA	2	blue	-1.63	27	15.6	15.5	-10.2	4.87	-5.85	0.415	-6.15	-14	4.28	-7.74	1.53	1.44	-0.566	14.8	2.84	5.56	-0.82	-4.65	-1.43	2.82	-5.84	6.19	4.35	6.5	2.07	1.34	3.48	5.29	1.75	-0.601	1.8	0.545	-1.47	1.06	1.02	12.7	8.2	0.405	-0.36	-5.79	-4.02
cg00656410	1	1157541	SDF4;SDF4	51150	8	pink	4.66	0.956	-0.309	0.729	2.59	-2.34	4.3	17.5	3.5	1.81	-5.25	1.29	1.87	1.44	1.13	-0.083	-2	2.52	12.4	1.34	10.4	-1.02	8.11	3.03	-8.37	2.48	2	3.26	0.189	-8.43	0.807	12.8	-0.0167	0.351	0.716	2.8	-6.16	-1.17	0.052	-1.06	0.782	-0.62	-0.0339
cg00656728	1	42618506	GUCA2B	2981	3	brown	-4.66	12.7	19.6	6.45	-10.7	7.44	-9.99	0.0296	-3.59	-5.75	6.21	0.624	-1.56	9.24	-1.42	14.3	-0.179	7.36	-3.19	-0.341	-2.86	5.47	-0.185	4.85	3.03	10.4	0.295	4.73	8.53	6.3	0.383	0.0785	4.06	1.18	0.444	2.12	-0.764	11.2	3.39	0.27	1.52	-1.35	-1.56
cg00656881	1	2138757	C1orf86	199990	5	green	2.06	-11.2	-7.98	-4.88	18.2	2.48	10.9	4.74	6.96	18.3	-0.00723	8.33	7.42	3.19	3.8	-2.6	2.11	-2.14	3.18	15.4	3.8	0.184	9.59	4.62	0.367	2.92	-1.48	5.49	4.47	1.58	0.584	1.94	1.93	2.75	3.01	0.835	0.74	-9.82	-3.72	4.15	3.18	7.21	6
cg00658411	16	4467558	CORO7	79585	4	yellow	-1.58	17.8	9.43	16.5	-5.75	4.81	-3.24	0.627	-7.11	-11.8	3.65	-9.66	4.58	-1.14	0.163	12.3	1.08	1.83	-0.815	-2.77	-1.11	2.81	-6.3	4.07	3.08	5.86	1.11	-0.333	2.98	4.74	1.66	0.146	-0.46	-1.38	-1.96	-0.186	0.2	10.2	7.74	-0.143	-1.03	-7.54	-2.43
cg00660765	3	69371349	FRMD4B	23150	2	blue	-2.31	26.2	13.5	16.7	-10.2	4.07	-6.19	0.306	-8.12	-16.6	3.56	-10.3	1.77	-0.731	-0.591	12.8	1.16	3.67	-1.18	-5.95	-1.52	3.13	-7.57	3.09	3.69	5.22	1.22	-0.915	1.88	3.94	1.73	0.747	0.0827	-0.615	-2.46	0.505	0.524	13.6	8.12	-0.224	-1.64	-6.9	-3.76
cg00661732	3	61860646	PTPRG	5793	7	black	6.4	-7.42	-11.5	-0.729	18.2	-2.01	17.8	4.81	5.47	9.02	-3.86	0.961	8.8	-3.85	2.09	-4.44	1.86	-3.23	6.57	7.63	5.88	-1.74	4.15	2.28	-1.72	-1.81	2.47	0.248	-0.48	-1.51	2.86	2.31	-0.178	1.8	1.46	0.25	-0.215	-7.75	0.233	1.6	0.725	2.34	4.77
cg00661947	12	65939993		NA	2	blue	0.333	17.4	9.03	11.5	-9.15	0.63	-4.9	-0.673	-5.23	-13.7	0.638	-9.3	0.457	-1.89	-1.06	7.28	0.692	4.29	0.0941	-7.69	-0.571	1.32	-6.98	2.15	1.59	1.95	2.53	-1.99	-1.47	1.89	2.05	-0.576	0.0231	-1.09	-2.16	0.661	0.534	10.7	7.72	-1.84	-1.65	-4.6	-3.77
cg00664222	8	124934735	FER1L6	654463	3	brown	-2.29	13.4	23.3	4.78	-14.3	4.73	-9.79	-1.12	-0.884	-6.43	3.75	1.49	-4.56	9.55	-0.975	13	2.57	10.1	-2.52	-2.32	-1.92	2.12	-0.122	5.08	3.77	6.62	0.881	5.44	7.51	5.52	-0.888	-2.7	4.2	1.11	0.55	1.05	0.701	8.61	2.91	0.365	2.15	-1.84	-3.3
cg00664446	6	134141554	MGC34034;MGC34034	NA	3	brown	2.08	18.3	14.5	10.5	-8.55	2.61	-3.37	1.7	-1.06	-8.58	1.2	-4	0.385	3.31	-0.94	12.6	3.93	9.5	2.01	-3.39	1.37	0.84	-2.06	6.31	3.34	4.62	4.84	2.46	5.09	3.87	1.73	-0.747	2.29	0.929	-1.36	-0.126	-0.288	8.95	6.03	-0.447	-0.171	-3.44	-4.08
cg00664666	1	247453113		NA	22	darkgreen	-9.81	3.16	2.65	4.76	0.598	9.92	-3.81	-1.52	-6.93	-1.43	10.7	-1.45	4.43	2.1	-0.607	5.27	-10.3	-2.72	-4.87	4.06	-7.75	20.4	-2.9	-0.0234	2.22	10.2	-2.99	1.08	3.18	7.67	11.1	6.48	3.13	1.61	2	1.92	1.38	13	3.75	1.66	3.06	-0.964	5.84
cg00665106	1	201515370		NA	2	blue	0.223	24.9	15.7	13.3	-10.2	3.41	-5.2	2.61	-4.18	-12.4	1.98	-6.48	0.859	2.28	-0.991	13.3	2.19	7.13	1.49	-4.8	0.908	1.91	-3.66	5.77	2.5	5.95	3.24	2.62	3.29	3.29	1.43	0.842	1.36	0.0897	-1.29	0.9	0.431	11.1	6.78	-1	-0.389	-5.25	-3.38
cg00665343	7	691506	PRKAR1B;PRKAR1B;PRKAR1B;PRKAR1B;PRKAR1B;PRKAR1B	5575	7	black	2.44	-7.61	-12.5	0.228	21.4	1.27	15.1	3.61	2.94	9	-0.0908	0.423	11.3	-3.75	1.29	-3.89	-1.66	-5.48	4.09	9.69	2.41	2.71	2.59	1.43	-1.41	1.02	1.11	0.471	-0.325	0.912	5.64	3.44	-0.299	1.53	1.45	-0.627	1.3	-5.14	-0.0274	1.48	0.952	3.01	6.57
cg00665650	5	138676787	PAIP2;PAIP2	51247	5	green	0.962	-12.1	-11.2	-4.54	18.3	2.05	10.7	3.35	4.04	15.5	0.277	5.68	8.07	0.188	3.63	-5.4	-1.78	-5.15	2.27	11.5	2.37	2.21	6.59	0.718	-1.68	1.71	-1.81	2.52	0.6	0.871	2.43	2.97	1.5	2.59	3.49	0.818	-0.2	-8.23	-2.9	3.78	2.6	6.29	7.04
cg00666746	19	15217781	SYDE1	85360	3	brown	-1.15	12.4	24.2	4.66	-11.2	5.49	-7.41	0.614	0.875	-3.55	4.33	3.27	-3.21	11.9	-0.696	14.6	3.56	11.5	-0.838	0.0661	-1.19	2.41	2.02	7.3	4.97	7.93	1.81	7.13	10.2	6.15	0.205	-1.33	4.45	1.47	1.63	2.26	0.26	7.52	2.47	1.44	3.32	0.109	-1.62
cg00668890	12	6449990	TNFRSF1A	7132	10	purple	3.19	-10.6	-3.61	-10.4	8	0.874	4.69	3.65	10.6	18.6	-2.09	14.2	0.849	7.84	0.918	-5.03	1.09	2.84	3.16	9.16	4.46	-1.01	13.1	2.4	-1.77	1.06	0.704	6.93	2.42	0.318	-0.947	0.651	3.56	3.23	4.33	1.17	-0.872	-9.88	-5.65	1.16	3.94	10.6	4.11
cg00669390	16	85348945		NA	2	blue	-1.53	19.8	16.9	11.4	-9.48	5.03	-5.82	1.12	-3.71	-9.4	5.1	-3.8	0.63	4.63	-0.0902	15	2.98	7.11	-0.323	-2.38	-1.68	3.19	-2.81	7.25	5.08	7.76	1.64	3.83	5.54	5.47	1.74	0.183	2.97	0.929	0.58	1.76	1.81	11.3	6.45	0.961	1.79	-3.84	-2.29
cg00669746	2	181556997		NA	26	darkorange	-3.46	6.27	7.53	7.46	2.22	13	-0.0543	6.42	-1.51	2.15	7.18	2.38	8.54	9.03	2.32	12	-1.44	3.22	0.874	9.31	0.536	8.76	4.44	8.6	1.42	18.3	-0.701	8.45	10.1	8.03	3.6	4.96	4.37	2.25	2.64	1.87	-0.817	5.75	2.77	4.27	3.12	1.69	3.36
cg00669760	2	44735195	C2orf34	NA	3	brown	-0.366	18	17.6	9.8	-10.7	4	-5.8	0.988	-2.47	-9.13	3.12	-3.17	-0.719	4.69	0.066	14.2	2.29	8.49	0.205	-3.12	-0.605	2.52	-2.21	5.19	3.54	5.99	2.2	2.9	5.88	4.33	1.51	-0.148	2.11	0.707	-1.13	0.301	0.224	11.3	5.25	0.615	0.0023	-3.98	-2.42
cg00670111	7	128500474		NA	3	brown	0.608	12	20.1	6.11	-7.46	5.88	-4.08	2.43	1.83	-2.36	3.74	2.96	-0.848	11.2	0.0552	15.9	4.55	12.2	1.06	2.12	0.454	2.17	2.92	9.97	5.09	8.87	2.8	8.11	12.2	6.45	0.883	-0.845	4.21	1.8	1.79	2.19	0.197	6.57	2	1.68	3.76	-0.0492	-0.997
cg00671225	6	133138165	RPS12;SNORA33	NA	22	darkgreen	-12.7	1.15	1.68	4.51	2.54	14	-3.66	-1.07	-7.99	0.627	12.2	-0.481	6.55	2.71	-0.359	5.61	-11.6	-4.66	-6.46	6.92	-7.88	20.8	-2.1	-1.29	1.42	12.1	-4.36	0.276	4.75	8.98	8.42	6.13	2.17	0.399	1.95	0.958	1.32	9.45	1.78	2.81	1.73	0.787	5.28
cg00671386	16	851834	GNG13	51764	3	brown	-0.803	15.9	18.7	9.56	-8.24	6.28	-5	0.908	-1.35	-5.69	5.18	-0.636	0.718	7.87	-0.128	16.4	3.62	8.85	-0.345	0.0165	-1.14	3.45	-0.514	8.6	5.36	8.71	2.25	5.51	8.62	7.59	1.94	-1.05	5.25	3.01	1.69	0.413	1.38	9.62	5.81	1.83	3.18	-2.68	-1.82
cg00672332	2	220156225	PTPRN	5798	5	green	1.35	-8.69	-10.7	-0.94	22.6	2.19	13.7	4.6	2.73	12.1	0.726	2.95	11	-1.24	2.34	-2.81	-1.14	-5.36	3.52	12.5	2.7	2.72	4.96	2.6	-0.799	2.72	-0.345	2.73	1.83	0.938	3.75	4.37	1.05	1.44	2.16	0.218	0.368	-5.44	-0.403	2.83	1.42	3.37	6.85
cg00672712	7	99752629	C7orf43	55262	5	green	1.53	-2.64	-5.25	3.92	17.2	5.24	11.8	5.19	2.01	8.67	2.71	1.58	15.2	0.66	3.79	2.27	0.64	-2.53	3.69	13.1	2.73	4.42	4.54	6.87	1.54	6.78	0.122	3.98	3.6	4.81	5.34	3.77	3.13	3.81	3.31	-0.114	3.18	-2.06	3.27	3.71	3.27	3.82	7.03
cg00672802	1	226296871		NA	10	purple	2.14	-11.2	-5.98	-6.28	14.3	2.33	8.48	4.35	7.85	21.6	-0.273	11	6.01	5.83	3.41	-3.06	1.74	-0.611	2.95	13.4	3.85	0.092	11.6	3.88	-0.592	2.67	-1.08	5.43	4.63	1.52	-0.0667	1.37	2.42	2.5	3.02	0.96	-0.071	-9.62	-4.07	4	3.25	9.08	5.49
cg00673191	21	37536923	DOPEY2	9980	5	green	3.36	-12.6	-7.12	-7.06	15.9	1.61	11.4	5.61	9.88	21.6	-0.797	11.4	4.99	4.76	2.37	-3.48	0.58	0.183	5.15	14.3	4.33	0.932	12	3.06	-0.435	1.85	0.543	5.62	4.88	0.556	2.55	3.94	2.86	3.87	4	0.42	-0.221	-8.8	-4.45	3.33	4.26	7.79	6.14
cg00673344	3	156807691		NA	5	green	1.51	-10.4	-11.6	-2.34	21.2	1.63	12.7	3.8	3.2	13.4	-0.187	3.39	9.84	-1.4	3.45	-4.22	-0.657	-5.77	2.77	11.7	3.08	1.64	5.37	1.78	-1.15	1.48	-1.54	2.5	1.47	0.756	2.47	2.86	-0.241	1.53	1.69	-0.0831	-0.688	-7.94	-2.2	3.27	0.996	4.15	6.46
cg00673646	11	59950525	MS4A6A;MS4A6A;MS4A6A;MS4A6A;MS4A6A;MS4A6A	64231	3	brown	-3.18	12.9	18.7	6.21	-10.5	6.51	-8.45	-0.158	-2.22	-5.52	5.19	0.755	-1.52	8.78	-0.381	13.4	1.31	8.41	-2.43	-0.805	-2.21	4.42	-0.333	4.82	4.29	8.56	0.0904	5.4	7.75	6.47	0.742	-0.487	3.71	1.8	0.164	1.34	1.83	10.1	3.17	0.316	2.25	-0.346	-1.8
cg00675121	10	128214096		NA	2	blue	-1.78	23.4	14.6	14	-11.7	3.84	-7.91	-0.035	-6.55	-14.7	3.21	-8.09	0.46	0.849	-0.791	11.8	1.81	4.73	-1.46	-6.72	-1.55	1.62	-5.98	3.53	3.2	4.65	1.57	-0.788	1.64	3.81	0.231	-0.861	0.121	-1.31	-2.11	1.18	0.056	11.3	6.28	-0.143	-1.46	-6.74	-4.21
cg00677574	17	43221327	ACBD4;ACBD4;ACBD4;ACBD4	79777	3	brown	-0.727	11.2	21.5	3.49	-13.1	3.76	-8.45	-0.251	0.607	-4.78	2.56	2.78	-5.03	10.1	-1.04	12	2.86	11.2	-1.09	-1.91	-0.859	1.39	1.26	4.74	3.27	5.61	1.52	5.11	8.06	4.38	-0.857	-1.62	3.18	1.33	-0.376	1.33	-0.324	8.08	1.68	0.167	1.77	-1.03	-2.98
cg00677686	2	65096299		NA	5	green	2.51	-8.6	-11.1	-1.18	20.5	1.3	13.9	3.77	3.77	11.2	-1.05	2.73	10.2	-1.62	3.12	-3.65	-1.18	-4.53	3.8	11.4	3.55	2.16	4.65	2.01	-1.16	1.57	-0.159	2.16	1.02	1	4.1	3.42	0.838	2.33	1.99	-0.311	-0.201	-5.83	-0.702	3.14	1.65	3.9	6.03
cg00679383	4	2009215	WHSC2	NA	5	green	1.06	-6.71	-11.4	1.67	23.2	2.12	13.8	3.96	0.693	8.72	1.11	-0.352	13.9	-3.83	4.65	-2.38	-0.474	-7	2.89	10.6	2.21	2.52	2.5	2.47	-0.108	2.16	-2	0.429	0.237	1.13	3.8	3.89	-0.0596	1.85	1.2	-0.456	0.558	-4.58	0.927	4.52	0.782	2	6.43
cg00682007	5	140344745	PCDHA7;PCDHAC2;PCDHA12;PCDHA6;PCDHA10;PCDHA4;PCDHA11;PCDHA8;PCDHA6;PCDHA1;PCDHA2;PCDHA1;PCDHA9;PCDHA13;PCDHA5;PCDHAC1;PCDHA3;PCDHA10	NA	5	green	0.75	-11.5	-7.17	-5.61	15.7	3.14	9.42	4.57	6.11	18.3	0.57	9.17	6.82	4.1	2.63	-2.64	-0.32	-2.35	2.43	15.4	3.18	1.6	9.53	2.32	-0.715	3.46	-1.33	5.77	4.71	1.39	0.773	3.14	1.49	2.2	2.86	0.202	-0.17	-8.25	-4.44	3.23	2.91	7.64	6.53
cg00682734	20	55200973		NA	10	purple	5.84	-9.26	-2.95	-8.62	9.05	-0.00947	8.35	5.52	13	19.4	-2.15	14.6	1.69	8.54	3.38	-2.98	4.35	4.05	6.11	10.2	5.76	-2.23	15.4	6.67	-0.335	1.31	0.975	9.98	4.65	0.269	0.399	0.42	4.98	5.15	5.41	0.905	0.951	-10.6	-4.04	3.27	6.47	8.5	4.69
cg00684178	2	242752080	NEU4;NEU4;NEU4;NEU4;NEU4;NEU4;NEU4;NEU4	129807	2	blue	2.49	18.5	11.7	11.9	-7.48	1.84	-2.44	3.4	-2	-9.65	0.813	-6.18	1.43	1.17	-0.128	10.6	4.67	7.17	3.32	-4.25	2.1	-0.259	-2.6	6.92	3.09	3.99	4.26	2.55	2.76	2.41	1	0.296	1.37	0.76	-1.37	0.139	-1.04	7.68	6.46	-0.246	-0.805	-4.64	-4.93
cg00684283	14	105943425	CRIP2	1397	4	yellow	-0.348	14.7	7.41	17.3	-2.88	4.07	-1.06	1.55	-5.92	-9.03	2.78	-10.1	6.42	-2.09	0.328	11.1	2.11	1.57	0.203	-1.62	0.22	2.25	-5.17	4.85	3.66	4.95	1.59	-0.494	3.09	4.28	2.18	0.409	-0.819	-1.45	-2.77	0.119	0.0258	8.09	7.79	0.42	-1.99	-5.79	-0.683
cg00685314	12	120307689	CIT	11113	2	blue	-0.741	18.8	11.6	13.9	-6.12	4.67	-3.12	2.61	-4.25	-9.74	4.05	-6.43	3.39	1.54	-0.141	13.1	0.123	5.47	1.44	-2.03	-0.337	4.62	-3.73	5.73	2.39	7.54	2.34	1.35	3.51	4.4	4.07	2.42	1.96	0.725	-0.107	1.39	0.208	12	7.75	-0.0531	1.13	-3.88	-1.63
cg00686132	6	168257835	MLLT4;MLLT4;MLLT4	4301	2	blue	-1.25	18.4	10.8	14.1	-6.73	4.43	-3.29	1	-5.84	-11.2	3.32	-7.93	2.91	0.013	0.586	12.1	0.899	3.9	-0.228	-3.09	-0.766	3.26	-5.22	4.34	2.77	5.68	1.2	0.582	3	4.22	2.71	0.543	0.2	-0.762	-0.838	1.8	0.598	11.1	6.88	0.568	-0.345	-6.97	-3.13
cg00686404	15	66858212	LCTL	197021	2	blue	-2.16	22.7	16.4	13.1	-10.4	5.32	-6.7	-0.786	-5.43	-11.7	4.93	-6.01	0.918	2.82	-0.557	14.4	2.28	6.25	-1.76	-3.98	-2.55	3.32	-5.29	5.18	5.14	6.3	1.64	1.61	4.15	6.3	1.83	-1.15	0.846	-0.622	-2.24	0.022	1.05	12.9	6.27	0.343	-0.716	-4.65	-3.87
cg00687444	16	30689627		NA	2	blue	-2.23	25.5	14	15.7	-10.4	4.18	-6.36	0.664	-7.66	-16	3.29	-9.46	1.47	-0.0474	-0.863	13	0.169	4.01	-0.869	-5.57	-1.21	3.48	-6.75	3.3	2.41	5.89	1.35	-0.181	2.07	3.78	1.87	0.831	0.111	-0.996	-2.2	0.648	0.131	14	7.56	-0.783	-1.41	-6.78	-3.57
cg00687812	12	132600706	EP400NL	347918	8	pink	2.68	2.16	1.66	3.5	4.97	3.04	4.91	21.3	2.46	3.8	-0.552	2.38	6.41	4.14	1.75	4.5	-1.72	2.57	11.3	6.12	8.44	3.08	9.72	7.9	-5.57	8.4	1.53	6.07	4.86	-3.3	3.57	14.2	1.45	1.82	1.9	3.41	-4.94	0.279	0.568	1.37	2.02	0.0432	2.58
cg00688734	10	134878244		NA	5	green	-0.665	-5.37	-9	3	20.2	4.84	11.4	3.52	-0.396	8.24	3.12	-0.258	15.4	-2.36	2.9	-0.396	-1.51	-6.64	1.39	12.3	1.01	4.8	2.17	2.09	1.14	4.49	-1.36	0.64	2.11	3.71	4.37	4.13	0.333	1.55	1.81	-0.854	1.17	-3.11	1.42	3.48	1.04	2.12	6.9
cg00688810	17	7517138	SHBG;FXR2	NA	5	green	0.804	-4.37	-6.6	2.82	19.3	4.95	12	5.07	1.83	10	2.46	1.55	15.5	0.232	4.11	0.921	-0.392	-3.73	3.04	13.9	2.85	4.4	4.83	4.97	0.53	6.23	-0.913	3.65	3.32	3.91	4.57	4.02	1.71	2.17	2.07	1.02	1.55	-3.27	1.18	5.13	1.93	3.04	7.3
cg00688820	7	138603496	KIAA1549;KIAA1549	57670	5	green	1.12	-5.66	-11.2	2.9	21.9	2.4	13.3	3.51	0.114	7.41	1.2	-1.6	14.9	-4.59	3.36	-1.92	0.96	-7.09	2.32	9.88	2.19	1.29	1.47	2.52	0.688	1.97	-0.989	-0.342	-0.141	1.69	2.53	2.49	-0.945	1.19	0.0696	-0.109	1.37	-5.34	0.809	3.48	-0.196	1.68	4.95
cg00689316	20	37300418		NA	3	brown	-0.315	11.3	20.6	3.4	-13	4.11	-8.55	0.135	0.985	-4.39	2.42	2.88	-4.67	10.3	-0.85	11.1	3.37	11.6	-0.844	-2.07	-0.355	0.978	1.7	5.59	3.07	5.99	1.74	5.94	7.17	4.95	-1.28	-2.42	3.87	1.56	1.26	0.76	0.299	6.15	1.81	0.438	2.23	-0.77	-2.59
cg00689835	2	169757618	G6PC2;G6PC2	57818	2	blue	-1.42	26.7	15.2	14.6	-10.7	4.37	-5.87	-0.0196	-5.96	-14.5	3.7	-7.96	0.907	1.03	-0.761	13.6	1.41	6.1	-0.625	-5.3	-1.67	3.43	-6.36	4.37	3.82	5.73	2.27	0.896	2.69	4.97	2.62	-0.0926	1.43	0.342	-1.31	0.742	0.822	13.8	7.78	0.103	-0.309	-6.07	-3.76
cg00690195	8	8915582		NA	3	brown	-1.92	6.94	17.7	1.42	-7.59	6.08	-6.42	1.22	1.98	0.733	4.33	7.64	-2.75	16.7	-0.521	11.7	2.51	10.3	-1.16	3.08	-0.798	3.31	4.88	7.13	3.57	9.32	0.94	9.04	12.7	5.91	-0.409	-0.731	4.76	2.12	2.02	1.41	-0.82	5.28	-0.0312	1.08	3.16	2.23	-1.33
cg00691974	4	185087958	ENPP6	133121	5	green	0.782	-14	-9.04	-6.99	17.3	2.12	10.5	4.27	6.3	18.8	0.202	9.29	5.79	3.08	3.01	-4.19	-2.02	-3.09	2.81	14.7	2.63	2.55	9.35	1.36	-2.15	2.54	-1.52	4.53	3.92	0.332	2.33	3.92	1.76	2.21	3.38	0.649	-1.11	-7.76	-4.51	3.38	3.09	7.1	7.28
cg00692173	1	53217358	ZYG11B	79699	3	brown	-0.0701	11.9	17.6	5.97	-8.84	5.56	-5.56	3.36	0.404	-3.72	2.44	1.89	-1.11	9.19	-0.302	13.1	2.83	10	1.09	-0.196	1.31	1.81	2.46	6.32	2.22	7.4	2.37	5.08	8.26	4.1	-0.143	0.806	3.51	1.32	1.15	1.19	-1.61	7.05	2.88	1.15	1.66	-0.666	-2.41
cg00692462	1	4773089	AJAP1;AJAP1	55966	5	green	3.07	-7.14	-11.2	0.187	20.2	1.23	13.9	4.59	2.91	9.3	-0.727	0.788	10.9	-3.26	3.43	-3.69	-0.0187	-4.84	4.49	9.2	3.81	1.39	3.56	1.79	-0.353	0.714	-0.465	0.681	-0.232	0.54	3.79	4.09	-0.0533	1.92	1.64	-0.0852	1.05	-5.37	0.341	3.51	0.687	3.18	5.62
cg00693240	16	4684507	MGRN1;MGRN1;MGRN1;MGRN1	23295	2	blue	-2.46	27.7	14	17.7	-9.3	5.08	-5.77	-0.411	-8.01	-15.4	5.14	-9.86	2.61	-0.0661	-0.546	14	1.02	4.01	-1.5	-4.99	-2.74	4.56	-7.65	4.34	4.89	6.24	1.54	-0.0698	2.5	5.74	3.3	0.389	1.03	0.236	-1.77	0.937	1.46	15.6	8.91	0.357	-0.569	-6.78	-2.55
cg00693994	4	156586710	GUCY1A3;GUCY1A3;GUCY1A3;GUCY1A3;GUCY1A3;GUCY1A3	2982	2	blue	0.409	18.3	10.4	12.5	-7.61	3.42	-3.69	1.33	-4.04	-11.2	2.1	-7.17	1.73	0.18	-0.592	10.1	0.619	5.85	1.45	-4.71	-0.0587	2.9	-4.91	4.13	2.16	4.53	3.31	-0.0114	1.64	3.86	3.46	0.805	-0.447	-1.61	-2.31	1.04	-0.934	11.1	5.05	-0.466	-2.3	-4.13	-3.25
cg00694258	10	32038939		NA	2	blue	-2.21	17.9	17.8	11	-9.74	5.8	-6.49	2.12	-3.83	-8.51	4.54	-3.1	0.548	5.23	0.356	15.5	1.71	6.63	-0.32	-1.98	-0.906	3.98	-1.82	6.49	3.61	8.28	0.935	3.54	6.26	4.94	1.86	1.54	2.91	1.08	0.503	1.43	-0.32	11.4	6.22	1.57	1.45	-4.35	-1.92
cg00695112	9	71862747	TJP2;TJP2;TJP2;TJP2;TJP2;TJP2	9414	3	brown	-3	14.2	20.2	7.9	-10.5	7.03	-8.37	0.339	-2.73	-6.26	5.07	-0.237	-0.907	7.96	-1.22	15.2	2.03	8	-2.39	-0.886	-1.73	3.44	-0.538	4.8	4.56	8.39	1.18	3.8	8.16	6.41	-0.502	-0.557	3.21	0.655	0.457	1.55	0.56	9.84	3.98	0.489	1.57	-2.09	-2.81
cg00695391	1	2525548	MMEL1	79258	3	brown	0.286	11.4	19.9	4.07	-9.92	3.84	-6.15	1.57	1.64	-3.14	2.26	3.21	-3.18	10.9	-0.753	12.3	4.39	11.8	0.275	-0.357	0.589	0.548	2.62	7	3.6	6.51	2.42	6.21	9.21	4.29	-0.998	-1.39	4.46	1.75	1.52	2.53	0.127	6.01	2.69	0.143	3.34	0.0548	-2.85
cg00695799	6	149803087	ZC3H12D	340152	10	purple	1.96	-13.3	-7.28	-7.65	14.6	1.86	8.55	3.35	7.68	22.1	-0.118	10.8	5.03	4.52	4.04	-4.49	0.877	-1.7	2.46	12.9	2.97	0.456	10.6	2.24	-0.303	1.43	-1.79	4.87	3.71	1.15	0.713	1.62	2.29	3	3.24	0.723	0.33	-9.92	-4.38	4.62	3.75	7.21	5.71
cg00696323	3	124520019	ITGB5	3693	3	brown	-1.14	22.8	19.1	11.4	-12.5	4.05	-7.98	1.59	-3.94	-11.3	3.18	-4.4	-0.665	4.24	-0.742	14.2	2.4	7.69	-0.0691	-4.97	-0.388	1.92	-2.89	5.64	2.94	6.52	1.92	2.08	3.87	3.87	0.275	-0.131	2.23	0.286	-0.914	1.32	0.457	10.6	6.05	0.123	0.0489	-4.49	-4.38
cg00696464	14	24002201		NA	5	green	0.0623	-4.42	-8.9	3.3	17.3	2.68	11	4.88	-0.698	6.4	0.609	-1.35	13.9	-3.2	3.69	-0.985	-1.59	-6.6	2.38	9.52	3.03	2.5	2.23	1.45	-1.69	3.58	-1.84	-0.186	0.639	0.756	2.31	4.29	-0.762	0.49	0.427	-0.745	-0.805	-3.85	1.36	3.27	-0.232	1.86	5.3
cg00697668	14	105617575	JAG2;JAG2	3714	5	green	1.77	-9.65	-15.2	-0.899	21.9	-0.279	13.8	3.3	1.33	8.93	-0.74	-0.111	10.2	-5.56	2.08	-5.86	-1.08	-7.97	3.17	8.11	2.37	0.98	2.14	-0.408	-0.882	-1.02	-0.463	-1.54	-1.96	-1.14	3.21	4.46	-0.564	1.41	2.18	0.102	0.0519	-6.06	0.258	1.87	1.35	2.34	6.26
cg00697703	7	25018855	OSBPL3;OSBPL3;OSBPL3;OSBPL3	26031	5	green	2.13	-12	-11	-4.71	18.4	1.14	10.5	3.63	4.88	16.4	-0.586	5.6	7.69	0.193	2.78	-5.7	0.351	-4.32	2.9	10.4	3.04	0.479	6.99	1.29	-0.466	0.334	-0.787	2.39	0.787	0.274	1.58	2.51	0.358	1.78	1.93	0.246	-0.664	-9.19	-3.14	3.69	1.07	6.24	6.3
cg00698413	2	225266656	FAM124B;FAM124B;FAM124B;FAM124B	79843	3	brown	-1.11	14.9	18.1	6.03	-13.6	3.13	-8.3	0.729	-1.74	-8.54	2.42	-0.966	-4.07	6.21	-1.11	11.3	2.2	8.65	-0.524	-3.92	-0.514	1.4	-0.94	4.59	2.27	5.3	1.25	4.3	5.37	3.12	-0.573	-0.653	2.59	0.33	0.848	1.62	0.0505	8.8	3.43	-0.222	1.57	-5.21	-4.53
cg00698916	6	13767628		NA	5	green	1.64	-13.6	-7.81	-7.68	14.6	1.62	8.61	3.73	7.24	20	-0.0482	10.3	4.69	3.99	2.88	-4.45	1.33	-1.82	2.47	12.6	2.98	-0.182	10.1	2.22	-0.299	1.29	-1.27	4.23	3.87	0.594	-0.224	1.61	2.17	2.52	2.98	0.726	0.346	-10.6	-5.09	3.72	2.8	9.08	5.14
cg00699569	1	157536296		NA	2	blue	4.22	17.6	9.28	13.3	-4.22	1.88	0.627	6.96	-1.1	-8.24	-0.246	-6.54	3.79	0.285	0.58	10.6	3.88	7.23	6.51	-2.54	4.6	0.357	-1.11	7.82	1.87	4.68	4.55	2.95	2.97	1.24	2.95	3.41	-0.0672	0.314	-2.39	0.872	-1.01	7.43	6.07	0.212	-1.22	-5.08	-2.66
cg00699986	20	25057444	VSX1	30813	2	blue	-0.651	19.4	10.6	15.7	-6.39	3.97	-3.59	1.34	-6.12	-11.2	3.01	-8.9	3.93	-0.365	0.297	11.9	2.51	3.17	-0.107	-3.69	-0.0596	1.84	-5.13	5.57	2.96	5.63	1.84	0.086	2.36	4.13	1.36	-0.411	1.12	-0.671	-0.612	0.702	0.76	9.33	8.55	0.768	-0.506	-6.35	-1.83
cg00699997	1	121485059		NA	22	darkgreen	-13.3	3.09	2.96	4.14	-1.47	9.36	-6.57	-3.44	-9.58	-3.16	11.8	-2.17	2.53	0.988	-1.74	4.74	-11.4	-4.07	-7.67	1.91	-10.7	17.3	-5.3	-3.54	1.59	8.1	-3.83	-1.97	2.08	6.17	7.49	5.38	2.11	0.199	0.821	1.11	-0.0745	13.7	3.38	0.557	0.876	-1.05	3.41
cg00700866	1	38096105	RSPO1	284654	3	brown	-0.711	14.7	19.5	8.51	-9.31	6.07	-5.51	1.16	-1.18	-5.71	3.6	-0.346	-0.114	7.93	-0.213	16	4.79	9.25	-0.666	-0.129	0.0207	1.16	-0.0847	7.42	5.23	7.89	1.84	5.77	8.81	6.48	-1.1	-2.02	2.75	0.752	-0.0629	0.944	1.43	7.08	3.63	1.37	1.03	-0.599	-1.63
cg00701951	10	124228478	HTRA1	5654	2	blue	1.2	20.3	10.5	14.5	-7.55	2.63	-2.99	0.951	-4.44	-12.8	1.31	-9.16	2.26	-1.2	-1.3	10.6	2.36	5.18	1.25	-5.16	0.597	1.22	-5.73	4.34	2.77	3.7	4.07	-0.0732	1.36	3.6	2.27	-0.332	0.139	-0.396	-1.61	0.313	0.716	9.73	7.47	-1.21	-1.2	-6.36	-3.46
cg00702126	1	1369793	VWA1;VWA1	64856	3	brown	-0.908	19.1	21.7	8.64	-14.5	3.78	-8.54	-0.683	-2.6	-9.97	3.39	-2.68	-2.63	5.47	-0.236	13.7	3.95	8.81	-1.48	-4.73	-1.57	1.23	-2.53	5.43	4.96	5.13	1.44	3.22	5.24	4.99	-0.166	-2.44	2.76	1.35	-0.435	1.32	1.37	9.75	4.87	0.309	1.19	-4.07	-4.32
cg00702417	1	6054867		NA	5	green	3.43	-8	-10.2	-1.31	18.7	0.205	14.8	7.37	4.43	10.6	-2.37	2.89	9.04	-1.36	2.34	-3.37	-0.947	-3.64	6.21	10.6	5.88	0.471	6.46	1.79	-3.48	1.45	0.598	2.2	1.41	-1.93	2.3	5.26	-0.13	0.646	2.3	0.408	-1.62	-6.87	-1.14	2.49	0.579	3.14	6.04
cg00703849	19	53229766	ZNF611;ZNF611;ZNF611;ZNF611	81856	8	pink	-0.631	1.07	0.00916	2.07	3.29	2.33	2.07	15.6	-0.603	1.44	0.821	0.679	3.58	1.45	-0.355	1.87	-5.02	-0.423	7.97	3.2	4.63	3.93	5.92	2.51	-6.45	5.61	0.679	2.31	1.64	-5.52	3.06	18	0.375	-0.00581	1.34	3.13	-6.56	2.43	0.241	-0.108	1.19	-1.81	1.98
cg00704780	2	242207920	HDLBP;HDLBP	3069	2	blue	-2.97	15.4	17.6	9.39	-8.42	7.43	-6.78	1.63	-3.28	-6.11	6.15	-1.13	1	7.25	0.217	15.5	1.48	6.89	-1.25	0.0449	-1.58	4.89	-0.441	6.49	4.66	10.2	0.53	4.76	7.56	6.66	1.32	1.13	3.54	1.21	1.31	1.84	0.948	10.8	4.45	1.12	2.12	-2.57	-1.79
cg00705730	2	106438120	NCK2;NCK2	8440	2	blue	1.54	21.4	10.7	13.6	-9.24	1.62	-3.76	-0.144	-4.39	-14.7	0.738	-9.42	0.823	-1.49	-1.32	9.81	2.46	5.84	0.917	-6.9	0.0985	0.898	-6.71	3.64	3	2.49	4.2	-1.05	0.34	3.31	2.39	-0.938	-0.266	-0.557	-2.47	0.59	0.37	10.8	7.09	-1.64	-1.71	-6.8	-4.52
cg00706207	10	7714954		NA	2	blue	-4.33	19.7	11.1	15.7	-7.87	6.39	-6.05	-0.857	-9.39	-13.6	5.85	-9.4	3.23	-0.151	-1.63	12.3	-1.17	2.12	-2.82	-3.79	-3.44	6.12	-7.76	3.38	2.94	7.48	1.15	-0.0577	2.21	6.28	3.3	0.288	2.54	0.463	-0.487	0.82	1.08	14.8	9.56	-0.0827	-0.756	-4.78	-2.28
cg00706570	18	74692116	MBP;MBP;MBP;MBP;MBP	4155	2	blue	-1.48	20.3	10.7	14.5	-9.98	2.65	-5.98	-0.965	-7.54	-16.7	3.08	-10.7	0.749	-2.44	-0.333	9.94	1.17	3.21	-1.08	-7.56	-2.42	2.51	-8.78	1.52	4.68	2.4	1.2	-3.19	0.143	3.32	2.43	0.828	-0.751	-0.651	-2.34	0.726	0.336	13.4	7.67	-0.273	-1.85	-6.72	-3.73
cg00707445	16	87982141		NA	2	blue	0.0487	18	9.74	13.4	-6.51	2.57	-3.07	0.893	-5.11	-11.1	1.8	-7.94	2.77	-0.219	-0.946	10.2	0.878	4.13	0.631	-4.09	0.12	3.01	-5.25	4.62	2.16	5.04	2.79	0.386	1.43	3.46	3.47	0.295	0.7	-0.148	-1.15	0.337	0.959	10.6	8.03	0.0687	-0.806	-5	-1.93
cg00707881	14	77571003	KIAA1737	NA	2	blue	-2.29	23.3	13.4	17.4	-7.61	4.95	-5.05	0.964	-7.39	-12.5	4.5	-8.68	3.6	0.764	0.295	14.5	1.51	3.54	-1.13	-3.5	-1.3	3.48	-5.66	5.11	3.46	7.21	0.66	0.432	3.95	4.86	1.49	0.425	0.787	-0.643	-1.46	0.58	0.931	12.2	7.66	0.823	-0.662	-7.04	-3.09
cg00709423	7	150816834	AGAP3;AGAP3	116988	5	green	3.73	-5.77	-10.9	2.52	25.6	1.43	17.2	5	2.8	9.44	-0.309	-0.272	15.3	-3.59	4.02	-1.75	1.8	-5.05	4.94	11.1	3.95	0.869	3.2	4.32	0.63	1.78	0.371	0.899	0.843	1.34	3.99	2.95	0.311	2.33	1.65	-0.312	1.42	-5.99	1.62	4.05	0.931	2.35	5.83
cg00710180	2	95723453		NA	2	blue	-1.52	24.1	13.7	15.3	-10.2	3.85	-6.32	-0.0962	-6.77	-14.7	3.75	-9.09	1.44	0.0222	-0.0405	12.4	3.24	4.35	-1.36	-6.02	-1.53	1.26	-6.63	4.13	4.48	4.71	1.1	-0.665	1.91	4.35	-0.0176	-1.05	0.731	-0.119	-2.01	0.84	1.55	10.7	7.8	0.6	-1.2	-6	-4.52
cg00710862	2	85545908	TGOLN2	10618	2	blue	-2.93	18.1	13.7	11.5	-8.57	6.06	-6.23	-0.796	-5.24	-9.81	5.33	-5.12	1.47	3.15	-1.67	12.6	0.3	5.46	-2.02	-2.65	-2.59	5.48	-4.67	4.8	4.04	7.48	2.16	3.09	3.68	6.94	3.49	-0.32	2.36	0.806	-1.55	-0.57	0.757	13.5	6.63	-0.618	0.163	-2.82	-2.21
cg00711291	17	71345538	SDK2	54549	2	blue	-1.28	24.5	13.4	14.8	-11.2	3.33	-6.87	-0.553	-6.97	-16	2.81	-9.46	0.872	-0.256	-0.153	11.2	2.4	4.38	-1.47	-7.06	-1.22	1.53	-7.12	3.84	3.4	4.28	1.17	-0.477	0.927	4.1	0.503	-1.51	0.217	-1.02	-2.18	0.767	0.491	11.3	7.31	0.113	-1.42	-6.99	-4.77
cg00712510	10	71074350	HK1;HK1;HK1;HK1	3098	8	pink	6.05	2.47	1.73	2.84	4.38	0.702	6.94	21.4	5.46	3.76	-3.26	2.56	4.78	3.6	0.31	3.34	-0.267	4.91	14.8	4.43	10.7	0.975	10	7.36	-5.32	4.96	5.16	5.87	3.78	-4.34	4.27	13.3	1.32	1.58	1.33	3.11	-5.81	0.0645	0.96	0.53	1.51	-0.0107	2.07
cg00712627	10	80588621		NA	5	green	1.39	-9.25	-10.9	-2.05	17.3	0.674	11.9	3.75	2.8	10.2	-0.579	2.67	7.54	-2.25	2.55	-4.05	-1.65	-5.54	3.28	9.52	2.61	1.6	4.21	0.178	-1.49	0.22	-1.12	0.384	0.962	-0.743	3.12	4.56	0.602	2.04	1.69	0.077	-1.36	-5.25	-1.04	2.53	1.71	1.68	5.01
cg00712935	16	88443063		NA	2	blue	1.01	20.4	12.4	12.7	-10.6	0.736	-5.25	-0.845	-4.49	-14.6	1.34	-8.95	-0.464	-0.967	-0.857	9.71	4.27	5.81	0.0737	-8.16	-0.847	-0.257	-6.76	3.83	4.43	1.35	2.93	-1.61	0.953	2.58	1.04	-1.58	0.115	-0.0157	-2.68	0.227	0.209	10.3	7.29	-0.62	-1.39	-6.76	-4.97
cg00715122	8	59904538	TOX	9760	4	yellow	-0.702	16.9	8.62	18.2	-2.95	5.39	-0.959	1.4	-5.87	-8.93	3.8	-8.94	7.03	-0.899	1.85	12.4	3.18	2.38	-0.0189	-1.3	-0.0624	2.8	-5.15	5.24	5.03	6.04	1.04	-0.303	3.2	5.77	2.18	0.464	0.82	0.251	-1.49	1.05	1.02	9.23	8.8	2.46	-1.05	-6.51	-1.69
cg00716309	19	35719621	FAM187B;FAM187B	148109	2	blue	1.59	25.3	12.1	15.1	-9.51	1.36	-3.88	1.04	-4.73	-15.4	0.343	-9.75	1.14	-1.19	-0.839	10.9	3.07	6.07	1.43	-6.93	1.14	0.1	-6.21	4.26	2.54	3.05	3.61	-0.609	0.835	2.52	1.1	-0.757	-0.115	-0.946	-2.4	0.439	0.25	10.3	7.67	-1.43	-1.75	-7.03	-5.39
cg00717279	7	208985	FAM20C	56975	5	green	-0.578	-4.55	-8.19	3.3	18.2	4.56	10.8	2.93	-0.676	7.19	2.79	-0.712	14.3	-2.43	2.19	0.159	-1.78	-6.08	1.27	11.3	0.866	4.72	1.58	2.61	0.193	4.34	-0.919	0.784	2.23	3.49	4.53	3.51	0.358	0.807	1.19	-0.634	1.12	-1.8	1.96	2.67	0.618	1	6.22
cg00718336	3	99742090	C3orf26;FILIP1L;FILIP1L	NA	2	blue	-1.86	24	14.4	14.1	-10.6	4.44	-5.84	-0.801	-6.29	-14.4	4.21	-8.05	0.774	0.755	-1.15	13.4	0.867	5.85	-1.15	-5.02	-2.54	3.97	-6.85	3.82	3.98	5.55	2.4	0.318	3.01	5.34	3.09	-0.389	1.8	0.356	-1.25	0.326	1.13	14.6	8.27	-0.467	-0.571	-6.03	-3.22
cg00718883	8	26493115	DPYSL2	1808	4	yellow	-3.47	16.8	7.74	20	-3.49	6.32	-2.97	0.956	-9.51	-11.7	4.86	-11.8	6.82	-2.47	-0.179	12	-0.659	-0.00527	-1.68	-1.78	-1.52	5.11	-7.24	3.03	2.87	7.1	0.157	-1.75	2.51	5.14	2.68	1.95	-0.286	-0.779	-2.45	1.09	0.631	12	8.59	0.0182	-1.74	-6.36	-1.26
cg00719439	20	30409325	MYLK2	85366	2	blue	-2.63	13.9	18.2	7.78	-8.42	8.18	-6.58	-0.121	-2.32	-4.99	5.49	0.105	0.445	8.6	-0.255	15.3	1.58	7.86	-2.29	0.802	-1.84	4.6	-0.339	6.41	4.73	9.99	0.929	6.38	8.57	8.49	1.1	-1.41	3.98	1.49	0.152	0.946	1.21	9.43	4.42	0.767	1.61	-1.43	-1.36
cg00719626	19	15575685	RASAL3	64926	2	blue	-3.07	20.2	16.4	12.9	-10.5	6.08	-7.39	-0.243	-6.08	-11.3	5.02	-5.93	1.02	2.96	-0.961	14.4	1.7	5.04	-2.41	-3.55	-2.39	3.76	-4.78	4.17	5.03	6.81	1.04	2.11	4.58	6.02	1.21	-0.255	1.7	0.491	-1.07	0.605	1.46	12.4	6.78	0.386	0.41	-4.77	-2.45
cg00723041	22	42304331		NA	2	blue	-3.19	22.6	14.5	17.2	-7.37	6.8	-5.4	2.18	-7.39	-11.5	5.68	-7.55	4.09	1.95	-0.303	16.5	1.12	3.55	-0.874	-1.97	-1.45	4.56	-4.91	5.91	3.67	9.23	0.795	1.6	4.95	5.35	1.81	1.88	1.05	-0.134	-1.77	1.13	0.291	12.9	7.31	0.872	-0.765	-5.25	-2.24
cg00723137	18	77083734	ATP9B	374868	2	blue	-1.95	24.4	13.2	15.5	-10.2	3.67	-6.32	-0.146	-7.74	-16	3.4	-9.74	1.36	-0.423	-0.985	12.1	0.694	3.8	-1.19	-6.1	-1.72	3.04	-7.38	3.14	3.15	5.04	1.48	-0.639	1.57	3.9	1.71	0.28	0.122	-0.823	-2.66	0.586	0.285	13.8	7.6	-0.7	-1.74	-6.82	-4.1
cg00723379	15	75586717	GOLGA6D	653643	2	blue	-2.77	19.9	18.2	12.1	-10.1	6.32	-7.38	0.282	-5.01	-9.78	5.49	-4.12	1.08	4.9	-0.191	16.3	1.83	6.25	-1.87	-2.24	-2.18	3.92	-3.32	5.71	4.58	8.66	0.536	2.95	5.95	6.32	0.874	-0.509	2.73	0.887	-0.83	1.74	0.385	12.1	6.4	0.493	0.616	-2.79	-2.5
cg00724111	11	47209415	PACSIN3	29763	5	green	0.896	-10.9	-6.91	-4.91	16.1	4.14	9.8	3.26	6.16	18.2	1.6	8.86	7.33	4.03	2.25	-2.23	0.887	-1.85	2.04	15.6	2.04	1.79	8.38	3.1	1.39	3.18	-0.442	6.14	4.99	3.22	1.7	1.93	2.34	2.71	3.11	-1.17	1.37	-7.75	-3.63	3.41	3.19	7.98	6.73
cg00725138	22	19716556		NA	2	blue	-2.93	22.3	12.6	19.2	-6	6.54	-4.32	0.507	-8	-11.5	5.94	-8.92	5.39	0.799	-0.686	15.8	1.41	2.83	-1.64	-1.89	-2.27	4.99	-6.22	5.65	5	8.39	1.56	0.833	4.38	6.73	2.92	0.677	1.34	0.205	-1.19	0.384	1.51	13.7	9.75	0.162	0.0213	-5.22	-1.62
cg00725162	22	45018185		NA	4	yellow	-0.232	13.3	6.2	17.6	-0.937	4.75	0.391	2.59	-5.64	-7.7	3.01	-9.32	8.31	-1.9	0.485	11.1	2.34	0.958	0.815	-0.17	0.867	2.57	-4.54	5.01	3.26	5.9	1.95	-0.951	3.48	4.19	2.15	1.54	-0.349	-0.993	-1.79	1.28	-0.343	7.83	8.44	1.48	-1.72	-5.53	0.324
cg00725356	3	126074784	KLF15	28999	3	brown	-0.677	10.4	19.8	4.48	-10.8	3.55	-6.85	0.478	0.289	-4.16	2.12	1.92	-3.59	8.54	-0.604	12.8	4.23	9.44	-1.09	-1	0.0169	0.159	1.26	4.5	4.12	4.97	1.03	4.05	9.11	3.69	-2.05	-1.35	3.31	1.61	0.33	0.0411	0.488	6.03	2.52	0.822	1.95	-2.56	-3.28
cg00725401	8	70945169		NA	3	brown	-0.425	11.8	24.2	4.01	-11.2	4.96	-7.07	0.991	1.65	-3.31	3.22	3.8	-3.75	12.3	-0.949	14.2	4.34	13	-0.29	-0.0496	-0.26	1.55	2.53	7.06	4.93	7.18	2.39	7.12	10.9	5.55	-0.651	-1.34	4.15	1.44	1.11	1.42	0.0871	7.05	1.54	1.03	2.59	0.717	-2.62
cg00727590	22	31536549	PLA2G3	50487	3	brown	-0.743	10.4	19.8	4.77	-9.88	4.47	-6.23	0.537	0.353	-3.29	3.18	2.78	-2.5	10.2	-0.752	14.2	4.67	9.79	-1.21	0.334	-0.549	0.798	1.62	5.83	5.02	6.5	1.86	5.2	10.6	4.91	-1.67	-1.59	3.45	1.3	0.815	0.661	0.261	6.37	2.11	0.846	1.97	-0.985	-1.51
cg00728848	6	13483832	C6orf114;GFOD1	NA	5	green	0.187	-9.29	-11.7	-0.337	25	3.22	13.3	3.16	1.48	11.7	1.34	2.07	12.5	-2.14	3.91	-3.03	-0.82	-7.05	1.69	13	1.74	2.34	3.69	1.05	0.186	2.35	-2.29	0.967	1.47	1.92	2.44	3.14	-0.0701	1.13	1.72	0.263	0.442	-6.48	-1.12	4.41	0.967	3.78	6.57
cg00729275	18	24445134	AQP4;C18orf16	361	4	yellow	-1.91	15.1	6.67	20.3	-1.17	5.63	-0.139	1.88	-7.66	-9.49	4.22	-10.8	8.57	-2.4	1.25	12.7	1.11	0.166	-0.228	0.0528	-0.48	3.97	-6.1	4.52	3.59	6.79	0.596	-0.638	3.99	5	2.8	1.91	-1.28	-1.55	-3.56	-0.131	1.42	10.1	7.77	1.32	-2.6	-6.31	-0.919
cg00729654	20	31123895		NA	5	green	3.73	-7.18	-10.6	0.00634	20.5	0.378	15.1	4.69	3.77	10.4	-2.15	1.79	11	-2.19	3.23	-3.1	1.43	-4.29	4.43	10.5	5.3	-0.235	4.84	3.08	-0.655	0.812	0.34	2.48	0.988	0.266	2.19	2.4	0.35	2.28	2.1	-0.632	1.21	-7.39	0.244	2.9	1.47	3.36	5.73
cg00729699	8	21918075	EPB49;EPB49;EPB49;EPB49;EPB49;EPB49	NA	5	green	-0.361	-12.3	-12.5	-3.05	23	2.98	11.8	2.94	2.41	14.2	1.43	4.09	9.96	-1.09	2.82	-4.53	-1.53	-6.93	1.28	13.3	1.49	2.49	4.95	0.736	-0.744	2.1	-2.28	2.03	1.45	1.39	2.13	3.04	0.804	2.06	2.53	-0.291	0.589	-7.65	-2.29	3.34	1.6	5.34	7.39
cg00730172	1	91176405		NA	3	brown	0.281	4.45	10.8	3.59	-0.808	6.27	0.574	2.47	3.41	3.27	3.81	5.72	1.99	11.3	-0.785	12.9	4.65	8.15	0.826	8.11	0.97	2.29	4.78	8.97	5.13	8.51	2.88	9.3	17.5	6.83	0.784	-0.59	4.76	2.99	2.6	-1.34	-0.282	2.52	1.69	1.27	2.99	3.45	0.792
cg00730348	13	51482465	RNASEH2B;RNASEH2B	79621	8	pink	8.76	2.75	1.04	3.44	4.2	-1.68	8.36	18.9	6.29	2.81	-5.61	1.29	4.8	2.15	1.92	2.97	2.96	5.23	15.7	3.29	12.8	-2.56	8.88	8.16	-4.71	2.89	4.98	5.26	3.42	-5.39	1.8	8.62	0.474	1.22	0.743	1.7	-4.48	-2.69	1.34	1.29	0.532	-0.00155	1.58
cg00730832	10	123353465	FGFR2;FGFR2;FGFR2;FGFR2;FGFR2;FGFR2;FGFR2;FGFR2;FGFR2;FGFR2;FGFR2;FGFR2	2263	2	blue	2.17	18.6	10.2	14	-5.56	2.69	-0.838	2.06	-2.72	-9.93	1.62	-6.92	3.17	0.253	0.619	11.6	3.16	6.48	2.6	-3.06	1.07	1.45	-4.04	5.97	3.03	4.69	2.99	0.793	3.52	3.93	2.55	0.0904	1.51	0.69	0.086	1.31	0.953	9.15	7.57	0.682	0.108	-4.46	-2.95
cg00730857	4	1994281	WHSC2	NA	5	green	3.91	-4.08	-9.12	3.62	20.8	1.21	16	4.85	2.34	7.28	0.184	-1.38	14.2	-3.85	3.46	-0.589	2.23	-4.36	5.15	9.71	3.54	1.03	2.42	4.85	1.48	1.62	0.922	0.853	1.15	1.31	4.48	3.45	0.896	2.65	1.81	-0.0875	1.32	-3.79	3.01	3.6	1.54	-0.133	5.49
cg00731304	6	18458468	RNF144B	255488	2	blue	0.38	20.2	11.8	13.6	-8.62	3.61	-4.55	0.434	-4.33	-11.8	2.53	-7.58	1.63	0.35	-0.464	11.1	1.89	6.07	0.482	-5.21	-0.61	1.9	-5.34	4.05	3.57	4.02	2.88	-0.424	1.9	4.46	2.11	-0.448	0.114	-1.35	-2.05	2.66	-0.541	11.3	6.26	-0.278	-1.34	-5.57	-3.16
cg00732232	8	1265732		NA	5	green	-3.91	-8.18	-10.3	0.74	19.1	5.69	8.45	1.84	-1.78	9.56	4.63	1.04	13	-1.92	2.93	-1.91	-5.2	-9.07	-1.07	12.6	-1.49	7.11	1.8	-0.585	-0.647	4.85	-3.83	0.0632	1.57	3.32	4.49	4.51	0.247	0.935	1.58	-0.162	0.476	-2.67	-0.112	3.96	0.609	2.77	8.31
cg00732378	16	55021073		NA	2	blue	-0.118	21.5	14.5	11	-14.6	0.632	-8.46	-1.32	-5.1	-16.3	1.24	-7.9	-2.62	0.139	-1.73	9.63	3.13	5.98	-1.02	-9.51	-1.13	-0.548	-6.37	2.77	3.09	1.6	2.54	-0.842	0.402	1.87	-0.616	-2.1	0.00773	-0.778	-2.57	0.132	0.447	10.5	6.01	-2.11	-1.61	-6.57	-6
cg00732810	13	114875282	RASA3	22821	4	yellow	-1.08	17.3	8.14	15	-6.69	1.51	-3.08	0.0225	-7.63	-14.7	3.06	-11.6	2.1	-3.7	-0.097	9.84	1.08	1.56	-0.0736	-5.65	-2.07	2.57	-8.53	2.7	3.46	2.54	1.29	-3.04	0.926	1.9	3.33	1.77	-1.79	-0.933	-3.35	-0.38	0.202	12.9	7.77	-0.323	-1.91	-9.63	-3.69
cg00732815	20	44636981	MMP9	4318	3	brown	-1.52	9.54	19.2	2.82	-10.5	4.97	-7.33	0.809	0.835	-3.36	3.19	4.07	-4.28	11.5	-0.843	12.1	2.72	10.9	-0.931	0.291	-0.551	2.03	2.16	5.34	3.52	7.13	1.27	7.28	10.8	4.9	-1.04	-0.686	3.58	1.32	0.792	0.738	-0.37	6.62	0.929	0.986	2.28	0.935	-1.25
cg00733493	7	45126655	NACAD	23148	4	yellow	-4.42	14	6.41	19	-2.26	6.56	-2.43	0.882	-10.2	-10.6	5.47	-10.9	7.8	-2.62	0.761	12.2	-1.53	-1.7	-2.23	-0.468	-2.06	5.88	-7.08	2.62	2.52	7.64	-0.897	-1.96	3.52	5.14	2.93	2.43	0.382	-0.726	-0.617	0.072	0.835	11.5	9.41	1.45	-0.821	-7.12	0.335
cg00733786	14	54795898		NA	3	brown	-2.73	16.1	24.2	7.3	-13	6.33	-9.19	0.323	-2.1	-7.38	4.69	-0.00451	-2.65	8.62	-0.435	15	2.28	9.32	-1.89	-1.68	-1.67	3.21	-0.635	5.51	4.24	8.29	0.502	5.33	7.65	6.02	-0.217	-0.757	3.71	1.4	0.124	1.51	0.936	10	3.89	1.25	1.77	-2.26	-2.64
cg00734592	7	138793064	ZC3HAV1;ZC3HAV1	56829	3	brown	0.985	12	21.8	3.9	-11.4	3.31	-6.4	1.3	2.48	-3.27	1.92	3.5	-4.15	10.9	-0.264	12.6	5.18	12.8	0.814	-1.04	0.716	0.302	2.77	7.2	4.79	5.42	2.66	7	8.99	4.43	-0.636	-1.29	3.14	1.27	0.527	1.1	0.391	6.12	1.63	0.98	2.48	0.235	-2.78
cg00734666	3	47454929	PTPN23	25930	4	yellow	-2.77	21.1	12.4	19.3	-5.79	6.31	-3.55	1.12	-7.82	-11.8	5.38	-9.04	5.21	0.207	0.314	16.5	1.19	2.46	-1.18	-1.47	-1.73	4.54	-6.26	4.87	4.53	7.87	0.732	0.177	5.29	5.84	2.53	1.32	0.443	-0.653	-1.94	-0.0148	0.66	13	8.08	1.23	-1.63	-6.68	-2.23
cg00735329	18	74732603	MBP;MBP	4155	2	blue	-3.63	23.9	13.4	16.2	-10.3	5.05	-7.11	-0.9	-9.2	-16.5	4.87	-10.2	1.7	-0.624	-1.49	13.1	-0.149	2.85	-2.59	-5.46	-3.01	4.38	-8.37	2.6	3.3	5.88	1.06	-1.27	2.1	4.92	2.18	0.264	0.48	-0.831	-1.75	0.569	0.479	15	8.26	-0.71	-1.29	-7.01	-3.56
cg00736707	7	1119827	C7orf50;C7orf50;C7orf50	84310	5	green	3.07	-4.88	-9.32	2.52	18.4	0.909	13.9	4.26	1.67	7.26	-0.796	-0.806	12.4	-3.56	3.32	-1.26	0.695	-4.75	4.1	9.2	3.78	0.878	2.46	3.28	-0.677	1.5	0.52	0.134	1.42	0.67	3.36	2.62	-0.426	0.598	0.914	-0.0738	0.161	-4.4	1.1	2.97	0.0684	1.09	4.98
cg00737992	20	55098859	GCNT7;C20orf106	140687	22	darkgreen	-8.41	0.255	-0.476	2.44	2.37	8.16	-1.5	-1.03	-5.14	0.14	8.29	-0.562	4.19	0.719	-2.24	2.25	-13.8	-3.52	-3.1	4.19	-6.8	20.9	-2.37	-1.92	-0.476	7.71	-1.06	-0.19	1.66	5.68	13.4	7.75	1.97	0.402	2.47	1.39	0.386	10.7	2.44	-0.368	2.61	0.34	5.94
cg00738345	17	55940530	CUEDC1	404093	2	blue	-1.79	27.2	14.6	16.5	-10.2	4.66	-5.99	-0.305	-7.18	-15.2	4.11	-9.27	1.91	0.216	-0.445	13.8	2.55	4.53	-1.44	-5.32	-1.75	2.64	-6.98	4.92	4.49	5.67	1.77	0.278	2.48	5.32	1.54	-1	1.16	-0.109	-1.29	0.484	1.31	12.6	8.61	0.238	-0.706	-6.33	-3.34
cg00741523	10	31236948	ZNF438;ZNF438;ZNF438;ZNF438;ZNF438;ZNF438;ZNF438;ZNF438	220929	8	pink	8.57	0.982	-0.755	1.39	5.1	-2.29	8.79	19.3	6.66	3.7	-6.14	2.28	4.02	1.9	0.77	0.739	1.24	4.36	16.5	3.27	12.9	-2.21	9.85	7.1	-6.36	2.28	5.22	5.45	1.75	-6.48	2.26	9.83	0.184	1.12	1.38	1.53	-4.85	-3	0.18	-0.599	1.26	0.0819	0.728
cg00741695	6	961559	LOC285768;LOC285768	285768	2	blue	-0.0946	23.3	12.9	15.1	-9.47	3.76	-4.94	-0.0877	-5.46	-14	2.96	-8.88	1.59	-0.271	-0.424	11.8	2.56	5.45	-0.215	-5.92	-1.11	2.11	-6.52	3.77	4.87	4.01	2.78	-0.76	1.71	4.79	2.26	-0.296	0.276	0.0441	-2.21	1.53	0.53	12.1	7.08	0.358	-1.17	-6.29	-3.37
cg00742240	X	153287830	MECP2	4204	2	blue	-1.05	21.7	14.4	13.3	-10.1	3.88	-5.54	0.18	-5.12	-12.9	3.05	-6.89	0.781	1.47	-0.787	13	1.88	5.81	-0.537	-4.77	-1.05	2.78	-5.41	4.63	3.52	5.45	2.35	0.821	3.36	4.56	1.83	-0.248	0.975	-0.105	-1.47	0.458	0.712	12.3	6.73	-0.328	-0.734	-5.85	-3.88
cg00743629	13	54082429		NA	2	blue	2.07	19	11.4	12.3	-8.12	1.53	-3.27	1.57	-2.7	-10.7	0.69	-6.89	1.18	0.3	0.0827	10.4	2.38	7.17	2.25	-5.13	1.19	1.48	-3.84	4.79	3.45	3.23	3.44	0.497	2.16	2.72	3.1	0.656	0.882	1.3	-1.75	-0.373	0.173	10.4	7.16	-0.383	-0.584	-4.61	-3.29
cg00744433	21	18884067	CXADR	1525	5	green	3.1	-7.43	-10.6	-0.302	17.7	-0.0101	13.7	4.85	3.06	9.04	-2.21	1.11	9.57	-3.13	2.38	-3.38	0.248	-4.6	4.23	9.02	4.86	-0.359	4.18	0.873	-1.72	0.17	0.233	0.245	0.706	-1.09	1.6	3.34	-0.384	1.41	1.46	0.159	-0.632	-6.76	-0.405	1.97	0.547	2.75	6.47
cg00744495	9	138710327	CAMSAP1	157922	8	pink	3.16	0.743	0.264	1.24	4.08	0.67	4.47	17.6	3.3	3.25	-2.39	2.38	3.68	3.06	0.84	1.73	-2.41	2.54	11.2	4.32	8.52	1.7	8.91	5.08	-6.96	5.57	2.2	4.98	2.71	-5.16	2.33	12.7	0.9	1.13	1.76	1.92	-5.53	-0.688	-0.697	0.107	1.46	0.276	2.09
cg00744524	6	44239416	TMEM151B	441151	5	green	1.44	-10.6	-17.2	-1.47	22.1	-0.591	13.4	3.19	1.25	9.16	-0.79	-0.159	9.75	-6.03	2.43	-7.19	-1.22	-8.87	3.04	7.67	2.07	0.654	1.84	-1.15	-1.14	-1.84	-0.972	-2.01	-2.81	-1.85	2.92	4.46	-1.18	0.885	1.13	-0.516	0.243	-6.56	-0.3	1.94	0.223	2.29	5.52
cg00748072	2	174862824		NA	10	purple	0.922	-8.92	-2.72	-8.22	8.2	2.9	4.38	2.81	8.16	17.2	0.732	13.8	2.14	8.67	2.32	-3.14	-0.893	2.08	1.96	10.4	2.17	2.59	11.8	2.73	-1.17	3.61	-0.95	7.15	3.55	2.37	1.79	1.47	4.25	3.58	4.55	1.21	0.798	-6.05	-4.55	2.87	5	8.28	5.09
cg00748432	22	18042722	SLC25A18	83733	4	yellow	-2.73	17.4	10.6	16.1	-6.48	5.42	-4.56	0.15	-7.75	-11.9	4.21	-9.08	3.87	-0.555	-0.205	13.1	1.32	1.93	-2.03	-2.8	-1.55	2.84	-6.43	3.41	3.61	5.95	0.469	-0.887	3.51	4.94	0.697	-0.313	-0.716	-1.92	-2.78	-1.09	0.816	10.3	6.74	0.26	-2.77	-6.02	-2.4
cg00748640	16	19886655	GPRC5B	51704	2	blue	1.59	20.9	12.3	13.1	-9.35	1.3	-3.65	2.24	-3.68	-13.4	0.233	-7.74	0.571	0.0411	-0.662	10.8	1.48	6.4	2.46	-6.08	1.36	1.22	-4.6	4.25	1.15	3.54	3.7	-0.247	1.95	1.49	2.41	1.1	0.438	-0.433	-1.43	0.693	-0.737	10.9	7.42	-0.823	-0.804	-6.78	-3.84
cg00750225	6	1664673	GMDS	2762	2	blue	-3.4	23.9	13.3	15.3	-11.4	4.11	-8.08	-0.886	-9.18	-17.1	3.99	-10.2	1.1	-0.651	-0.769	11.8	0.642	2.63	-2.77	-6.66	-2.54	2.93	-8.11	2.34	3.23	5.15	0.289	-1.48	1.16	4.05	0.56	-0.353	0.233	-0.684	-1.77	0.628	0.551	12.9	7.82	-0.408	-1.35	-6.76	-3.78
cg00750880	17	75681168		NA	7	black	6.82	-7.51	-13.4	-1.08	16.8	-3.8	17.1	5.17	5	7.51	-4.84	-0.316	7.78	-5.93	2.65	-6.02	1.38	-4.18	7.58	5.3	6.03	-2.41	3.24	1.23	-2.08	-3.7	2.38	-0.684	-2.51	-3.66	3.27	3.39	-2.09	0.622	-0.213	-1.42	-1.02	-7.46	-0.276	1.55	-1.28	1.7	4.09
cg00750917	8	139507782	FAM135B	51059	5	green	-2.1	-7.7	-9.75	-0.51	17.9	4.39	8.33	3.65	-0.304	10.3	2.64	2.65	11.2	-0.704	2.72	-2.95	-3.68	-7.32	0.731	10.8	1.03	5.17	4.3	1.47	-1.74	4.95	-2.78	2.24	0.364	1.94	3.46	4.54	1.78	1.61	3.3	0.584	0.336	-3.94	0.542	3.46	1.72	3.77	7.3
cg00751332	18	20714332	CABLES1;CABLES1	91768	5	green	5.38	-8.78	-12.6	-1.53	20.4	-1.06	16.2	4.8	5.04	11.2	-3.53	2.06	9.65	-3.14	4.1	-5.26	3.14	-4.21	5.17	8.66	5.97	-2.75	5.14	2.31	-0.88	-1.39	0.182	0.961	-0.874	-1.13	0.381	1.41	-0.236	1.81	1.67	0.117	0.327	-10.4	-1.3	3.36	0.607	3.61	4.92
cg00753747	16	22201766		NA	30	steelblue	-3.29	3.99	4.84	5.16	0.325	10.3	-1.11	-6.67	-1.58	0.345	8.37	0.0531	4.7	3.82	2.36	7.13	3.18	1.79	-6.32	5.05	-5.58	4.78	-2.93	3.3	10.7	5.68	-1.66	3.19	5.84	17.8	2.15	-6.19	4.11	3.29	1.5	-0.934	6.43	3.74	3.75	4.37	2.78	2.16	1.96
cg00754896	17	76227255	LOC283999	NA	2	blue	-2.03	19.9	10.6	13.3	-11.1	2.04	-6.9	-0.817	-8.29	-18	2.13	-10.9	-0.124	-2.43	-1.3	9.37	1.1	2.45	-1.68	-8.02	-1.56	1.39	-8.43	1.46	2.69	2.64	1.41	-2.67	-0.342	2.19	0.542	-0.115	-0.324	-1.24	-2.47	-0.73	0.834	11.7	7.5	-1.31	-2.77	-7.29	-4.91
cg00755063	19	13275288		NA	3	brown	-0.966	16	22.7	6.2	-15.9	3.56	-10.2	-0.637	-1.48	-8.7	2.68	-0.858	-4.5	6.9	-1.3	12.4	3.65	10	-1.59	-4.86	-1.09	0.452	-1.33	4.38	3.88	4.71	1.9	3.44	5.14	4.25	-1.54	-2.46	2.56	0.671	-0.484	1.07	0.393	8.47	3.5	-0.345	0.73	-2.04	-5.14
cg00755950	2	69910490		NA	3	brown	-2.24	12.8	21	5.52	-11.5	7.11	-8.36	0.0246	-0.937	-5.18	4.38	1.52	-2.8	9.72	-1.72	13.5	1.3	9.93	-1.92	-0.699	-1.54	3.73	0.602	5.25	3.65	8.2	1.76	5.93	8.31	6.83	0.717	-1.14	3.73	1.31	0.96	1.17	0.265	8.78	2.38	0.646	2.2	-1.19	-1.65
cg00756450	15	49517594	GALK2;GALK2	2585	8	pink	1.94	0.426	-0.771	3.32	7.02	2.96	5.98	19.3	1.47	4.45	-0.751	1.31	7.85	2.15	1.67	2.6	-1.79	-0.0971	9.86	6.29	8	1.83	8.55	5.18	-5.5	6.43	1.02	4.07	3.38	-4.01	1.88	13.3	0.322	1.06	0.853	2.73	-6.11	-1.65	-0.225	1.84	0.501	-0.214	2.73
cg00757262	17	17747898	TOM1L2;TOM1L2	146691	2	blue	-2.99	25	13.4	16.7	-9.59	5.05	-6.35	-0.309	-8.47	-15.4	5.43	-9.88	2.31	-0.127	-1	13.3	0.805	3.3	-1.73	-5.27	-3.14	4.21	-7.84	4.17	3.98	6.25	1.28	-0.611	2.18	5.12	2.56	0.38	0.856	-0.331	-1.45	0.931	0.758	14.7	8.62	-0.562	-0.611	-7.06	-3.74
cg00760014	1	19267827	IFFO2	126917	4	yellow	-2.11	20.1	14	14.6	-7.65	5.88	-4.08	1.13	-5.44	-11	4.64	-6.58	2.48	1.73	0.131	15.2	1.67	5.2	-0.346	-2.28	-1.32	4.19	-4.9	5.19	4.57	6.81	1.52	1.74	5.23	5.56	2.95	1.26	1.51	0.688	-1.26	0.997	0.372	13	7.38	1.24	0.154	-5.8	-2.63
cg00760812	14	32170077	NUBPL	80224	8	pink	1.43	-0.816	-2.38	0.776	4.31	-1.02	4.01	14.8	1.03	2.08	-1.66	0.651	2.94	-0.28	-0.236	-0.519	-5.89	-0.817	9.73	2.32	5.63	3.7	6.11	1.47	-7.08	2.82	1.45	1.35	0.0705	-7.68	5.42	19.8	-0.435	0.656	1.56	1.84	-6.11	1.75	0.0299	-0.828	1.3	-0.368	3.36
cg00760872	13	33514837		NA	3	brown	-3.6	14.4	20	6.43	-14.6	5.41	-11.2	-1.19	-3.53	-8.61	4.46	-1.17	-3.42	6.83	-1.36	12.3	1.33	7.7	-3.37	-3.62	-2.68	2.8	-2.03	3.28	3.34	6.53	0.181	2.95	5.44	5.31	-1.03	-1.63	1.35	-0.507	-1.5	1.67	0.118	9.92	2.18	-0.0935	-0.065	-1.63	-3.83
cg00765233	2	235877260	SH3BP4	23677	2	blue	-2.37	19.8	9.72	15.9	-6.85	4.22	-4.59	0.488	-8.12	-13.4	3.74	-10.1	3.68	-1.29	0.386	10.9	0.312	1.94	-1.24	-4.35	-1.32	3.45	-6.75	3.38	2.53	5.85	0.499	-1.11	1.13	4.11	1.82	0.7	-0.192	-1.49	-1.19	1.34	1.05	11.7	7.63	0.101	-0.71	-6.49	-2.76
cg00765922	1	156626839	BCAN	63827	10	purple	2.4	-14.9	-8.4	-9.25	14.2	0.851	8.38	2.78	8.74	22.3	-0.837	11.4	3.73	4.32	3.25	-5.98	0.751	-1.2	2.53	11.5	2.91	-0.0856	10.6	1.85	-0.888	0.445	-1.13	4.76	2.52	0.555	0.57	0.974	2.71	2.72	3.58	0.55	0.316	-10.8	-4.92	3.49	3.83	8.62	5.88
cg00768158	X	49054690	SYP	6855	4	yellow	-3.14	13.1	6.51	17.6	-1.59	6.92	-1.54	1.13	-7.92	-8.47	5.44	-9.47	8	-1.54	3.05	11.7	0.954	-0.26	-1.7	0.23	-1.39	4.59	-5.67	4.19	4.51	7.5	-2.07	-0.267	3.56	6.3	2.09	1.25	0.951	0.941	-1.2	-0.598	1.11	9.23	7.72	3.61	-0.86	-4.67	0.677
cg00768423	12	131324206	STX2;STX2	2054	30	steelblue	-4.76	3.52	5.46	4.8	-0.268	10.5	-1.92	-6.68	-2.17	0.435	9.51	0.791	4.15	4.72	1.87	8.03	1.79	1.56	-6.98	5.36	-7.17	6.86	-2.95	2.96	11.1	6.41	-1.91	2.89	7.4	17.1	3.53	-4.58	3.26	1.99	1.32	0.0903	4.79	5.37	2.8	4.64	2.55	1.57	2.54
cg00769112	19	3981163	EEF2	1938	5	green	0.263	-3.91	-8.66	4.12	19.3	3.64	11.8	4.46	-0.547	6.69	2.64	-1.54	15.8	-3.24	3.74	-0.205	-0.901	-6.46	2.54	10.5	1.58	3.73	1.79	3.29	0.155	4.39	-1.44	0.296	0.355	2.31	4.41	4.41	-0.0687	2.01	0.521	0.0787	0.331	-2.77	1.57	3.62	0.67	0.266	4.99
cg00769305	1	6303279	HES3	390992	3	brown	-0.0894	14.6	20	7.23	-9.42	5.36	-5.65	1.42	0.085	-4.92	3.71	0.661	-1.01	8.93	0.799	14.5	4.39	10.4	0.164	-0.345	-0.002	1.95	1.11	7.97	5.09	7.88	1.65	6.81	8.24	6.28	0.308	-1.13	4.74	2.46	1.18	0.348	1.39	7.92	4.65	1.36	2.82	-1.07	-1.94
cg00770158	3	57134628	IL17RD	54756	2	blue	-3.47	17.5	21	10.2	-11.2	6.54	-8.8	-0.0183	-4.35	-8.29	5.42	-2.48	-0.147	6.29	-0.367	16.2	2.69	6.78	-2.79	-2.01	-2.22	3.09	-2.29	5.16	5.34	8.12	0.268	3.05	6.79	6.33	-0.495	-0.768	1.85	0.106	-1.19	1.1	1.44	10.6	4.37	1.17	0.732	-3.34	-2.76
cg00770316	2	146509846		NA	10	purple	2.82	-9.42	-2.78	-9.64	7.17	1.46	4.71	2.63	10.2	17.5	-0.351	14.1	0.661	8.25	1.67	-4.37	0.533	3.45	2.98	8.75	2.49	0.41	11.7	2.82	-0.992	1.42	0.323	6.06	2.37	1.48	1.2	0.387	4.66	3.62	5.01	1.55	-0.178	-7.55	-4.41	2.17	5.32	9.63	3.83
cg00770754	16	89440949	ANKRD11	29123	4	yellow	-2	18.4	10.5	17.3	-5.94	4.7	-2.93	1.36	-7.24	-12.7	3.55	-9.7	4.31	-1.1	-0.245	13.6	0.91	2.16	-0.523	-2.66	-0.766	3.39	-6.4	3.48	2.88	6	1.4	-0.646	3.82	3.83	2.09	1.55	-0.547	-1.43	-2.79	0.45	-0.433	11.8	7.78	0.494	-2.2	-7.7	-1.28
cg00771346	3	69230212	FRMD4B	23150	2	blue	-2.84	24.6	13.4	15.6	-10.3	4.46	-6.7	-0.624	-8.34	-16.2	4.52	-9.76	1.51	-0.307	-0.49	12.9	1.15	3.44	-1.99	-5.62	-2.59	3.23	-7.8	3.99	3.89	5.58	0.694	-0.0657	1.99	4.85	1.55	-0.5	0.151	-1.01	-1.91	0.636	0.948	13.1	7.54	-0.175	-1.24	-7.11	-3.77
cg00771653	22	24111337	CHCHD10	400916	8	pink	3.82	1.94	2.03	2.97	4.38	1.81	5.04	20.7	3.41	4.13	-2.48	2.87	5.69	4.62	1.73	4.3	0.198	3.32	11.3	5.93	10.4	0.381	10.6	7.51	-6.07	7.24	1.7	6.3	5.35	-4.09	0.429	10.7	0.916	0.973	1.36	2.97	-4.66	-1.8	-0.346	1.14	1.26	-0.031	2.41
cg00772991	2	220716794		NA	3	brown	-1.37	18.5	17.6	11.1	-9.88	4.86	-5.87	0.659	-3.45	-9.17	3.91	-3.67	0.482	4.49	-0.128	14.8	2.18	7.19	-0.695	-2.76	-1.06	3.01	-2.63	4.89	4.04	6.77	1.57	1.99	5.76	5.19	1.34	-0.135	2.51	0.728	-1.31	0.332	0.469	11.1	5.65	0.753	0.304	-3.88	-2.86
cg00774867	1	3120245	PRDM16;PRDM16	63976	8	pink	2	0.689	1.05	2.16	5.54	2.73	4.9	20.6	2.75	4.9	-1.07	3.37	5.77	4.65	1.48	3.54	-1.02	1.83	9.86	6.82	8.78	1.42	10.5	6.64	-6.15	7.67	0.98	6.12	4.95	-4.2	0.625	12.7	1.11	0.638	1.58	2.9	-5.41	-1.56	-0.934	1.76	1.16	-0.197	2
cg00774999	8	145115907	OPLAH	26873	3	brown	0.422	14	23.8	6.65	-10.5	4.21	-5.55	1.95	1.02	-4.65	2.62	1.64	-2.36	9.77	0.373	16.4	4.95	11.8	0.712	-0.152	0.691	1.02	1.83	8.02	4.68	7.07	2.1	6.45	11.1	4.77	-0.302	-0.86	3.54	1.93	0.777	1.48	0.192	7.24	2.96	1.77	3.03	-1.91	-2.26
cg00775388	7	63667718	ZNF735	730291	22	darkgreen	-10.8	2.26	2.39	4.16	1.03	10.7	-3.61	-1.9	-6.71	-0.418	12.5	-0.555	4.67	2.61	-0.636	5.26	-11.3	-3.08	-5.11	4.94	-9.13	24.8	-2.67	0.0679	2.48	10.5	-2.92	1.1	4.04	8.49	12.6	6.44	3.85	1.92	2.94	1.07	0.99	12.9	3.94	1.78	3.35	-0.334	5.12
cg00775818	19	2431171	LMNB2	84823	5	green	1.2	-8.17	-10.9	-0.177	22.4	2.74	13.6	4.11	2.45	10.9	1.32	1.83	11.7	-1.96	1.94	-2.65	-1.77	-5.47	3.39	12.1	2.02	3.55	3.99	2.35	-0.626	2.64	0.344	1.91	1.54	1.73	5.06	4.26	0.905	1.88	2.47	-0.399	0.703	-4.63	0.297	1.91	1.94	4.08	7.89
cg00775939	10	118301448		NA	7	black	3.55	-6.66	-10.3	0.257	19.7	0.757	16.1	6.12	4.12	9.68	-1.28	1.62	10.6	-2.54	1.96	-2.61	-1.9	-3.71	6.42	10.2	4.29	2.8	4.66	2.32	-2.24	1.56	1.67	1.49	0.916	-0.492	6.38	5.98	0.634	1.88	2.62	-0.668	-0.512	-4.02	0.948	1.37	1.62	1.66	6.32
cg00776364	16	28878700	SH2B1;SH2B1;SH2B1;SH2B1;SH2B1	25970	2	blue	-3.56	18.4	10.8	11.9	-11.3	3.01	-7.9	-2.15	-8.71	-16.5	3.74	-9.42	-0.526	-1.38	-2.15	9.42	-1.77	2.34	-2.86	-7.09	-3.58	4.58	-8.71	0.676	2.29	3.7	1.12	-2.43	0.242	3.32	2.98	0.662	-0.0515	-1.75	-1.61	-0.0252	-0.277	16.2	7.61	-2.01	-1.1	-7.32	-3.88
cg00776427	4	85258738		NA	8	pink	6.34	2.71	2.51	3.09	4.16	1.17	6.35	17.3	5.6	4.15	-2.38	3.04	5.31	4.51	2.89	4.4	3.9	5.54	12.2	5.16	9.88	-1.19	9.65	9.34	-1.65	5.02	2.99	6.87	5.31	-2.55	1.26	8.4	2.05	3.21	1.74	1.7	-3.44	-2.01	0.672	1.95	1.9	1.99	1.46
cg00777198	12	52828273	KRT75	9119	2	blue	-4.61	19.3	13.1	17	-6.14	8.43	-5.27	0.091	-7.93	-9.92	7.28	-7.03	5.06	2.33	-0.996	16.2	-0.213	2.81	-2.74	-0.916	-3.54	6.73	-5.52	5.16	4.42	9.91	0.93	0.959	5.42	7.77	3.48	0.823	1.93	-0.272	-0.627	1.36	1.11	13.8	8.57	0.415	0.384	-4.8	-1.44
cg00778928	2	128380062	MYO7B	4648	3	brown	-2.84	16.4	19	9.32	-9.78	7.06	-7.33	0.249	-3.08	-7.2	5.88	-1.4	0.151	7.28	-0.52	15.7	1.76	8.01	-1.63	-1.02	-2.41	4.89	-1.7	6.17	5.36	9.12	1.33	4.43	7.38	7.39	1.97	0.0311	3.27	0.896	-0.147	0.306	1.65	12.1	4.96	1.37	1.87	-1.72	-1.4
cg00779565	1	2845139		NA	5	green	1.07	-9.74	-9.38	-2.22	22.5	3	12.9	6.39	4.22	14.8	0.763	5.24	10.4	0.966	3.42	-2.53	-0.694	-4.17	3.93	15	3.78	2.5	7.82	3.09	-1.15	3.81	-1.54	3.81	3.16	0.667	2.62	5.44	1.44	2.67	2.99	1.19	-0.642	-6.79	-2.16	4.09	2.94	4.86	7.19
cg00781388	16	86995081		NA	5	green	4.91	-7.62	-9.96	-0.952	20.9	0.598	16.4	4.93	5.83	12.4	-1.61	3.51	10.4	-0.983	3.34	-2.97	1.99	-2.69	5.51	11.2	5.01	-0.0139	5.93	4.29	-0.138	1.09	1.24	2.8	1.39	0.995	3.4	2.31	1.42	2.87	3.31	0.401	1.03	-7.54	0.123	2.95	2.79	4.56	6.59
cg00781749	14	99532893		NA	2	blue	0.29	17.9	11.8	14.5	-5.17	5.15	-1.94	2.34	-3.81	-8.57	3.71	-5.75	4.46	2.5	-0.893	14.2	4.23	5.26	1.1	-1.17	0.277	2.1	-3.13	8.8	4.69	7.58	3.69	3.62	5.62	5.76	1.89	-0.287	2.02	0.195	-0.553	0.472	1.38	8.86	7.16	0.165	-0.296	-5.38	-3.03
cg00782811	6	46293734	RCAN2	10231	4	yellow	-0.944	19.5	11.6	17.3	-5.83	5.15	-2.87	1.58	-5.75	-11	3.66	-8.51	4.27	0.0377	0.00932	14.3	2	3.98	0.21	-2.08	-0.344	3.1	-5.2	5.01	4.02	6.25	1.93	0.673	4.34	5.1	2.38	1.14	0.22	-0.196	-2.27	0.519	0.279	11.1	7.85	0.455	-1.3	-6.23	-2.31
cg00784654	1	1502751	SSU72	29101	2	blue	2.73	21.9	11.9	13.8	-8.45	1.36	-2.8	1.74	-2.79	-12.3	0.0633	-7.78	1.25	-0.165	-0.233	11	2.39	7.31	2.64	-5.67	1.73	0.941	-4.44	4.73	2.18	3.29	4.12	0.13	1.71	2.57	2.77	0.0395	0.36	-0.156	-2.1	0.787	-0.603	10.4	7.25	-0.417	-1.65	-6.25	-3.93
cg00784882	19	54713372		NA	3	brown	-1.26	13.7	18.9	6.82	-8.42	6.16	-5.6	2.58	-0.357	-4.22	5.12	1.48	-0.453	9.84	-0.672	14.7	2.52	9.87	0.624	0.53	-0.548	3.94	1.56	8.85	3.89	9.99	2.3	6.81	8.58	5.9	1.77	0.775	5.24	2.12	1.75	2.84	0.413	8.98	4.18	1.35	3	0.00751	-1.21
cg00785980	13	32984237	N4BP2L1;N4BP2L1	90634	3	brown	0.626	17.2	19.9	9.59	-8.41	5.01	-4.74	2.65	-0.578	-5.53	3.03	-0.621	0.766	7.97	-0.679	16.4	5.17	10.3	1.24	-0.693	1.09	1.21	0.586	9.66	4.19	7.94	3.99	5.84	8.27	5.27	0.295	-0.879	3.61	1.06	-0.00604	1.5	-0.305	8.14	5.26	0.145	1.35	-0.957	-3.25
cg00786909	1	227163427	CABC1	NA	2	blue	-0.532	24.2	12.5	16.3	-8.99	3.77	-4.63	-0.181	-6.28	-14.7	2.9	-9.82	2.13	-0.776	-0.768	12.4	2.36	4.7	-0.443	-5.5	-0.959	2.2	-7.16	4.07	4.42	4.37	2.58	-0.47	2.01	4.91	2.06	-0.548	1.02	-0.18	-1.25	0.603	1.16	12.2	8.83	-0.0992	-0.691	-6.31	-3.33
cg00788170	1	227921688	SNAP47;LOC100130093;JMJD4;JMJD4;LOC100130093	NA	4	yellow	-1.56	20.3	11.1	18.2	-4.54	6.07	-2.7	1.29	-6.42	-9.88	4.78	-7.92	6.17	1.19	0.143	14.9	2.2	3.28	-0.506	-1.02	-0.857	4.06	-4.9	7.68	4.25	8.75	1.67	2.11	4.29	6.57	2.74	-0.0923	1.19	-0.347	-0.951	0.855	1.96	11	8.77	0.986	-0.436	-5.16	-1.74
cg00788699	1	3680420	CCDC27	148870	3	brown	-3.68	11.3	17.5	4.52	-11.6	4.88	-9.43	-0.327	-2.14	-5.87	4.45	1.19	-3.64	8.57	-1.8	11.6	-0.0731	7.69	-2.5	-1.56	-2.41	4.42	-0.123	4.26	2.75	7.51	0.441	4.57	7.54	4.82	0.843	-0.000188	3.67	1.33	0.974	0.571	0.894	10	2.96	-0.336	2.49	-1.5	-1.91
cg00790020	8	1765477		NA	10	purple	2.58	-13.5	-5.89	-9.69	12.4	1.05	8.42	3.48	10.1	22.7	-0.325	14.1	2.47	6.48	2.26	-4	1.68	0.482	3.24	12.8	2.92	-0.253	12.1	2.76	0.2	1.05	-0.387	6.87	5.02	0.611	0.453	1.65	3.19	3.8	4.05	0.609	-0.0479	-9.69	-5.5	3.05	5.02	9.17	5.79
cg00790071	2	102731407		NA	3	brown	-4.01	12.5	18.3	5.77	-10.8	6.49	-8.84	-0.544	-2.68	-6.19	5.21	0.471	-2.47	8.54	-1.82	13.1	0.184	7.89	-2.99	-0.517	-2.54	4.77	-0.699	4.36	3.58	8.48	0.453	5.62	8.93	6.26	0.702	-0.377	3.71	1.05	0.781	0.769	0.823	10.3	3.29	0.274	2	-0.425	-0.364
cg00790535	4	103482058	NFKB1;NFKB1	4790	2	blue	-2.73	23.4	13.8	15.3	-10.6	4.74	-6.72	-0.105	-7.75	-15.7	4.26	-9.3	1.2	-0.197	-0.752	13	0.18	3.83	-1.51	-5.5	-2.37	4.11	-7.25	2.79	3.49	5.48	1.07	-0.999	2.28	4.51	2.49	1.02	0.301	-0.557	-2.31	0.759	0.979	15.1	7.84	-0.314	-1.2	-7.02	-3.83
cg00790847	12	40497575	SLC2A13	114134	5	green	2.84	-5.47	-11.1	1.83	18.7	1.41	14	2.55	2.29	8.03	0.31	-0.867	12.6	-4.23	2.78	-3.22	0.09	-5.14	3.43	8.2	2	2.06	1.51	2.15	0.347	0.731	0.809	0.404	-1.51	1.98	5.3	2.01	0.38	2.08	0.882	-0.89	1.58	-4.36	1.88	2.79	0.855	2.96	6.12
cg00791548	2	30966534	CAPN13	92291	2	blue	-0.69	17.1	12	12.5	-6.03	5.47	-3.82	2.13	-3.67	-7.66	3.79	-4.87	3.4	2.97	-0.373	11.9	1.36	6	0.826	-1.97	-0.198	4.13	-2.73	5.49	3.55	6.92	2.39	2.39	3.65	5.32	3.3	1.66	1.08	-0.0492	-1.87	0.15	0.558	11.4	6.4	0.708	-0.576	-2.64	-2.11
cg00792185	16	9855960	GRIN2A;GRIN2A	2903	4	yellow	-2.96	13.2	5.86	17.6	-1.21	6.01	-0.813	1.4	-8	-9.06	4.94	-9.84	7.72	-2.28	-0.0778	11.6	-0.642	-0.57	-0.916	0.121	-1.45	5.43	-6.09	3.42	3.28	6.9	0.701	-1.35	3.63	5.28	3.81	2.65	-1.62	-1.8	-2.96	0.442	1.07	10.6	6.14	1.08	-2.28	-6.09	0.414
cg00793543	19	3650029	PIP5K1C	23396	4	yellow	-0.728	17.9	8.23	15.2	-7.43	1.32	-3.63	-0.61	-7.52	-15.7	1.33	-12.3	2.15	-3.97	-0.548	8.88	1.93	1.8	-0.74	-6.81	-0.758	1.15	-8.87	1.56	3.65	1.87	1.81	-3.4	-0.599	2.17	1.48	0.287	-0.975	-1.28	-2.23	0.0744	0.965	11.3	9.22	-0.598	-1.97	-7.59	-2.55
cg00793562	16	89114089		NA	5	green	1.67	-5.7	-8.31	1.84	21.2	3.74	13.2	4.35	2.08	10.8	1.56	1.78	14.5	-0.81	3.23	-0.337	0.234	-4.59	3.14	12.9	2.67	2.96	4.35	4.7	0.362	4.23	-0.00969	2.31	2.53	3.17	4.1	3.02	1.75	2.74	2.09	0.629	1.33	-4.5	1.43	3.62	2.14	3.08	5.88
cg00793719	14	95477946		NA	2	blue	-1.21	20.3	11.5	13.2	-11.1	1.57	-6.69	-1.32	-6.95	-15.9	2.2	-10.2	-0.182	-1.72	-1.21	9.15	1.18	3.8	-1.27	-8.29	-1.95	1.49	-7.93	1.6	3.54	2.07	1.7	-1.97	-0.463	2.41	1.55	-0.301	-0.547	-1.36	-2.87	-0.215	1.35	12.3	7.84	-1.16	-1.95	-6.83	-4.25
cg00793946	2	46163986	PRKCE	5581	5	green	2.62	-5.57	-9.92	1.74	19	1.45	14.5	4.03	2.35	7.9	-0.707	-0.23	12.1	-3.41	2.9	-2.03	-0.766	-4.69	4.14	9.49	3.66	2.11	2.65	2.09	-1.32	1.75	0.414	0.544	0.21	1.05	4.47	3.21	-0.793	0.862	0.26	-0.331	0.204	-4.39	0.0335	2.77	-0.493	1.49	4.96
cg00794174	12	131196417		NA	5	green	4.12	-10.3	-14.4	-3.07	17.1	-3.12	14.3	3.71	3.78	8.87	-3.67	1.11	6.26	-5.17	1.55	-7.1	-0.263	-5.94	5.03	6.31	4.04	-1.59	3.06	-0.694	-2.65	-3.56	1.14	-1.15	-1.95	-3.87	2.26	3.59	-1.56	-0.106	0.873	-0.884	-1.35	-7.5	-1.22	1.38	-0.924	2.02	4.52
cg00794673	6	35016449	ANKS1A	23294	4	yellow	-3.67	20.7	10.7	18.9	-7.42	5.8	-5.27	-0.216	-9.97	-15	5.02	-11.7	4.06	-1.93	-0.185	13.1	0.731	0.898	-2.59	-4.1	-2.49	3.73	-8.44	2.81	4.11	5.85	-0.0817	-1.36	2.38	5.14	1.34	0.439	-1.33	-1.91	-3.32	0.186	0.611	12.4	7.29	0.901	-2.69	-7.87	-2.65
cg00795927	7	640603	PRKAR1B;PRKAR1B;PRKAR1B;PRKAR1B;PRKAR1B;PRKAR1B	5575	5	green	3.78	-9.04	-12.5	-1.3	23.5	0.035	16.6	5.15	4.5	11.9	-1.83	2.42	10.3	-2.74	3.07	-4.32	0.0321	-4.76	5.47	10.5	4.6	0.933	5.22	2.77	-1.46	0.37	0.523	1.48	0.316	-0.54	4.25	4.12	0.383	2.15	2.48	0.386	-0.202	-7.01	-0.241	2.95	1.81	3.26	6.49
cg00797102	17	68168184	KCNJ2	3759	4	yellow	2.12	17.9	9.73	14.7	-4.98	3.19	-0.414	1.88	-2.84	-9.67	1.28	-7.62	3.59	-0.572	-0.659	11.7	3.02	5.97	2.41	-2.8	1.13	1.84	-4.49	5.17	4.25	3.93	4.74	0.534	3.51	4.16	3.65	0.762	0.956	0.509	-1.28	0.503	0.953	9.59	8.08	0.399	-0.726	-4.2	-2.29
cg00798431	5	128337585	SLC27A6;SLC27A6	28965	3	brown	0.304	18.9	18.7	8.47	-13.4	3.37	-7.09	-0.292	-1.5	-10.2	2.42	-2.7	-2.69	4.91	-0.984	12.4	2.17	10.1	0.0249	-4.88	-0.784	2.09	-2.58	4.62	3.55	4.88	2.79	2.54	4.19	4.8	1.63	-1.35	2.38	0.367	-0.46	1.03	1.52	11	5.21	-0.306	0.514	-3.59	-3.79
cg00799144	22	31217230	OSBP2	23762	5	green	1.01	-7.06	-11.3	1.5	22.1	2.1	13.3	3.58	0.661	9.04	1.01	-0.0277	13.3	-3.74	2.74	-2.27	-0.659	-7.01	2.59	10.7	1.82	2.41	2.22	1.92	-0.114	1.88	-0.86	-0.256	0.767	1.13	3.7	3.57	-0.483	0.722	1.12	0.13	0.528	-4.83	0.744	3.36	0.316	2.12	6.15
cg00802478	4	40588553	RBM47	54502	3	brown	-0.674	15.3	21.4	6.58	-13.9	3.68	-8.8	0.316	-1.11	-7.53	2.73	-0.622	-3.47	7.14	-0.453	12.7	4.41	10	-0.795	-3.87	-0.669	0.334	-0.62	5.14	5.19	4.99	1.45	4.08	5.8	4.41	-1.46	-1.53	2.16	0.827	-1.01	0.948	1.56	7.89	3.02	0.712	0.843	-1.82	-3.32
cg00804078	6	110736941	DDO;DDO	8528	2	blue	-1.06	23.3	15.1	13.9	-10.1	3.88	-5.66	1.54	-5.49	-12.9	3.04	-7.33	1.06	1.51	-0.744	13.6	2	5.61	0.123	-4.63	-0.499	2.41	-4.83	4.81	3.29	5.91	2.2	1.33	3.39	3.67	1.28	0.852	0.76	-0.325	-1.91	0.951	0.941	12.2	6.88	-0.485	-0.719	-5.58	-3.75
cg00805577	12	123333205	HIP1R	9026	2	blue	0.694	22.9	11.9	14.9	-10.2	1.49	-5	-0.511	-5.77	-15.9	1.29	-10.4	0.682	-1.91	0.177	10.5	4.55	4.75	-0.165	-7.73	-0.268	-0.507	-7.51	3.13	5.56	1.62	2.19	-1.86	0.735	3	0.198	-1.11	-0.4	-0.313	-2.46	0.329	0.882	10.4	7.89	-0.0208	-1.43	-6.67	-4.63
cg00806214	16	521912	RAB11FIP3	9727	4	yellow	-1.63	18.1	9.41	16.9	-6.24	3.68	-3.37	-0.424	-7.68	-13.3	3.78	-11.2	3.37	-2.68	0.291	11.6	2.54	1.98	-1.18	-4.3	-1.8	2.47	-7.98	3.01	5.98	3.51	0.821	-2.18	2.21	4.34	2.2	0.733	-0.454	-0.0877	-2.71	0.521	1.18	12	8.48	1.19	-1.11	-7.85	-2.69
cg00806959	1	44219988	ST3GAL3;ST3GAL3;ST3GAL3;ST3GAL3;ST3GAL3;ST3GAL3;ST3GAL3;ST3GAL3;ST3GAL3;ST3GAL3	6487	8	pink	6.07	2.43	1.78	3	4.23	1.43	6.72	17.1	5.14	3.68	-3.1	2.58	5.07	3.79	0.973	3.78	0.474	4.93	12.5	4.89	10.1	0.474	9.25	7.19	-4.63	5.2	4.42	5.67	4.47	-3.09	2.99	9.64	1.52	1.66	1.54	2.29	-5.21	-0.559	0.752	0.754	1.26	0.271	1.5
cg00808305	1	7434171	CAMTA1	23261	2	blue	-2.67	21.7	19.2	11	-13.7	4.42	-9.03	-0.434	-5.5	-12.6	4.42	-5.21	-1.26	3.61	-0.971	14	1.75	6.32	-2.02	-5.05	-2.46	2.81	-4.68	4.22	3.86	6.22	0.952	2.12	4.02	4.72	0.471	-0.651	2.02	0.365	-0.872	0.612	1.16	12.5	6.57	-0.027	0.354	-4.89	-3.11
cg00808511	16	52495237	TOX3;TOX3	27324	2	blue	1.89	17.7	9.03	15.9	-4.76	3.36	-1.05	1.81	-3.71	-9.76	1.55	-8.65	4.59	-1.07	0.0585	10.6	2.85	4.68	2.01	-3.36	1.2	1.8	-4.58	5.41	3.32	4.01	3.98	-0.108	2.18	4.2	3.43	0.484	0.698	0.0506	-1.35	0.609	0.544	9.3	9.01	0.944	-1.19	-5.06	-1.99
cg00808648	14	105779910	PACS2;PACS2	23241	2	blue	-1.35	25	13.5	16.3	-8.92	4.46	-4.64	0.173	-6.82	-14	3.73	-9.24	2.27	0.0444	-0.833	13.7	1.82	4.67	-0.694	-4.61	-1.44	3.38	-6.75	5.1	4	5.8	2.36	0.991	2.88	5.03	2.82	-0.264	0.728	-0.089	-2.14	0.523	1.06	13.1	8.12	-0.103	-1.06	-7.14	-3.28
cg00808969	11	77898785	USP35;KCTD21	NA	10	purple	1.49	-12	-6.27	-6.89	14.5	2.67	7.98	4.12	7.59	21.7	-0.168	11	5.9	5.68	3.07	-3.35	0.976	-0.816	2.33	14.1	3.58	0.422	11.2	2.77	-0.576	2.72	-1.44	5.94	4.7	1.47	-0.233	1.59	1.81	2.19	2.72	-0.574	0.349	-9.74	-4.97	3.17	2.94	9.92	5.91
cg00809477	1	10898189		NA	21	darkred	11.3	0.529	-0.526	-0.078	3.87	-4.42	8.81	13	8.98	3.73	-10.9	2.79	2.13	2	1.22	-0.308	1.79	6.13	14.1	2.34	17.2	-4.29	9.7	5.8	-8.62	0.686	5.73	5.09	1.39	-5.76	0.51	4.25	1.16	1.05	1.65	0.575	-4.75	-5.11	-0.468	-0.944	0.489	0.406	0.966
cg00812096	13	80584487		NA	4	yellow	-2.26	14.9	8.26	17.4	-2.25	7.25	-1.71	1.91	-6.3	-7.74	4.84	-8.29	7.38	-0.0791	0.436	12.3	0.581	1.71	-0.623	0.324	-0.493	4.77	-4.19	5.12	3.23	8.29	0.811	0.812	3.96	6.35	2.79	1.41	1.15	-0.175	-1.64	1.63	1.31	9.28	7.84	1.3	-0.545	-4.8	-0.749
cg00812735	16	52997936		NA	2	blue	0.0335	20.9	13.3	11.2	-11.3	1.78	-5.74	-0.0604	-4.2	-13.5	1.68	-6.87	-0.72	0.933	-0.421	10.6	2.18	6.57	0.112	-6.41	-0.513	1.4	-5.34	4.11	2.74	3.93	2.31	0.615	1.57	3.09	1.48	-1.16	0.755	-0.572	-2.08	0.268	0.926	10.6	6.45	-0.186	-0.473	-5.57	-3.9
cg00812761	4	53799391	SCFD2	152579	10	purple	1.43	-10.6	-3.31	-10.1	7.37	1.77	4.47	2.9	9.04	17.1	0.167	14.7	0.344	8.1	1.83	-3.94	0.284	1.88	2.21	9.48	2.18	0.6	11.7	1.91	-1.1	1.85	-0.803	6.71	3.26	0.74	-0.0302	1.39	3.88	3.52	5.19	2.68	-1.25	-7.81	-5.8	2.77	4.52	7.6	3.51
cg00812799	13	21295612	IL17D	53342	10	purple	4.91	-10.2	-4.91	-7.2	12.4	0.378	10.2	5.1	11.4	19.7	-1.36	12.5	3.4	6.27	3.05	-2.72	2.91	2.06	5.54	12.3	4.88	-0.637	13	5.51	-0.155	1.58	0.743	7.02	5.42	0.6	1.55	1.81	4.54	4.91	5.22	1.44	-0.0805	-8.71	-3.18	2.65	5.51	6.75	4.91
cg00812861	9	35114699	KIAA1539	NA	10	purple	0.433	-7.1	-0.174	-5.07	8.23	5.06	4.63	3.89	6.99	17.2	1.67	12.7	4.62	10.2	2.67	1.23	1.84	2.21	1.29	14.8	2.79	1.6	11.9	4.91	1.2	5.53	-0.891	8.88	9.43	3.79	-0.257	0.861	2.6	2.31	2.83	-0.823	-0.673	-6.15	-4.81	3.93	3.39	7.34	5.54
cg00813027	7	142027996		NA	3	brown	-0.652	17.9	16.4	9.33	-11.2	3.16	-7.07	0.913	-3.02	-9.31	2.11	-3.46	-0.944	4.44	-1.26	12.4	1.19	7.72	-0.179	-4.19	-0.0386	2.39	-2.13	4.87	1.89	5.98	2.54	2.65	4.37	3.48	1.07	-0.437	1.49	-0.143	-1.05	1.32	-0.187	10.4	5.15	-0.758	-0.045	-3.65	-3.41
cg00813162	14	69443362	ACTN1;ACTN1;ACTN1	87	5	green	2.89	-18.7	-14.4	-9.47	16.4	-1.92	10.3	2.26	6.65	17.4	-2.69	7.38	3.55	-0.51	2.68	-9.86	0.0531	-4.6	2.79	8.53	3.16	-1.73	7.43	-1.23	-1.83	-3.08	-1.38	0.975	-0.84	-2.38	-0.0604	1.67	-0.173	1.45	1.78	0.414	-0.52	-11.9	-5.52	2.25	1.36	6.47	4.6
cg00813509	12	124941317	NCOR2;NCOR2	9612	5	green	2.09	-10.2	-15.6	-1.33	20.4	-0.64	13.4	2.75	1.6	8.85	-1.07	-0.317	9.4	-6.05	3.7	-6.65	-0.754	-7.92	3	7.39	2.28	0.6	1.71	-1.26	-0.712	-2.07	-1.72	-1.88	-2.43	-1.38	3.03	3.86	-1.91	0.859	0.414	-1.38	0.87	-6.72	-0.783	2.97	-0.552	2.86	5.63
cg00814752	18	56941706	RAX	30062	3	brown	-1.46	10.5	17.1	6.24	-7.93	4.23	-5.22	1.29	-0.581	-3.78	3.91	1.26	-1.36	8.33	-0.872	14.9	3.39	8.21	-0.623	1.23	-0.835	1.82	0.921	6.39	4.11	7.11	1.45	4.74	12.2	4.19	-0.782	-0.133	3.37	0.971	1.11	1.12	-0.798	7.54	2.93	1.16	2.15	-1.06	-1.56
cg00814985	13	114801132	RASA3	22821	3	brown	0.00847	21.1	19.4	10.9	-12.4	3.13	-7.36	0.593	-3.1	-10.6	2.51	-4.21	-0.961	4.09	-0.17	13.1	4.79	8.08	-0.324	-5.42	-0.203	0.333	-2.93	5.86	4.55	4.62	1.95	2.13	4.14	4.01	-0.464	-1.54	1.95	1.02	-0.959	1.14	0.725	9.01	5.64	0.631	0.376	-4.22	-4.66
cg00815644	7	28205577	JAZF1	221895	2	blue	2.97	18.6	11	12.1	-7.84	1.32	-2.48	2.84	-2.19	-10.9	-0.582	-6.79	1.17	0.325	-0.578	10	3.43	6.96	2.97	-5.05	2.93	-0.685	-3.17	4.77	1.33	3.28	4.04	0.803	1.75	1.76	0.479	-0.0651	-0.0602	-0.871	-1.74	1.03	-0.0809	7.63	5.77	-1.15	-1.39	-4.83	-4.05
cg00816080	16	49518084		NA	3	brown	-1.05	15.4	17.5	8.05	-10.4	4.07	-6.64	1.04	-2.37	-7.69	3.05	-2	-1.4	5.83	-0.106	13.4	2.79	8.04	-0.546	-2.19	-0.366	1.88	-1.21	5.59	3.6	6.51	1.12	4.1	6.56	4.25	-0.182	-0.407	2.83	0.368	-0.241	1.24	-0.056	9.14	4.32	-0.0687	1.25	-3.57	-3.83
cg00817377	7	73441057	ELN;ELN;ELN;ELN;ELN	2006	3	brown	-0.912	16.8	19.9	8.79	-11.5	5.29	-6.95	0.998	-1.98	-8.08	3.51	-1.73	-1.32	6.18	-0.165	14.5	2.9	8.93	-0.395	-2.34	-0.675	2.24	-1.23	5.12	4.7	6.66	1.24	3.75	6.67	5.29	0.238	-0.214	3.29	2.08	0.935	0.548	1.08	9.66	4.95	1.05	1.95	-2.98	-2.12
cg00818106	10	134221503	PWWP2B;PWWP2B	170394	10	purple	4.03	-13.7	-7.37	-8.77	14	0.191	9.43	4.37	10.3	22	-2.41	11.5	3.71	4.7	2.35	-5.2	2.13	0.189	4.16	11.4	5.12	-1.65	12.2	2.95	-1.51	0.335	0.373	5.53	3.1	-0.2	-0.278	0.87	1.46	2.39	2.41	-0.915	0.175	-12.3	-5.98	2.49	2.14	8.44	4.38
cg00819338	3	133646065		NA	10	purple	2.51	-12.8	-6.93	-7.79	13.7	1.41	8.89	3.46	8.37	20.5	-0.974	10.9	4.48	4.92	2.2	-4.32	1.17	-0.683	2.92	12.4	3.54	0.0506	10.4	2.76	-0.473	1.25	0.354	6	3.94	0.936	0.781	1.33	2.21	2.41	3.11	0.441	0.355	-9.67	-4.59	3.27	3.34	8.75	5.72
cg00821413	14	102508902	DYNC1H1	1778	5	green	1.26	-4.9	-9.92	3.5	23	3.13	13.7	4.37	0.551	8.36	1.67	-0.936	16.5	-3.47	3.46	-0.803	-0.067	-6.2	3.18	11.2	2.29	3.11	2.2	3.69	0.755	3.41	-0.549	0.544	0.88	2.3	4.67	3.87	-0.515	0.992	0.76	-0.32	1.25	-3.8	1.16	4.12	0.54	1.74	6.04
cg00821483	17	55320776		NA	2	blue	-3.11	18.1	19.6	9.46	-13.3	5.14	-9.58	-0.952	-4.85	-10.3	4.76	-3.5	-1.52	5.11	-0.419	14.5	1.97	6.5	-3.07	-3.64	-2.54	2.89	-3.12	4.81	4.06	7.17	-0.0593	3.16	5.72	5.53	-0.463	-1.99	2	-0.307	-0.655	0.938	0.622	11	4.57	1.11	0.389	-4.27	-2.6
cg00821731	2	219744626	WNT10A	80326	3	brown	0.74	9.77	17.2	3.83	-7.47	4.36	-4.66	2.33	2.26	-1.36	1.71	3.77	-1.7	10.9	-0.681	11.7	3.64	11.7	0.995	1.33	1.73	1.62	4.07	7.62	3.42	7.17	2.92	7.98	10.4	4.68	0.432	-0.529	3.77	1.77	1.49	0.807	-1.44	5.41	1.97	0.443	3.09	1.05	-0.159
cg00822157	14	97673471		NA	7	black	5.46	-6.54	-9.74	-0.0513	21	0.301	18	6.85	5.62	11	-2.2	2.52	10.9	-1.44	2.97	-2.55	0.701	-2.36	7.37	10.5	6.07	0.814	5.95	4.03	-1.64	1.36	2.08	2.72	1.67	-0.0816	4.64	4.37	0.639	2.46	2.01	-0.469	-0.649	-5.94	-0.0953	2.54	1.56	3.7	5.47
cg00823843	1	244094885		NA	2	blue	1.17	17.8	14.9	8.75	-13.1	0.552	-6.66	-0.686	-2.31	-11.8	0.812	-5.1	-3.06	1.61	-0.806	9.63	3.85	8.16	0.464	-7.65	-0.593	-0.201	-4.37	2.98	4.95	1.01	3.13	-0.109	1.79	2.21	1.03	-0.557	0.671	0.6	-2	-0.0836	0.555	10.6	5.99	-0.745	-0.188	-4.26	-4.26
cg00825734	1	1217511	SCNN1D;SCNN1D;SCNN1D	6339	2	blue	1.13	17.4	9.73	14.4	-4.02	4.88	-1.11	2.16	-2.98	-7.71	3.46	-6.39	5.32	1.1	2.07	11.3	3.29	5.44	1.9	-1.7	0.52	3.35	-3.16	7.56	5.14	6.63	2.13	2.18	2.24	6.17	4.19	0.902	2.68	2.5	-0.481	2.53	2.46	9.7	8.49	1.72	1.59	-2.72	-1.28
cg00827176	8	21885702	NPM2	10361	5	green	0.67	-0.393	-4.94	7.68	15.9	5.65	10.8	7.17	-0.917	5.27	2.5	-2.51	20.3	-1.79	4.14	3.26	0.455	-4.14	3.71	10.7	3.51	3.61	2.42	4.96	0.974	6.32	-0.633	1.18	3.23	3.2	3.65	5.53	0.686	1.33	0.704	0.247	-0.192	-1.25	3.97	4.62	0.401	0.574	5.37
cg00828583	3	117836331		NA	3	brown	-3.65	12.4	21.6	5.93	-10.5	7.77	-9.01	0.427	-1.55	-4.37	5.64	2	-1.73	10.5	-0.195	14.7	1.29	9.16	-2.34	0.145	-1.96	4.37	0.835	4.73	4.18	9.38	-0.0465	5.42	9.35	6.97	-0.0235	-0.0193	4.57	1.48	1.09	1.17	0.35	9.39	3.16	1.72	2.15	-0.0676	-1.85
cg00830252	12	16039824	STRAP	11171	4	yellow	-5.36	19.9	11.7	16.6	-7.8	7.13	-7.08	-0.749	-10.5	-13.5	6.27	-9.59	3.66	-0.149	-0.671	13.3	-1.15	1.05	-3.93	-3.32	-3.55	5.81	-7.8	2.22	3.19	7.79	-0.554	-1.36	2.97	5.93	1.82	0.76	-0.0968	-1.6	-2.45	1.07	0.0574	14.6	7.29	0.652	-2.15	-6.9	-2.56
cg00830492	7	47432311	TNS3	64759	2	blue	-2.2	20.3	11.4	16.4	-6.67	5.44	-4.53	0.142	-6.94	-11.7	5.1	-8.56	3.93	0.189	0.729	13	1.84	3.25	-1.26	-3.29	-2.14	3.97	-6.34	5.2	4.96	6.64	0.539	-0.54	3.06	6.04	2.64	0.232	1.36	0.309	-0.879	1.15	1.77	12.4	8.5	1.4	0.733	-5.18	-2.56
cg00830621	16	18799106	RPS15A;RPS15A	6210	2	blue	-3.77	19.9	11.6	15.5	-6.86	6.53	-6.11	0.264	-8.28	-10.9	5.57	-8.07	4.29	1.12	-0.608	12.3	0.0775	2.44	-2.38	-2.98	-2.25	5.11	-5.79	4.15	3.76	8.05	0.569	0.645	2.12	5.98	2.16	0.844	0.573	-0.98	-2.15	0.571	1.1	13.1	7.3	-0.0745	-1.03	-4.45	-2.59
cg00830813	7	984874	ADAP1	11033	2	blue	-0.796	21.7	13.2	14.3	-8.94	2.97	-4.6	1.37	-5.95	-13.6	3.07	-8.22	1.36	0.374	-0.396	13.1	2.13	4.59	0.307	-4.53	-0.69	2.11	-5.47	5.47	3.16	5.31	1.91	0.832	3.52	3.02	1.62	0.61	1.07	0.132	-0.858	0.847	0.344	11.9	7.71	-0.251	-0.299	-7.45	-4.43
cg00831929	1	11919018	NPPB	4879	3	brown	0.0294	13.4	25.7	5.03	-12.2	4.12	-7.25	0.647	1.18	-4.48	3.14	2.68	-3.7	10.9	-0.703	14.6	4.38	12.4	-0.194	-1.16	-0.519	1.26	1.63	7.2	4.76	6.62	2.4	5.71	9.47	5.14	-0.201	-1.7	3.89	1.25	0.599	1.67	1.15	7.52	2.71	1.31	2.36	-0.311	-2.71
cg00832567	19	1281113		NA	5	green	3.24	-7.4	-13.2	0.369	20.2	-0.683	14.3	5.1	2.05	8.18	-1.1	-0.754	10.8	-5.49	2.73	-4.61	0.000482	-6.52	5.09	7.37	3.45	0.0154	2.71	1.4	-1.42	-0.825	0.347	-1	-1.82	-1.91	3.22	4.49	-1.48	1.08	0.418	-0.905	0.462	-6.07	0.128	2.08	-0.352	1.54	4.89
cg00832581	7	55076394		NA	2	blue	0.147	17.1	12.2	11.1	-6.99	3.64	-3.24	2.86	-3.12	-9.03	2.29	-4.75	1.68	2.8	-0.487	11.8	0.155	6.43	1.95	-2.29	0.836	3.4	-2.32	5.57	0.74	6.91	2.58	3.06	4.16	3.37	3.07	1.49	1.28	-0.886	-0.625	0.793	-0.786	10.6	6.23	-0.437	-0.657	-3.91	-1.5
cg00832924	7	117449060	CTTNBP2	83992	2	blue	-0.439	23.3	12.2	17.1	-7.86	4.09	-3.53	0.679	-6.2	-13.8	3.28	-9.79	2.94	-0.798	-0.359	13.2	1.91	4.52	0.366	-4.55	-0.959	2.76	-6.7	4.34	4.13	4.83	2.65	-0.379	2.91	4.64	2.93	0.428	0.749	-0.295	-1.59	0.84	0.155	12.5	8.97	-0.118	-1.24	-7.51	-3.91
cg00832928	3	150329458	SELT	51714	22	darkgreen	-6.97	0.752	0.286	2.81	1.88	7.56	-1.52	-2.84	-4.43	0.226	8.26	-0.736	3.95	0.631	-1.12	2.81	-9.92	-2.86	-3.81	3.84	-7.14	18.5	-2.73	-1.01	2.44	6.38	-1.53	0.0582	1.94	7.33	14.1	5.26	2.4	2.31	2.32	0.73	1.56	10.4	3.14	0.788	3.1	0.393	5.24
cg00833479	7	62528852		NA	46	brown4	0.17	2.41	1.12	2.54	-0.803	1.58	-0.223	0.974	-1.03	-1.92	0.572	-1.93	0.858	-0.903	-0.541	1.73	-0.124	0.518	0.745	-0.887	0.229	1.77	-0.58	1.06	0.355	1.06	1.68	-0.135	-0.0268	1.19	2.4	1.39	0.71	2.12	-0.255	0.625	-3.46	2.99	1.62	2.47	-1.58	-1.71	2.95
cg00833562	16	2501147	CCNF	899	2	blue	-2.74	24.7	14.6	16.1	-9.22	5.83	-6.34	-0.634	-7.21	-13.4	5.47	-8.12	2.45	1.3	-0.736	14.6	1.9	4.34	-2.14	-4	-2.68	3.99	-6.59	5.35	5.14	7.06	1.71	0.723	3.37	6.56	2.14	-0.682	1.79	0.508	-1.18	0.77	0.85	13.8	8.37	0.225	-0.0358	-5.48	-3.1
cg00833703	16	57809842	KIFC3;KIFC3;KIFC3	3801	3	brown	-0.598	17.4	17.9	9.19	-10.4	4.63	-6.67	1.2	-1.89	-7.84	3.35	-1.9	-0.596	6.17	0.221	13.5	2.84	8.98	-0.0523	-2.6	-0.307	2.38	-1.37	6.09	4.25	6.85	1.51	3.98	5.3	5.17	0.889	-0.23	1.91	0.528	-1.2	-0.0856	1.07	9.77	4.19	0.936	0.741	-1.43	-3.05
cg00833777	16	31271642	ITGAM;ITGAM	3684	2	blue	1.69	24.5	13.9	13.1	-10.2	2.35	-4.35	1.03	-3.29	-13	1.28	-7.3	0.437	0.755	-0.497	11.8	3.64	7.99	1.61	-6.02	0.662	0.859	-4.84	5.58	3.82	3.59	3.93	1.4	1.83	3.71	2.09	-0.6	1.27	0.897	-1.64	0.462	0.548	10.7	7.44	-0.627	-0.615	-5.01	-4.22
cg00834223	2	236944951	AGAP1;AGAP1	116987	2	blue	1.64	22.6	13.4	12.6	-10.1	1.87	-4.11	0.35	-3.2	-13	0.554	-7.09	0.139	0.672	-0.638	11.2	3.63	7.63	1.02	-6.05	0.785	0.628	-5.11	4.84	3.5	3.27	3.84	0.87	1.97	3.61	1.69	-1.17	0.908	0.538	-1.29	0.64	0.901	10.5	7.29	-0.986	-0.0959	-5.32	-3.95
cg00834536	16	4013537	ADCY9	115	3	brown	-1.33	15.5	19.4	9.29	-7.22	6.5	-4.88	3.06	-1.36	-4.71	4.7	0.0111	1.18	9.12	0.184	17.5	2.8	8.99	0.465	1.41	0.333	4.05	1.41	9.43	3.88	11	1.77	8.26	10.8	6.17	1.35	0.75	3.73	1.5	0.247	1.33	-0.427	9.38	4.13	1.85	1.95	-2.07	-0.651
cg00834988	7	70060153	AUTS2;AUTS2	26053	1	turquoise	16.5	0.0495	-1.21	-1.46	2.1	-7.56	9.41	8.29	11.2	2.62	-16.4	2.44	-0.221	0.557	1.1	-2.24	6.02	7.32	12.9	-0.52	18.7	-9.61	7.69	5.5	-6.97	-3.76	7.2	4.03	-0.509	-5.98	-1.93	-0.896	-0.154	1.33	0.236	-0.894	-3.21	-7.83	-1.04	-1.69	-0.15	0.654	-2.04
cg00835521	16	5038330	SEC14L5	9717	5	green	1.64	-6.27	-11	1.16	17.8	0.761	11.8	5.08	0.565	7.17	-0.934	-0.811	11.4	-4.31	2.85	-3.35	-1.24	-6.79	3.55	7.86	3.83	1.24	2.64	1.11	-2.36	1.15	-1.15	-0.547	-1.05	-0.945	2.52	4.46	-1.06	1.07	0.36	-0.273	0.0943	-5.24	0.34	2.32	-0.267	1.5	5.11
cg00836662	7	100844445	MOGAT3	346606	3	brown	-0.868	10.3	20.4	4.89	-8.14	5.24	-5.45	1.13	1.07	-1.92	3.86	3.84	-1.69	12.5	-0.611	15.8	4.41	10.5	-0.764	2.45	-0.401	1.74	2.71	8.89	4.45	9.24	1.85	8.42	13.2	6	-1.1	-2.11	4.93	1.66	1.27	0.599	1.07	5.71	2.15	1.13	2.9	0.483	-1.75
cg00837103	20	61447268	COL9A3	1299	10	purple	4.47	-9.18	-3.15	-7.36	10.4	1.07	8.74	4.67	11.3	19.4	-0.929	14	2.82	8.12	2.66	-1.93	3.13	3.16	4.94	12.1	4.41	-0.603	12.8	5.73	0.399	2.23	1.39	9	5.91	1.39	1.32	1.09	4.65	4.87	4.35	0.805	-0.42	-8.73	-4.23	3.19	6.14	10.4	4.98
cg00838756	15	35049448		NA	2	blue	2.5	17.6	12.4	9.98	-8.7	1.17	-3.48	2.05	-1.79	-9.84	-0.215	-4.86	-0.268	2.02	-1.25	10.4	3.16	7.65	2.38	-4.64	2.1	0.201	-2.49	5.55	1.97	3.85	4.56	1.72	3.17	2.26	1.02	-0.179	1.51	0.218	-0.323	1.59	-0.919	8.81	5.96	-1.4	0.493	-4.37	-3.19
cg00839132	18	74692235	MBP;MBP;MBP;MBP;MBP	4155	2	blue	-1.93	24	14.1	14.7	-10.3	4.1	-6.4	0.236	-6.9	-14.8	3.33	-8.39	1.14	0.428	-0.479	13	0.936	4.49	-1.15	-5.42	-1.39	3.25	-6.37	3.43	3.2	5.48	1.23	-0.435	2.56	4.15	1.71	0.446	0.976	-0.0754	-1.14	0.881	-0.0735	13.4	7.64	0.0486	-0.805	-6.51	-3.32
cg00840270	16	1231464	CACNA1H;CACNA1H	8912	2	blue	-0.921	16.7	9.7	17.2	-3.66	5.23	-2.04	1.35	-5.81	-8.8	3.64	-8	6.1	0.113	1.25	13.2	2.36	2.81	-0.352	-1.28	-0.234	3.36	-4.76	5.26	4.49	6.42	0.899	-0.421	4.51	5.52	2.34	0.684	0.474	0.0887	-2.23	0.187	0.719	9.76	7.31	2.29	-1.45	-5.41	-1.77
cg00840403	16	71560205	CHST4;CHST4;CHST4;CHST4	10164	2	blue	-0.789	13.5	17.5	7.59	-9.44	4.27	-4.58	1	-0.739	-6.83	3.07	-1	-1.83	6.26	-0.658	14.3	2.8	9.18	0.0301	-0.432	-0.398	2.48	-0.826	5.87	4.29	6.65	1.89	5.39	8.46	4.7	1.04	-0.111	2.68	1.29	-0.506	1.11	0.557	8.91	3.87	0.297	1.52	-2.58	-1.85
cg00842259	7	42004866	GLI3	2737	2	blue	-0.0963	17.4	11.6	13.4	-6.08	3.19	-2.91	1.17	-4.45	-9.67	3.35	-6.53	2.72	1.29	0.637	12.8	3.9	4.46	0.364	-2.64	-0.534	1.41	-4	7	4.2	5.67	1.85	2.04	4.62	4.08	1.17	-0.538	1.48	0.762	-0.997	0.427	1.13	9.34	7.33	0.925	0.648	-8.56	-2.62
cg00842918	17	9940321	GAS7;GAS7	8522	3	brown	1.46	22	14.2	11.8	-10.8	2.62	-5.06	0.735	-3.01	-12.4	1.03	-6.36	-0.385	1.26	-0.193	11.1	4.09	7.86	0.995	-6.24	0.725	0.218	-4.4	4.48	4.17	3.2	3.24	1.16	1.93	3.66	0.917	-0.925	1.03	0.668	-1.91	1.81	0.218	9.88	6.34	-0.0186	-0.694	-5.43	-4.92
cg00845626	3	52726310	GNL3;GNL3;GNL3;SNORD69	NA	8	pink	6.33	3.12	0.807	4.54	5.53	0.752	8.55	17.7	5.07	2.88	-2.97	1.1	6.48	2.39	1.13	3.85	0.274	4.49	13.9	4.98	10.1	1.11	8.08	8.35	-4.86	5.24	4.91	5.66	3.61	-3.17	4.79	10.6	1.06	1.08	1.4	2.39	-5.22	0.058	1.82	0.78	1.32	-1.01	1.46
cg00847453	6	110720501	DDO;DDO	8528	5	green	1.27	-13.7	-7.72	-8.38	13.7	1.92	8.42	3.37	7.53	19	0.417	11	3.82	4.26	3.67	-4.27	0.187	-1.89	2.36	13	2.34	0.748	9.91	2.1	-0.633	1.8	-2.4	5.03	3.84	0.903	0.6	2.11	2.89	3.73	4.98	0.934	0.704	-9.62	-5.03	3.66	5.99	8.38	6.49
cg00848461	5	176732093	PRELID1;RAB24;RAB24	NA	5	green	-1.17	-6.21	-8.06	1.02	18.2	4.48	10.5	4.27	0.757	9.39	2.99	1.95	12.4	-0.125	2.4	-0.715	-4.15	-5.35	1.93	13	1.21	6.44	4.03	2.39	-1.94	5.99	-1.47	2.6	2.56	2.46	5.45	5.2	1.25	1.26	2.37	0.18	0.51	-2.25	0.119	2.68	2.07	3.35	7.44
cg00848780	19	46174455	GIPR	2696	4	yellow	-0.981	13.2	7.1	17.1	-0.874	6.06	0.392	2.7	-5.43	-6.74	4.13	-7.8	8.59	-0.409	0.647	13.1	1.09	1.52	0.829	1.46	0.0558	4.48	-3.76	5.87	3.8	7.56	1.91	1.18	5.82	5.55	3.68	2.01	1.15	-0.571	-0.0537	0.13	0.759	8.57	9	1.37	-0.559	-4.6	1.28
cg00849365	16	5074999	NAGPA	51172	4	yellow	-1.13	15.7	7.84	17.2	-2.68	5.16	-1.07	1.75	-6.25	-9.35	4.25	-8.88	6.67	-1.14	0.994	11.9	1.77	2.08	0.346	-1.2	-0.636	3.8	-5.56	4.94	4.65	6.21	1.37	-0.455	3.04	5.37	3.12	1.82	0.0494	0.35	-2.45	0.875	1.3	10.1	6.74	1.73	-1.14	-5.17	-1.69
cg00849713	6	166267744		NA	3	brown	1.08	14.7	23.6	4.83	-14.6	2.47	-7.86	0.297	1.31	-6.14	1.48	1.41	-5	9.05	-0.696	12.1	5.28	12.9	0.24	-3.58	0.249	-0.453	0.817	6.31	4.13	4.49	2.67	5.39	6.63	3.9	-1.33	-2.7	3.69	1.97	0.0928	0.91	0.408	6.99	2.88	0.181	1.98	-0.836	-4.23
cg00849853	21	47808878	PCNT	5116	5	green	2.1	-5.85	-8.51	1.15	19.2	2.52	13.7	6.07	2.69	9.28	0.00267	1.39	11.6	-1.62	3.32	-0.789	-0.982	-4.05	4.7	11.7	4.19	2.5	5.02	3.67	-2.09	3.64	-0.295	2.08	2.12	0.805	4.01	4.71	-0.0181	1.23	1.39	0.985	0.432	-4.61	-0.188	3.13	1.51	1.76	5.75
cg00850073	5	139016870		NA	4	yellow	-0.743	13.5	7.32	17.1	-1.03	5.39	0.335	1.89	-5.42	-6.84	4.09	-8.47	8.49	-1.01	1.41	12.9	3.93	1.31	-0.0352	0.922	0.0314	2.26	-4.29	5.69	6.17	6.39	1.04	1.03	4.75	5.73	1.31	0.61	-0.217	0.053	-1.7	0.0656	2.28	7.06	7.39	1.99	-1.24	-5.06	-0.406
cg00850538	2	36582038	CRIM1	51232	5	green	1.42	-5.68	-8.9	1.34	18.3	3.02	11.7	3.67	1.95	9.92	0.89	1.29	13	-1.7	3.31	-1.79	-0.436	-4.76	2.76	10.2	2.55	2.66	3.6	2.42	-0.379	2.54	-0.49	0.798	0.508	2.28	3.92	3.07	0.665	1.12	1.57	0.252	0.0662	-4.17	1.3	3.95	0.317	3.38	6.17
cg00850612	1	6131676	KCNAB2;KCNAB2	8514	5	green	1.9	-6.94	-12.5	1.01	18.6	-0.22	13.1	2.45	1.08	6.69	-0.029	-1.47	10.2	-6.02	2.75	-3.89	-0.724	-6.91	3.13	7.41	1.56	1.92	0.742	0.56	0.192	-0.726	-0.533	-1.55	-1.38	-0.314	4.95	3.94	-0.674	2.24	1.03	0.0418	0.32	-3.49	1.42	2.14	0.658	0.985	5.21
cg00851627	1	2156394		NA	8	pink	6.01	1.75	0.579	2.98	4.54	-0.267	6.69	18.5	4.36	3.09	-4.53	1.65	5.14	2.56	1.41	2.68	0.382	3.38	12.9	4.21	11.5	-0.777	9.04	6.27	-5.71	4.43	3.35	5.02	3.24	-5.06	1.22	10.5	0.827	1.29	1.63	0.754	-3.59	-1.68	0.961	0.271	1.24	-0.155	2.67
cg00852033	16	2058572	ZNF598	90850	5	green	-1.49	-4.31	-6.36	3.21	17.1	6.33	9.14	3.69	-0.667	8.77	3.72	0.623	15.4	-0.57	3.84	1.15	-1.25	-5.76	0.605	12.9	1.02	4.75	3.16	2.91	1.17	5.86	-2.16	2.25	3.16	4.32	3.55	3.82	0.0885	0.897	1.21	-0.131	0.675	-2.76	0.644	4.92	1.14	3.48	7.08
cg00853237	1	1638309	CDK11A;CDK11B;CDK11B;CDK11B;CDK11B;CDK11A;CDK11B;CDK11B	NA	8	pink	2.2	1.98	2.48	2.65	3.95	2.42	3.73	17.3	2.66	3.82	-1.67	3.28	5.02	5.2	1.25	4.44	-0.806	3.09	9.05	5.98	8.91	1.53	9.69	6.54	-5.27	7.86	1.42	5.38	5.33	-3.45	0.571	11	1.38	1.02	2	2.58	-4.68	-0.384	-0.238	1.45	1.57	1.2	1.63
cg00853733	12	122244223	SETD1B	23067	10	purple	5.04	-15	-10.2	-9.63	13.7	-2.43	10.3	2.93	9.8	18.9	-3.82	9.34	2.7	1.89	2.96	-8.2	3.22	-1.09	4.14	8.37	4.8	-4.29	9.42	1.18	-1.01	-3.08	0.256	3.26	0.226	-2.07	-1.48	-0.28	0.0534	1.07	1.56	0.23	0.283	-14.5	-5.83	2.65	1.55	7.84	3.36
cg00853742	20	39990972	EMILIN3	90187	2	blue	1.63	21.6	11.9	13.6	-8.04	2	-3.13	4.93	-3.71	-12.1	-0.32	-7.51	1.76	0.552	-1	11.1	1.21	6.05	3.59	-4.83	3.29	1.3	-2.92	5.77	-0.69	5.28	3.91	1.74	2.01	0.854	1.82	2.52	0.218	-1.04	-1.27	1.17	-2.46	9.97	6.94	-1.28	-1.54	-5.86	-3.8
cg00854172	2	23748104	KLHL29	114818	8	pink	7.25	0.903	0.823	1.18	4.79	-0.823	7.59	17.3	6.86	4.64	-5.08	3.69	3.87	4.2	2.36	2.32	1.92	4.96	13.1	4.96	12.3	-1.82	10.8	8.25	-5.86	4.28	3.29	6.78	3.66	-4.71	0.948	7.82	1.28	2.48	0.52	1.17	-4.46	-3.27	-0.772	1.2	1.67	0.472	1.27
cg00855262	19	21649132		NA	22	darkgreen	-6.54	1.63	1.31	3.86	2.17	7.43	-1.12	1.06	-4.46	0.33	7.73	-0.622	5.04	1.54	-1.21	4.34	-10.6	-2.21	-1.55	4.85	-4.84	17.2	-0.841	-0.0997	0.404	8.17	-0.959	0.633	3.46	4.7	12.7	8.88	2.41	1.41	1.45	1.61	-0.422	10.2	3.12	0.473	2.76	-0.75	6.03
cg00855299	16	89603817	SPG7;SPG7	6687	2	blue	0.0958	21.5	10.3	14.9	-9.84	0.841	-4.98	-1.15	-6.98	-17.7	1.43	-12	0.649	-3.29	-1.01	9.37	3.35	3.46	-0.691	-8.49	-1.04	0.22	-8.94	2.52	4.54	1.26	2.58	-2.64	-0.406	2.41	1.12	-1.02	-0.864	-0.304	-3.15	-1.14	0.833	11.2	8.22	-1.21	-2.13	-7.69	-4.4
cg00856997	4	2366103	ZFYVE28	57732	5	green	3.23	-7.01	-10.6	0.291	20.8	1.24	14.2	4.73	3.25	10.6	-0.286	1.56	11.6	-2.19	3.47	-2.88	0.873	-4.75	4.57	10.3	3.61	1.13	4.54	4.21	-0.321	1.64	0.0913	2.12	0.656	0.875	3.79	2.98	3.02	3.65	4.12	0.341	1.71	-6.12	3.09	3.3	3.1	3.31	6.47
cg00859330	1	4835298	AJAP1;AJAP1	55966	7	black	7.84	-7.36	-9.67	-2.04	16.3	-1.99	17.5	6.74	7.74	10.2	-5.07	3.02	7.22	-1.8	2.19	-4.19	1.44	-0.885	8.54	8.03	8.15	-1.55	6.58	3.14	-2.78	-0.978	3.08	2.24	0.313	-1.93	3.29	3.38	-0.00307	1.75	2.04	-0.895	-1.37	-7.89	-1.38	1.16	1.11	3.79	4.1
cg00859622	20	36532668	VSTM2L	128434	5	green	4.43	-7.69	-15.2	-0.175	18.8	-2.29	15	5.5	2.36	7.01	-3.91	-1.63	9.59	-7.18	2.21	-6.71	-0.427	-6.59	5.97	5.34	5.47	-1.1	2.45	-0.0842	-3.27	-2.57	0.864	-2.39	-4.1	-3.62	2.79	4.63	-1.99	0.587	0.278	-0.514	-0.204	-6.91	0.162	1.14	-0.805	0.896	3.9
cg00860090	1	226832000	ITPKB	3707	5	green	1.69	-9.39	-7.99	-2.74	19.5	3.28	12.5	3.48	5.24	16.1	1.51	6.05	9.11	1.81	3.34	-1.87	-0.0481	-2.68	3	14.8	2.03	2.96	7.06	3.26	0.978	3.12	-0.569	4.94	4.57	3.07	4.01	2.86	1.54	2.42	2.36	0.248	1.47	-6.1	-2.23	4.48	2.77	4.97	7.39
cg00862394	1	120167079	ZNF697	90874	5	green	2.01	-7.27	-11.2	0.768	20.2	1.23	14.1	2.64	1.91	8.59	0.201	0.124	11.3	-3.88	3.16	-2.87	0.124	-5.93	2.77	9.71	2.17	1.27	2.09	1.6	0.115	0.677	-0.431	-0.606	0.542	1.11	3.27	2.22	0.497	2.04	1.83	0.0499	0.571	-5.28	0.844	3.81	1.28	1.78	5.33
cg00863378	16	56549757	BBS2	583	2	blue	-3.85	19.2	12.2	16.9	-6.87	6.81	-5.32	-0.219	-8.34	-11.6	5.79	-8.59	4.15	0.403	-0.509	14.5	-0.584	2.29	-2.49	-2.4	-2.94	5.83	-6.7	2.9	4.44	7.52	0.578	-0.879	4.28	6.29	3.13	1.27	1.09	-0.618	-0.843	0.961	0.636	14.2	8.5	1.02	-0.539	-6.26	-1.4
cg00863397	16	67215239	KIAA0895L	653319	5	green	2.21	-4.92	-8.22	2.59	20.7	2.89	13.7	5.97	1.74	9.4	0.448	0.955	14.7	-1.41	3.64	-0.143	0.612	-4.59	4.19	12.2	4.25	2.15	4.31	5.09	-0.922	4.24	-0.208	2.45	2.46	1.67	3.29	3.61	0.955	1.97	2.29	0.206	0.211	-4.84	1.44	3.79	1.18	2.77	5.76
cg00863469	19	49116423	FAM83E	54854	2	blue	-2.01	22.1	11.9	18.5	-6.86	4.85	-3.98	-0.141	-7.83	-13.2	5.28	-10.2	3.92	-0.768	0.415	14	2.18	2.85	-1.29	-3.66	-2.51	3.65	-7.43	5.31	4.95	5.98	0.891	-0.666	3.3	5.56	2.89	0.0918	0.991	0.678	-1.95	0.889	1.77	13	9.22	0.924	-0.185	-7.15	-2.76
cg00863913	8	144939685		NA	2	blue	1.87	17.2	11.1	11.4	-7.34	1.31	-2.4	1.59	-2.38	-10.4	-0.436	-6.16	0.74	0.611	-0.539	10.5	2.39	7.11	1.92	-4.28	1.96	1.13	-3.61	4.28	2.35	3.37	3.6	0.571	3.36	2.32	2.2	0.496	0.968	0.385	-1.39	1.1	0.0559	10.2	6.8	-0.0677	-0.0114	-5.45	-1.84
cg00864691	16	84986179		NA	3	brown	-1.11	17.8	18	9.47	-10.9	4.8	-6.98	0.28	-2.72	-8.69	3.39	-2.54	-0.719	5.49	0.195	13.8	3.38	8.17	-1.01	-2.9	-0.717	1.71	-2.22	5.73	4.44	6.37	0.974	3.45	5.63	5.69	-0.302	-1.61	2.09	0.0832	-0.785	0.85	1.19	9.56	4.81	0.37	0.348	-3.19	-4.24
cg00864768	19	54692102	MBOAT7;MBOAT7;MBOAT7;MBOAT7	79143	5	green	0.436	-4.65	-7.4	2.71	19.9	4.72	11.9	6.44	1.12	9.74	2	1.24	15.1	-0.289	2.99	0.505	-0.825	-4.55	3.55	13.6	3.29	4	5.07	4.55	-0.0473	5.68	-0.709	4.42	3.42	2.6	3.93	5.24	0.55	1.51	1.41	-0.73	1.63	-3.37	1.23	3.17	1.38	3.32	7.3
cg00865541	18	56279934	ALPK2	115701	2	blue	1.39	20.2	13.9	11.5	-9.67	1.99	-4.17	1.46	-2.97	-11.8	0.125	-6	-0.0395	1.77	-0.312	11.7	2.1	7.6	1.5	-4.88	1.62	0.961	-3.61	4.74	1.65	4.19	2.93	1.72	3.39	2.79	1.25	-0.309	1.82	0.538	-0.623	0.252	-0.894	10.5	7.03	-0.732	0.293	-5.7	-3.14
cg00865962	1	110303483	EPS8L3;EPS8L3;EPS8L3	79574	8	pink	7.98	0.713	0.145	0.885	4	-2.17	6.83	18.2	6.42	3.94	-7.4	2.74	3.09	2.58	0.919	0.885	2.51	4.35	13.6	2.92	15.1	-4.22	10.8	5.99	-7.1	1.94	4.39	5.17	2.21	-6.8	-1.47	7.55	-0.23	0.304	0.472	1.7	-5.99	-4.73	-1.51	-0.182	-0.496	0.241	-0.0527
cg00867510	2	239930488		NA	2	blue	1.01	19.6	10.7	13.7	-8.27	1.63	-3.67	1.38	-4.71	-13.1	1.08	-9.1	1.59	-1.08	-1.51	9.87	2.61	5.01	1.43	-6.13	0.558	0.314	-5.54	4.13	2.61	2.94	3.56	-0.331	0.96	2.15	1.17	-0.131	-1.12	-1.47	-3.05	1.15	-0.0141	9.21	6.5	-1.71	-2.08	-5.62	-3.35
cg00869962	14	59238729		NA	8	pink	7.46	4.05	2.73	4.58	4.22	0.842	7.5	17.7	5.86	3.21	-3.13	1.97	6.02	3.83	2.55	4.98	3.95	6.09	13.5	4.6	10.7	-1.38	9.11	9.67	-2.06	4.83	4.49	6.87	4.72	-2.45	2	8.21	2.05	2.72	0.898	1.58	-2.85	-1.41	1.99	1.63	1.72	0.138	1
cg00870269	15	58782688	LIPC	3990	5	green	4.14	-8.97	-15.7	-0.463	21.3	-1.69	16.3	3.25	2.73	8.38	-2.62	-0.94	9.9	-6.69	2.99	-6.18	1.41	-6.94	4.44	7.2	3.77	-1.34	1.89	0.139	0.344	-3.22	0.0693	-1.07	-2.24	-1.63	2.64	2.95	-1.26	2.36	0.588	-1.63	0.933	-7.71	0.0636	2.11	0.372	2.48	5.44
cg00870837	16	1171361		NA	2	blue	-2.88	18	9.85	12.9	-9.92	1.99	-6.92	-1.16	-8.57	-16.9	3.11	-10.7	0.0437	-2.55	-1.59	9.02	-1.27	1.98	-1.88	-7.46	-2.91	3.75	-8.82	0.436	2.21	2.86	0.919	-3.58	-0.389	1.83	2.8	1.78	-0.833	-1.53	-2.61	0.321	-0.203	15.7	7.81	-1.75	-1.23	-8.56	-3.22
cg00871129	20	44176425	SPINLW1;SPINLW1	NA	3	brown	-3.28	19.8	18.6	9.64	-14.4	4.49	-10.2	-1.18	-5.12	-12.7	4.06	-4.49	-2.33	3.79	-1.64	13.2	0.229	6.79	-2.58	-5.37	-2.69	3.54	-4.78	2.82	3.21	6	1.04	1.12	3.55	4.74	0.819	-0.63	0.902	-0.919	-2	0.437	0.606	13.4	4.49	-0.984	-0.814	-4.15	-4.4
cg00871371	17	75371476	SEPT9;SEPT9;SEPT9;SEPT9;SEPT9	10801	3	brown	-2.32	19.6	18.9	10.8	-12.2	5.35	-8.51	-0.351	-4.59	-10.6	4.49	-4.16	-0.493	4.28	-0.736	13.8	2.13	6.87	-1.98	-4.34	-2.14	3.15	-3.67	3.75	5.36	6.16	1.29	0.987	4.42	5.64	0.741	-0.0719	1.94	0.648	-0.579	1.74	0.63	12.5	5.46	0.466	0.597	-4.18	-3.45
cg00871610	21	37093012	MIR802	768219	4	yellow	-4.63	18.7	10.1	19.7	-5.77	6.83	-4.97	0.0855	-10.9	-13.4	5.92	-11.6	5.42	-1.63	-0.292	13.8	-0.0244	0.107	-2.91	-2.52	-2.83	5.03	-8.2	2.88	4.13	7.23	-0.287	-0.945	3.36	5.69	1.86	1.22	-0.476	-0.908	-2.87	-0.185	0.798	13.2	7.93	0.559	-1.64	-6.12	-0.844
cg00872256	7	23243417		NA	2	blue	2.18	22.1	11.7	13.8	-8.95	1.56	-3.24	1.38	-3.45	-13.6	0.377	-8.38	0.881	-0.712	-0.755	10.4	2.69	6.78	2.33	-6.42	1.1	1.06	-5.43	4.24	3.39	2.79	4.28	-0.474	1.25	2.67	2.84	0.636	-0.604	-0.607	-2.49	0.958	-0.459	10.9	6.59	-0.557	-1.65	-5.64	-3.81
cg00873953	12	95010048	TMCC3	57458	2	blue	-2.63	25.7	14.7	15.3	-10.8	4.51	-6.76	-0.552	-7.57	-15.4	4.27	-8.88	1.23	0.453	-1	13.4	0.57	4.57	-1.7	-5.46	-2.31	3.95	-7.22	3.55	3.38	5.94	1.39	-0.102	2.34	4.86	2.31	-0.067	0.923	-0.193	-1.76	0.23	0.832	14.8	8.22	-0.595	-0.824	-5.85	-3.38
cg00874605	16	14569598	PARN;PARN	5073	2	blue	-1.21	25.6	12.9	17.4	-9	4.62	-4.79	-0.0435	-6.96	-15.1	3.72	-10.1	2.63	-0.666	-0.618	13	2.55	4.33	-0.92	-5.39	-1.49	2.47	-7.37	4.31	4.55	5.02	2.24	-0.702	2.24	5.17	1.78	-0.615	0.75	-0.384	-1.91	0.878	1.07	12.2	8.55	0.0978	-1.39	-6.96	-4.48
cg00875476	10	134521848	INPP5A	3632	2	blue	-3.22	23.1	13.5	14.6	-10.4	4.51	-6.85	-0.685	-8.02	-15.5	5.24	-8.83	1.08	0.217	-0.749	13	0.21	3.79	-1.82	-5.3	-3.3	4.38	-7.54	3.77	3.84	5.97	0.73	-0.146	2.39	4.84	2.7	0.381	0.619	-0.754	-1.19	0.88	1.28	14.6	7.34	-0.144	-0.454	-6.31	-3.34
cg00876376	1	45096728	RNF220	55182	2	blue	-3.1	26.1	13.8	16	-11	4.5	-7	-1.16	-8.7	-17.3	4.17	-10.2	1.26	-0.553	-1.18	12.9	0.253	3.55	-2.37	-6.04	-2.76	4.04	-8.54	2.95	3.61	5.42	1.33	-0.897	1.71	4.87	2.36	-0.19	0.278	-0.859	-2.29	0.227	0.805	15.2	8.06	-0.654	-1.22	-7.02	-3.72
cg00876757	16	33483591		NA	51	thistle1	-0.812	3.23	1.47	4.05	-1.04	1.18	-1.07	0.523	-2.69	-2.92	1.22	-3.31	1.54	-1.74	2.83	2.2	2.05	-0.88	-0.518	-1.83	-0.244	-0.138	-2.02	0.938	1.79	0.546	-1.66	-1.1	-0.534	0.564	-0.866	0.588	1.92	2.92	-1.02	2.54	-4.47	1.9	3.45	3.5	-1.24	-4.7	-1.6
cg00878533	1	2848864		NA	8	pink	2.27	0.802	0.889	1.71	4.33	1.95	4.21	19.7	3	4.06	-1.55	2.96	4.68	4.04	0.622	2.53	-2.77	2.34	10.6	5.33	8.54	2.47	10.1	5.43	-6.99	6.88	2.04	5.51	3.58	-4.59	2.44	14.2	2.02	1.45	2.35	2.17	-5.57	-0.546	0.0214	0.265	1.47	0.259	1.82
cg00879786	2	240239755	HDAC4	9759	2	blue	3.38	18.7	10.8	12.3	-8.13	0.789	-1.83	1.56	-2.17	-12	-0.848	-7.65	0.688	-0.679	-0.611	10.4	3.45	7.09	2.7	-5.36	2.17	-0.514	-4.52	4.34	2.37	2.1	4.53	-0.145	2.43	2.03	1.55	-0.669	-0.408	-0.311	-2.09	0.285	-0.356	8.36	6.24	-1.1	-1.59	-5.99	-4.51
cg00880872	9	124887818		NA	5	green	1.57	-4.55	-8.4	3.32	21.4	3.51	13.8	5.76	1.3	8.97	0.356	0.29	15.9	-1.78	3.72	-0.00213	-0.416	-4.79	3.87	12.3	4.21	2.85	4.13	3.71	-0.611	4.19	-0.536	1.87	2.59	2.15	3.75	4.36	0.31	1.27	1.61	-0.748	-0.159	-3.96	1.4	3.77	0.686	2.2	6.55
cg00881207	7	2728912	AMZ1	155185	3	brown	-2.63	16.6	17.4	9.23	-11	5.23	-7.72	-0.444	-3.79	-9.23	4.01	-2.98	-0.945	5.03	-1.37	13.5	2.02	6.9	-2.2	-2.89	-1.67	2.92	-3.07	4.46	3.91	6.73	1.11	2.76	5.45	5.51	0.242	-1.04	2.41	0.612	-1.19	0.422	1.25	10.3	5.1	0.318	0.15	-2.94	-3.23
cg00882967	21	44484325	CBS	875	2	blue	-1.81	25.7	16.9	14.3	-11.3	4.66	-7.16	-0.166	-5.97	-13.4	4.21	-7.16	0.859	2.07	-0.266	14.5	3.1	5.79	-1.51	-5.06	-1.72	2.18	-5.44	5.19	4.97	5.86	1.32	0.904	3.47	5.32	0.688	-1.04	1.07	-0.092	-2.06	1.28	1.32	12.5	7	0.568	-0.673	-6.06	-4.01
cg00883689	2	54802904	SPTBN1;SPTBN1	6711	5	green	2.44	-7.64	-12	0.319	23.1	1.58	15.5	4.47	2.73	10	-0.0408	0.971	12	-3.42	2.48	-3.46	-0.416	-5.7	4.26	10.3	3.08	1.96	3.52	1.84	-0.346	1.06	0.383	1.01	0.0603	0.657	4.38	4.24	0.227	2.15	2.04	-0.262	0.81	-5.42	0.531	2.63	1.22	3.18	6.13
cg00883798	3	176223775		NA	2	blue	-3.79	20.1	13	16.4	-7.17	6.48	-5.84	0.784	-8.04	-11.5	5.64	-8.18	3.91	1.3	-0.402	14.5	0.0754	2.99	-2.07	-2.46	-2.35	5.19	-5.71	4.48	3.47	8.52	0.42	0.577	4.34	5.6	2.09	0.973	1.3	-0.113	-1.64	0.583	0.455	13.1	7.67	0.54	-1.24	-5.15	-2.36
cg00885918	20	30406997	MYLK2	85366	3	brown	-2.96	18.4	19.2	10.2	-12.9	4.8	-9.41	-0.437	-5	-10.7	4.37	-3.94	-1.06	4.67	-0.535	14.5	2.28	6.25	-2.61	-4.02	-2.22	2.14	-3.4	4.71	3.76	6.7	0.561	1.18	5.16	4.78	-0.904	-1.55	1.86	-0.0762	-1.17	1.73	0.37	10.6	5.15	0.305	0.0436	-4.53	-4.6
cg00886669	2	11529264		NA	5	green	1.48	-11.9	-7.49	-6.22	15.6	2.25	10.3	3.48	7	18.1	0.00549	9.82	5.5	3.85	3.48	-2.8	0.274	-1.65	2.63	14.7	2.99	1.06	9.25	2.33	-0.445	2.27	-1.6	5.07	5.1	1.42	1.15	2.1	2.31	2.45	3.48	-0.336	-1.15	-8.32	-3.86	4.16	3.44	7.88	5.9
cg00887255	6	31600560	BAT2	NA	5	green	3.38	-5.24	-8.18	1.87	20.5	2.07	14.6	4.45	3	9.44	-0.227	1.31	12.8	-1.54	3.37	-0.352	2.27	-3.54	4.03	11.8	4.08	0.913	4.02	5	0.84	2.74	0.559	2.33	2.57	2.1	2.94	2.29	0.408	1.84	1.88	-0.164	1.19	-5.15	0.725	3.19	1.42	2.07	5.51
cg00888818	13	103019936	FGF14	2259	8	pink	1.7	0.474	1.56	1.15	4.58	3.22	3.8	17.4	3.05	5.21	-1.09	4.51	4.86	5.48	1.71	3.3	-1.09	2.61	8.59	6.69	8.12	1.52	10.7	5.8	-5.55	7.79	0.576	6.18	4.85	-3.28	-0.0651	11	1.7	0.798	2.61	2.59	-3.67	-1.91	-1.3	1.56	1.72	1.63	3.05
cg00889627	1	1959630	GABRD	2563	5	green	-0.776	-9.64	-15.1	-0.389	21	1.85	11.3	0.731	-0.497	8.29	1.9	-0.553	10.7	-5.45	2.21	-5.37	-2.47	-9.55	0.341	8.76	-0.592	3.26	0.384	-1.16	-0.00486	0.0718	-1.96	-1.86	-1.86	1.27	3.95	3.04	-0.356	1.59	1.22	-0.268	0.775	-4.06	0.33	2.56	0.689	2.04	6.1
cg00889709	8	59043471	FAM110B	90362	2	blue	-4.47	22.1	12.5	15.8	-9.37	5.96	-7.92	-1.15	-9.68	-14.6	5.61	-9.68	2.43	0.173	-1.41	12.4	-0.565	2.26	-3.44	-4.72	-3.43	4.96	-7.88	3.02	3.18	7.1	0.376	-0.832	1.7	5.77	1.84	-0.109	0.956	-1.07	-1.65	0.643	1.03	14.3	8.18	-0.714	-1.12	-5.65	-3.45
cg00890145	1	145028465	PDE4DIP	9659	5	green	-0.765	-2.3	-7.3	5.75	15.6	4.1	9	3.48	-2.34	5.55	2.23	-3.31	17.8	-3.71	3.28	0.429	-1.1	-6.9	0.931	8.51	1.62	3.56	0.573	2.05	0.214	4.16	-1.47	-1.42	0.00386	2.61	3.12	3.43	-0.945	-0.34	-0.614	-0.105	0.768	-1.98	2.67	3.45	-0.991	1.23	4.08
cg00890916	20	30158833		NA	2	blue	-1.08	26.8	16.7	13.9	-11.6	3.93	-7.12	-0.277	-5.23	-13.7	3.89	-6.98	0.293	2.05	-0.727	13.2	3.24	6.6	-0.989	-6	-1.72	2.1	-5.44	5.84	4.58	5.31	2.39	1.35	2.66	5.02	1.47	-1.42	1.61	0.443	-1.7	0.917	1.16	12.1	7.25	0.202	-0.439	-5.91	-4.51
cg00891025	8	21915184	EPB49;EPB49;EPB49;EPB49	NA	5	green	2.8	-5.77	-10.9	2.13	22.8	1.95	14.9	4.49	2.08	9.24	0.686	-0.106	14.1	-3.44	3.15	-2.09	0.563	-5.45	4.35	10.3	2.94	2.25	2.98	4.41	0.275	2.01	0.427	1.35	0.461	1.67	5.36	3.5	0.185	2.22	1.47	0.689	0.781	-4.49	1.16	3.15	1.33	2.32	5.43
cg00891611	1	108066602		NA	3	brown	-3.25	13.1	19.6	7.56	-9.7	6.08	-7.82	0.708	-2.91	-5.9	4.72	-0.00541	-0.932	8.29	-1.04	16	1.07	7.93	-2.18	-0.0192	-1.48	3.74	-0.156	4.88	3.28	8.99	0.735	3.87	10.3	5.36	-0.378	-0.0285	2.98	0.163	0.285	2	-0.679	10	3.32	0.521	1.14	-2.45	-1.53
cg00893424	13	23919407	SACS	26278	4	yellow	1.27	17.4	8.89	16.2	-4.13	4.31	-0.265	2.22	-4	-10	2.12	-8.38	4.86	-0.909	-0.567	11.8	2.23	4.72	2.07	-2.26	0.823	3.04	-4.89	5.57	3.79	4.84	4.39	0.628	3.4	4.7	4.4	1.38	0.708	0.154	-1.03	0.589	1.04	10.4	8.12	-0.086	-0.585	-5.7	-1.76
cg00894252	1	156781025	SH2D2A;SH2D2A;SH2D2A;SH2D2A;SH2D2A	9047	3	brown	-1.94	11.8	21.2	5.04	-9.44	6.11	-6.94	0.413	0.281	-3.27	4.72	3.45	-1.92	12.3	0.248	14.8	2.35	10.8	-1.34	0.961	-1.45	3.9	1.76	7.5	3.91	9.69	1.25	7.03	10.3	6.56	0.922	-1.29	4.74	2.1	0.68	1.17	0.915	8.65	2.53	1.44	2.66	1.11	-1.95
cg00897875	17	43392165	MAP3K14	9020	3	brown	-1.52	16.4	18.3	9.24	-11.6	4.29	-7.54	-0.317	-3.35	-8.79	3.74	-2.9	-1.19	5.1	-0.889	13.9	2.48	7.03	-1.68	-3.3	-1.65	1.84	-2.54	4.5	3.92	5.8	1.55	2.65	6.05	4.72	-0.282	-1.58	2.21	0.165	-0.256	1.65	0.451	9.79	4.65	0.126	1.05	-4.94	-3.63
cg00898190	14	22941183		NA	8	pink	7.14	2.58	1.54	2.81	3.93	-0.525	6.78	21.3	5.48	3.37	-3.35	2.27	4.52	3.13	1.51	3.21	2.49	4.83	15.2	3.57	10.5	-1.43	9.96	9.29	-4.17	4.08	4.53	5.77	3.44	-5.26	2.21	10.4	1.34	2.1	1.88	2.81	-4.78	-1.92	0.699	0.804	1.49	-0.169	0.807
cg00898274	10	88448035	LDB3;LDB3;LDB3;LDB3;LDB3;LDB3	11155	2	blue	-4.37	17.6	14.3	11.2	-10.9	6.03	-8.69	-1.3	-7.28	-12.1	5.29	-5.97	0.246	2.33	-1.7	12.9	-0.442	3.7	-3.51	-3.63	-3.33	4.37	-5.71	2.73	2.93	6.96	0.388	0.645	3.71	5.67	0.853	-0.656	1.27	-0.537	-0.29	0.599	-0.0383	12.6	6.25	-1.22	-0.598	-4.36	-3.72
cg00898374	13	112688766		NA	10	purple	3.01	-12	-4.37	-11.3	7.7	-0.0811	5.31	3.19	10.6	18	-1.54	15.5	-0.203	7.46	2.53	-5.25	1.92	1.97	3.09	8.13	3.44	-1.34	12.4	2.18	-0.936	-0.00234	-0.497	5.95	2.71	-0.379	-0.76	0.629	3.08	3.82	3.69	1.58	-1.17	-10.1	-7.1	3.3	3.92	8.81	3.4
cg00898683	2	25474675	DNMT3A;DNMT3A;DNMT3A	1788	10	purple	3.74	-9.24	-5.32	-5.66	12.4	1.54	8.89	3.98	8.37	17.6	-0.931	9.69	5.21	4.85	2.48	-3.16	2.98	0.479	3.82	10.9	4.04	-1.06	10.2	4.16	0.528	1.15	0.774	5.46	3.51	1.4	0.603	0.7	1.15	1.61	2.66	0.817	0.284	-9.28	-4.33	3.18	2.73	8.56	5.43
cg00900226	4	15161468		NA	2	blue	-2.33	26.8	14.6	15.6	-11.2	4.27	-6.75	-0.527	-7.53	-16.5	3.96	-9.34	0.979	0.0512	-0.493	13.4	0.937	4.59	-1.58	-5.9	-2.17	3.43	-7.45	3.52	3.69	5.45	1.17	-0.23	2.33	4.72	1.99	-0.238	0.565	-0.357	-2.05	0.526	0.954	14	7.53	-0.0194	-0.998	-6.78	-3.91
cg00900231	16	50897271		NA	4	yellow	-0.474	17.5	9.05	15	-6.64	2.69	-3.27	-0.387	-6.49	-13.2	2.52	-10.5	2.41	-2.72	-0.907	10.5	3.27	2.7	-0.532	-5.1	-1.12	1.56	-7.6	3.47	5.48	2.49	2.36	-1.97	1.67	3.49	2.15	0.3	0.272	0.406	-1.88	-0.0283	0.757	11.3	8.86	-0.616	-0.876	-6.44	-2.99
cg00900933	17	37322028	ARL5C;ARL5C	390790	4	yellow	-1.6	16.1	8.47	19.8	-2.57	5.02	-1.14	1.92	-7.09	-9.67	4.14	-9.99	7.21	-1.31	-0.571	13.7	1.7	1.12	-0.188	-0.469	-0.535	3.53	-5.64	5.01	3.96	6.84	1.78	-0.401	4.85	4.69	2.43	1.65	-0.212	-1.18	-2.23	0.445	0.507	10.2	8.78	1.07	-1.68	-5.84	-0.0744
cg00901375	X	119445864	FAM70A;FAM70A;FAM70A	NA	2	blue	-1.91	17.4	14.8	12.3	-7.91	5.5	-4.79	1.13	-4.36	-9.13	3.73	-4.71	1.75	3.29	0.816	14.6	1.34	5.63	-0.73	-1.7	-0.72	3.53	-3.19	4.39	3.5	7.06	0.383	2.43	5.84	5.14	1.42	0.696	2.2	0.438	-0.396	-0.449	-0.0471	11.4	6.54	2.77	-0.0403	-4.03	-0.944
cg00901675	13	30728236		NA	5	green	2.04	-9.6	-6.35	-4.43	15.9	3.22	10.9	5.43	7.33	17.6	1.1	9.68	6.76	4.66	3.53	-1.58	0.137	-0.556	4.24	15.4	3.41	2.6	10.5	4.68	-0.244	4.01	-0.628	6.31	5.49	2.02	3.33	3.89	4.05	4.17	4.61	1.25	-0.0649	-6.44	-2	4.43	5.1	7.52	6.38
cg00901980	22	33453022	SYN3	8224	5	green	2.18	-7.41	-9.18	-0.829	18.3	3.06	12.1	4.24	3.63	11.8	-0.00022	3.52	10.7	-0.15	3.39	-2.65	-0.439	-3.65	3.41	11.5	3.53	2.18	5.38	2.65	-0.674	2.87	-0.183	2.78	1.43	2.55	3.08	2.7	1.75	2.22	3.32	0.253	0.0675	-5.83	0.18	3.6	1.71	4.97	6.34
cg00904548	3	49720819	APEH	327	5	green	0.954	-8.56	-11.4	0.12	25.4	3.07	14	3.6	2.21	11.6	1.18	2.02	12.8	-2.1	2.84	-2.51	-0.427	-5.99	2.58	13.1	2.05	2.55	3.75	2.33	-0.081	2.59	-0.852	1.27	1.79	2.08	3.52	3.16	0.851	2.14	2.57	-0.111	1.08	-5.96	0.108	3.21	1.8	4.08	7.05
cg00904852	10	132001604		NA	5	green	3.28	-7.18	-11	0.749	24.3	1.65	16.3	5.17	3.26	10.9	-0.422	1.43	12.9	-2.43	3.47	-2.55	1.08	-4.61	4.68	11.8	3.98	1.01	4.39	3.32	-0.0323	1.64	0.297	1.51	1.39	0.925	3.33	3.54	0.35	2.54	1.99	0.672	0.471	-6.17	0.00854	3.5	1.61	3.17	6.19
cg00906420	3	78917133	ROBO1;ROBO1;ROBO1;ROBO1	6091	3	brown	1.06	20.9	16	10.5	-10.8	3.4	-5.01	0.268	-1.61	-10.6	2.35	-4.33	-0.833	3.19	-0.784	12.8	2.68	10.3	1.15	-4.54	-0.512	2.43	-3.65	5.31	4.55	4.66	4.1	2.31	3.75	5.02	3.24	-0.5	2	1.15	-0.702	1.08	1.09	12	6.3	-0.0537	0.765	-3.36	-3.14
cg00907267	12	56474771	ERBB3;ERBB3	2065	2	blue	-1.49	24.1	13.4	16.2	-8.74	4.48	-5.04	2.46	-6.62	-13.9	2.92	-8.71	2.46	0.255	-0.613	13.7	0.945	4.26	0.393	-4.33	0.144	3.02	-5.21	4.01	2.57	6.29	1.92	0.495	2.83	3.39	1.65	2.22	0.535	-0.383	-1.33	1.13	-0.378	12.7	7.88	-0.603	-0.8	-6.38	-3.25
cg00908292	17	38699009		NA	10	purple	1.36	-13.1	-6.89	-7.73	13.6	2.2	8.2	3.59	7.47	20.1	0.107	11.1	4.09	4.67	2.81	-3.51	1.17	-1.49	2.3	13.4	2.79	0.134	10.3	2.44	0.0563	1.49	-1.56	5.2	5.22	0.999	0.031	1.84	1.41	1.98	3	1.17	-0.797	-9.92	-5.87	3.94	2.71	8.32	4.78
cg00908601	X	70323289	FOXO4;FOXO4	4303	3	brown	-2.37	17.4	17	9.09	-13.3	3.93	-9.14	-0.992	-4.88	-11.2	3.94	-4.36	-1.91	3.65	-1.33	12.5	2.48	5.97	-2.49	-4.99	-2.32	1.66	-4.02	4.13	3.82	5.29	1.11	1.9	3.99	4.42	-0.78	-2.06	1.32	-0.428	-1.62	1.22	0.347	9.89	4.45	0.298	-0.556	-4.64	-3.63
cg00909226	1	11182094	MTOR	2475	2	blue	-4.77	20.7	12.2	15.6	-7.9	6.73	-7.12	-0.737	-9.31	-12.4	6.29	-8.54	3.54	0.838	-0.61	13.2	-0.173	2.07	-3.43	-3.17	-3.41	5.11	-6.94	3.51	3.8	8.01	-0.16	0.0758	2.81	6.13	1.61	0.03	0.217	-2.08	-1.98	1.26	0.569	13.9	7.36	0.246	-1.28	-5.43	-2.84
cg00909286	3	149889135		NA	2	blue	-2.4	25	12.6	18.6	-8.2	5.26	-5.16	0.0724	-8.3	-14.9	4.5	-10.4	3.51	-0.619	-0.406	13.9	1.88	3.01	-1.58	-4.49	-1.87	3.35	-7.63	4.62	4.22	6.3	1.21	-0.297	2.52	5.39	1.74	-0.256	0.216	-0.665	-2.08	0.873	0.721	12.6	8.37	0.297	-1.5	-6.68	-3.58
cg00909401	2	43328657		NA	2	blue	0.112	22.7	12.6	14.6	-9.72	2.87	-5.33	0.939	-5.33	-14	0.945	-8.56	1.2	-0.187	-0.169	11	1.47	5.35	0.169	-6.3	0.817	1.7	-5.41	3.13	1.97	4.02	2.06	-0.993	1.45	3.22	1.2	0.158	-0.179	-0.623	-2.31	1.39	-0.569	11.3	6.63	-0.162	-1.4	-6.49	-4.38
cg00909706	1	9211836	MIR34A	407040	13	salmon	0.881	0.24	-4.08	7.37	14.5	4.7	9.97	5.71	-1.07	4.99	3.53	-2.4	17.4	-1.39	2.96	3.68	0.895	-3.7	3.24	10.1	2.07	3.51	1.92	6.75	1.42	6.44	0.583	2.18	3.07	3.39	4.21	4.05	0.143	-0.195	0.244	0.0104	0.702	-0.488	3.6	3.65	0.123	-0.277	4.85
cg00910203	17	21276802		NA	5	green	3.45	-9.21	-12.5	-1.44	22.1	0.128	15.5	4.79	3.82	11.5	-1.54	2.24	9.95	-2.78	2.81	-4.63	0.49	-5.13	4.62	10.2	4.33	-0.0259	4.84	1.85	-1.35	-0.0019	0.299	1.2	0.18	-0.702	2.52	3.29	0.257	1.99	2.01	-0.645	-0.024	-7.75	-0.715	2.69	1.58	3.01	6.2
cg00910893	15	78286548	LOC91450	91450	3	brown	-0.743	17.4	22.8	7.79	-14.2	3.93	-8.62	-0.486	-1.89	-8.85	3.24	-1.61	-2.94	6.57	-0.824	13.9	4.91	9.39	-1.48	-3.93	-1.05	0.246	-1.49	5.96	4.89	5.44	1.81	3.76	5.91	5.08	-1.54	-3.04	3.08	1.22	-0.161	1.58	1.83	8.21	4.57	-0.0519	1.41	-3.5	-4.42
cg00911962	X	118780518	SEPT6;SEPT6;SEPT6;SEPT6	23157	1	turquoise	15.1	1.26	0.656	-0.423	0.496	-5.95	7.33	7.68	10	1.5	-14.7	1.93	-0.683	1.04	1.66	-0.401	7.77	7.83	11	-0.764	17.3	-11.4	6.89	4.53	-4.75	-3.64	6.1	3.61	0.673	-5.03	-4.63	-1.63	-0.412	1.04	-0.114	-0.387	-2.72	-7.62	-1.38	-0.772	-1.01	-0.027	-2.57
cg00912580	2	135169533	MGAT5	4249	4	yellow	-3.09	12.2	5.39	17.8	-0.384	7.51	-0.738	0.724	-7.86	-7.51	5.43	-9.62	9.3	-2.12	1.14	10.7	0.203	-0.758	-1.68	0.654	-1.56	5	-6.04	3.65	4.12	7	-0.241	-1.92	2.66	6.85	3.07	1.26	0.00461	-0.865	-2.23	1.77	1.01	8.94	7.44	2.23	-1.68	-4.62	-1.12
cg00912598	2	25475287	DNMT3A;DNMT3A;DNMT3A	1788	10	purple	2.41	-10.1	-3.53	-8.84	8.48	1.21	5.01	2.59	8.97	18.2	-0.504	12.6	1.79	7.19	1.85	-3.87	1.71	1.6	2.19	9.71	2.69	-0.726	11	2.66	-0.438	1.16	-0.342	6.25	3.2	0.893	-0.421	0.028	2.13	2.06	2.65	0.232	0.348	-8.91	-5.38	2.19	3.38	8.79	4.02
cg00912772	12	95594566	FGD6	55785	10	purple	2.86	-14.9	-7.72	-9.59	14.6	1.24	9.39	3.35	10.1	24.7	-0.638	13	3.45	5.17	2.44	-5.39	0.613	-0.0643	3.49	12.8	3.09	0.283	11.5	1.81	-0.555	0.657	-0.166	5.07	3.54	0.9	1.34	1.77	2.41	2.78	3.58	1.22	0.0846	-10.5	-5.89	3.65	3.42	8.5	5.74
cg00912946	1	156019986	UBQLN4	56893	2	blue	-2.4	17.4	10.7	12.4	-8.31	4.33	-5.38	-1.15	-6.25	-12.5	4.12	-7.49	1.43	0.128	-1.4	10.6	-0.249	3.92	-1.72	-4.32	-2.64	3.97	-6.66	2.51	2.89	5.24	1.51	-0.713	1.58	5.14	2.51	-0.299	1.5	-0.315	-0.579	-0.179	1.6	12.6	7.51	-1.49	-0.428	-5.15	-3.29
cg00913604	16	66958650	RRAD;RRAD	6236	2	blue	-2.65	16.7	18	10.5	-8.41	7.01	-5.77	0.0632	-3.26	-7.18	6.91	-2.11	1.08	6.42	-1.38	17.3	1.6	7.29	-1.41	-0.0738	-2.98	5.65	-2.23	7.38	5.53	9.62	2.17	4.9	8.25	7.79	3.29	0.0073	4.15	1.92	0.811	2.07	2.39	12.6	6.61	0.291	2.81	-3.22	-1.43
cg00913954	1	36852956	STK40	83931	5	green	2.47	-8.73	-8.76	-2.29	17.5	2.68	12.7	4.35	5.18	13.6	-0.247	4.98	8.65	0.308	3.11	-2.36	0.107	-2.84	3.91	12.7	3.6	1.91	6.46	2.61	-0.0594	2.06	-0.0581	4	3.35	1.89	3.48	3.19	1.72	3.21	3.85	0.38	0.154	-6.49	-1.28	3.11	3.06	5.03	6.34
cg00914146	1	240260050	FMN2	56776	7	black	5.83	-5.67	-11.5	1.1	17.5	-0.71	16.4	4.36	3.86	7.46	-3.02	-1.04	10.6	-5.29	2.47	-4.06	1.28	-3.9	6.03	6.49	5.1	-0.545	2.63	1.68	-0.0969	-1.75	2.24	-0.604	-1.56	-0.242	4.33	2.93	-1.63	1.02	0.512	-0.132	0.506	-6.26	0.293	2.06	-0.0157	1.97	5.02
cg00915372	17	75209460	SEC14L1;SEC14L1;SEC14L1;SEC14L1;SEC14L1	6397	5	green	2.95	-7.11	-9.91	0.35	19.6	1.39	14.1	3.89	2.89	10.1	-0.565	1.41	11.3	-2.38	4.13	-2.21	0.953	-4.74	3.62	10.4	3.55	0.891	4.07	3.11	-0.394	1.67	-0.704	1.46	1.19	1.26	2.77	2.22	1.86	2.58	2.81	-0.293	1.63	-6.28	1.19	4.33	1.78	1.56	5.72
cg00915556	1	25895276	LDLRAP1	26119	4	yellow	-0.31	18.1	10.9	18.1	-2.74	5.97	-0.346	4.06	-4.49	-7.89	4.56	-6.6	6.95	1.43	1.36	16.6	2.9	3.84	1.87	0.807	0.578	3.72	-3.04	8.19	4.68	8.55	1.89	1.84	6.5	5.39	3.16	2.75	1.94	1.25	0.676	2.67	0.469	9.8	8.39	2.3	1.23	-4.46	-1.48
cg00916854	12	123350361	VPS37B	79720	4	yellow	0.307	16.1	8.29	17.4	-1.45	5.5	0.123	3.69	-4.38	-6.62	3.66	-7.44	8.41	0.518	2.16	12.7	2.5	3.13	1.86	0.481	1.09	3.57	-2.81	8.14	3.63	8.17	1.35	1.86	4.25	5.46	3.35	1.91	0.853	-0.281	-0.387	2.16	1.42	8.55	8.36	2.39	0.307	-3.41	-0.219
cg00917251	1	24829987	RCAN3	11123	2	blue	-1.75	16.2	17.7	10.8	-7.6	6.49	-4.77	2.5	-2.72	-6.55	4.75	-1.91	1.81	6.64	0.0136	17.5	1.83	7.36	-0.00786	0.707	-0.405	4.07	-0.616	7.33	3.58	10.2	1.43	5.7	9.03	6.05	1.41	0.859	2.79	0.0866	0.307	1.61	0.901	10.2	5.11	0.955	1.36	-2.41	-0.933
cg00918130	19	618324	POLRMT	5442	5	green	4.2	-5.1	-9.91	2.06	18.6	0.361	15.2	4.78	2.5	7.79	-1.79	-0.681	12.4	-3.94	2.48	-2.12	0.761	-4.36	4.99	8.55	4.88	0.422	2.98	3.01	-0.846	0.785	1.57	0.518	0.0695	0.302	3.44	2.91	-0.105	1.6	1.06	-0.444	0.42	-5	1.46	2.03	0.49	1.58	5.51
cg00918944	9	35908117	LOC158376	NA	10	purple	1.2	-12.6	-4.48	-10.5	9.8	1.97	5.11	2.55	9.04	22.9	0.375	15.2	1.9	8.42	1.38	-4.45	0.784	0.922	1.53	11.4	2.06	0.657	12.2	2.42	-0.647	2.06	-0.496	6.68	3.77	1.36	-0.00323	0.762	4.5	4.37	4.49	1.25	-0.208	-8.82	-4.74	2.02	5.43	10	4.87
cg00919591	22	23524136	BCR;BCR	613	5	green	3.81	-5.8	-9.99	0.983	18.3	0.314	12.8	4.72	2.83	9.55	-1.1	0.0754	12.4	-3.06	3.2	-3.35	1.29	-4.44	4.59	7.86	4.26	0.261	4	2.85	-0.0583	0.381	0.598	0.778	-0.875	0.213	3.16	3.17	-0.895	1.12	-0.175	-0.253	0.946	-5.78	0.525	2.41	0.127	3.13	4.49
cg00919921	10	465584	DIP2C	22982	8	pink	8.21	2.02	0.52	3.33	6	0.199	9.17	18.4	6.44	4.31	-3.96	1.83	6.33	2.36	2.83	3.09	3.61	5.06	14.3	4.96	11.8	-1.93	9.38	8.82	-3.16	3.83	4.14	5.43	3.8	-3.39	1.83	8.18	1.59	2.42	1.53	2.17	-3.37	-3.04	1.02	1.74	2	0.47	1.4
cg00921160	14	97129452		NA	4	yellow	-0.566	17.8	8.28	18.8	-4.05	4.19	-1.37	0.463	-6.7	-11.8	3.45	-11.1	5.72	-2.29	-0.355	12.2	2.67	2.22	-0.144	-2.59	-0.93	2.71	-7.18	5.32	4.54	5.16	2.36	-0.881	2.88	5.18	2.78	-0.0945	0.349	-0.139	-1.85	0.713	1.32	10.4	9.67	0.0357	-0.817	-6.26	-1.63
cg00922281	16	87715775	JPH3	57338	5	green	2.36	-12.6	-6.48	-7.65	13.4	1.69	10.2	3.81	9.11	19.2	0.00645	11.5	3.94	4.96	1.92	-3.12	0.331	-0.0336	3.77	13.8	2.72	1.28	10.3	2.41	0.259	1.62	0.435	6.07	5.36	1.23	2.56	2.72	3.47	3.87	4.97	-0.0182	0.195	-8	-4.08	3.07	4.67	8.23	6.5
cg00922522	12	130918862	RIMBP2	23504	5	green	0.499	-14.7	-9.63	-6.9	18.2	2.46	10.1	3.05	6.01	19.8	1.08	9.32	6.17	2.91	2.63	-4.49	-0.744	-3.48	1.93	14.7	1.67	2.05	8.49	1.45	-0.11	2.03	-1.87	4.13	3.74	1.43	1.78	2.88	2.84	3.27	4.37	0.356	0.495	-8.57	-3.31	4.01	3.77	8.2	7.88
cg00924575	5	76474673		NA	2	blue	1.1	22.1	13.1	12.6	-10.8	2.09	-5.17	0.424	-3.92	-13.6	0.94	-7.72	-0.00498	0.336	-0.485	10.5	1.93	6.7	0.791	-6.83	0.237	1.29	-5.27	3.86	2.31	3.45	2.94	-0.151	1.36	3.18	1.85	-0.805	0.51	-0.206	-1.42	0.922	-0.626	10.9	7.11	-0.88	-0.868	-6.48	-5.15
cg00924855	22	41458255		NA	3	brown	-1.65	17.7	20.1	8.38	-13.5	4.43	-9.03	-0.791	-2.82	-9.48	3.49	-2.51	-2.2	5.67	-1.35	13.2	1.56	8.84	-1.81	-4.17	-1.65	2.73	-2.43	4.04	3.32	6.24	1.98	2.47	4.69	5.29	0.553	-1.62	1.7	-0.068	-1.22	1.48	0.181	11	3.84	-0.386	0.492	-2.94	-2.94
cg00925054	1	85220019		NA	5	green	1.13	-8.24	-10.5	-0.581	20.3	2.21	12.3	3.98	2.16	11.8	0.281	2.48	11.2	-1.48	2.66	-3.08	-1.14	-5.76	2.73	11.3	2.87	2.11	4.6	1.8	-1.53	2.14	-0.747	1.23	1.15	1.09	2.77	3.29	1.01	0.836	2.94	0.227	-0.58	-5.84	0.17	3.68	1.61	2.81	6.8
cg00925950	16	67946188	PSKH1	5681	2	blue	3.11	18.3	11.2	10.9	-8.77	0.577	-3.05	0.873	-1.87	-11.1	-0.704	-6.36	0.0158	0.367	0.00367	9.3	3.61	7.6	2.18	-5.98	2.04	-0.415	-3.85	5.07	2.08	2.37	4.01	0.713	1.32	2.4	1.4	-1.61	1.19	0.628	-0.852	1.62	-0.272	8.14	7.02	-0.722	0.408	-5.48	-4.39
cg00926318	20	25177340	ENTPD6;ENTPD6	955	10	purple	4.06	-8.8	-8.45	-2.56	18.1	1.71	12.9	4.18	6.42	15.3	-0.754	5.13	9.3	0.886	2.83	-3.33	2.15	-1.81	4.4	11.5	4.07	0.387	6.85	3.15	1.16	0.78	1.19	3.45	2.41	1.87	3.04	2.25	0.557	2.32	1.87	-0.165	0.0876	-7.88	-2.14	3.57	1.69	6.85	6.43
cg00927666	7	28319589	LOC402644	402644	2	blue	3.12	18.6	9.87	12.3	-7.62	0.785	-2.22	1.68	-2.28	-11.5	-0.201	-7.54	1.36	-0.444	-0.271	9.02	3.06	7.11	2.99	-5.77	1.73	-0.0548	-4.46	5.15	1.96	2.68	4.52	0.283	0.708	2.21	2.19	-0.58	-0.268	-1.16	-1.84	0.508	0.224	8.37	6.55	-0.676	-1.96	-4.57	-3.7
cg00928751	17	68172571	KCNJ2	3759	2	blue	-2.8	22.9	13.3	14.1	-11.6	3.69	-7.49	-0.766	-8.08	-17.2	3.64	-9.66	0.273	-0.542	-1.18	11.8	0.00923	3.55	-2.06	-6.48	-2.35	3.19	-7.8	2.36	2.68	5.01	0.946	-0.917	1.32	3.75	1.28	-0.108	0.199	-1.09	-1.91	0.732	0.439	13.4	7.11	-0.722	-1.49	-6.88	-4.07
cg00930606	22	31740944	PATZ1;PATZ1;PATZ1;PATZ1	23598	4	yellow	-1.46	17.4	9.23	18.4	-2.81	5.68	-1.7	2.34	-6.55	-8.4	4.58	-8.56	7.52	0.0998	0.366	13.7	1.72	2.31	0.249	-0.251	-0.339	4.12	-4.54	6.6	4.07	7.64	1.69	1.08	4.56	5.49	3.27	1.65	0.0286	-0.866	-2.56	-0.123	0.455	10.7	8.38	0.98	-1.28	-4.61	-1.28
cg00931520	16	1231484	CACNA1H;CACNA1H	8912	16	lightcyan	0.048	17.1	11.4	14.6	-5.44	3.28	-2.77	1.82	-4.39	-8.95	2.57	-6.48	3.83	1.43	1.58	13	3.04	4.33	0.578	-2.27	0.367	1.89	-3.6	6.2	3.5	6.04	1.04	0.13	4.34	3.99	1.36	0.396	1	-0.307	-1.31	1.84	0.544	8.96	6.71	1.92	-0.711	-5.1	-2.31
cg00931944	8	1310046		NA	5	green	3.48	-4.93	-7.8	1.36	17.7	0.776	14.2	11.5	3.24	8.69	-1.57	1.45	10.7	-1.32	2.72	-0.873	-1.34	-3.24	8.64	10.2	6.91	1.84	7.12	4.48	-4.24	3.19	0.727	2.63	2.29	-2.91	4.49	9.33	-0.366	1.05	1.64	0.437	-3.1	-4.09	-0.25	2.64	1.12	0.672	5.69
cg00932104	1	19972707	NBL1;NBL1	4681	10	purple	2.17	-10.2	-2.97	-9.45	8.36	1.78	5.43	3.67	9.65	18.9	0.155	15.5	1.21	9.06	3.11	-3.17	1.46	2.23	3.02	10.4	2.68	0.683	13	3.99	0.188	2.47	-1.05	8.75	4.48	1.3	0.941	1.44	3.58	4.45	3.99	0.802	1.61	-7.98	-5.87	4.19	4.92	8.8	5.72
cg00933835	2	3705271	ALLC	55821	2	blue	-0.88	22.1	14.4	13	-10.8	4.04	-6.63	0.0926	-5.35	-13	2.98	-7.2	0.553	1.34	-0.887	11.8	2.94	5.42	-0.924	-5.84	-0.989	1.57	-5.31	4.71	4.22	4.9	2.16	0.939	2.01	4.72	0.53	-1.13	1.6	0.152	-0.89	2.64	1.1	10.4	7.21	-0.216	-0.487	-5.44	-4.39
cg00934355	9	1049244	DMRT2;DMRT2;DMRT2	10655	10	purple	1.06	-11.9	-8.48	-5.56	15.3	2.57	8.76	2.73	5.28	17.2	0.682	7.63	6.56	2.45	2.71	-4.4	0.104	-3.09	1.76	11.9	1.86	0.992	7.39	1.19	-0.236	1.29	-1.48	2.97	2.7	1.57	1.04	1.72	0.918	2.12	2.39	-0.422	0.0352	-8.52	-4.23	2.98	2.52	7.52	6.06
cg00934987	17	56605468	SEPT4;SEPT4;SEPT4	5414	4	yellow	-2.61	18.5	10.9	17.2	-5.81	5.81	-3.24	0.517	-7.43	-11.6	5.12	-9.16	4.53	-0.429	-0.366	14.5	1.39	2.59	-1.23	-1.98	-1.97	4.12	-6.6	4.58	4.42	6.74	1.15	0.125	4.37	5.62	2.65	0.551	0.644	-0.0136	-2.05	-0.0129	1.74	11.8	8	0.846	-1.22	-6.63	-1.98
cg00937681	4	77723304		NA	2	blue	-1.54	24	13.4	16.6	-8.56	4.99	-5.06	0.00571	-6.8	-13.4	4.18	-9.03	2.84	0.262	-0.463	13.3	1.96	4.28	-1.09	-4.49	-1.62	3.46	-6.42	4.49	4.72	5.93	1.73	0.268	2.87	5.63	2.21	-0.16	1.42	0.349	-1.34	0.496	1.65	13	9.15	-0.00506	-0.919	-6.55	-2.99
cg00938266	16	66786977	DYNC1LI2	1783	7	black	4.44	-7.73	-11.4	-1.04	18.6	-0.652	14.8	3.92	4.62	9.75	-2.61	1.7	9.38	-2.65	2.58	-4.56	0.261	-3.71	4.89	8.51	4.77	0.219	4.12	1.78	-1.42	-0.166	0.945	1.5	-0.306	-0.032	3.47	2.35	0.221	1.72	1.61	-0.792	1.21	-7	-0.0533	2.43	0.525	4.21	5.77
cg00940502	18	29598296	RNF125	54941	3	brown	-2.63	14	22.4	5.6	-14.3	5.08	-10.2	-0.875	-1.86	-7.45	4.49	0.277	-4.08	8.17	-1.12	13.3	1.78	9.39	-2.36	-2.91	-2.51	3.15	-1.03	4.42	4.47	6.59	0.819	4.29	7.15	5.53	0.244	-1.24	2.87	0.976	0.019	1.37	0.859	10.1	2.39	0.393	1.87	-1.95	-3.27
cg00941241	1	9885960	CLSTN1;CLSTN1	22883	2	blue	-1.43	17.2	16	12.5	-7.47	6.28	-4.41	1.41	-3.94	-7.91	3.96	-3.95	2.35	4.31	-0.0828	16.8	2.89	5.97	-0.676	-0.538	-0.339	3.1	-2.33	6.24	4.9	7.86	1.76	3.66	7.8	6.13	1.2	-0.0565	1.28	0.754	-0.845	0.894	-0.258	9.71	5.23	1.17	0.695	-3.87	-1.47
cg00943585	6	170572016	LOC154449	154449	2	blue	-1.49	27.4	15.8	15.3	-10.9	4.32	-6.36	0.115	-6.43	-14.9	3.82	-8.35	1.12	0.858	-0.568	13.8	2.26	5.37	-0.9	-5.52	-1.58	2.62	-6.5	4.49	4.57	5.45	1.81	0.44	2.63	4.85	1.66	-0.276	0.562	-0.225	-1.86	0.439	1.2	12.6	7.51	-0.14	-1.01	-5.97	-4.21
cg00944304	15	40738072	BAHD1	22893	3	brown	-0.874	15.4	17.2	10.2	-8.13	5.13	-5.61	1.98	-2.25	-5.81	3.8	-1.36	1.13	6.82	1.11	15.1	3.28	7.39	-0.191	-1.02	0.0453	2.16	-0.166	6.58	3.88	7.71	0.832	3.43	7.4	5.04	-0.158	0.172	1.62	-0.288	-0.717	1.33	-0.0238	8.75	3.78	2.42	0.494	-2.97	-2.56
cg00945209	17	76801579	USP36	57602	5	green	3	-10.1	-11.5	-3.42	17.6	-0.258	12.7	2.46	4.58	10.9	-0.55	3.28	6.47	-2.28	2.4	-4.98	0.901	-4.17	3.52	9.12	2.25	-0.071	4.13	1.34	0.845	-1.14	-0.0877	1.5	0.237	-0.0202	2.63	2.49	0.031	2.31	1.48	-0.25	0.932	-6.48	-1.77	2.1	1.59	4.72	5.05
cg00945234	1	50886411	DMRTA2	63950	10	purple	2.63	-17	-10.1	-10.2	15.1	0.0994	8.93	2.94	8.74	22.6	-1.69	10.9	3.46	3.26	2.2	-7.58	0.0262	-1.93	2.94	10.8	3.29	-0.468	10.2	0.667	-1.67	-0.574	-0.713	4.03	1.18	-0.525	0.619	1.43	1.61	2.41	2.85	0.0904	-0.314	-11.7	-5.68	2.8	2.88	8.82	5.88
cg00945443	6	151366391	MTHFD1L	25902	3	brown	-1.61	9.72	17.3	2.66	-12	3.61	-8.47	-0.232	0.0847	-4.74	2.23	2.73	-5.18	9.41	-2.42	10.4	-0.381	9.74	-1.25	-1.72	-0.793	2.99	1.23	3.73	0.34	6.3	1.86	4.27	8.01	3.61	0.313	-1.16	3.33	-0.0527	1.16	0.853	-1.37	8.43	1.6	-2.17	1.54	-1.4	-4.05
cg00946479	22	36903611	FOXRED2;FOXRED2	80020	5	green	0.724	-9.7	-11.2	-1.73	21	2.19	11.7	3.42	2.43	12.1	0.452	3.14	10.2	-1.13	2.57	-3.83	-1.5	-5.97	1.96	11.8	2.37	2.18	4.84	1.64	-1.69	2.48	-1.53	1.27	1.12	1.07	2.13	2.78	1.51	1.83	3.9	1.91	0.152	-6.58	-0.718	2.91	2.88	3.57	5.99
cg00946992	14	29227969		NA	10	purple	2.57	-11.9	-7.57	-6.51	14.9	2.28	9.48	3.74	7.78	19.6	-0.199	9.36	5.69	3.83	2.16	-4.35	1.2	-1	3.23	12.2	3.19	0.201	9.51	2.49	-0.163	1.41	0.196	4.99	2.92	1.54	0.933	1.55	2.06	2.58	2.96	-0.0269	0.233	-9.69	-4.33	2.83	2.6	8.88	5.36
cg00947023	17	11953402	MAP2K4	6416	2	blue	-1.6	21.9	10.8	18.4	-6.17	4.97	-3.34	0.552	-7.34	-13.1	4.36	-10.3	4.36	-1.08	-1.01	13.1	0.579	3.17	-0.513	-3.34	-1.75	4.27	-7.35	4.13	3.97	6.07	2.41	-0.683	2.67	5.17	3.64	1.07	-0.206	-1.09	-2.25	0.529	0.678	13.7	8.4	-0.449	-1.19	-6.1	-2.6
cg00947319	17	47005597	UBE2Z	65264	2	blue	-2.49	26	14.2	16.1	-10.6	4.55	-6.61	0.284	-7.81	-15.9	4.08	-9.53	1.66	0.0732	-1.07	13.4	0.731	3.98	-1.29	-5.53	-1.84	3.41	-6.97	3.77	3.15	5.97	1.51	-0.171	2.23	4.39	1.8	0.347	0.802	-0.474	-1.79	0.214	0.853	13.7	8.32	-0.585	-1.11	-6.82	-3.39
cg00947782	6	30039142	RNF39;RNF39	80352	50	thistle2	-0.552	1.65	3.8	-0.931	-4.26	-1.39	-3.03	-1.27	0.38	-1.65	-0.173	0.736	-3.97	1.83	-1.97	1.37	-0.235	2.47	-0.616	-1.88	-0.929	-0.59	-0.467	-0.807	0.576	-0.479	0.899	-0.0456	1.32	-0.959	-0.778	-0.353	-0.387	-2.67	-0.15	0.605	1.18	1.5	-0.139	0.244	0.0824	1.04	-0.0548
cg00947801	1	41024905		NA	8	pink	0.663	0.321	-0.769	1.5	4.1	0.769	3.34	15.9	0.7	2.27	-0.302	1.29	3.6	1.45	-0.122	1.11	-4.4	-0.0695	9.05	3.39	5.47	3.27	6.68	2.74	-6.56	4.75	0.989	2.3	1.44	-6.27	3.27	17.7	0.41	0.292	1.7	3.14	-6.39	1.65	0.256	-0.4	1.36	-0.962	2.37
cg00948124	8	35452334	UNC5D	137970	2	blue	-2.74	22.8	14.2	14.4	-10.5	4.58	-6.6	-0.298	-7.38	-14.6	4.01	-8.42	1.14	0.651	-0.674	13.1	0.383	4.23	-1.72	-5.15	-2.2	3.44	-6.63	3.15	2.89	5.91	1.01	0.281	2.74	4.51	1.51	-0.28	0.66	-0.906	-1.88	0.264	0.719	13	7.12	-0.431	-1.07	-6.23	-3.13
cg00948250	1	160038302	KCNJ10	3766	2	blue	0.418	23.5	12.6	15.1	-9.12	2.64	-4.56	2.1	-5.31	-13.6	1.61	-8.89	1.67	-0.226	-0.559	11.6	2.23	5.26	1.3	-5.91	0.805	1.04	-5.07	4.98	1.83	4.4	3	0.0397	1.68	2.56	1.08	0.295	-0.141	-1.27	-2.35	1.8	-0.529	10.2	7.17	-0.764	-1.73	-6.89	-4.78
cg00948524	17	29297757	RNF135;RNF135	84282	3	brown	-0.129	11.9	20.5	5.27	-11.2	4.03	-6.64	0.776	0.508	-4.44	2.27	1.76	-3.1	9.17	0.129	13.3	4.81	10.5	-0.749	-1.03	0.236	0.257	1.4	5.79	4.44	5.53	1.2	5.02	9.02	4.37	-1.61	-1.79	2.25	1.07	-0.418	1.67	-0.43	6.21	1.43	0.93	2.67	-1.54	-3.42
cg00949532	8	6456854	MCPH1	79648	2	blue	-1.79	20.9	12.5	15.3	-8.7	3.9	-6.27	0.412	-7	-12.9	3.58	-8.53	2.39	0.486	-0.49	11.7	1.07	3.64	-1.14	-5.22	-1.33	2.78	-5.89	3.98	2.88	5.75	1.15	-0.708	1.97	4.03	1.02	0.00368	1.12	-0.232	-1.37	1.22	0.6	11.4	8.14	-0.394	-0.986	-5.27	-4.1
cg00950004	1	154165673	TPM3	7170	2	blue	-4.16	17.4	11.9	14.8	-5.42	8.33	-5.13	1.19	-7.41	-8.93	6.58	-6.1	4.98	2.71	-0.591	14.3	-0.442	2.81	-2.1	-0.568	-2.34	6.39	-4.27	4.87	3.55	10.4	0.56	1.77	4.93	6.97	2.74	1.49	0.61	-0.406	-1.46	1.14	0.844	12.8	5.96	0.93	-0.708	-3.72	-0.661
cg00950706	16	85262920		NA	5	green	0.274	-8.91	-14.4	-0.25	19.5	0.217	11.6	4.14	-0.292	7.26	-0.3	-1.13	9.8	-6.01	1.73	-5.35	-3.26	-8.91	2.91	7.41	2.04	2.24	1.57	-1.37	-2.77	-0.204	-1.39	-2.46	-2.03	-2.14	3.37	6.23	-1.93	0.0485	0.49	-0.0726	-0.835	-4.34	-0.426	0.989	-0.761	0.944	4.72
cg00950809	1	47082851	MOBKL2C	NA	3	brown	-1.16	11.3	21.4	3.88	-11.9	5.4	-8.38	0.107	0.693	-3.6	3.81	3.31	-3.9	11.2	-0.461	12.4	3.56	10.8	-1.32	-1.01	-1.12	1.93	2.02	6.54	4.4	6.92	1.21	6.4	8.41	6.02	-0.51	-2.01	4.7	2.28	2.29	3.43	0.21	6.64	2.49	1.29	4.24	-0.643	-2.33
cg00950947	10	653567	DIP2C	22982	2	blue	3.05	19.8	10.1	13.3	-7.57	1.49	-1.51	1.77	-2.76	-12.9	-0.191	-8.57	1.28	-1.33	-0.885	10	2.58	6.93	3.07	-5.49	1.83	0.817	-5.24	4.55	2.25	2.64	5.02	0.149	1.6	2.66	3.25	0.193	-0.486	-0.35	-2.44	0.176	-0.304	9.84	6.78	-1.49	-1.76	-6.18	-4.08
cg00952642	8	141537134		NA	2	blue	-4.6	23.7	13.9	15.6	-9.87	6.13	-8.08	-0.204	-9.47	-14.2	6.01	-8.68	2.32	0.903	-0.512	13.5	0.253	2.44	-3.02	-4.48	-3.19	4.46	-6.89	3.79	3.59	7.52	-0.244	0.0244	2.47	5.24	1.17	0.402	0.532	-1.06	-1.87	1.58	0.253	13.8	7.42	0.256	-0.847	-6	-3.29
cg00953201	13	30156486	SLC7A1	6541	7	black	3.29	-8.4	-13	-0.379	22.6	0.0508	16.4	3.95	3.23	9.95	-0.854	0.749	11.1	-4.07	2.46	-4.35	-0.648	-5.62	4.54	9.44	3.17	1.59	3.13	1.28	-1.02	0.0701	0.618	0.104	-0.465	-0.101	4.73	3.74	-0.0567	2.16	1.94	-0.246	0.692	-5.95	0.372	2.52	1.19	2.81	6.98
cg00953256	11	69468875	CCND1	595	2	blue	-4.07	14.3	18.9	8.14	-9.31	7.59	-7.66	-0.0601	-3.3	-6.12	6.56	-0.188	-0.17	8.48	0.319	15.7	0.785	7.26	-2.65	0.381	-2.99	5.51	-1.14	6.18	4.26	10.6	-0.245	5.18	8.43	7.38	1.34	-0.237	3.13	0.571	-0.0362	1.12	0.708	11.6	4.04	1.75	1.54	-2.65	-1.28
cg00953443	8	141577413	EIF2C2;EIF2C2	NA	2	blue	-1.49	24.4	12.1	15.4	-10.6	2.45	-6.34	-0.759	-7.83	-17.4	3.46	-10.9	0.982	-1.55	-0.821	10.7	1.81	3.52	-1.1	-7.67	-2.24	2.05	-8.27	3.28	3.84	3.57	1.74	-1.68	0.279	3.39	1.75	-0.284	-0.0327	-0.955	-2.34	0.72	0.926	13.3	8.47	-0.71	-1.32	-7.3	-4.17
cg00956971	17	1617375	C17orf91;C17orf91;C17orf91;C17orf91;MIR22	NA	10	purple	2.18	-10.7	-5	-6.32	13.5	2.55	8.7	4.12	8.39	20.3	0.156	11.4	5.42	6.16	2.42	-2.01	0.587	0.506	3.27	15.1	3.42	0.786	11.2	3.26	-0.595	2.91	-0.09	5.99	6.4	1.81	0.969	1.61	1.29	1.34	1.93	0.193	-1.41	-8.47	-5.56	3.32	2.63	7.7	6.05
cg00956987	2	32757307	BIRC6;MIR558	NA	5	green	1.19	-10	-9.68	-3.12	17.9	1.6	11.5	4.92	4.02	12.9	-0.822	4.9	8.02	0.232	3.11	-3.41	-1.26	-4.38	3.09	12.1	3.77	1.64	6.88	1.74	-2.76	2.4	-1.41	2.82	2.43	-0.421	1.8	3.71	0.913	2.47	2.38	-0.556	-0.582	-6.98	-2.4	3.09	1.49	4.03	5.58
cg00957641	12	103406953		NA	3	brown	0.706	9.83	17.9	2.13	-10.5	3.37	-6.58	0.923	2.73	-2.38	1.15	4.52	-4.25	11.6	-0.919	9.59	4.02	12.1	0.145	-0.865	1.33	0.184	3.55	6.48	2.61	5.72	2.51	7.9	6.96	4.44	-1.32	-2.47	3.49	1.3	0.0953	1.53	0.181	4.5	0.433	0.673	2.04	0.895	-1.77
cg00959616	12	128866668	TMEM132C	92293	4	yellow	-1.27	17.8	8.81	18.2	-4.43	4.6	-2.34	1.22	-7.08	-11.1	3.43	-10.5	5.61	-1.68	-1.05	11.8	0.588	2.11	-0.0753	-2.65	-0.583	3.69	-6.13	4.62	2.73	5.89	2.51	-0.854	2.57	4.46	3.12	0.86	0.774	-0.551	-1.91	0.901	-0.436	11.1	9.59	-0.888	-1.61	-6.54	-2.54
cg00960790	16	15247312		NA	13	salmon	0.532	5.61	0.584	12.6	7.66	6.33	5.91	4.7	-2.79	0.536	3.6	-5.03	17.6	-0.995	2.92	7.53	2.24	-1.37	2.13	6.93	2.09	3.49	-0.364	7.34	3.4	7.91	0.688	1.06	3.7	5.72	3.23	2.49	0.81	0.972	-0.375	0.793	2.79	2.25	6.36	2.92	-0.137	-1.14	1.92
cg00961139	1	13475005	PRAMEF18;PRAMEF19	NA	22	darkgreen	-8.08	1.51	2.72	2.62	1.33	8.81	-2.79	0.122	-4.22	1.14	9.39	1.48	3.98	4.11	-1.54	4.93	-10.5	-1.34	-3	5.58	-5.94	17.9	-0.0619	0.774	0.167	10.8	-1.54	1.88	4.61	6.05	9.95	6.71	1.7	0.0317	1.13	0.782	0.931	9.99	0.799	-0.414	1.49	1.24	3.26
cg00961450	4	26343960	RBPJ;RBPJ;RBPJ;RBPJ	3516	2	blue	-0.136	19.5	14.4	12.8	-7.94	4.52	-4.29	1.56	-3.36	-9.24	3.46	-4.98	2.09	3.3	0.186	13.8	3.26	6.76	0.583	-2.65	-0.101	2.05	-2.85	7.18	3.59	6.85	2.12	2.56	4.58	5.29	1.18	-0.654	1.23	-0.865	-0.619	0.995	0.139	9.81	6.26	1.1	-0.654	-3.37	-2.86
cg00961640	1	110933767	SLC16A4	9122	10	purple	1.54	-9.58	-3.17	-6.3	10.1	3.29	6.85	2.81	8.07	17.8	0.998	12.4	3.67	7.35	1.58	-1.24	0.581	1.24	2.05	12.9	2.07	1.64	10.1	2.69	0.226	2.95	0.186	5.24	6.61	2.62	1.22	1.43	3.45	2.48	4.16	0.515	-1.16	-6.51	-4.25	3.54	4.1	7.29	5.14
cg00963942	7	116638247	ST7;ST7	7982	22	darkgreen	-10.4	0.55	-0.358	2.68	1.12	7.79	-3.61	-2.48	-7.73	-1.34	10.2	-1.91	3.17	-0.729	-1.84	1.99	-14	-5.24	-5.06	2.4	-9.52	22	-4.44	-3.39	1.13	6.12	-2.83	-2.41	0.575	5.22	13.3	8.39	1.45	1.14	2.1	1.7	0.263	13.1	2.69	0.21	2.58	-1.07	5.11
cg00964221	8	30240029		NA	3	brown	-3.12	12.2	22.4	4.88	-12.9	6.07	-10.4	-0.702	-1.63	-5.3	4.39	1.69	-3.56	9.76	-0.638	13.1	2.23	9.13	-3.03	-1.43	-1.92	2.56	0.311	4.41	4.33	7.45	0.0631	5.04	7.91	5.96	-1.31	-1.67	3.18	1.11	0.441	1.07	0.0473	8	2.13	1.16	2.03	-0.705	-2.39
cg00964751	17	36828900	C17orf96;C17orf96	100170841	5	green	0.285	-6.92	-9.77	0.348	18.7	3.42	10.2	2.99	0.937	10.3	1.33	1.66	12.2	-1.39	2.71	-2.68	-0.44	-6.05	1.3	10.7	2.04	2.15	3.73	2.47	-0.619	3.34	-1.23	2.09	0.506	2.61	1.96	1.73	0.032	1.1	1.31	0.0268	0.195	-6.01	-0.474	2.8	0.742	3.91	6.01
cg00964963	18	25570209	CDH2	1000	2	blue	2.2	20.8	11.1	12.6	-8.41	1.18	-3.42	1.87	-3.07	-12.2	-0.2	-7.54	1.03	0.0512	-1.42	9.59	1.4	6.99	2.49	-6.02	1.79	1.36	-4.24	4.46	1.2	3.58	4.58	0.542	0.767	2.22	2.77	0.366	-0.189	-0.937	-2.67	1.12	0.0466	10.6	6.64	-1.73	-1.64	-4.49	-3.24
cg00965643	1	32674817	DCDC2B	149069	4	yellow	-2.99	15.1	6.98	19.4	-1.61	7.25	-1.61	1.77	-8.32	-8.66	6.03	-9.78	8.77	-1.38	-0.0574	12.2	0.265	-0.0354	-0.957	-0.00978	-1.58	5.53	-5.7	5.05	3.7	8.14	0.784	-0.439	3.15	6.33	3.7	2.23	0.691	-0.533	-1.08	1.37	0.692	10.9	9.48	1.09	-0.761	-8.8	-1.04
cg00966078	1	23079320	EPHB2;EPHB2	2048	8	pink	6.94	1.61	-0.563	2.6	5.65	-0.662	8.47	19.5	5.45	3.47	-3.92	1.59	5.33	1.76	0.0583	1.69	-1.44	3.86	16.2	3.93	10.4	1.18	8.82	7.16	-7.16	3.97	5.89	4.32	2.05	-5.24	5.69	12.5	1.14	1.09	1.74	2.73	-5.7	0.0327	1.58	-0.624	1.56	-0.0715	2.13
cg00966405	7	5535748	MIR589;FBXL18	NA	2	blue	-1.85	24.3	12.7	17.6	-8.39	4.16	-4.62	0.255	-7.69	-14.8	3.51	-10.2	2.86	-0.705	-0.594	13.3	1.24	3.66	-0.948	-4.91	-1.28	3.26	-7.18	4.21	3.26	5.54	1.95	-0.437	2.6	4.45	2.31	0.0913	0.792	-0.673	-1.39	0.955	0.00381	13	9.13	-0.0869	-1.13	-7.78	-3.25
cg00966557	5	149219027	PPARGC1B	133522	5	green	0.0998	-8.22	-11.2	0.702	25.2	3.45	13	3.74	0.907	11.2	1.98	1.51	13.8	-2.26	3.62	-2.3	-0.988	-7.22	1.98	13	1.72	3.03	3.52	2.23	0.0292	3.19	-2.09	0.923	1.37	1.95	3.16	3.8	0.251	1.77	2.38	0.708	0.519	-5.44	-0.0892	4.23	1.75	2.81	6.53
cg00967711	3	100281202	TMEM45A	55076	2	blue	-1.89	21.5	14.4	15.4	-7.48	5.56	-4.51	0.77	-5.85	-10.9	4.66	-6.89	3.06	2.06	-0.881	15.9	1.39	5.18	-0.869	-2.1	-1.48	4.28	-4.83	5.19	4.56	7.47	2.07	1.93	5.72	5.78	2.68	0.589	0.351	-0.581	-2.54	0.586	0.573	13.5	6.53	0.00865	-1.01	-5.23	-2
cg00967854	1	17750646	RCC2;RCC2	55920	5	green	1.02	-8.33	-11.3	-0.0366	24.4	2.49	13.7	4.62	1.87	11.5	0.802	1.98	12.8	-1.98	3.55	-3.09	-1.04	-6.36	3.03	12.2	2.84	2.77	4.54	2.13	-1.03	2.66	-1.2	1.33	0.765	0.948	3.61	4.52	0.635	2.25	1.84	0.469	-0.31	-5.43	0.0205	3.91	1.55	2.92	6.9
cg00968270	16	87471788	ZCCHC14	23174	5	green	1.35	-6.01	-9.98	1.33	17.3	1.17	12.5	3.74	0.633	7.13	-0.3	-0.334	11	-3.68	2.72	-2.21	-1.82	-6.11	3	8.85	2.6	2.76	2.09	0.846	-1.15	1.75	-0.779	-0.246	0.241	0.0361	4.08	4.48	-0.324	1.11	1.42	-0.158	0.556	-3.16	1.04	2.63	0.851	1.55	6.88
cg00968536	1	51442672		NA	2	blue	-1.02	17.9	11.9	15	-6.64	5	-4.26	1.76	-5.23	-9.68	3.92	-7.26	3.68	1.11	0.515	12.7	2.67	4.17	-0.196	-2.88	-0.431	2.25	-3.9	5.04	4.16	6.12	1.11	0.885	3.69	4.88	0.909	0.305	0.611	-0.148	-1.55	0.241	1.19	9.03	6.69	1.15	-0.652	-4.74	-2.2
cg00968638	2	43450965	ZFP36L2	678	3	brown	-1.6	13.8	23.6	4.3	-16	4.15	-10.4	-0.816	-0.686	-7.22	2.81	1.12	-5.58	8.84	-1.25	12	3.01	10.7	-2.03	-3.54	-1.31	0.758	-0.185	4.42	3.48	5.48	1.38	5.05	6.47	4.58	-1.91	-2.85	3.56	1.21	0.282	1.49	0.326	7.68	2.48	-0.309	1.64	-1.32	-3.96
cg00969254	4	184404770		NA	22	darkgreen	-12.9	1.09	1.56	4.18	2.66	13	-3.65	-1.73	-7.9	0.68	12.8	-0.154	6	2.72	-0.854	5.52	-11.9	-4.69	-6.82	6.86	-8.52	22.1	-2.27	-1.16	1.79	12	-4.31	0.922	4.49	8.91	8.73	6.01	2.61	0.813	1.9	1.18	1.31	10.5	2.47	1.81	2.32	0.226	5.49
cg00970979	3	53229491		NA	2	blue	-4.07	21.6	13.1	15.6	-8.67	6.42	-7.4	-0.485	-8.8	-12.6	5.84	-8.43	3.18	1.04	-0.0814	12.8	0.908	2.52	-3.12	-4.12	-3.01	4.2	-6.48	3.89	4.27	7.43	-0.239	0.242	2.28	6.11	1.08	-0.332	1.09	-0.398	-1.68	1.25	1.65	12.3	7.82	0.935	-0.828	-5.8	-2.37
cg00971737	1	111098456		NA	2	blue	0.0259	20	17.8	12.3	-9.12	4.57	-4.92	1.52	-2.52	-8.54	3.13	-3.6	1.2	4.67	0.781	16.2	4.19	7.93	0.376	-2.32	0.163	1.75	-2.05	7.06	4.81	6.8	2.13	2.78	6.36	5.21	0.765	-0.594	2.79	1.25	-0.397	0.986	0.441	9.82	6.83	1.86	0.134	-3.99	-3.08
cg00973115	14	105965156	C14orf80;C14orf80;C14orf80	283643	2	blue	-1.43	19.9	16.7	12.1	-9.74	5.19	-5.63	1.17	-4.18	-10.5	4.18	-4.89	0.691	3.52	-0.0043	15.2	1.85	6.65	-0.232	-2.53	-1.01	3.55	-3.47	5.9	3.82	7.45	1.38	2.84	5.4	5.36	2	0.428	1.39	-0.201	-0.893	1.27	0.539	11.8	5.53	1.24	0.343	-4.79	-2.28
cg00973876	17	77899208		NA	3	brown	-0.766	15.1	24.9	5.26	-14.7	3.89	-9.19	0.0499	0.0146	-6.61	3.24	1.42	-4.67	9.6	-0.337	13.1	3.81	11.5	-0.924	-3.02	-1.05	1.05	0.509	6.28	3.95	6.17	1.4	5	7.03	4.67	-0.929	-2.18	3.91	1.77	0.622	2.27	0.899	8.1	2.86	0.64	2.47	-1.4	-4.61
cg00975680	1	229618011	NUP133	55746	4	yellow	-3.86	12.5	6.16	17.1	-1.26	9.72	-1.88	0.674	-8.35	-7.74	6.85	-9.08	8.77	-1.37	0.54	11.2	-0.801	-0.714	-2.1	0.685	-2.65	6.46	-6.11	3.02	4.16	7.95	-0.0352	-1.56	3.34	7.97	3.7	1.97	0.296	-1.18	-0.906	0.366	1.65	10.3	7.8	1.7	-1.38	-4.77	0.253
cg00976340	14	102963944	TECPR2	9895	2	blue	-2.98	21.3	15.5	15.8	-7.88	6.72	-5.69	0.977	-6.86	-11.1	5.65	-6.72	3.23	2.66	-0.395	17.1	1.77	4.11	-1.7	-1.85	-1.99	4.15	-4.7	6.12	4.48	8.93	0.875	1.53	5.99	6.1	1.33	0.304	2.15	0.282	-0.304	1.24	0.914	12.8	8.09	0.667	0.219	-5.76	-2.35
cg00977293	17	13994507	COX10	1352	2	blue	-3.04	24.7	13.1	15.9	-9.99	4.57	-6.73	-0.887	-8.53	-15.6	4.37	-9.79	1.88	-0.28	-1.35	12.4	0.247	3.55	-2.34	-5.57	-2.7	4.06	-8.02	2.81	3.54	5.68	1.46	-0.822	1.69	4.84	2.22	-0.0871	0.34	-0.926	-2.28	0.0596	1.09	14.6	8.1	-0.75	-1.54	-6.48	-3.62
cg00977978	7	139409421	HIPK2;HIPK2	28996	3	brown	-1.75	20.1	16.7	11.1	-11	5.39	-7.4	-0.129	-3.91	-10.3	3.98	-4.12	0.0421	4	-1.2	12.9	1.58	7.47	-1.25	-4.11	-1.56	3.37	-3.67	4.26	4.1	6.2	2.2	1.77	3.71	6.04	1.6	-0.54	2	0.629	-0.899	1.28	0.926	11.8	5.5	0.0225	0.337	-3.8	-3.67
cg00978505	1	65728475		NA	2	blue	-3.35	24.9	13.5	16.1	-10.7	4.48	-7.31	-0.343	-9.24	-17	4.36	-10.3	1.54	-0.594	-0.505	12.9	0.537	2.73	-2.22	-5.86	-2.44	3.3	-7.93	3.26	3.18	5.78	0.306	-0.674	1.89	4.24	1.03	0.000768	-0.0494	-1.42	-1.95	0.773	0.355	13.3	7.33	-0.165	-1.61	-7.36	-4.24
cg00978901	1	22956280		NA	3	brown	-2.48	10.6	17.6	4.19	-9.8	5	-8.07	1.11	-0.976	-4.2	3.37	2.53	-2.77	10.3	-0.926	12.1	2.06	9.03	-1.7	-0.008	-0.299	2.16	1.67	6.01	1.86	8.42	0.832	5.64	9.19	4.39	-1.91	-1.08	3.37	0.0723	1.38	1.46	-0.435	6.88	1.27	0.214	2.2	-0.398	-2.73
cg00979527	1	4749733	AJAP1;AJAP1	55966	5	green	1.23	-6.32	-11.9	2.2	22	2.08	13.6	3.94	0.656	8.37	0.612	-0.878	13.7	-4.58	3.04	-2.78	-1.37	-6.95	3.21	9.66	2.32	2.89	1.95	1.27	-0.258	1.51	-1	-0.689	-0.393	0.978	4.61	4.52	-1.39	0.414	0.258	0.651	1.01	-3.96	0.492	2.95	-0.335	1.18	5.28
cg00979803	17	38646740	TNS4	84951	2	blue	0.617	21.7	13.5	13.8	-9.16	3.07	-4.8	1.35	-4.15	-12.1	1.84	-6.93	1.51	1.24	0.186	12.1	4.47	6.13	0.433	-5.03	0.866	-0.16	-4.28	5.56	3.3	4.59	2.38	0.732	2.41	3.6	-0.667	-1.31	0.654	0.186	-1.79	1.06	0.497	8.56	6.64	0.277	-1.22	-4.74	-5
cg00980058	1	233248709	PCNXL2	80003	5	green	0.64	-9.63	-4.43	-5.35	13.1	4.62	8.38	4.18	6.92	17.9	1.91	11.5	5.76	6.5	2.18	-0.372	0.959	-0.198	2.14	17	2.33	2.23	10.3	3.73	1.26	4.48	-0.777	7.87	7.62	3.3	1.27	2.57	2.95	3.33	4.4	-0.357	0.513	-6.98	-4.17	3.41	4.51	8.59	6.96
cg00980319	1	2560884	MMEL1	79258	3	brown	-1.01	11.7	17.3	6.45	-7.94	5.52	-4.92	1.71	-0.107	-3.53	4.25	1.23	-0.598	8.7	0.7	14.2	2.42	8.78	-0.0218	0.691	-0.715	2.97	1.31	6.76	3.98	7.93	1.09	5.72	9	5.39	1.11	0.0281	4.45	1.81	1.17	0.896	1.22	7.93	3.98	1.57	3.47	-0.893	-1.38
cg00980581	6	36238095	PNPLA1;PNPLA1;PNPLA1	285848	3	brown	-1.79	13.1	19.9	6.32	-10.6	5.6	-7.78	0.162	-0.994	-5.39	3.69	0.905	-1.99	8.78	-1.31	14.1	3.05	9.47	-1.71	-0.885	-0.935	2.2	0.404	5.77	3.99	7.58	1.48	4.73	8.51	5.92	-0.913	-1.84	3.01	0.602	0.0837	1.45	0.404	8.07	2.76	-0.122	1.03	-0.826	-2.71
cg00980772	2	121224679	LOC84931	NA	2	blue	1.73	19.4	10.4	14.3	-6.38	2.56	-2.64	2.28	-3.72	-10.3	0.807	-7.98	3.24	-0.266	0.0284	10.4	3.38	5.35	1.88	-4.3	1.87	0.265	-3.96	5.03	3.23	3.61	3.35	0.377	1.83	3.05	1.2	0.15	-1.25	-1.58	-2.8	0.372	-0.355	8.36	6.24	-0.212	-1.68	-4.9	-3.45
cg00980784	17	47287577	ABI3;GNGT2;ABI3	NA	10	purple	3.16	-8.59	-2.26	-6.56	9.98	2.86	7.32	4.39	9.98	19.6	0.789	14.1	3.6	8.93	2.5	-0.899	2.8	2.81	3.79	13.1	3.24	0.437	12.4	5.75	0.638	3.5	0.699	8.84	6.8	2.51	1	0.981	4.27	4.26	4.1	0.719	-0.315	-7.96	-4.31	4.18	4.62	9.24	4.86
cg00981003	10	131451000	MGMT	4255	2	blue	2.11	18	11.3	12	-5.91	2.51	-1.83	5.84	-1.87	-8.25	0.402	-4.8	2.54	2.5	-0.575	11.3	2.5	7.04	4.4	-2.6	3.58	1.29	-0.704	7.94	0.422	6.44	4.07	3.34	3.18	1.62	1.88	2.8	1.17	-0.301	-0.893	1.71	-0.614	8.36	6.11	-1.04	-0.395	-4.25	-4.14
cg00981070	1	2046702	PRKCZ;PRKCZ;PRKCZ	5590	5	green	1.85	-9.66	-14.2	-1.52	20	-0.668	13.4	3.02	1.84	8.96	-0.625	0.383	8.9	-5.1	2.53	-5.68	-1.02	-7.35	3.26	7.82	1.89	1.07	2.28	-0.259	-0.664	-1.41	-0.739	-1.48	-1.54	-1.56	3.67	4.31	-1.09	1.01	1.04	0.563	-0.535	-5.4	-0.502	2.13	0.382	1.9	5.25
cg00981357	16	88635380	ZC3H18	124245	2	blue	-0.955	22.2	13.1	13.7	-8.95	3.76	-5.13	2.12	-5.58	-13	2.85	-7.34	1.38	1.06	0.0272	12.6	0.219	5.38	0.923	-4.27	-0.144	3.7	-4.66	4.75	1.9	6.52	1.59	1.2	3.02	3.26	2.69	2.08	0.771	-0.534	-0.8	1.27	-1.37	13.4	6.92	0.11	-0.391	-5.54	-2.78
cg00981994	2	219735876	WNT6	7475	2	blue	-0.522	21.5	11.5	18	-6.63	3.81	-3.46	1.6	-6.53	-12.5	3.12	-10	4.05	-0.741	-0.439	13.3	3.04	3.32	0.0688	-3.86	-0.242	1.86	-5.72	5.71	4.03	5.47	2.24	0.394	3.44	4.01	1.38	0.219	0.244	-0.507	-2.12	0.362	0.0596	10.1	8.38	-0.075	-1.51	-6.9	-3.13
cg00983899	11	67290853	CABP2;CABP2;CABP2;CABP2	51475	2	blue	-0.00238	21	14.8	14.9	-6.04	5.24	-2.59	2.82	-3.39	-8.63	4.25	-5.09	3.63	3.58	-0.216	16.9	3.04	6.73	1.58	-0.716	0.0422	3.72	-2.53	9.04	4.4	8.79	3.41	3.83	6.93	5.45	3.28	1.35	3.15	1.1	-0.209	1.28	0.722	12.1	8.77	0.781	1.02	-6.3	-1.99
cg00984967	1	182354972	GLUL;GLUL;GLUL	2752	1	turquoise	17.5	0.428	-1.18	-0.563	2.99	-7.57	10	8.81	10.7	2.89	-14.4	1.72	0.754	0.172	1.66	-1.67	9.16	6.67	12.8	-0.416	18.7	-12.8	7.87	6.32	-4.56	-3.91	6.63	3.59	-0.444	-6.04	-4.43	-1.48	-0.269	0.898	0.201	0.128	-2.68	-9.5	-0.376	-0.836	-0.462	0.49	-3.01
cg00985388	3	183952212	VWA5B2	90113	4	yellow	0.292	14.3	6.01	18.1	-1.1	4.28	1.39	1.97	-5.37	-8.74	3.18	-10.3	7.7	-2.95	-0.137	11.4	1.22	1.59	1.6	-0.489	0.069	3.78	-5.57	4.73	3.92	5.11	2.96	-0.891	3.42	4.76	4.78	1.9	-0.421	-1.02	-1.84	0.905	0.835	9.54	8.8	0.667	-1.42	-7.11	-0.299
cg00985960	18	32817327		NA	2	blue	5.87	17.3	10.2	10.4	-8.33	-1.3	-1.32	1.57	-0.0212	-10.7	-2.56	-6.45	-0.297	-0.361	-0.623	8.17	5.19	8.68	4.16	-6.57	3.53	-2.48	-3.33	5.54	2.11	0.619	6.05	0.545	0.837	1.2	1.27	-1.82	0.616	0.51	-1.46	0.783	-0.299	6.4	6.99	-1.47	-1.03	-5.33	-4.59
cg00985983	22	30728510	SF3A1;SF3A1	10291	2	blue	-2.36	19.7	11.9	16.6	-5.82	6.67	-4.21	0.61	-6.41	-9.85	5.52	-7.68	5.11	1.21	0.115	13.3	0.915	3.61	-1.27	-2.2	-1.97	4.84	-5.33	4.27	4.3	7.83	1.2	-0.0689	3.12	6.71	2.8	0.896	1.25	0.0564	-1.72	0.696	1.99	12.3	8.18	1.14	-0.879	-5.07	-1.98
cg00987461	12	104444006	GLT8D2	83468	3	brown	0.0882	12.9	21.3	4.25	-13.4	3.43	-7.65	0.106	1.11	-5.74	2.2	1.72	-4.96	8.78	-1.22	11.7	3.37	12.1	-0.101	-2.72	-0.308	1.08	0.755	4.68	4.32	4.73	2.51	4.96	7.09	4.47	-0.117	-1.16	3.53	2.19	0.288	1.44	0.265	7.8	2.42	-0.0899	2.53	-0.479	-2.94
cg00988037	1	54869007	SSBP3;SSBP3;SSBP3	23648	5	green	0.772	-9.61	-7.45	-2.95	19.7	3.9	11.7	3.92	5	16.2	1.27	7.22	9.27	3.01	2.61	-1.03	0.714	-2.68	2.21	17.1	2.75	2.15	7.84	4.35	0.253	4.29	-0.583	5.27	5.54	2.97	1.86	2.07	1.76	2.72	2.96	0.161	0.973	-6.94	-3	3.15	2.99	6.41	5.57
cg00988256	19	11406173	TSPAN16	26526	2	blue	-1.76	18.2	9.61	16.1	-5.02	4.71	-3.37	1.59	-6.95	-10.3	3.46	-8.66	5.07	-0.23	0.338	11.5	-0.0255	2.24	-0.371	-2.62	-0.436	4.43	-5.15	4.58	2.38	6.84	1.17	0.144	2.31	4.35	3.18	1.58	0.47	-1.07	-1.08	0.622	-0.673	11.4	8.28	0.0404	-0.435	-6.34	-2.51
cg00989258	12	123527156	PITPNM2	57605	5	green	3.56	-13	-8.67	-7.32	15.6	-0.125	11.8	5.88	8.91	18.1	-2.24	9.92	4.12	2.97	1.72	-4.6	-0.66	-1.03	5.64	12.5	5.02	0.114	11	2.29	-2.93	0.683	0.78	4.32	3.42	-1.68	2.12	4.23	1.8	2.17	3.78	0.637	-2.03	-8.91	-4.48	1.76	3.53	6.68	6.14
cg00989315	7	21982818	CDCA7L;CDCA7L;CDCA7L	55536	2	blue	-0.122	22.8	11.7	16.3	-8.52	2.98	-4.44	0.24	-6.1	-14.3	2.61	-10.1	2.25	-1.18	-0.598	11.3	2.03	4.48	0.0153	-6.01	-0.733	2.16	-6.73	3.83	3.67	4.03	2.6	-0.801	1.21	3.89	2.22	-0.144	0.135	-0.494	-2.55	0.977	0.419	12	8.03	-0.447	-1.5	-6.78	-3.29
cg00990587	22	20227688		NA	5	green	1.66	-8.62	-10.1	-0.948	22.9	2.29	13	5.3	3.31	13.9	0.0603	3.63	12	-0.348	3.1	-2.8	-0.168	-4.91	3.69	12.8	3.66	2.05	6.23	3.63	-1.23	3.07	-0.413	2.66	1.85	0.924	3.04	3.7	1.14	1.92	2.29	0.929	0.0562	-6.85	-0.671	4.06	1.25	4.15	6.26
cg00991994	3	99639553	C3orf26;FILIP1L;MIR548G;FILIP1L	NA	3	brown	2.17	18	13.4	10.5	-9.6	1.57	-4.05	0.982	-1.68	-10.2	0.5	-5.02	-0.257	2.07	-1.74	10.8	3.77	8.32	1.62	-5.18	1.05	-0.0402	-3.03	5.36	3.01	3.24	4.97	1.09	2.97	2.99	1.25	-1.36	1.53	0.802	-0.727	0.854	0.596	8.35	6.36	-1.06	-0.0721	-4.16	-3.71
cg00994250	6	151087821	PLEKHG1	57480	3	brown	1.84	13.4	19.1	5.37	-10.4	3.08	-5.15	2.09	2	-4.62	0.843	1.84	-2.75	8.94	0.555	12.2	3.98	12.7	1.69	-1.73	1.95	0.563	2.19	6.88	2.77	5.78	2.7	5.33	7.24	3.88	0.103	-1.05	3.65	1.64	0.602	2.37	-0.516	6.79	2.88	0.485	3	-1.49	-3.61
cg00995085	3	184375369		NA	8	pink	-0.369	1.43	1.1	3.8	5.5	4.72	3.43	18	0.0164	3.8	1.4	1.66	7.43	3.58	1.83	4.32	-2.29	0.00717	7.51	6.65	6.04	3.5	8.05	5.4	-4.44	8.88	-0.529	4.86	4.59	-2.61	1.35	14.1	1.13	1.1	1.62	2.83	-4.83	-0.0605	-0.042	2.74	1.22	-0.101	2.85
cg00995141	2	18228497		NA	2	blue	-2.5	24	14	14.5	-11.2	4.27	-7.5	-0.82	-7.41	-15.2	4.21	-8.79	0.924	0.331	-0.27	12.2	1.65	4.32	-2.05	-6.22	-2.48	2.76	-7.17	3.54	4.04	5.13	0.879	-0.317	1.61	4.8	1.12	-0.893	0.492	-0.678	-2.27	0.479	1.36	12.5	7.28	0.304	-1.23	-6.12	-3.91
cg00995324	7	139446195	HIPK2;HIPK2	28996	2	blue	-3.5	25.1	13.7	16.5	-10.5	5.32	-7.55	-1.25	-9.07	-16.2	4.97	-10.1	1.95	-0.296	-0.53	13.2	1.29	2.88	-3.13	-5.62	-3.07	3.4	-8.26	3.07	4.71	5.75	0.244	-1.11	2.11	5.57	0.935	-0.791	0.208	-0.731	-2.02	0.407	1.37	13.5	7.65	0.0795	-1.39	-6.81	-3.83
cg00995893	13	45676585		NA	2	blue	-2.11	21.9	11.9	16.2	-7.93	4.47	-5.3	0.606	-7.44	-13.1	4.13	-9.3	3.07	-0.0643	-1.04	11.9	1.13	3.67	-0.942	-4.76	-1.61	3.63	-6.46	4.48	3.31	6.16	1.68	-0.201	2.08	4.54	2.16	0.392	1.41	0.0229	-1.03	0.804	1.19	12.2	9.08	-0.117	-0.786	-6.27	-2.92
cg00996847	1	59902528	FGGY;FGGY	55277	3	brown	-1.69	12.6	18.5	7.11	-7.9	6.86	-5.58	2.04	-0.491	-3.45	4.49	1.64	0.13	9.78	-0.529	15.1	0.953	9.51	-0.147	0.871	-0.493	5.02	1.54	6.44	2.93	9.79	1.99	5.13	9.75	6.18	2.19	0.904	4.43	1.02	1.14	1.75	-1.05	9.86	3.97	1.4	1.77	-0.953	-2.13
cg00997054	3	32904291	TRIM71	131405	3	brown	-2.25	19.9	18.9	9.85	-12.5	4.56	-8.48	-0.153	-3.77	-10.6	4.33	-3.63	-1.46	4.69	-1.51	14	1.71	7.9	-1.34	-4.02	-2.2	3.22	-3.59	4.96	4.22	6.45	2.21	2.45	4.79	4.98	1.38	-0.339	1.95	0.442	-1.3	0.0844	0.581	12.4	5.36	-0.509	0.441	-3.45	-3.38
cg00997262	16	19421265	TMC5;TMC5	79838	22	darkgreen	-8.99	6.38	5.3	8.06	-0.0755	12.5	-4.06	1.93	-7.59	-2.29	9.88	-1.82	6.49	3.62	-0.703	9.05	-9.27	-1.6	-3.3	4.81	-4.51	18	-1.3	2.21	0.154	14.8	-2.2	2.47	5.5	7.51	8.83	7.03	2.01	0.109	0.716	2.07	-0.904	12.3	3.22	1.11	1.22	-1.44	3.34
cg00997998	14	65150074		NA	2	blue	-2.02	25.1	15.1	13.9	-11.3	4.3	-6.79	-0.137	-6.54	-14.6	4.14	-7.87	0.467	1.07	-0.792	13.4	2.23	5.31	-1.22	-5.51	-1.86	2.77	-6.24	5.13	3.95	5.73	1.54	1.24	2.44	4.82	1.53	-0.645	1.67	0.653	-1.18	0.738	0.91	12.7	7.84	-0.412	-0.285	-5.83	-4.38
cg00998132	8	145844626		NA	5	green	4.37	-3.11	-9.06	4.22	19.1	0.929	15.8	5.71	2	6.41	-0.458	-2.15	14.5	-4.56	3.82	-0.775	2.21	-4.21	5.89	8.35	4.35	0.431	2.3	4.89	0.696	1.46	0.822	0.88	-0.00354	0.663	4.1	3.44	-1.09	1.48	-0.153	-0.268	1.19	-4.1	1.72	3.28	0.185	0.901	4.25
cg00998372	2	105483497		NA	3	brown	0.354	12.6	17.3	6.24	-8.86	4.89	-5.42	1.32	0.352	-3.93	2.73	1.6	-0.85	9.09	-0.605	12.3	2.73	9.79	0.263	-1.21	0.209	1.85	1.15	5.55	3.18	6.37	2.44	4.45	7.01	5.11	0.666	-0.833	2.97	1.23	-0.222	1.43	1.1	7.01	2.83	0.834	1.73	-0.131	-2.21
cg00998744	3	147142198		NA	42	lightcyan1	-0.0578	-3.05	0.43	-2.57	3.16	2.7	1.37	0.717	3.38	6.03	1.85	5.27	1.48	4.77	0.248	0.457	1.67	1.94	0.02	5.42	0.0802	0.785	3.96	2.19	2.39	2.8	-0.0252	4.02	3.57	2.81	-0.534	-0.236	2.64	3.55	2.16	0.143	2.32	-2.82	-1.6	1.49	2.96	18.9	4.18
cg00999152	2	72369887	CYP26B1	56603	5	green	3.61	-7.23	-8.89	-0.485	18.9	1.27	13.9	6.29	4.83	11.3	-1.88	2.96	10.5	-0.482	3.45	-2.44	0.177	-2.91	5.37	11.4	5.89	1.07	6.48	3.43	-1.68	2.33	0.0345	3.03	2.01	0.401	2.97	4.05	0.848	2.12	2.72	0.0289	-0.106	-6.85	-0.296	3.38	1.98	4.58	6.17
cg00999595	20	40320537		NA	7	black	3.26	-5.95	-9.73	1.04	19.4	0.7	15	6.3	3.14	9.06	-1.57	0.921	11.7	-2.59	2.46	-2.11	-1.36	-3.97	5.64	9.89	4.96	2	4.49	2.62	-2.9	2.24	0.773	1.08	1.1	-0.586	4.52	4.8	-0.362	0.581	1.42	0.429	-0.423	-5.14	0.13	2.02	0.688	2.32	6.11
cg01000236	16	1262174	CACNA1H;CACNA1H	8912	5	green	1.75	-7.18	-12.8	-0.108	17.6	0.867	11.8	1.81	1.51	7.5	0.514	-0.447	9.79	-5.07	1.96	-5.11	-1.12	-6.48	2.81	6.69	0.979	2.57	1.09	1.11	0.0738	-0.559	0.237	-0.897	-2.66	1.12	5.79	3.22	0.139	2.06	1.8	0.386	0.93	-3.58	1.28	1.68	1.72	2.5	5.28
cg01002030	1	65211677	RAVER2	55225	10	purple	0.603	-14.2	-8.51	-7.72	14.7	2.58	7.53	2.89	6.24	20.4	0.489	9.81	5.15	3.75	2.44	-5.38	-0.268	-2.94	1.36	12	2.18	0.888	9.31	1.15	-1.27	1.32	-1.74	3.97	2.45	0.972	0.385	1.76	1.98	2.25	2.89	0.328	-0.362	-9.55	-4.59	3.28	2.92	7.88	6.13
cg01003448	16	745685	FBXL16	146330	10	purple	4.94	-17.2	-9.98	-12	12.6	-3.28	10	2.48	11.1	19.1	-3.37	11.3	0.546	2.53	2.38	-7.88	2.8	-0.632	4.24	8.87	3.85	-3.07	9.98	1.78	-0.717	-3.25	0.0479	4.18	1.61	-2.34	0.162	0.602	1.23	3.58	2.82	-0.0326	0.482	-12.6	-6.17	1.94	3.8	7.92	4.37
cg01004363	10	88729464	AGAP11;C10orf116	119385	10	purple	1.89	-11.5	-3.7	-11	7.97	1.24	4.38	2.7	9.64	19.4	-0.853	15.4	0.344	8.27	2.26	-4.61	1.26	1.75	1.83	10.3	3.23	-0.853	13	2.22	-1.33	1.53	-1.26	7.03	3.59	0.654	-1.68	-0.0366	3.54	2.87	4.16	1.22	-0.653	-9.83	-6.79	2.77	3.92	8.34	3.85
cg01005439	16	67204010		NA	3	brown	0.945	13.7	23.2	4.38	-14.5	2.06	-7.75	1.1	1.26	-6.27	0.643	1.53	-5.35	8.9	-0.991	12	4.85	12.5	0.398	-3.41	1.26	-0.915	1.49	6.19	2.67	4.66	2.54	5.53	6.95	2.85	-2.1	-2.37	3.36	1.41	0.217	1.47	0.0969	6.07	2.36	-0.35	1.74	-1.88	-4.17
cg01005937	16	84701635		NA	10	purple	4.89	-6.06	-0.14	-6.73	6.73	1.51	6.76	9.78	12.5	15.9	-1.33	15.4	1.64	10.9	1.89	-0.612	-0.324	6.05	8.87	10.5	6.29	2.03	17.8	6.69	-2.67	4.62	2.41	10.3	6.04	-0.49	4.21	6.38	5.13	3.99	5.68	2.05	-2.14	-4.87	-3.55	2.37	5.82	7.37	4.67
cg01007305	10	88123687	GRID1	2894	5	green	4.48	-10.1	-6.7	-5.81	14.2	0.23	11.1	4.95	8.88	17.5	-1.46	8.92	5.17	3.54	3.58	-3.36	2.39	-0.207	5.01	11.6	4.78	-0.583	10.5	4.92	-0.801	1.34	0.205	6.09	3.75	0.243	1.74	1.71	2.77	4.26	3.4	0.536	-0.0237	-9.72	-2.63	3.25	4.06	7.04	5.34
cg01007458	19	15084527	SLC1A6	6511	2	blue	-3.08	18.3	18.7	12.1	-9.53	6.31	-7.28	0.52	-4.83	-8.78	5.28	-3.48	1.11	5.44	-0.468	16.5	1.71	6.23	-2.05	-1.8	-1.89	4.04	-2.74	5.2	4.29	8.63	0.748	2.31	6.94	5.94	0.77	0.204	2.07	0.352	-0.88	0.514	0.536	12.1	5.22	0.657	0.472	-3.85	-2.64
cg01008117	12	4399358	CCND2	894	5	green	5.07	-5.02	-10.9	2.35	18.9	0.065	16.6	6.07	2.9	7.12	-3.38	-1.26	12.4	-4.81	2.99	-2.88	0.863	-4.29	6.16	7.88	6.55	-0.297	3.33	2.48	-2.23	0.121	1.63	-0.0343	-0.725	-0.715	3.18	3.54	-0.357	1.42	1.01	-0.943	-0.641	-5.81	1.63	2.44	-0.155	1.62	4.9
cg01008154	1	46509395	PIK3R3;PIK3R3	8503	2	blue	-3.03	21	15.9	13	-10.9	5.62	-6.71	-0.653	-6.5	-12.8	4.82	-6.74	0.658	1.94	-1.53	14.6	1.2	4.9	-2.27	-3.87	-2.69	3.86	-6.09	3.95	4.51	6.27	1.46	1.63	4.14	5.71	1.87	-0.334	1.22	-0.444	-1.46	0.307	1.65	13.3	6.9	-0.428	-0.341	-5.32	-3.16
cg01008557	7	31292573		NA	2	blue	-2.02	24.8	12.9	15.9	-10	4.03	-6.43	-0.0595	-7.77	-16.1	3.52	-10.1	1.7	-0.56	-0.864	12	0.514	3.8	-1.23	-6.15	-1.69	3.11	-7.36	3.3	2.67	5.25	1.58	-0.799	1.42	4.1	1.79	-0.13	0.625	-0.73	-1.76	0.927	0.283	13.1	8.24	-0.427	-1.21	-6.71	-3.55
cg01011530	13	112838611		NA	3	brown	-4.05	17.7	18.4	9.21	-13.1	5.57	-10.2	-0.961	-5.41	-10.7	5.24	-3.63	-1.44	4.98	-1.62	13.6	0.649	6	-3.29	-3.72	-3.04	3.8	-3.64	4.12	3.32	7.78	0.383	2.58	4.34	5.51	-0.00139	-1.08	2.49	0.497	-1.14	1.38	1.27	12	5.42	-1.02	0.392	-3.67	-4.24
cg01011769	16	85648749	KIAA0182;KIAA0182	NA	5	green	3.47	-12.2	-8.7	-6.08	18.3	0.432	12.9	4.64	8.11	19.4	-0.839	8.84	6.14	2.79	2.82	-3.81	1.38	-1.62	4.49	13.9	3.92	0.076	9.88	3.9	-0.699	1.38	-0.136	5.11	4.18	0.0956	1.83	2.39	2.3	3.27	3.9	0.853	-0.449	-9.39	-3.05	2.88	3.76	5.7	6.26
cg01012572	5	16785051	MYO10	4651	5	green	2.74	-7.22	-11.9	0.388	19.7	0.436	14.7	4.42	2.4	8.51	-1.62	0.0382	11	-4.35	2.69	-3.72	-0.969	-5.48	4.26	8.8	3.92	1.65	3.01	1	-1.54	0.273	0.332	0.171	-0.572	-0.452	4.26	4.17	-0.564	2.01	1.2	-0.927	-0.662	-5.17	0.298	2.18	0.258	1.92	6.18
cg01013324	17	7608068	EFNB3	1949	10	purple	0.862	-9.89	-5.93	-4.74	13.9	4.04	8.14	2.4	5.97	18	1.83	8.81	6.83	4.33	2.26	-2.41	0.852	-1.36	1.58	12.9	1.26	2.33	7.91	3.01	1.92	2.65	-0.252	4.67	3.94	3.7	2.62	1.78	1.98	2.72	2.68	0.466	1.92	-6.6	-3.23	4.15	3.5	8.66	7
cg01014029	7	5646477		NA	5	green	1.7	-10.3	-15.1	-1.83	18.8	-1.19	11.7	3.4	1.3	8.75	-1.85	0.023	8.58	-5.49	2.6	-6.94	-1.53	-8.02	2.99	6.82	2.94	0.356	2.25	-1.62	-1.56	-1.83	-1.39	-2.06	-2.45	-2.51	2.07	4.48	-1.68	0.915	0.673	-0.691	-0.406	-7.03	-1.48	2.01	-0.142	2.88	5.27
cg01014190	2	51254021	NRXN1;NRXN1	9378	5	green	-0.725	-0.235	-5.61	7.82	13.6	5.04	8.44	3.52	-2.64	3.61	3.72	-4.63	17.2	-4.06	2.93	1.97	-0.92	-5.81	1.56	7.61	0.755	4.73	-0.255	3.16	2	4.69	-0.708	-0.815	0.222	3.98	5.3	4.33	-0.387	0.553	-0.386	-0.144	2.04	0.219	4.34	3	0.00466	-0.337	4.33
cg01014399	5	3322697		NA	24	darkgrey	8.16	4.92	6.83	2.89	0.751	0.535	4.8	10.6	7.95	3.78	-2.48	4.81	2.28	8.26	2.5	7.35	9.1	10	9.7	4.54	9.27	-3.93	10.2	18.2	0.223	5.55	4.63	11.6	8.28	0.351	-0.89	0.673	4.26	3.29	2.54	2.16	-1.07	-2.93	1.13	2.12	3.47	1.5	-0.618
cg01015175	11	112045641	BCO2;BCO2	83875	4	yellow	-3.91	18.7	13.4	15.6	-7.18	7.42	-5.12	0.483	-7.28	-11.1	5.48	-6.79	3.58	1.77	0.00877	15.8	0.0915	3.33	-2.2	-1.33	-2.06	5.54	-5.37	4.03	3.77	8.53	0.349	0.851	5.51	6.57	2.37	0.965	1.26	-0.249	-0.857	0.764	0.632	13.2	7.3	1.36	-0.728	-5.3	-1.74
cg01017147	1	171810105	DNM3;DNM3	26052	5	green	0.897	-7.51	-8.65	-0.491	17.2	3.43	10.2	4.19	2.28	11.8	1.19	2.81	10.8	-0.515	4.49	-2.56	0.0562	-4.96	2.44	11	2.5	1.91	4.99	2	0.601	2.38	-1.88	2.01	1.43	1.93	2.15	3.64	0.177	1.49	1.05	1.24	-0.841	-5.96	-1.3	5.08	1.52	3.25	5.97
cg01017395	1	12609957		NA	5	green	2.9	-11.1	-7.84	-5.34	18	1.55	12.4	5.62	8.01	18	-0.364	9.09	6.55	3.24	3.13	-2.5	1.24	-1.29	4.65	15.2	4.17	0.503	9.93	3.9	-0.553	2.37	-0.201	5.15	5.19	0.307	1.77	3.52	2.1	2.95	3.71	0.983	-0.355	-8.5	-3.5	3.88	3.65	6.82	6.01
cg01017608	13	91627026		NA	3	brown	0.287	11.8	21.6	3.76	-12.2	3.48	-7.19	0.463	1.71	-4.22	1.95	3.02	-4.53	10.5	-0.874	12.3	4.25	12.6	-0.195	-1.47	0.172	0.306	1.84	6.14	3.64	5.67	2.45	5.76	8.67	4.48	-1.46	-2.31	4.36	1.78	1.58	1.62	0.0357	6.51	2.59	-0.538	3.08	-0.139	-3.72
cg01019484	6	44499229		NA	2	blue	0.0802	20.9	10.6	15.5	-7.86	2.51	-4.11	-0.175	-5.76	-13.1	2.23	-9.94	2.55	-1.31	1.76	10.4	3.19	4.02	-0.292	-5.83	-0.595	0.836	-6.68	4.55	3.73	3.53	1.06	-1.21	0.94	3.85	1.23	-1.68	-1.23	-1.22	-4.28	-0.273	0.354	9.7	7.01	1.35	-2.53	-6.95	-5.35
cg01019654	16	75301973	BCAR1;BCAR1	9564	4	yellow	-0.661	16.7	7.98	19.2	-2.53	5.33	-0.379	1.57	-6.1	-9.76	4.18	-9.94	7.06	-1.73	0.32	12.7	2.69	2.39	0.448	-1.01	-0.497	3.51	-5.91	5.73	5.19	5.98	2.28	-0.468	3.68	5.67	3.55	1.18	0.0545	0.423	-2.51	0.533	0.941	10.5	8.5	1.05	-1.26	-4.69	-1.09
cg01020263	16	50732073	NOD2	64127	3	brown	-0.992	14.5	22.7	5.17	-15.1	4.05	-10	-0.119	-0.861	-7.05	2.72	0.605	-4.53	8.41	-1.62	12.2	3.11	10.6	-1.38	-3.82	-0.79	0.941	-0.0223	4.98	3.29	5.7	1.98	4.56	5.92	4.49	-1.39	-2.29	2.8	0.397	0.109	1.8	0.447	7.89	2.19	-0.359	1.25	-1.93	-4.37
cg01020421	8	143557441	BAI1	575	10	purple	2.88	-12.2	-5.69	-8.12	13.6	2.09	8.83	3.64	9.91	23.9	-0.0673	13.1	4.34	6.69	2.6	-3.53	1.44	0.754	3.42	13.9	3.25	0.724	12.2	4.21	-0.11	2.33	-0.00712	7.36	4.48	1.97	1.72	1.25	4.15	3.76	4.29	-0.243	0.517	-9.16	-3.9	3.64	4.43	8.95	6.56
cg01020427	2	86402957	IMMT;IMMT;IMMT	10989	2	blue	0.641	18.2	10.9	12.7	-7.42	2.93	-3.47	0.552	-3.8	-10.5	2.01	-7.16	2.19	0.504	-1.13	10.2	1.1	5.87	0.792	-4.49	-0.242	2.67	-4.99	3.93	2.48	4.2	3.66	-0.157	1.74	3.76	3.39	0.155	0.496	-0.847	-1.2	1.53	-0.0635	11.1	7.21	-0.108	-0.0787	-4.32	-1.38
cg01020484	14	74185294	C14orf43;C14orf43	NA	5	green	1.93	-5.56	-9.64	2.16	21.2	3.57	12.8	3.55	1.87	10.4	1.14	0.623	15.2	-2.05	2.94	-1.74	1.03	-5.02	2.76	11	2.64	2.02	3.43	3.7	1.29	2.88	0.34	1.24	0.507	3.35	3.6	2.14	0.566	1.4	1.44	0.584	0.668	-5.29	1.01	3.89	0.952	3.88	5.94
cg01021552	16	65046268	CDH11	1009	2	blue	1.76	17.6	14.7	8.52	-10.3	3.04	-4.72	0.426	-0.666	-8.98	1.48	-3.04	-1.22	3.85	-1.21	11.2	2.19	10.4	1.54	-4.2	0.23	1.94	-2.48	5.52	3.2	4.48	4.29	3.34	3.26	4.62	2.98	-1.07	1.89	0.826	-0.519	0.955	0.8	9.96	4.99	-0.492	0.556	-2.61	-3.13
cg01021631	1	56902689		NA	2	blue	-0.159	25.5	13.4	14.7	-10.2	2.91	-5.35	1.17	-5.58	-14.8	1.98	-8.72	1	0.0341	-0.231	11.6	1.59	5.65	0.599	-6.48	-0.00705	2.14	-5.68	4.3	2.2	4.6	2.18	0.0819	1.35	3.09	1.99	0.302	0.367	-0.265	-2.23	0.91	-0.00624	12.1	7.31	-0.287	-1.26	-6.9	-4.78
cg01022780	3	48598236		NA	3	brown	-0.158	11.9	20.9	3.97	-10.2	4.82	-6.67	2.03	1.9	-2.51	3.69	4.01	-2.75	12.5	-0.388	12.8	3.59	12.1	0.646	0.0146	-0.0261	1.91	3.31	8.04	3.63	7.92	2.27	7.7	9.38	5.18	0.108	-0.852	4.27	1.53	0.949	1.72	0.057	6.22	1.53	0.985	2.72	1.2	-2.66
cg01024247	7	5535740	MIR589;FBXL18	NA	2	blue	-2.82	21.2	11.4	19.5	-6.39	5.9	-3.85	0.0812	-8.43	-13.2	5.05	-10.5	4.74	-0.969	-0.515	14.6	0.422	2.14	-1.56	-2.92	-2.24	4.8	-7.46	3.87	4.23	6.74	1.25	-0.62	3.69	5.73	3.15	0.862	0.441	-0.692	-1.72	0.542	0.751	13.5	9.26	0.321	-1.39	-7.9	-1.28
cg01025720	13	113346439	ATP11A;ATP11A	23250	8	pink	6.63	2.64	1.06	3.09	4.35	-1.01	7.51	17.4	4.9	2.53	-4.88	1.55	4.34	2.23	1.2	3.21	1.05	4.47	13.4	3.84	11.8	-1.02	8.56	6.66	-5.24	3.87	4.36	4.64	3.38	-5.07	1.99	10	0.268	0.456	0.411	1.48	-5.84	-0.578	0.826	-0.496	0.175	-1.21	-0.154
cg01025800	19	807340	PTBP1;PTBP1;PTBP1;PTBP1	5725	5	green	2.93	-6.38	-12.4	1.74	18.6	-0.443	14	3.06	1.25	6.61	-0.886	-2.24	11.2	-6.66	3.41	-3.81	1.06	-6.83	3.73	6.85	2.72	0.0428	0.813	-0.0291	1.85	-1.97	-0.458	-2.62	-1.7	-0.517	3.39	4.05	-1.82	1.31	0.204	-1.17	0.368	-4.78	0.993	2.99	-0.198	0.155	4.8
cg01025883	16	23867088	PRKCB;PRKCB	5579	5	green	-0.334	-6.04	-8.23	1.69	20.4	4.69	11.5	4.44	0.641	10.1	2.13	1.63	13.8	-0.965	3.34	-0.371	-1.63	-5.8	2	13.2	2.04	4.02	4.07	2.8	-0.421	4.89	-1.62	1.79	2.56	2.54	3.63	4.32	-0.28	1.06	0.608	0.493	-1.1	-3.74	-0.602	3.61	0.447	2.62	6.45
cg01027750	19	42636639	POU2F2	5452	3	brown	-0.0823	8.51	18.3	3.09	-7.83	5.14	-4.84	0.752	2.45	-0.758	3.12	5.14	-2.54	12.5	0.261	13.2	4.03	11.2	-0.355	2.22	-0.126	1.89	3.3	7.21	4.52	7.38	1.49	7.78	13.1	6.11	-0.0687	-1.77	4.72	2.54	1.93	0.401	0.324	5.46	1.52	1.61	3.75	1.74	-0.98
cg01027937	4	74486080	RASSF6;RASSF6;RASSF6	166824	3	brown	-0.29	14.4	22	6.08	-12.4	4.48	-7.54	0.974	-0.0802	-5.93	3.05	0.925	-3.15	9.19	-0.771	13.8	4.21	10.8	-0.331	-1.9	-0.239	1.01	0.808	7.45	3.67	6.92	2.14	6.25	7.77	4.91	-1.08	-2.07	4.92	2.04	1.29	1.57	1.24	7.58	3.98	0.917	2.34	-1.78	-3.08
cg01027976	22	42734612		NA	4	yellow	-0.541	18.3	9.16	20.4	-2.97	5.5	-0.635	2.2	-6.01	-9.97	4.12	-9.39	7.01	-0.88	0.513	14.4	2.45	2.79	0.702	-0.701	-0.0862	3.68	-5.23	6.67	4.43	6.93	2.04	0.835	4.86	5.72	3.39	1.21	0.266	0.121	-2.15	0.599	0.882	10.2	8.38	1.28	-1.38	-6.05	-1.92
cg01028379	7	4798471	FOXK1	221937	5	green	3.02	-5.82	-11	1.86	20.9	1.25	15.1	4.76	2.12	8.26	-0.37	-0.488	12.9	-4.06	3.18	-2.53	0.226	-5.37	4.75	9.19	3.54	1.53	2.77	2.99	-0.561	1.22	0.479	0.602	-0.137	0.606	4.53	3.77	-0.3	2.02	1.02	-0.825	0.941	-4.95	0.829	2.95	0.753	1.99	5.63
cg01028925	7	2122103	MAD1L1;MAD1L1;MAD1L1	8379	4	yellow	-0.305	23.6	12.5	17.6	-7.38	3.81	-3.07	0.942	-6.02	-13.5	3.51	-9.27	3.32	-0.268	-0.226	14.5	3.99	4.48	0.191	-3.69	-0.637	1.72	-6.31	6.64	4.89	5.56	2.58	0.829	4.08	4.63	1.66	-0.426	1.25	0.137	-0.697	1.16	0.958	11.1	9.26	0.121	0.0563	-7.12	-3.58
cg01029568	5	83860878		NA	2	blue	3.02	19.6	12.4	11	-10.1	0.85	-3.81	0.99	-1.82	-12	-0.578	-6.31	-0.656	0.623	-1.11	9.78	3.74	8.36	2.33	-6.54	1.74	-0.839	-4.03	4.39	2.82	1.99	4.91	0.409	1.52	2.55	1.21	-1.13	-0.472	-0.569	-3.04	0.473	-0.194	8.62	5.42	-0.713	-2.03	-4.85	-3.81
cg01030406	4	113374553		NA	3	brown	-2.68	17.6	19	9.69	-11.5	5.91	-8.5	-0.56	-3.66	-8.7	5.24	-2.56	-0.655	5.89	-1.2	14.5	1.3	7.73	-2.1	-2.97	-2.67	3.98	-2.82	4.12	4.77	7.19	1.3	2.41	5.82	6.46	1.28	-0.491	2.63	0.876	-0.877	1.5	0.611	12.1	4.87	0.377	0.875	-2.21	-2.31
cg01030476	1	236686564	LGALS8;LGALS8;LGALS8;LGALS8	3964	5	green	0.108	-9.38	-9.32	-2.06	17.5	2.43	10.6	4.15	2.25	11.8	1.41	3.68	9.12	-0.329	3.68	-2.85	-1.49	-5.6	2.18	11.8	1.92	2.55	5.24	1.11	-0.806	2.48	-2.3	1.56	2.36	0.572	2.1	4.27	2.59	3.05	3.71	0.0446	-1.21	-5.7	-0.41	3.81	2.6	3.38	5.53
cg01031897	10	133948362	JAKMIP3	282973	5	green	5.57	-7.2	-14	0.191	18.9	-2.32	16.3	4.5	3.41	7.3	-3.11	-1.32	9.69	-6.45	2.58	-5.61	2.54	-5.27	5.84	6.03	4.95	-2.35	2.15	1.54	-0.408	-3.08	1.31	-1.46	-2.47	-2.29	2.31	2.88	-2.06	1.07	0.7	-0.323	0.327	-7.43	0.119	1.96	-0.243	2.05	4.8
cg01031983	3	126066447	KLF15	28999	3	brown	-3.26	22.2	17	13.3	-13	4.76	-9.8	-1.2	-7.16	-14.1	4.26	-7.19	-0.396	2.09	-1.18	13	0.812	4.97	-3.02	-6.15	-2.77	2.81	-6.07	2.59	3.48	5.71	0.653	-0.605	2.74	4.75	-0.0388	-1.09	0.745	-1.09	-1.93	1.1	0.39	12.5	5.88	-0.147	-1.22	-5.91	-4.38
cg01032653	7	99768028	GPC2	221914	2	blue	2.27	19.9	9.64	14.4	-7.08	1.35	-2.47	2.04	-3.78	-12.3	-0.622	-8.88	2.45	-1.15	-1.02	9.33	2.43	5.39	2.18	-5.65	2.56	0.28	-4.64	4.76	0.998	3.51	4.43	-0.000502	0.119	2.16	1.43	-0.352	0.377	-0.596	-2.07	0.555	0.0414	8.69	7.94	-1.79	-1.52	-5.93	-3.83
cg01032851	16	68994912	TMCO7	NA	2	blue	-1.63	19.3	13.8	13	-8.99	4.53	-4.84	-0.363	-4.96	-11.8	4.45	-6.42	0.966	1.49	-0.535	13.4	1.3	5.8	-0.758	-3.74	-2.56	3.97	-5.78	4.03	5.07	5.37	2.05	0.342	4.06	5.25	3.44	0.533	1.02	0.754	-1.51	0.24	0.676	13.9	6.51	0.317	-0.229	-5.59	-2.82
cg01033005	19	33350931	SLC7A9;SLC7A9	11136	1	turquoise	8.33	0.189	0.254	-0.76	4	-2.12	7.48	17.1	8.58	4.81	-6.7	4.82	1.96	4.03	1.24	0.224	-0.441	6.3	15.7	3.64	13	-0.945	11.7	6.1	-7.58	2.68	4.57	6.14	2.3	-5.78	3.06	9.8	2.24	1.99	2.73	1.82	-5.86	-2.21	-0.216	0.293	2.51	1.82	2.04
cg01033642	16	81564192	CMIP;CMIP	80790	5	green	1.2	-6.79	-11.6	1.92	25.5	2.55	14.7	5.21	1.13	9.41	1.09	-0.146	14.5	-3.8	2.71	-2.27	-0.961	-6.69	3.79	11.2	2.69	2.9	3	2.07	-0.373	2.49	-0.462	0.433	0.515	0.909	4.38	5.26	0.092	1.87	1.62	0.114	0.825	-4.63	1.12	3.13	0.903	1.86	6.82
cg01033871	6	32064837	TNXB	7148	2	blue	-3.14	17.8	9.73	17.7	-4.76	6.47	-3.54	1.27	-8.34	-10.8	5.83	-9.5	5.59	-0.509	-0.174	12.8	-0.488	1.41	-0.942	-1.88	-2.17	6.33	-6.04	4.46	3.74	7.9	0.762	0.315	3.08	5.74	4.59	2.59	2.37	0.928	0.536	1.27	1.44	13.7	11.3	1.48	0.781	-5.23	0.0161
cg01034287	15	29431573	FAM189A1	23359	8	pink	2.49	0.688	0.614	2.1	5.24	1.6	5.05	19.6	2.85	4.28	-1.55	2.84	5.28	3.83	1.7	2.82	-1.3	1.91	10.7	5.96	8.89	1.08	9.85	5.77	-6.08	6.62	1.14	5.63	4.07	-4.79	0.813	12.9	0.619	0.735	1.88	2.21	-5.06	-1.49	-0.819	1.31	1.51	0.347	2.77
cg01034813	16	27487047	GTF3C1	2975	5	green	1.29	-8.64	-10.5	-0.534	23.3	2.66	14.2	5.98	2.99	12.3	0.525	2.8	11.7	-1.25	2.79	-2.54	-1.19	-5.28	4.06	13.1	3.66	2.54	5.85	2.13	-1.28	2.95	-0.684	1.99	2.02	0.582	3.28	5.49	0.882	2.16	2.72	0.856	-0.771	-6.19	-0.601	3.08	2.1	3.17	6.85
cg01034993	15	68992751	CORO2B	10391	2	blue	-1.79	22.6	12.2	18.5	-7.07	4.96	-3.95	0.0871	-7.64	-13.1	4.46	-10.3	4.03	-0.713	0.0627	14	2.2	3.16	-1.09	-3.78	-1.83	3.76	-7.07	4.85	5.65	5.62	1.55	0.397	3.5	5.71	3.08	0.326	0.821	0.545	-1.79	-0.11	1.5	13.1	9.66	0.697	-0.56	-6.75	-1.37
cg01035640	17	41795679		NA	4	yellow	-0.31	17.4	8.69	15	-6.68	1.7	-3.32	0.0453	-6.74	-13.4	1.49	-11	2.56	-2.94	-0.08	9.86	3.38	2.26	-0.385	-5.53	-0.112	0.53	-7.35	3.67	3.88	2.41	1.43	-2.37	0.918	2.44	1.09	-0.234	-0.68	-0.432	-2.6	0.306	0.522	9.87	8.44	-0.442	-1.66	-5.78	-3.71
cg01035931	19	47367462		NA	5	green	1.17	-5.54	-8.05	1.22	17.2	3.45	10.3	3.72	1.82	10.6	1.83	1.46	12.9	-1.4	4.83	-1.66	-0.142	-4.58	2.56	9.74	1.85	2.79	4.03	2.43	0.636	2.57	-1.16	-0.197	0.79	2.55	4.01	3.28	0.373	1.31	1.28	1.69	0.919	-4.34	0.231	5.78	1.27	2.83	5.74
cg01036164	15	40545324	PAK6;PAK6;PAK6;C15orf56	NA	3	brown	2.53	10.6	17.5	5.4	-7.71	3.03	-3.01	2.54	2.9	-2.47	1.31	2.4	-1.7	8.83	0.33	13.6	7.64	11.6	1.91	0.526	2.03	-1.14	2.79	8.13	5.5	5.01	2.65	6.32	10.7	3.93	-1.32	-1.48	3.4	2.9	0.902	0.000316	0.605	4.22	2.63	1.22	2.48	-0.393	-2.27
cg01036351	2	207506480	LOC200726	200726	3	brown	-1.46	11.8	23.3	4	-12.6	4.8	-9.16	0.497	-0.0347	-4.31	3.45	2.95	-3.98	11.4	-0.929	13	3.58	10.9	-1.57	-1.14	-0.697	1.25	1.99	6.73	3.37	7.59	1.22	6.58	8.73	4.99	-1.82	-2.23	4.22	0.956	1.25	1.12	0.638	6.34	2.1	0.199	2.43	-0.801	-2.53
cg01037496	18	686346	ENOSF1;ENOSF1;ENOSF1	55556	2	blue	-1.27	25.2	12.2	15.4	-11.5	2.18	-6.35	-1	-7.91	-19.2	2.7	-11.6	0.368	-2.26	-1.04	10.7	1.79	3.72	-1.1	-8.26	-2.01	1.72	-9.19	2.44	4.01	2.77	1.89	-2.19	0.0615	3.06	1.67	-0.298	-0.563	-1.06	-2.71	0.0034	0.905	13.2	8.12	-0.863	-1.95	-7.31	-4.68
cg01037683	17	20056493	CYTSB;CYTSB	NA	2	blue	-4.57	20.9	16.4	13.4	-11	6.81	-8.37	-0.468	-7.58	-13.1	5.81	-6.75	0.892	2.39	-1.19	15.3	0.201	4.12	-3.12	-3.32	-3.04	4.86	-5.87	3.73	3.83	8.06	0.189	1.17	4.53	6.06	1.19	0.198	1.17	-0.432	-1.61	0.322	0.65	13.7	6.34	-0.000138	-0.734	-5.14	-3.42
cg01040624	3	124828123	SLC12A8	84561	5	green	0.336	-6.33	-9.43	1.33	19.3	3.25	11.1	5.29	0.385	9.43	0.812	0.831	13.1	-2.23	3.89	-2.02	-0.831	-6.58	2.51	10.4	3.35	1.91	3.89	1.78	-1.58	3.31	-2.2	0.46	0.221	0.76	1.46	4.28	-1.04	0.788	0.221	0.574	-0.569	-5.52	-1.02	3.98	-0.0472	2.48	4.04
cg01040786	5	78043895		NA	4	yellow	-2.61	22.2	11.6	18.2	-6.87	5.95	-4.22	0.507	-8.02	-13.4	4.89	-9.82	4.3	-0.32	-0.44	13.9	0.53	3.1	-1.15	-3.16	-1.93	4.45	-7.08	4.74	3.37	7.05	1.44	0.0576	3.04	5.94	2.84	0.376	0.556	-0.879	-1.87	0.248	0.881	12.8	8.31	0.366	-1.22	-6.43	-2.25
cg01041239	18	13222581	C18orf1;C18orf1	NA	10	purple	6.42	-12.3	-6.68	-9.56	9.89	-3.2	8.88	3.3	11.5	17.3	-4.64	10.5	1.04	3.28	2.01	-6.54	4.55	1.05	5.03	6.94	5.51	-5.44	10.5	1.92	-0.714	-3.56	1.67	3.58	0.908	-2.65	-1.81	-0.439	0.656	1.72	1.74	-0.433	-0.605	-13.3	-5.25	1.28	1.41	7.63	2.08
cg01041717	13	107009062		NA	2	blue	1.95	17.5	10.8	10.5	-8.52	1.21	-3.23	1.31	-2.43	-10.9	0.597	-6.23	0.114	0.479	-0.883	9.46	3.3	6.75	1.94	-5.27	1.03	0.258	-3.93	5.33	2.47	3.1	3.81	1.9	1.34	2.26	1.7	-0.785	1.78	0.665	-0.706	0.24	0.978	8.48	7.68	-0.993	-0.309	-5.02	-3.31
cg01042368	17	36500237	GPR179	440435	2	blue	0.431	20.1	11.1	17.9	-3.36	5.85	-1.1	2.29	-4.08	-7.61	4.45	-6.87	6.96	1.83	0.397	14.3	3.97	5.24	1.37	-0.428	0.187	3.25	-3.5	9.3	5.42	8.14	3.33	3.26	4.74	7.09	3.44	0.205	1.82	0.294	-1.33	-0.0303	1.56	9.84	8.79	1.05	-0.471	-3.73	-2.33
cg01043196	16	68362223	PRMT7	54496	4	yellow	-1.94	17.4	9.82	15.1	-6.42	3.75	-3.49	0.556	-7.07	-12.4	2.68	-9.22	3.21	-1.08	-0.0425	11.6	0.511	2.34	-0.766	-3.45	-0.712	3.26	-6.55	3.27	2.39	5.36	0.972	-0.636	2.24	3.58	2.04	0.816	-0.404	-1.15	-2.89	0.435	0.462	11.4	7.3	0.314	-2.41	-6.12	-3.23
cg01043250	9	135582139		NA	2	blue	-0.2	18.3	12.8	12.2	-7.55	3.96	-3.83	3.98	-3.63	-9.89	2.22	-5.65	1.68	2.08	-0.958	12.7	0.327	6.44	2.16	-2.84	1.13	3.46	-2.37	4.94	1.11	6.68	2.78	2.21	4.42	2.54	2.82	3.05	1.11	0.117	-1.26	0.87	-0.4	11.2	6.45	-0.656	-0.46	-4.78	-1.86
cg01043616	12	50475035	ACCN2;ACCN2	NA	10	purple	1.16	-10.7	-4.25	-6.69	12	3.21	7.68	3.15	8.1	19.2	1.14	12.3	4.38	6.84	1.9	-1.54	-0.0402	0.352	2.15	14.8	2.15	2.35	10.7	2.59	0.184	3.37	-0.522	5.9	6.41	2.35	1.96	2.53	4.15	3.7	4.73	0.395	-0.109	-6.36	-2.8	2.36	5.45	7.27	6.16
cg01043681	12	77425602	E2F7	144455	5	green	0.328	-7.55	-12.3	1.2	23.3	2.52	12.7	3.93	0.121	9.03	0.683	-0.194	13.7	-3.88	3.83	-3.22	-1.2	-7.79	2.04	10.5	2.62	2.41	2.55	1.22	-1.17	2.27	-2.09	0.0757	-0.237	0.928	2.59	3.8	-0.692	1.82	1.08	-0.859	0.109	-5.37	-0.306	3.19	0.296	3.11	6.09
cg01045835	5	82969530	HAPLN1	1404	2	blue	-1.56	23.5	12.7	16.4	-8.45	4.77	-5.11	0.621	-6.77	-13.4	4.08	-9.19	2.72	-0.107	-0.614	12.7	1.12	4.65	-0.232	-4.8	-1.56	3.51	-6.43	4.35	3.7	5.58	2.13	-0.15	2.19	5.02	2.8	0.635	0.459	-0.808	-2.04	1.31	0.479	12.8	8.05	0.33	-1.58	-6.29	-3.3
cg01045971	10	1083259	C10orf110;C10orf110;C10orf110;C10orf110	NA	2	blue	-3.12	25.6	13.5	17.3	-10.1	4.86	-6.54	-0.484	-9.12	-17.1	4.4	-10.7	2.08	-0.865	-0.73	13.4	0.107	2.88	-2.08	-5.45	-2.5	3.91	-8.38	2.68	3.47	5.79	0.782	-1.14	2.17	4.69	1.92	0.301	-0.0623	-1.29	-2.25	0.309	0.242	14.5	7.99	-0.085	-1.77	-7.06	-3.46
cg01046434	14	20937221	PNP	4860	6	red	-7.2	3.81	4.99	6.4	2.26	17.4	-2.05	-0.13	-4.35	1.64	10.9	1.17	7.73	5.72	1.53	9.19	-1.66	-0.446	-4.78	8.58	-4.46	9.27	0.246	3.75	5.58	11.8	-2.84	3.78	8.33	13	2.91	1.36	3.74	1.18	2.63	2.08	1.43	5.37	2.93	4.53	2.27	0.667	3.45
cg01047043	16	29823197	PRRT2	112476	30	steelblue	-3.29	2.7	3.42	3.89	1.28	10.7	-0.272	-6.12	-1.12	1.26	8.2	0.856	4.56	3.64	0.342	6.06	0.974	1.51	-5.36	5.34	-6.14	7.71	-2.49	4	9.34	6.2	0.305	3.37	5.36	17.2	5.93	-4.23	4.21	3.68	2.57	0.672	5.75	4.87	2.76	3.34	3.73	1.83	4.44
cg01047613	20	31446682	EFCAB8	388795	4	yellow	-3.79	18.7	9.91	19.5	-5.19	6.61	-3.87	0.352	-9.5	-12.3	5.96	-10.8	5.8	-1.28	0.554	13.5	0.0686	0.813	-2.19	-2.24	-2.68	5.04	-7.35	3.77	4.14	7.38	-0.37	-0.701	3.23	5.95	2.65	1	-0.22	-1.58	-2.75	0.165	0.745	12.3	8	1.08	-2.09	-7.88	-2.27
cg01048187	12	120538681	RAB35;RAB35	11021	4	yellow	-1.41	15.3	7.49	19.1	-2.54	4.48	-0.765	1.11	-7.21	-10.1	3.56	-10.3	6.93	-2.31	1.8	12.7	1.82	0.35	-0.508	-1.11	-0.507	3.28	-6.28	4.28	3.91	5.54	-0.235	-1.51	3.94	4.63	2.5	1.23	0.7	0.463	-1.37	-0.133	0.93	9.73	10.4	2.59	-1.07	-7.62	-1.29
cg01048203	14	21027321	RNASE9;RNASE9;RNASE9;RNASE9;RNASE9;RNASE9;RNASE9	390443	8	pink	9.04	-0.178	0.647	0.142	5.81	-0.883	9.19	17.8	9.36	6.96	-4.8	5.42	4.04	4.91	1.79	2.05	3.64	6.34	15.1	6.23	12.2	-3.19	12.6	8.89	-3.97	3.12	4.87	7.21	5.1	-4.24	0.755	7.38	1.72	2.04	2.27	1.76	-4.56	-5.2	-0.772	1.26	2.22	3.14	1.73
[truncated: 29,454 more rows]
[truncated: 12 more columns]
